# Supplementary material for: Terpenoids and their gene regulatory networks in Opisthopappus taihangensis ‘Taihang Mingzhu’ as detected by transcriptome and metabolome analyses
Source: Frontiers journal article supplement (doi:10.3389/fpls.2022.1014114), 2022-09-29
Supplement: Data_Sheet_1.zip [file Data_Sheet_1.zip]

## Sheet: F1TH-1 vs F1TH-3
Index	Formula	Compounds	Class I	CAS	F1TLeaf-1	F1TLeaf-2	F1TLeaf-3	F1Tcolour-1	F1Tcolour-2	F1Tcolour-3	VIP	P-value	Fold_Change	Log2FC	Type
XMW1056	C6H10O2	2-Butenoic acid, ethyl ester, (Z)-	Ester	6776-19-8	3348.97	6800.57	4001.54	127762	104081	115922	1.0717	0.00314095	24.5752	4.61913	up
XMW0225	C4H8OS	Thiirane, (methoxymethyl)-	Heterocyclic compound	19858-14-1	6851.13	8482.74	6122.92	55709.1	46881.9	51295.5	1.07535	0.00189179	7.17192	2.84236	up
KMW0045	C2H6S2	DiSulfur compounds, dimethyl	Sulfur compounds	624-92-0	189002	106831	177664	9975.54	7881.02	8928.28	1.07198	0.0284841	0.0565682	-4.14386	down
XMW0887	C8H16O2	Butanoic acid, 2-methyl-, propyl ester	Ester	37064-20-3	16672.3	27874.3	12127.2	586959	486028	536494	1.07044	0.00257811	28.399	4.82777	up
WMW0107	C8H14	1,5-Heptadiene, 2-methyl-, (Z)-	Hydrocarbons	41044-64-8	263023	139656	99945.8	949163	946981	948072	1.03332	0.00392861	5.65873	2.50048	up
KMW0046	C6H12O	2-Hexanone	Ketone	591-78-6	199648	104783	75650.8	808872	795768	802320	1.03814	0.00281779	6.33273	2.66283	up
XMW0115	C4H9NO	5-Methyloxazolidine	Heterocyclic compound	58328-22-6	152737	77970.2	62918	585470	581069	583269	1.04045	0.00320483	5.95932	2.57515	up
KMW0067	C6H10O	3-Penten-2-one, 4-methyl-	Ketone	141-79-7	57322.4	32565.2	28622	171039	171306	171173	1.04197	0.0046188	4.33313	2.11541	up
KMW0133	C7H16O	1-Hexanol, 4-methyl-	Alcohol	818-49-5	9	9	9	6187.92	7062.89	6625.41	1.08177	0.00145415	736.156	9.52387	up
XMW0888	C8H16O2	Butanoic acid, 3-methyl-, propyl ester	Ester	557-00-6	9	9	9	587938	505149	546544	1.08177	0.00190667	60727.1	15.8901	up
KMW0159	C7H16O	1-Heptanol	Alcohol	111-70-6	5742.86	7068.19	9557.85	82576.3	69729.1	76152.7	1.072	0.00144503	10.2132	3.35236	up
KMW0057	C5H10O	2-Penten-1-ol, (Z)-	Alcohol	1576-95-0	9	9	9	184029	137337	160683	1.08162	0.0069639	17853.7	14.1239	up
KMW0079	C8H18	Octane	Hydrocarbons	111-65-9	184313	98232.5	70889.2	737922	721675	729798	1.03843	0.00267611	6.19462	2.63102	up
KMW0066	C6H12O	Hexanal	Aldehyde	66-25-1	1.51136e+06	802114	558606	5.9468e+06	5.86802e+06	5.90741e+06	1.03542	0.00315675	6.17053	2.62539	up
XMW1432	C7H12	2,4-Dimethyl 1,4-pentadiene	Hydrocarbons	4161-65-3	52268.2	27476.3	20203.3	203558	200448	202003	1.03763	0.00308165	6.06326	2.60009	up
WMW0187	C6H14O	2-Hexanol	Alcohol	626-93-7	312090	167461	126871	1.18714e+06	1.16814e+06	1.17764e+06	1.0397	0.00306766	5.82584	2.54247	up
XMW0279	C7H14O	E-1-Methoxy-4-hexene	Hydrocarbons	134777-60-9	284797	147424	106196	1.11131e+06	1.10148e+06	1.1064e+06	1.03565	0.00330374	6.16473	2.62404	up
KMW0070	C8H10	Benzene, 1,3-dimethyl-	Aromatics	108-38-3	21641.1	15466.3	17340.8	380675	332477	356576	1.07918	0.00144109	19.6467	4.29622	up
XMW0484	C7H10O	Furan, 2-propyl-	Heterocyclic compound	4229-91-8	52561.4	27876.8	19474.2	203047	201181	202114	1.03483	0.00336445	6.06873	2.6014	up
NMW0756	C4H10O2	1,3-Butanediol	Alcohol	107-88-0	312014	166391	123102	1.18413e+06	1.16108e+06	1.1726e+06	1.03767	0.00309641	5.84834	2.54803	up
XMW0574	C8H14O2	4-Penten-1-ol, propanoate	Ester	30563-30-5	4048.34	1916.19	2462.01	405984	363410	384697	1.07768	0.0010061	136.959	7.0976	up
KMW0140	C5H7NS	Thiazole, 4,5-dimethyl-	Heterocyclic compound	3581-91-7	1.90705e+06	3.55154e+06	793040	19204.4	13850	16527.2	1.06263	0.123073	0.00793101	-6.97828	down
WMW0185	C8H8	1,3,5,7-Cyclooctatetraene	Ester	629-20-9	9	9	9	10269.6	7665.58	8967.57	1.08144	0.00696719	996.396	9.96058	up
XMW1117	C8H14O2	2-Propenoic acid, pentyl ester	Ester	2998-23-4	6233.17	3906.02	5651.19	1.46707e+06	1.26776e+06	1.36741e+06	1.08032	0.00177704	259.794	8.02122	up
KMW0036	C6H12O	3-Hexanone	Ketone	589-38-8	10541.7	5687.61	4262.9	39934.7	40551.2	40242.9	1.03995	0.00300585	5.89145	2.55862	up
KMW0047	C5H8O	2-Butenal, 2-methyl-	Aldehyde	1115-11-3	8581.14	4713.87	5430.91	44136.4	47623.1	45879.7	1.06523	1.77404e-05	7.3502	2.87778	up
XMW0630	C9H18	1-Hexene, 3,5,5-trimethyl-	Hydrocarbons	4316-65-8	9	9	9	181352	125005	153179	1.08151	0.0110902	17019.9	14.0549	up
XMW1114	C8H16	1-Octene	Hydrocarbons	111-66-0	263618	141373	99945.8	950688	944717	947702	1.03305	0.00391404	5.63062	2.49329	up
KMW0147	C7H9N	Pyridine, 2-ethyl-	Heterocyclic compound	100-71-0	9	9	9	38202.9	34863.9	36533.4	1.08178	0.00069573	4059.27	11.987	up
KMW0224	C8H10O	Benzene, (methoxymethyl)-	Ether	538-86-3	327168	158806	193238	6.28908e+07	5.33809e+07	5.81358e+07	1.07859	0.00223311	256.779	8.00438	up
KMW0060	C7H8	Toluene	Aromatics	108-88-3	5.79852e+06	4.15554e+06	4.42884e+06	930875	589992	760433	1.06466	0.0130286	0.158612	-2.65643	down
XMW0101	C7H14O2	1-Ethylpropyl acetate	Ester	620-11-1	921.697	830.872	703.897	3808.6	4510.26	4159.43	1.07526	0.00181839	5.07977	2.34476	up
XMW0671	C5H10N2	1,7-Diazabicyclo[2.2.0]heptane	Heterocyclic compound	279-42-5	19449.5	34282.5	7389.34	9	9	9	1.07414	0.120122	0.000441744	-11.1445	down
D131	C5H8O	3-Pentyn-1-ol	Alcohol	10229-10-4	43458.6	22711.6	16623.4	160406	155734	158070	1.03408	0.00314177	5.72761	2.51793	up
KMW0084	C5H5N	Pyridine	Heterocyclic compound	110-86-1	371839	225483	345928	15995.9	16631.5	16313.7	1.0756	0.0221222	0.0518858	-4.26852	down
XMW0312	C8H10	Ethylbenzene	Aromatics	100-41-4	11241.7	5892.65	8986.53	238592	198337	218464	1.07409	0.00265394	25.0908	4.64908	up
WMW0188	C5H8O	2-Pentyn-1-ol	Alcohol	6261-22-9	254674	131390	99347.6	927301	917956	922628	1.03507	0.00375767	5.70215	2.5115	up
NMW0754	C5H8O2	Acetylacetone	Ketone	123-54-6	9428.86	5361.42	3853.17	36784.4	33648	35216.2	1.03934	0.000516888	5.66679	2.50253	up
XMW0878	C7H10	1,4-Cyclohexadiene, 1-methyl-	Hydrocarbons	4313-57-9	16594.7	8752.81	7569.33	48558.9	47756	48157.4	1.03312	0.00549732	4.38901	2.1339	up
NMW0771	C4H9NO	N,N-Dimethylacetamide	Amine	127-19-5	18536.9	25118	7000.78	9	9	9	1.07587	0.0859355	0.000533011	-10.8735	down
KMW0405	C4H8O2	Propanoic Acid, 2-methyl-	Acid	79-31-2	2721.4	2680.91	3083.73	395338	309387	352362	1.08108	0.00500032	124.568	6.96079	up
XMW0436	C10H18O	2H-Pyran, 2-ethenyltetrahydro-2,6,6-trimethyl-	Heterocyclic compound	7392-19-0	2145.62	2351.21	2063.67	7596.63	5550.96	6573.79	1.06433	0.016064	3.00608	1.58788	up
KMW0097	C5H6OS	2-Methyl-3-furanthiol	Heterocyclic compound	28588-74-1	236391	273387	145787	30387.1	25577.7	27982.4	1.06184	0.0372102	0.128053	-2.96519	down
KMW0135	C6H8O	2-Cyclohexen-1-one	Ketone	930-68-7	9389.7	4979.62	6914.06	352988	279900	316444	1.07634	0.00450018	44.6044	5.47911	up
KMW0151	C6H12O3	Butanoic acid, 3-hydroxy-, ethyl ester	Ester	5405-41-4	880.957	1026.91	461.422	31700.9	29839.6	30770.3	1.07265	9.75854e-05	38.9614	5.28397	up
NMW0784	C7H12O2	Ethyl tiglate	Ester	5837-78-5	2.99433e+06	5.50909e+06	1.19369e+06	26597.8	24888.6	25743.2	1.06241	0.124492	0.00796419	-6.97226	down
KMW0148	C10H16	.alpha.-Pinene	Terpenoids	80-56-8	276795	171022	172920	1.15274e+07	9.00143e+06	1.02644e+07	1.07771	0.00513331	49.6076	5.63249	up
XMW0632	C10H16	Bicyclo[3.1.1]hept-2-ene, 3,6,6-trimethyl-	Terpenoids	4889-83-2	34883.6	21647.6	24661.2	241906	186204	214055	1.06923	0.00504195	7.90917	2.98353	up
WMW0023	C10H16	(+)-alpha-Pinene	Terpenoids	7785-70-8	299853	191519	175126	1.24099e+07	9.68164e+06	1.10457e+07	1.07738	0.00516421	49.7185	5.63571	up
XMW1229	C9H14	Bicyclo(3.3.1)non-2-ene	Hydrocarbons	6671-66-5	82428.9	40941.8	50475.1	1.67216e+07	1.40781e+07	1.53999e+07	1.07884	0.00245923	265.75	8.05393	up
D78	C4H6OS	Dihydro-3-(2H)-thiophenone	Heterocyclic compound	1003-04-9	1092.9	802.605	850.839	283288	236062	259675	1.08106	0.00276328	283.659	8.14802	up
XMW0519	C10H14	Cyclobutanespiro-2'-bicyclo[1.1.0]butane-4'-spirocyclobutane	Hydrocarbons	76308-11-7	113733	70837	68998.6	4.36444e+06	3.39804e+06	3.88124e+06	1.07736	0.00525579	45.9193	5.52103	up
XMW1300	C9H18	Cyclopentane, butyl-	Hydrocarbons	2040-95-1	21343.7	23010.3	17375.7	558451	448144	503297	1.07946	0.00423736	24.4597	4.61234	up
XMW1291	C8H16O2	1,3-Dioxolane, 4-methyl-2-(2-methylpropyl)-	Heterocyclic compound	18433-93-7	10096.6	17330.6	4030.67	9	9	9	1.07354	0.112389	0.00085829	-10.1862	down
NMW0787	C6H12O2	4-methyl-Pentanoic Acid	Acid	646-07-1	16672.3	23680.8	11056.5	585520	493108	539314	1.07294	0.00222847	31.4716	4.97598	up
WMW0201	C10H16	Bicyclo[2.2.1]heptane, 7,7-dimethyl-2-methylene-	Terpenoids	471-84-1	34232.5	19573.3	24669.8	242342	186435	214389	1.06692	0.00476378	8.19575	3.03488	up
XMW0890	C8H14O	1-Hepten-6-one, 2-methyl-	Ketone	10408-15-8	8534.36	4503.43	3358.86	1.69965e+06	1.42608e+06	1.56287e+06	1.0769	0.00255298	285.949	8.15961	up
KMW0113	C7H14O	2-Heptanone	Ketone	110-43-0	2636.71	4218.17	1894.13	10533.6	8730.92	9632.28	1.0103	0.00192665	3.30287	1.72372	up
XMW0901	C5H7ClO2	3-Chloro-2,4-pentanedione	Ketone	1694-29-7	1067.28	392.604	720.565	8118.74	6643.86	7381.3	1.05035	0.00107288	10.1556	3.34421	up
XMW0291	C5H9NO2	N-Acetylisoxazolidine	Heterocyclic compound	115615-36-6	2465.89	1883.12	1587.59	92538.9	73012.4	82775.7	1.07867	0.00476093	41.8299	5.38646	up
NMW0785	C5H8O2	Tiglic Acid	Acid	80-59-1	1.73291e+06	3.1682e+06	702765	16293	11427.7	13860.4	1.0628	0.122045	0.00742006	-7.07435	down
KMW0172	C10H16	Camphene	Terpenoids	79-92-5	34793	20222.6	24661.2	245171	169576	207374	1.06393	0.0118183	7.80805	2.96496	up
XMW0023	C10H16	4-methyl-1-(1-methylethyl)-Bicyclo[3.1.0]hex-2-ene	Hydrocarbons	28634-89-1	850460	415532	498941	1.57896e+08	1.3271e+08	1.45303e+08	1.07855	0.00250751	246.983	7.94827	up
KMW0112	C8H10	o-Xylene	Aromatics	95-47-6	11644.8	8262.3	10284.2	208415	186396	197406	1.07919	0.00090856	19.6155	4.29392	up
KMW0115	C8H8	Styrene	Aromatics	100-42-5	11798.4	7075.53	10643.3	874764	734907	804835	1.07889	0.00254273	81.7999	6.35403	up
XMW0307	C8H10	p-Xylene	Aromatics	106-42-3	25734	15768.2	17495.1	380675	331756	356215	1.076	0.00115285	18.1135	4.17899	up
XMW1299	C10H22	Heptane, 3,3,5-trimethyl-	Hydrocarbons	7154-80-5	14703.3	13605.7	8144.31	76256.6	58811	67533.8	1.05461	0.00345494	5.55783	2.47452	up
XMW0885	C10H16	Santolina triene	Hydrocarbons	2153-66-4	9	9	9	515589	458565	487077	1.08178	0.00114031	54119.7	15.7239	up
WMW0109	C8H16O2	Propanoic acid, 2-methyl-, 2-methylpropyl ester	Ester	97-85-8	14259	13109.1	7518.02	76301.1	60513.7	68407.4	1.05351	0.00201343	5.88264	2.55646	up
NMW0777	C4H8S2	DiSulfur compounds, methyl 2-propenyl	Sulfur compounds	2179-58-0	1254.9	1245.19	619.483	73392.8	58968.6	66180.7	1.07482	0.00398511	63.6441	5.99195	up
XMW1200	C7H12O2	2-Methylbut-2-en-1-yl acetate	Alcohol	33425-30-8	12447.4	16631.5	13803	658870	511685	585277	1.07971	0.00546034	40.9456	5.35564	up
XMW0065	C4H6N2	Fomepizole	Heterocyclic compound	7554-65-6	8798.32	5274.45	5349.79	302051	227626	264838	1.07656	0.00671753	40.9068	5.35427	up
XMW0013	C10H16	1,7,7-trimethyl-Tricyclo[2.2.1.0(2,6)]heptane	Terpenoids	508-32-7	106952	72290	72351	4.06893e+06	3.5729e+06	3.82091e+06	1.07924	0.00137796	45.5606	5.50971	up
XMW1058	C7H12O2	Cyclopentanol, acetate	Ester	933-05-1	9643.93	7138.31	5189.18	352395	280811	316603	1.07656	0.00431146	43.2293	5.43394	up
XMW1424	C2H3N3	1H-1,2,3-Triazole	Heterocyclic compound	288-36-8	20190.2	25362.4	21228.8	346100	245785	295942	1.07689	0.0108342	13.2945	3.73276	up
WMW0085	C4H10S2	Diethyl diSulfur compounds	Sulfur compounds	110-81-6	9	9	9	128834	121950	125392	1.08181	0.000251135	13932.4	13.7662	up
XMW0240	C10H22	3-Ethyl-3-methylheptane	Hydrocarbons	17302-01-1	16672.3	26406.5	11157.8	573493	492105	532799	1.07037	0.00152425	29.4708	4.88122	up
NMW0781	C4H8O3	Butanoic Acid, 4-hydroxy-	Acid	591-81-1	4534.08	6900.03	7228.88	82065.4	67341.9	74703.7	1.07281	0.00285502	12.0083	3.58596	up
XMW0641	C10H22	Heptane, 3,3,4-trimethyl-	Hydrocarbons	20278-87-9	25419.2	45376.8	9322.51	9	9	9	1.07418	0.124668	0.000337001	-11.535	down
NMW0783	C10H16	(1S)-2,6,6-Trimethylbicyclo[3.1.1]hept-2-ene	Terpenoids	7785-26-4	299277	187086	175082	1.2416e+07	9.68629e+06	1.10511e+07	1.0773	0.00516129	50.1227	5.64739	up
WMW0099	C9H16	Cyclopentene, 1-butyl-	Hydrocarbons	2423-01-0	19757.4	16014.8	12605.1	671687	528774	600231	1.07837	0.00486531	37.2218	5.21808	up
D447	C8H16O2	Pentanoic acid, 2-methyl-, ethyl ester	Ester	39255-32-8	9	9	9	56995.4	47813.9	52404.7	1.08172	0.00254914	5822.74	12.5075	up
XMW0651	C7H9N	Pyridine, 2,3-dimethyl-	Heterocyclic compound	583-61-9	10928.7	6749.31	9127.83	73972.9	62634	68303.4	1.07075	0.0011087	7.64425	2.93437	up
XMW0004	C10H16	Bicyclo[3.1.1]heptane, 6,6-dimethyl-2-methylene-, (1S)-	Terpenoids	18172-67-3	34905	20389.4	24671.3	223623	184882	204253	1.06811	0.00144505	7.66276	2.93786	up
XMW0889	C10H14	Bicyclo[3.1.0]hex-2-ene, 4-methylene-1-(1-methylethyl)-	Terpenoids	36262-09-6	10093.4	8403.47	4802.49	238187	225817	232002	1.07304	2.66621e-05	29.8723	4.90074	up
D350	C6H10O2	2-Pentenoic Acid, 2-methyl-	Acid	3142-72-1	43002.3	20785	22385.6	8.01196e+06	6.59622e+06	7.30409e+06	1.07808	0.00313306	254.283	7.99029	up
D181	C3H8O3	Glycerin	Alcohol	56-81-5	191.393	186.513	313.864	30773.1	24222.2	27497.6	1.07852	0.00475909	119.249	6.89783	up
KMW0164	C8H16O2	Pentanoic acid, 4-methyl-, ethyl ester	Ester	25415-67-2	9	9	9	101135	82270.5	91702.9	1.0817	0.00350873	10189.2	13.3148	up
NMW0791	C9H12	Benzene, 1-ethyl-2-methyl-	Aromatics	611-14-3	17477.8	13130.7	10307.2	4.4441e+06	3.76406e+06	4.10408e+06	1.08023	0.00229316	300.917	8.23322	up
KMW0169	C5H12OS	3-Mercapto-3-methylbutanol	Alcohol	34300-94-2	43659	19454.5	25735.1	7.29285e+06	6.42469e+06	6.85877e+06	1.07788	0.00133324	231.588	7.85542	up
KMW0168	C8H14O	5-Methyl-(E)-2-hepten-4-one	Ketone	102322-83-8	44123.2	25710.5	30424.9	8.55914e+06	7.22103e+06	7.89008e+06	1.07991	0.00240437	236.092	7.8832	up
KMW0178	C10H16	Bicyclo[3.1.0]hexane, 4-methylene-1-(1-methylethyl)-	Terpenoids	3387-41-5	849493	406168	500664	1.61857e+08	1.38066e+08	149961401	1.07849	0.00210021	256.151	8.00085	up
WMW0226	C5H4O2	4H-Pyran-4-one	Heterocyclic compound	108-97-4	9	9	9	92578.7	79385.8	85982.3	1.08175	0.00195657	9553.58	13.2218	up
XMW0181	C9H16O	5-Hepten-2-one, 4,6-dimethyl-	Ketone	31162-48-8	5664.02	2673	2596.5	1.26326e+06	1.06067e+06	1.16197e+06	1.07771	0.00253325	318.827	8.31663	up
D374	C10H18	(-)-trans-Pinane	Terpenoids	33626-25-4	6233.17	4098.65	5087.7	1.43309e+06	1.20601e+06	1.31955e+06	1.08066	0.00247608	256.73	8.00411	up
KMW0144	C7H14O2	Hexanoic acid, methyl ester	Ester	106-70-7	324.389	859.856	775.037	477661	347956	412809	1.07629	0.00815126	632.082	9.30397	up
XMW0301	C9H12	Mesitylene	Aromatics	108-67-8	14905.6	11982.1	11169.5	4.40112e+06	3.76406e+06	4.08259e+06	1.08124	0.0020349	321.825	8.33013	up
XMW0910	C5H6N2O	1H-Imidazole, 1-acetyl-	Heterocyclic compound	2466-76-4	5684.61	4913.33	3734.69	52827.4	42669.4	47748.4	1.07436	0.0035591	9.99433	3.32111	up
KMW0182	C9H14O	Furan, 2-pentyl-	Heterocyclic compound	3777-69-3	849189	700144	669447	159154	160593	159874	1.07665	0.00904145	0.216164	-2.2098	down
KMW0188	C4H8S2	2-Methyl-1,3-dithiacyclopentane	Heterocyclic compound	5616-51-3	14761.7	10659.8	11348.4	411654	411157	411405	1.08022	7.88823e-06	33.5659	5.06893	up
WMW0081	C9H12O	cis-2-(2-Pentenyl)furan	Heterocyclic compound	70424-13-4	1.50579e+06	1.07156e+06	1.14991e+06	449523	395832	422678	1.05931	0.0242807	0.340205	-1.55552	down
XMW0416	C10H16	1,3-Cyclohexadiene, 5-butyl-	Hydrocarbons	30168-57-1	6.8123e+06	4.56645e+06	5.08146e+06	26137.2	28094	27115.6	1.08057	0.0151284	0.00494203	-7.66068	down
KMW0235	C10H16	1,3,6-Octatriene, 3,7-dimethyl-, (Z)-	Terpenoids	3338-55-4	13447048	9.00792e+06	9.95971e+06	9	9	9	1.08162	0.0152402	8.32956e-07	-20.1953	down
XMW0149	C5H10N2	1H-Pyrazole, 4,5-dihydro-5,5-dimethyl-	Heterocyclic compound	4320-85-8	1.67128e+06	1.7474e+06	1.41831e+06	354401	274340	314370	1.07431	0.0041036	0.194979	-2.35861	down
KMW0183	C7H10N2	Pyrazine, 2-ethyl-5-methyl-	Heterocyclic compound	13360-64-0	6846.81	6071.21	7577.22	15001.5	13607.5	14304.5	1.06285	0.000235549	2.09382	1.06614	up
NMW0010	C10H12	Dicyclopentadiene	Hydrocarbons	77-73-6	585126	425662	443505	19162.8	17057.4	18110.1	1.07949	0.0114754	0.0373586	-4.74241	down
KMW0278	C6H6OS	Ethanone, 1-(2-thienyl)-	Heterocyclic compound	88-15-3	109056	216519	111430	29405.8	34768.2	32087	1.0319	0.0847997	0.220274	-2.18263	down
KMW0321	C8H14O2	Cyclohexanecarboxylic acid, methyl ester	Ester	4630-82-4	33681.2	13601.3	19630.9	294769	285043	289906	1.06118	5.00059e-05	12.9977	3.70018	up
XMW0585	C6H9NO3	5-Isoxazolecarboxylic acid, 4,5-dihydro-5-methyl-, methyl ester, (R)-	Heterocyclic compound	64018-42-4	12106.1	6273.81	13648.2	111096	87380.9	99238.5	1.05634	0.00304204	9.29545	3.21652	up
XMW0276	C7H12O	4-Hexen-3-one, 5-methyl-	Ketone	13905-10-7	8781.06	4964.61	5299.88	1289.18	675.401	982.291	1.04212	0.0454218	0.154728	-2.6922	down
KMW0176	C8H14O	5-Hepten-2-one, 6-methyl-	Ketone	110-93-0	1.13249e+07	1.1864e+07	9.55822e+06	2.38386e+06	1.96055e+06	2.1722e+06	1.07567	0.00515443	0.198998	-2.32917	down
XMW0100	C11H24	Octane, 5-ethyl-2-methyl-	Hydrocarbons	62016-18-6	2.59055e+06	2.68858e+06	2.18033e+06	547425	449155	498290	1.07568	0.00489776	0.200399	-2.31905	down
XMW0121	C12H24	1-Nonene, 4,6,8-trimethyl-	Hydrocarbons	54410-98-9	3172.57	919.449	4575.75	278927	261324	270126	1.05973	0.000212993	93.4931	6.54679	up
XMW0310	C6H12O2	2H-Pyran-2-methanol, tetrahydro-	Heterocyclic compound	100-72-1	34114.4	36156.8	43963.6	17384.1	20075.3	18729.7	1.05037	0.0180447	0.491873	-1.02364	down
KMW0241	C7H10N2	Pyrazine, 2-ethyl-3-methyl-	Heterocyclic compound	15707-23-0	869691	609924	640186	3.97432e+06	3.40452e+06	3.68942e+06	1.07098	0.000574044	5.22137	2.38443	up
KMW0244	C8H12N2	Pyrazine, 2-methyl-5-(1-methylethyl)-	Heterocyclic compound	13925-05-8	259573	160780	186030	3.56451e+06	3.08734e+06	3.32592e+06	1.07608	0.00129708	16.4546	4.04042	up
D373	C7H12O	2,4-Heptadien-1-ol, (E,E)-	Alcohol	33467-79-7	79734.6	112825	74349.8	37092.9	19907.1	28500	1.01042	0.0243489	0.320334	-1.64235	down
XMW0522	C8H11N	Pyridine, 3-propyl-	Heterocyclic compound	4673-31-8	5.68851e+06	3788193	4.20594e+06	143774	125820	134797	1.07885	0.0165429	0.029555	-5.08045	down
KMW0223	C10H16	1,3-Cyclohexadiene, 1-methyl-4-(1-methylethyl)-	Terpenoids	99-86-5	892226	570674	656065	4.0177e+06	3.44035e+06	3.72903e+06	1.06743	0.000389257	5.27951	2.4004	up
NMW0012	C9H12	Benzene, 1,2,3-trimethyl-	Aromatics	526-73-8	197831	171209	152470	716336	611040	663688	1.07274	0.00110935	3.81788	1.93277	up
XMW0598	C9H10	.alpha.-Methylstyrene	Aromatics	98-83-9	1449.72	1330.95	971.53	29503.9	25886.7	27695.3	1.07832	0.00130547	22.1432	4.46879	up
KMW0184	C6H9NS	Thiazole, 2,4,5-trimethyl-	Heterocyclic compound	13623-11-5	7347.84	6247.34	7457.45	9	9	9	1.08165	0.00302584	0.0012825	-9.60683	down
XMW1209	C9H18O2	Propanoic acid, 2-methyl-, 2-methylbutyl ester	Ester	2445-69-4	59306	58552.7	35379.6	648341	568769	608555	1.07167	0.000620702	11.9139	3.57457	up
XMW0774	C9H18O2	3-Hexene, 1-(1-methoxyethoxy)-, (Z)-	Hydrocarbons	54340-96-4	434.141	133.591	419.281	6260.56	5937.67	6099.12	1.04859	1.84159e-06	18.5381	4.21242	up
XMW1193	C7H16O2	1,2-Hexanediol, 2-methyl-	Alcohol	56255-50-6	8847.79	5905.2	5961.34	1828.78	1898.86	1863.82	1.05882	0.0351528	0.269932	-1.88933	down
XMW0658	C7H12O2	2-Heptenoic Acid	Acid	18999-28-5	10817.2	5011.12	4322.33	9	9	9	1.07752	0.0827542	0.00133991	-9.54365	down
XMW1332	C8H14O2	2,2'-Bifuran, octahydro-	Heterocyclic compound	1592-33-2	87844.8	66422.4	62100.7	1.07537e+06	1.01934e+06	1.04736e+06	1.07856	1.81039e-05	14.5219	3.86016	up
KMW0160	C4H10OS	1-Propanol, 3-(methylthio)-	Alcohol	505-10-2	6683.79	2609.55	7238.58	53146.1	46908	50027	1.03997	5.91623e-05	9.07827	3.18242	up
WMW0040	C10H16	trans-.beta.-Ocimene	Terpenoids	3779-61-1	1.9073e+07	1.28093e+07	1.42673e+07	50343.7	58947.4	54645.6	1.08059	0.0148999	0.00355228	-8.13704	down
KMW0250	C10H20O	7-Octen-2-ol, 2,6-dimethyl-	Terpenoids	18479-58-8	3602.78	4211.32	3637.28	40212	38754.8	39483.4	1.08071	8.46879e-06	10.3438	3.37069	up
XMW0659	C10H14	Benzene, n-butyl-	Aromatics	104-51-8	395536	269693	287139	5.12534e+06	4.46313e+06	4.79423e+06	1.07743	0.00125055	15.102	3.91667	up
NMW0793	C5H10O3	Butanoic Acid, 3-hydroxy-3-methyl-	Acid	625-08-1	8455.15	4225.19	6602.2	1.62763e+06	1.37244e+06	1.50004e+06	1.07877	0.00241819	233.377	7.86652	up
KMW0175	C6H6O	Phenol	Phenol	108-95-2	288790	233207	300509	848699	803744	826221	1.07064	8.79444e-05	3.01355	1.59146	up
XMW1204	C5H10O2S	Ethyl (methylthio)acetate	Ester	4455-13-4	23622.7	16941.9	19059.8	8337.89	4845.13	6591.51	1.02739	0.00945741	0.331652	-1.59226	down
WMW0127	C8H16O	3-Octen-1-ol, (Z)-	Alcohol	20125-84-2	14080.7	14181.6	12240.7	144894	142351	143622	1.08098	2.58047e-08	10.6379	3.41114	up
WMW0087	C9H18O2	Butanoic Acid, 3-methylbutyl ester	Ester	106-27-4	87452.6	69225	56061.5	1.07355e+06	1.01101e+06	1.04228e+06	1.07709	2.27209e-05	14.698	3.87755	up
WMW0227	C6H4Cl2	Benzene, 1,4-dichloro-	Aromatics	106-46-7	8925	3133.84	9281	1.00266e+06	942301	972480	1.07119	0.000276887	136.713	7.09501	up
KMW0199	C10H16	.beta.-Myrcene	Terpenoids	123-35-3	1.14552e+07	7.88097e+06	8.68569e+06	172280	163859	168070	1.07999	0.0136431	0.0179934	-5.79639	down
KMW0252	C10H16	1,3,7-Octatriene, 3,7-dimethyl-	Terpenoids	502-99-8	1.8938e+07	1.27906e+07	1.41579e+07	48010.5	54314.3	51162.4	1.08069	0.014617	0.00334493	-8.22381	down
XMW1308	C10H17F3O2	1-Octyl trifluoroacetate	Ester	2561-21-9	8899.13	9355.22	6589.28	48548	44190.6	46369.3	1.0729	4.25136e-05	5.59934	2.48526	up
XMW0091	C10H16O	3-Isopropylidene-5-methyl-hex-4-en-2-one	Ketone	64149-32-2	1.86938e+07	1.82731e+07	1.91051e+07	480329	482283	481306	1.08179	0.000173913	0.0257511	-5.27922	down
XMW0127	C10H14	o-Cymene	Terpenoids	527-84-4	190736	141604	146904	4.57845e+06	4.20447e+06	4.39146e+06	1.08008	0.000517514	27.4899	4.78083	up
KMW0243	C8H14O	(E)-2-Octenal	Aldehyde	2548-87-0	26275.4	21697.2	17908.4	356042	315508	335775	1.0781	0.000929771	15.2901	3.93452	up
D206	C6H8O2	1,2-Cyclohexanedione	Ketone	765-87-7	56431.6	36685.6	51624.1	149641	143969	146805	1.05374	0.00207863	3.04277	1.60539	up
NMW0029	C8H8O2	Formic acid, phenylmethyl ester	Ester	104-57-4	38520.2	52424.3	28001.3	9	9	9	1.08077	0.030393	0.000226994	-12.1051	down
XMW0412	C8H10O2	3-Acetyl-2,5-dimethyl furan	Heterocyclic compound	10599-70-9	683063	673542	690806	59230.7	58959	59094.9	1.0818	6.38871e-05	0.0865896	-3.52966	down
XMW1290	C6H10N2O	3-n-Propyl-2-pyrazolin-5-one	Heterocyclic compound	29211-70-9	4173.52	3506.33	2601.81	48653.6	41138.2	44895.9	1.07515	0.00191435	13.0998	3.71147	up
w43	C6H10O2	2-Oxepanone	Ester	502-44-3	4830.42	3946.37	3401.98	38279.2	28551	33415.1	1.07349	0.0079555	8.23116	3.0411	up
KMW0255	C7H10N2O	3-Methoxy-2,5-dimethylpyrazine	Heterocyclic compound	19846-22-1	4041.02	3355.23	3569.54	33011.5	29457.3	31234.4	1.07995	0.000957739	8.54505	3.09509	up
NMW0025	C8H8O2	Acetic acid, phenyl ester	Ester	122-79-2	23608.5	20995.9	18175.7	252104	242975	247539	1.07989	2.28246e-06	11.8289	3.56424	up
NMW0026	C4H8S2	1,4-Dithiane	Amine	505-29-3	10944.9	13656	12438.3	37496.1	37616.5	37556.3	1.07453	0.000946363	3.04187	1.60496	up
XMW0729	C11H18	Cyclohexane, 2-ethenyl-1,1-dimethyl-3-methylene-	Hydrocarbons	95452-08-7	34437.3	30187.5	29165.8	417639	391888	404764	1.08093	0.000226519	12.9468	3.69453	up
XMW0039	C8H14O	Cycloheptanone, 3-methyl-	Ketone	933-17-5	33930.7	27979.8	29165.8	417639	381329	399484	1.08054	0.000587023	13.1588	3.71795	up
XMW1305	C9H18O2	Ethyl 5-methylhexanoate	Ester	10236-10-9	492	239.675	281.672	22310.6	20691.9	21501.2	1.0762	0.000353204	63.654	5.99218	up
XMW0037	C10H14	Benzene, 1-ethyl-3,5-dimethyl-	Aromatics	934-74-7	150345	110760	114308	1.13141e+06	1.01073e+06	1.07107e+06	1.07712	0.000416746	8.55912	3.09746	up
XMW0578	C8H16O	Furan, 2-butyltetrahydro-	Heterocyclic compound	1004-29-1	87981.3	48666.9	28547.7	712460	613850	663155	1.04927	0.000193283	12.0431	3.59013	up
XMW0226	C9H18O	2-Heptanone, 4,6-dimethyl-	Ketone	19549-80-5	110270	76389.7	83166.3	1208.67	935.451	1072.06	1.07981	0.0132911	0.0119195	-6.39053	down
KMW0150	C9H12	Benzene, 1,2,4-trimethyl-	Aromatics	95-63-6	1.01541e+06	690713	746958	175732	152640	164186	1.06863	0.0223003	0.200792	-2.31623	down
XMW0678	C10H16	1,3-Cyclohexadiene, 1,5,5,6-tetramethyl-	Terpenoids	514-94-3	50563	26791	30923.3	1.11417e+07	9.30075e+06	1.02212e+07	1.07928	0.00270715	283.196	8.14566	up
KMW0170	C8H14O	1-Octen-3-one	Ketone	4312-99-6	9	9	9	167743	94292.9	131018	1.08108	0.0252076	14557.5	13.8295	up
XMW0051	C6H5NO	4-Pyridinecarboxaldehyde	Heterocyclic compound	872-85-5	21275.3	11221.2	12510.7	4.77643e+06	4.07746e+06	4.42694e+06	1.07924	0.00208058	295.082	8.20497	up
XMW1192	C6H9ClO2	2-Propenoic acid, 2-methyl-, 2-chloroethyl ester	Ester	1888-94-4	59130.4	37704.9	35925.6	1.11444e+06	910432	1.01243e+06	1.07582	0.00326011	22.878	4.51589	up
w09	C10H18	2,6-Octadiene, 2,6-dimethyl-	Hydrocarbons	2792-39-4	60887.1	37743.4	35925.6	1.53534e+06	1.04361e+06	1.28948e+06	1.07427	0.0125496	28.7496	4.84547	up
NMW0792	C6H4N2	4-Pyridinecarbonitrile	Heterocyclic compound	100-48-1	3191.5	1539.08	1657.09	629578	530218	579898	1.0782	0.00244833	272.352	8.08933	up
KMW0202	C8H18O	3-Octanol	Alcohol	589-98-0	18958.2	14176.4	15444	6201.07	5260.31	5730.69	1.06254	0.0155423	0.353903	-1.49857	down
KMW0193	C10H16	.beta.-Pinene	Terpenoids	127-91-3	315171	171571	169636	7.06141e+06	5.89862e+06	6.48002e+06	1.07394	0.0024254	29.6172	4.88836	up
KMW0173	C8H16O	1-Octen-3-ol	Alcohol	3391-86-4	10813.3	11026.7	12910.2	1.28951e+06	1.13666e+06	1.21308e+06	1.08129	0.00134287	104.726	6.71047	up
XMW0299	C8H16O2	Butanoic acid, butyl ester	Ester	109-21-7	212414	236915	210108	33082	45945.8	39513.9	1.07406	0.000540758	0.179762	-2.47584	down
XMW0306	C8H16O2	Heptanoic acid, methyl ester	Ester	106-73-0	9	9	9	10029	9104.63	9566.81	1.08177	0.000778544	1062.98	10.0539	up
WMW0086	C5H12S2	DiSulfur compounds, ethyl 1-methylethyl	Sulfur compounds	53966-36-2	2.11278e+06	1.40337e+06	1.56037e+06	38800.6	33202.5	36001.5	1.07923	0.0164537	0.0212754	-5.55467	down
XMW0202	C10H18	cis-2,6-Dimethyl-2,6-octadiene	Hydrocarbons	2492-22-0	4.66956e+06	4.85062e+06	3.94571e+06	904439	718881	811660	1.0757	0.00437071	0.180826	-2.46733	down
XMW1454	C6H6O3	Isomaltol	Heterocyclic compound	3420-59-5	3.75953e+06	4.00262e+06	3.24392e+06	804955	642648	723802	1.0753	0.00428948	0.197292	-2.3416	down
w06	C12H26	Heptane, 2,2,4,6,6-pentamethyl-	Hydrocarbons	13475-82-6	64520.8	53996.3	55316.9	14056.9	11158.1	12607.5	1.07488	0.00346378	0.217578	-2.2004	down
XMW0902	C10H18	2,6-Dimethyl-2-trans-6-octadiene	Terpenoids	2609-23-6	1.83869e+07	1.26236e+07	1.39969e+07	457516	411830	434673	1.07938	0.0139328	0.0289734	-5.10913	down
KMW0181	C10H16O	2,3-Dehydro-1,8-cineole	Terpenoids	92760-25-3	282195	315757	205316	53546.9	52645.4	53096.2	1.06787	0.0224074	0.198301	-2.33424	down
WMW0058	C8H16O	5-Hepten-2-ol, 6-methyl-	Alcohol	1569-60-4	808869	793782	931907	340673	293587	317130	1.07235	0.00381925	0.375367	-1.41363	down
NMW0794	C10H14	Benzene, (1-methylpropyl)-	Aromatics	135-98-8	9	9	9	61662.7	59848.2	60755.4	1.08181	7.43424e-05	6750.6	12.7208	up
D324	C6H8N2O	Pyrazine, 2-methoxy-6-methyl-	Heterocyclic compound	2882-21-5	45207.7	57754.1	30538.3	10086.5	9964.38	10025.5	1.0481	0.0482986	0.225291	-2.15014	down
D455	C7H14O3	Pentanoic acid, 2-hydroxy-4-methyl-, methyl ester	Ester	40348-72-9	1.85242e+07	1.26712e+07	1.39969e+07	439670	354552	397111	1.079	0.0142687	0.0263614	-5.24543	down
XMW0177	C8H12O	Ethanone, 1-(2-methyl-1-cyclopenten-1-yl)-	Ketone	3168-90-9	251690	305377	203623	49119.5	49168.5	49144	1.07069	0.0200492	0.193813	-2.36726	down
XMW1133	C10H16O	5-Isopropyl-3,3-dimethyl-2-methylene-2,3-dihydrofuran	Heterocyclic compound	81250-44-4	498088	496310	361422	5219.65	5528.56	5374.11	1.08044	0.0101171	0.0118912	-6.39396	down
KMW0192	C8H10O	Benzene, 1-methoxy-2-methyl-	Ether	578-58-5	165612	159103	132729	1.08949e+06	904908	997200	1.07728	0.00304795	6.53981	2.70925	up
WMW0103	C7H14O	2-Cyclopentylethanol	Alcohol	766-00-7	857488	1.10152e+06	624840	59382.8	51548	55465.4	1.07351	0.0279219	0.0643985	-3.95683	down
D269	C9H18O2	Butanoic acid, 2-methyl-, 2-methylpropyl ester	Ester	2445-67-2	17852	14000.3	17180.4	140260	114136	127198	1.07706	0.0038567	7.78245	2.96022	up
D417	C8H14O2	3-Hexen-1-ol, acetate, (E)-	Ester	3681-82-1	316360	384613	232976	55267.5	46173.4	50720.5	1.06606	0.026802	0.162923	-2.61774	down
XMW0712	C9H8	Benzene, 1-propynyl-	Aromatics	673-32-5	202618	137744	156299	9	9	9	1.08148	0.0133084	5.43629e-05	-14.167	down
XMW0409	C7H8O2	1-Propanone, 1-(2-furanyl)-	Heterocyclic compound	3194-15-8	108814	122995	97710.9	44453.2	41248.3	42850.7	1.07	0.0107731	0.39012	-1.35801	down
XMW0042	C2H3N3O	3H-1,2,4-Triazol-3-one, 1,2-dihydro-	Heterocyclic compound	930-33-6	4151.35	1775.79	4423.45	35881.1	29310.7	32595.9	1.04737	0.0012016	9.44754	3.23994	up
KMW0205	C7H12O	Cyclohexene, 1-methoxy-	Aromatics	931-57-7	2279.68	1319.38	1537.42	25210.7	22004.4	23607.5	1.07347	0.000764115	13.7882	3.78536	up
XMW0898	C8H12N2	4-Isobutylpyrimidine	Heterocyclic compound	98489-37-3	93567.1	82417.5	81730.6	290431	251651	271041	1.07596	0.00158166	3.15512	1.6577	up
WMW0210	C8H14O2	2-Hexen-1-ol, acetate, (E)-	Ester	2497-18-9	1039.17	859.008	1312.62	7242.79	8059.85	7651.32	1.07308	0.000110636	7.14899	2.83774	up
NMW0013	C7H9N	Benzylamine	Amine	100-46-9	52676.6	47341.5	42990.9	172545	146204	159374	1.07349	0.00189549	3.3433	1.74127	up
XMW1070	C4H6O4	Acetic Acid, (acetyloxy)-	Acid	13831-30-6	7104.67	3569.3	8740.12	69268.5	67295.8	68282.2	1.05578	0.000141877	10.5514	3.39937	up
KMW0234	C10H14	p-Cymene	Aromatics	99-87-6	179239	138145	143246	4.59605e+06	4.2194e+06	4.40772e+06	1.08052	0.000558529	28.7066	4.84331	up
XMW1221	C6H12O2S	Acetic acid, (propylthio)-, methyl ester	Ester	20600-65-1	17973.8	15207	17658.4	9	9	9	1.0817	0.0026549	0.000531085	-10.8788	down
WMW0215	C10H16	.beta.-Ocimene	Terpenoids	13877-91-3	1.26824e+07	8.32508e+06	9.46827e+06	9	9	9	1.08161	0.0160892	8.85951e-07	-20.1063	down
KMW0229	C9H18O2	Hexanoic acid, 1-methylethyl ester	Ester	2311-46-8	121248	79975.1	85069.8	49679.8	44188.8	46934.3	1.00846	0.0628418	0.491814	-1.02382	down
XMW0011	C10H14	Benzene, 1,4-diethyl-	Aromatics	105-05-5	499515	334060	369525	9	9	9	1.08149	0.0153669	2.2442e-05	-15.4434	down
XMW0076	C5H4N2	1H-Pyrrole-3-carbonitrile	Heterocyclic compound	7126-38-7	5.06597e+06	3.40268e+06	3.77504e+06	9	9	9	1.0816	0.0149082	2.20522e-06	-18.7906	down
XMW0523	C5H4N2	1H-Pyrrole-2-carbonitrile	Heterocyclic compound	9513-94-4	7762.29	8993.36	18230.8	182876	188744	185810	1.06329	2.23799e-05	15.9327	3.99392	up
KMW0240	C6H7NO	Ethanone, 1-(1H-pyrrol-2-yl)-	Heterocyclic compound	1072-83-9	87501.3	59959.2	59317.4	1.00952e+06	878417	943967	1.07643	0.00110472	13.6954	3.77562	up
D387	C9H20O	1-Hexanol, 3,5,5-trimethyl-	Alcohol	3452-97-9	53598	37363.5	40226.7	9	9	9	1.08139	0.012843	0.000205811	-12.2464	down
KMW0212	C8H8O	BenzeneacetAldehyde	Aldehyde	122-78-1	8.78218e+06	5.91804e+06	6.59966e+06	9	9	9	1.08162	0.0144817	1.26761e-06	-19.5895	down
XMW0281	C11H24	Decane, 5-methyl-	Hydrocarbons	13151-35-4	9	9	9	200949	176409	188679	1.08177	0.00140688	20964.4	14.3557	up
NMW0021	C6H8N2	2-PyridinemethanAmine	Heterocyclic compound	3731-51-9	43822.6	31819	32879.1	740276	641409	690842	1.07896	0.00161481	19.098	4.25535	up
XMW0490	C10H12	1-Methyl-2-phenylcyclopropane	Aromatics	3145-76-4	29587.4	20579.9	21966.3	281507	250445	265976	1.07695	0.000563796	11.0618	3.46751	up
XMW1203	C5H6O3	2,5-Furandione, dihydro-3-methyl-	Heterocyclic compound	4100-80-5	2315.85	3040.37	2580.36	28780.2	27334.1	28057.2	1.07919	1.53535e-05	10.6055	3.40674	up
NMW0022	C8H10O	Benzenemethanol, .alpha.-methyl-	Alcohol	98-85-1	131755	128201	129229	1.89991e+06	1.64189e+06	1.7709e+06	1.08118	0.00204983	13.6508	3.77092	up
XMW0672	C3H3N3O2	1,2,4-Triazine-3,5(2H,4H)-dione	Heterocyclic compound	461-89-2	4830.42	3946.37	6880.14	30777.3	29133.1	29955.2	1.06374	0.000112721	5.73968	2.52097	up
XMW0767	C9H16O2	2-Furanmethanol, 5-ethenyltetrahydro-.alpha.,5-dimethyl-	Heterocyclic compound	104188-13-8	59819.1	61181.1	65944	664298	706725	685512	1.08135	0.000292917	11.0008	3.45954	up
KMW0276	C8H18O	1-Octanol	Alcohol	111-87-5	8380.4	8316.11	13753.5	112295	125747	119021	1.07174	0.000202044	11.7262	3.55166	up
XMW0186	C8H12O	3,5-Octadien-2-one, (E,E)-	Ketone	30086-02-3	62954.5	87656.7	73506.2	211824	237478	224651	1.06408	0.000130387	3.00715	1.58839	up
KMW0259	C10H16	.gamma.-Terpinene	Terpenoids	99-85-4	798263	545521	585401	1.07468e+07	9.31145e+06	1.00291e+07	1.0776	0.0014211	15.5959	3.9631	up
KMW0260	C7H10O2	2-Cyclopenten-1-one, 2-hydroxy-3,4-dimethyl-	Ketone	21835-00-7	4116.36	2023.53	2958.33	30217.8	27021.1	28619.5	1.06462	6.51423e-05	9.43682	3.2383	up
KMW0263	C7H11NS	Thiazole, 5-ethyl-2,4-dimethyl-	Heterocyclic compound	38205-61-7	4444.54	2296.76	3520.1	31192.4	30519.9	30856.2	1.06622	0.000175043	9.02103	3.17329	up
D306	C10H18O	1,5-Heptadien-4-ol, 3,3,6-trimethyl-	Terpenoids	27644-04-8	1148.63	1483.23	1510.68	9	9	9	1.08124	0.00712002	0.00651773	-7.26142	down
XMW1067	C9H16O2	Butanoic acid, 2-pentenyl ester, (Z)-	Ester	42125-13-3	27994.4	67181.5	39558.8	11122.8	11237	11179.9	1.01038	0.101076	0.248931	-2.00618	down
XMW0528	C8H12S	Thiophene, 2-butyl-	Heterocyclic compound	1455-20-5	11238.1	7919.34	8246.88	136290	128127	132209	1.07824	4.01243e-05	14.4731	3.8553	up
XMW0168	C8H12S	3-Butylthiophene	Heterocyclic compound	34722-01-5	9	9	9	3379.11	2762.53	3070.82	1.08156	0.00336237	341.202	8.41448	up
KMW0291	C10H18O	Linalool	Terpenoids	78-70-6	9.33873e+07	9.10727e+07	9.5382e+07	1.11024e+06	1.73324e+06	1.42174e+06	1.07965	0.000138593	0.0152416	-6.03585	down
KMW0294	C8H16O	2-Octen-1-ol, (E)-	Alcohol	18409-17-1	4759.61	6590.04	6077.32	93022.2	87339.4	90180.8	1.07881	0.00010519	15.5244	3.95646	up
KMW0315	C7H11NO	2-Acetyl-3,4,5,6-tetrahydropyridine	Heterocyclic compound	27300-27-2	8561.31	6703.68	6853.83	82376.9	77422.9	79899.9	1.07952	5.65816e-05	10.8369	3.43788	up
KMW0297	C10H18O2	trans-Linalool oxide (furanoid)	Heterocyclic compound	34995-77-2	219564	423839	223186	81914.3	71279.4	76596.8	1.02324	0.0876693	0.265167	-1.91503	down
KMW0426	C7H5N	Benzonitrile	Nitrogen compounds	100-47-0	255565	171844	197275	13799.2	14490	14144.6	1.07749	0.0159095	0.0679283	-3.87984	down
XMW3734	C7H6O2	2-hydroxy-BenzAldehyde	Aldehyde	90-02-8	379799	258902	289489	2106.12	3128.7	2617.41	1.07915	0.013703	0.00845971	-6.88518	down
KMW0258	C7H8O2	2-methoxy-Phenol	Phenol	90-05-1	30372.4	46006.1	28702.1	9215.78	10775.7	9995.74	1.04893	0.0443764	0.285374	-1.80908	down
XMW0670	C4H5N3	Acetonitrile, 2,2'-iminobis-	Nitrogen compounds	628-87-5	30779	22252.2	26651.4	588207	524863	556535	1.07958	0.000995191	20.9532	4.3891	up
D389	C12H20O2	(S)-3,3,6-Trimethylhepta-1,5-dien-4-yl acetate	Ester	3465-88-1	9	9	9	2.9214e+06	2.60419e+06	2.76279e+06	1.08179	0.00109673	306977	18.2278	up
KMW0319	C10H16O	7-Oxabicyclo[4.1.0]heptane, 1-methyl-4-(1-methylethenyl)-	Terpenoids	1195-92-2	192328	139486	170097	1.87966e+07	1.72763e+07	1.80365e+07	1.08094	0.000594485	107.807	6.7523	up
XMW0717	C9H10O	Ethanone, 1-(2-methylphenyl)-	Ketone	577-16-2	18671.4	12693	17087.2	126580	115515	121047	1.07443	6.6118e-05	7.49494	2.90592	up
XMW1069	C10H18O2	Butanoic acid, 3-hexenyl ester, (E)-	Ester	53398-84-8	45310	32335.5	27674	1.22528e+06	1.11991e+06	1.17259e+06	1.07822	0.000516938	33.401	5.06182	up
XMW0689	C8H10N2O	Ethanone, 1-(3,5-dimethylpyrazinyl)-	Heterocyclic compound	54300-08-2	23671.1	31317.3	19740.1	463283	435508	449396	1.07717	4.74468e-05	18.0411	4.17322	up
KMW0608	C6H14OS	3-Mercaptohexanol	Alcohol	51755-83-0	975067	709266	850034	64225984	58705157	6.14656e+07	1.08079	0.00067315	72.7585	6.18504	up
XMW1057	C4H7NO	Methacrylamide	Amine	79-39-0	9	9	9	33772.2	32640.4	33206.3	1.08181	9.68407e-05	3689.59	11.8492	up
KMW0277	C9H14S	Thiophene, 2-pentyl-	Heterocyclic compound	4861-58-9	23524.5	22238.6	24682.1	503312	473220	488266	1.0815	0.000321948	20.7935	4.37806	up
w48	C10H18O	2H-Pyran, tetrahydro-4-methyl-2-(2-methyl-1-propenyl)-	Terpenoids	16409-43-1	4.03738e+06	3.95401e+06	4.10999e+06	452989	429563	441276	1.08169	0.000115261	0.109395	-3.19238	down
WMW0048	C9H16O	6-Nonenal, (E)-	Aldehyde	2277-20-5	1.11557e+06	815555	976148	7.76221e+07	7.0533e+07	7.40776e+07	1.08083	0.000767767	76.4402	6.25626	up
XMW0676	C9H10O	Ethanone, 1-(3-methylphenyl)-	Ketone	585-74-0	18945.7	15525	15239.9	121620	117094	119357	1.07923	5.79868e-07	7.20312	2.84862	up
XMW0681	C10H16O	6-Octenal, 7-methyl-3-methylene-	Aldehyde	55050-40-3	37028.7	60322.5	58875.4	408888	377152	393020	1.06831	1.21156e-05	7.54711	2.91592	up
XMW0274	C5H7NO3	3-Acetyl-2-oxo-1,3-oxazolidine	Heterocyclic compound	1432-43-5	1569.47	2795.62	1565.02	17182.9	15184.4	16183.6	1.0639	7.82417e-05	8.18718	3.03337	up
XMW0442	C8H12N2	Betahistine	Heterocyclic compound	5638-76-6	197711	143338	123544	4648165	4249047	4448606	1.07823	0.000483908	28.7258	4.84428	up
XMW0452	C10H16	2,4,6-Octatriene, 3,4-dimethyl-	Hydrocarbons	57396-75-5	13606.5	11900.4	14571.2	1.669e+06	1.53866e+06	1.60383e+06	1.08141	0.000556445	120.053	6.90753	up
XMW0411	C8H16O	Cyclohexanol, 2,6-dimethyl-	Alcohol	5337-72-4	92408685	89894045	94252296	3.48228e+06	3.04837e+06	3.26532e+06	1.08155	0.000176871	0.0354214	-4.81923	down
XMW1392	C11H16	2-Methyl-7-exo-vinylbicyclo[4.2.0]oct-1(2)-ene	Hydrocarbons	107914-89-6	9	9	9	960844	884486	922665	1.0818	0.000570265	102518	16.6455	up
XMW0907	C9H12O3	2-(2-Acetoxy-1-propyl)furan, (S)	Heterocyclic compound	60830-70-8	38499.9	35415	42802.9	834040	776421	805231	1.08095	0.000388116	20.6969	4.37134	up
XMW0914	C5H6N2O	Ethanone, 1-(1H-pyrazol-4-yl)-	Heterocyclic compound	25016-16-4	94614.2	71904.9	85893.6	1.86217e+06	1.71221e+06	1.78719e+06	1.08024	0.00049956	21.2412	4.4088	up
KMW0342	C10H18O	Citronellal	Terpenoids	106-23-0	13786.2	16323.5	18796.7	462684	426330	444507	1.07996	0.000485567	27.2668	4.76907	up
KMW0373	C9H10O2	Benzoic acid, ethyl ester	Ester	93-89-0	27956.7	17103.6	23475.4	1.23696e+06	1.13354e+06	1.18525e+06	1.07898	0.000583126	51.8818	5.69716	up
KMW0058	C10H18O2	2H-Pyran-3-ol, 6-ethenyltetrahydro-2,2,6-trimethyl-	Heterocyclic compound	14049-11-7	179445	298736	138874	8.03261e+06	7.56967e+06	7.80114e+06	1.0738	6.71461e-05	37.9276	5.24518	up
XMW0084	C10H16	2,4,6-Octatriene, 2,6-dimethyl-	Terpenoids	673-84-7	153017	99712.2	112776	9	9	9	1.08137	0.0168981	7.38705e-05	-13.7246	down
w32	C9H18O2	Acetic acid, heptyl ester	Ester	112-06-1	9	9	9	55707.8	64252.7	59980.2	1.08179	0.00168749	6664.47	12.7023	up
WMW0100	C9H18O	3-Nonen-1-ol, (E)-	Alcohol	10339-61-4	72151	79783	125763	2.39071e+06	2.24208e+06	2.3164e+06	1.07557	6.6188e-05	25.0244	4.64526	up
XMW1385	C6H7N3	3-Imidazol-1-ylpropanenitrile	Heterocyclic compound	23996-53-4	45851.7	62694.3	20886.4	4.14288e+07	3.94531e+07	4.04409e+07	1.07714	0.00019805	937.344	9.87243	up
XMW1409	C9H13N	(R)-(+)-1-(p-Tolyl)ethylAmine	Amine	4187-38-6	2264.8	1643.77	1477.41	17312.7	15185.2	16248.9	1.07425	0.000511936	9.05067	3.17802	up
NMW0041	C11H18	(E)-4,8-Dimethylnona-1,3,7-triene	Terpenoids	19945-61-0	176270	129561	102106	7.77481e+06	6.75674e+06	7.26577e+06	1.07839	0.00161284	53.433	5.73966	up
KMW0324	C10H16O	Limonene oxide, cis-	Terpenoids	13837-75-7	191762	137257	168859	1.87213e+07	1.72009e+07	1.79611e+07	1.08087	0.000598991	108.226	6.7579	up
XMW1389	C9H12O	2,3-Dimethylanisole	Ether	2944-49-2	48726	35277.8	36714.7	413776	372209	392992	1.07735	0.000357736	9.76633	3.28782	up
KMW0348	C9H14N2	Pyrazine, 3,5-diethyl-2-methyl-	Heterocyclic compound	18138-05-1	9	9	9	36556.8	31860.1	34208.4	1.08175	0.00156799	3800.94	11.8921	up
D76	C10H22O2	Octanal dimethyl acetal	Ether	10022-28-3	1127.37	871.744	454.489	7349.26	7750.9	7550.08	1.05331	4.652e-05	9.23142	3.20655	up
XMW0495	C6H8O2	Dehydromevalonic lactone	Ester	2381-87-5	50729.4	47639.6	49657.1	684336	654485	669411	1.08166	0.00016643	13.5667	3.762	up
XMW1337	C13H28	Nonane, 3-methyl-5-propyl-	Hydrocarbons	31081-18-2	3092.69	2763.5	1408.64	101286	91879.7	96583.1	1.07272	0.000570767	39.8839	5.31773	up
w37	C10H16O	2-Cyclohexene-1-carboxaldehyde, 2,6,6-trimethyl-	Aldehyde	432-24-6	360410	212158	183927	1.84997e+07	1.67477e+07	1.76237e+07	1.07705	0.000748661	69.8895	6.127	up
WMW0042	C10H16O	Bicyclo[3.1.1]heptan-3-ol, 6,6-dimethyl-2-methylene-	Terpenoids	5947-36-4	9	9	9	502995	455853	479424	1.08179	0.000804777	53269.3	15.701	up
NMW0061	C7H7NO2	1-methyl-2-nitro-Benzene	Aromatics	88-72-2	9	9	9	253514	244333	248924	1.08181	0.000113336	27658.2	14.7554	up
D366	C9H16O	3-Octen-2-one, 7-methyl-	Ketone	33046-81-0	7512.82	6274.83	3294.89	247068	240663	243866	1.07289	2.68665e-07	42.8272	5.42045	up
XMW0529	C10H17Cl	Bicyclo[2.2.1]heptane, 2-chloro-1,7,7-trimethyl-, (1R-endo)-	Terpenoids	30462-53-4	218491	119568	103361	1.21485e+07	1.07058e+07	1.14271e+07	1.0761	0.00126669	77.6616	6.27913	up
D440	C10H20O	Cyclohexanol, 1-methyl-4-(1-methylethyl)-, cis-	Terpenoids	3901-95-9	9	9	9	220462	207451	213957	1.0818	0.00030807	23773	14.537	up
NMW0052	C10H14O	2-Methyl-6-methyleneocta-2,7-dien-4-one	Terpenoids	539-70-8	39948.8	39754	68001.9	2.52427e+06	2.34095e+06	2.43261e+06	1.07716	0.000343339	49.4083	5.62668	up
KMW0338	C9H16O	2-Nonenal, (E)-	Aldehyde	18829-56-6	16759.4	22897.3	11560.5	1.79697e+06	1.72499e+06	1.76098e+06	1.07802	0.00010024	103.148	6.68857	up
XMW0913	C10H16O	cis-Chrysanthenol	Terpenoids	55722-60-6	34782.3	58778.4	25388.6	1.85942e+06	1.75389e+06	1.80666e+06	1.07328	8.21097e-05	45.5653	5.50987	up
D112	C9H10O2	Benzeneacetic acid, methyl ester	Ester	101-41-7	100182	102158	75432.4	2.10669e+06	1.93815e+06	2.02242e+06	1.0796	0.000450657	21.8426	4.44907	up
D316	C10H16	Adamantane	Hydrocarbons	281-23-2	9	9	9	32643.4	24438.9	28541.1	1.08154	0.00682014	3171.23	11.6308	up
KMW0232	C9H18O2	Octanoic acid, methyl ester	Ester	111-11-5	7502.82	4889.95	6160.94	799674	731264	765469	1.08041	0.000665041	123.771	6.95153	up
XMW0073	C10H20O2	3-Methylheptyl acetate	Ester	72218-58-7	1.18255e+06	864226	1.03704e+06	9.24478e+07	8.38849e+07	8.81664e+07	1.08087	0.000791979	85.7703	6.42241	up
D406	C10H16O	2,7-Octadien-4-ol, 2-methyl-6-methylene-, (S)-	Terpenoids	35628-00-3	6612.76	9506.71	9186.74	39613.1	36596.3	38104.7	1.0686	1.99398e-05	4.51723	2.17544	up
XMW1156	C9H13N	Cyclopentanecarbonitrile, 3-(1-methylethylidene)-	Nitrogen compounds	89683-72-7	109721	89869.1	121947	9.20035e+06	8.70787e+06	8.95411e+06	1.08089	0.000244142	83.5435	6.38446	up
XMW0607	C9H10O2	Formic acid, 2-phenylethyl ester	Ester	104-62-1	3590.53	5111.29	2884.53	14598.2	14217.8	14408	1.05003	0.00313801	3.73059	1.89941	up
KMW0504	C9H10O	Benzene, 1-ethenyl-4-methoxy-	Aromatics	637-69-4	5537.71	5016.67	4374.47	86305.4	101610	93957.6	1.08027	0.00233947	18.8811	4.23887	up
KMW0669	C6H10O3	Pantolactone	Ester	599-04-2	9	9	9	195315	180056	187686	1.0818	0.000550405	20854	14.348	up
WMW0221	C10H16O	Bicyclo[3.1.0]hexan-3-one, 4-methyl-1-(1-methylethyl)-	Terpenoids	1125-12-8	5.28864e+06	3.87236e+06	4.62457e+06	4.17979e+08	3.76844e+08	3.97411e+08	1.08088	0.000901387	86.4842	6.43436	up
KMW0329	C10H16O	Camphor	Terpenoids	76-22-2	51817	55936	95665.9	4.27056e+06	3.95624e+06	4.1134e+06	1.07689	0.000382771	60.6639	5.92277	up
KMW0340	C10H20O2	2-Octanol, acetate	Ester	2051-50-5	29721.7	20629.5	26509.7	2.94386e+06	2.67575e+06	2.80981e+06	1.08065	0.000762136	109.671	6.77704	up
KMW0266	C5H6S2	2-Thiophenemethanethiol	Heterocyclic compound	6258-63-5	3.69121e+06	3.61644e+06	3.78102e+06	264207	255530	259868	1.08176	0.000184604	0.0703064	-3.8302	down
NMW0035	C8H11N	BenzenAmine, N,N-dimethyl-	Amine	121-69-7	817762	802209	831505	20598.9	19596.9	20097.9	1.08179	0.000110803	0.0245949	-5.3455	down
NMW0036	C6H9NO	1-ethenyl-2-Pyrrolidinone	Heterocyclic compound	88-12-0	6.83083e+06	6.65159e+06	6.95432e+06	667439	618768	643103	1.08161	0.00014449	0.094404	-3.40501	down
WMW0194	C10H16O	Thujone	Terpenoids	546-80-5	444379	262911	220756	2.38411e+07	2.09712e+07	2.24062e+07	1.0768	0.00131419	72.4302	6.17852	up
XMW0726	C10H14O	Benzene, (1-methoxypropyl)-	Aromatics	59588-12-4	3.66997e+07	3.57614e+07	3.7563e+07	733216	694405	713811	1.08178	0.000207926	0.0194633	-5.6831	down
XMW0944	C11H18	Cyclohexene, 2-ethenyl-1,3,3-trimethyl-	Hydrocarbons	5293-90-3	463673	452887	472304	24523.8	23590.1	24056.9	1.08177	0.0001586	0.0519639	-4.26635	down
D401	C10H18O	2-Isopropyl-5-methylhex-2-enal	Aldehyde	35158-25-9	1.99106e+07	1.948e+07	2.02627e+07	1.24312e+06	1.13014e+06	1.18663e+06	1.08162	0.000109604	0.0596765	-4.06669	down
D271	C9H18O2	Propanoic acid, hexyl ester	Ester	2445-76-3	9	9	9	1.54194e+06	1.33552e+06	1.43873e+06	1.08178	0.00171102	159858	17.2864	up
XMW0527	C10H18O	2-Cyclohexen-1-ol, 1-methyl-4-(1-methylethyl)-, cis-	Alcohol	29803-82-5	12061.2	9060.17	6988.75	117678	117468	117573	1.07398	0.000180911	12.5478	3.64936	up
NMW0039	C6H14S2	DiSulfur compounds, dipropyl	Sulfur compounds	629-19-6	4474.79	2460.5	2419.61	57671.7	49972.8	53822.3	1.07123	0.000869928	17.2601	4.10937	up
XMW0531	C10H16O	Bicyclo[3.1.1]heptan-3-one, 2,6,6-trimethyl-, (1.alpha.,2.beta.,5.alpha.)-	Terpenoids	15358-88-0	180295	250318	164563	1.96268e+06	1.84345e+06	1.90306e+06	1.07493	4.8566e-06	9.59245	3.2619	up
WMW0014	C10H16O	Pinocamphone	Terpenoids	547-60-4	27737.9	36425.9	14796.5	6.29552e+06	6.01929e+06	6.15741e+06	1.07689	0.000155281	233.943	7.87001	up
KMW0308	C6H6OS	5-Methyl-2-thiophenecarboxaldehyde	Heterocyclic compound	13679-70-4	33271.9	24359.4	29702.4	3.56612e+06	3.22997e+06	3.39804e+06	1.08098	0.00082238	116.726	6.86698	up
KMW0310	C10H16O	2-Cyclohexen-1-ol, 1-methyl-4-(1-methylethenyl)-, trans-	Alcohol	7212-40-0	200019	145767	174310	1.88445e+07	1.73186e+07	1.80815e+07	1.08097	0.000595944	104.297	6.70456	up
XMW0008	C9H14O	Isophorone	Ketone	78-59-1	1.22394e+06	890720	1.06304e+06	1.04376e+08	9.41224e+07	9.92491e+07	1.08088	0.000897529	93.6989	6.54996	up
XMW0892	C3H6N2O2	Propanediamide	Amine	108-13-4	4189.21	6609.63	4810.49	31622	29750.7	30686.4	1.06931	1.89375e-05	5.8977	2.56015	up
XMW0117	C8H16O	3,4-Dimethylcyclohexanol	Alcohol	5715-23-1	63100.1	43727.1	76822.5	5.6817e+06	5.13058e+06	5.40614e+06	1.07879	0.00085182	88.3116	6.46453	up
XMW0300	C8H10O	Phenol, 3,5-dimethyl-	Phenol	108-68-9	15738.1	16370.5	21524.5	831628	779087	805357	1.08021	0.000310613	45.0482	5.4934	up
D141	C10H20O2	Acetic acid, 2-ethylhexyl ester	Ester	103-09-3	1.18827e+06	865819	1.03965e+06	9.2451e+07	8.3896e+07	8.81735e+07	1.08086	0.000790127	85.502	6.41789	up
NMW0047	C8H10O	Phenol, 2-ethyl-	Phenol	90-00-6	9	9	9	564481	516365	540423	1.0818	0.000659963	60047	15.8738	up
XMW0941	C11H16	exo-7-(trans-1-Propenyl)bicyclo[4.2.0]oct-1(2)-ene	Hydrocarbons	107983-42-6	167477	140399	364348	1.88411e+07	1.74909e+07	1.8166e+07	1.07245	0.000322783	81.0711	6.34112	up
WMW0159	C10H16O	(+)-(1R,4R,5R)-2-(10)-PINEN-4-OL	Terpenoids	13040-03-4	31988.9	30048.1	33219.1	751843	699017	725430	1.0815	0.000462761	22.8467	4.51392	up
NMW0048	C9H13N	DextroamphetAmine	Amine	51-64-9	5644.64	2287.02	4950.53	95154.7	88540.6	91847.6	1.06479	2.8085e-05	21.3894	4.41883	up
XMW0949	C10H18O	1-Decen-3-one	Ketone	56606-79-2	43687.1	37323.3	64015	2.73786e+06	2.54859e+06	2.64322e+06	1.07824	0.000343446	54.6779	5.77288	up
D329	C10H16O	Myroxide	Terpenoids	28977-57-3	190145	187195	211882	6.25189e+06	5.79577e+06	6.02383e+06	1.08139	0.000489983	30.6701	4.93876	up
XMW0814	C2H7N3S	2-Methyl-3-thiosemicarbazide	Others	21185-13-7	53824.5	38642.7	65756.7	2.04509e+06	1.88795e+06	1.96652e+06	1.07778	0.000401214	37.2861	5.22057	up
XMW0925	C10H14O	Camphenone, 6-	Ketone	55659-42-2	9	9	9	924344	824274	874309	1.08179	0.00108992	97145.4	16.5679	up
XMW0253	C12H26	Undecane, 5-methyl-	Hydrocarbons	1632-70-8	9	9	9	2.95905e+06	2.80733e+06	2.88319e+06	1.08181	0.000230675	320354	18.2893	up
XMW0373	C12H26	Undecane, 2-methyl-	Hydrocarbons	7045-71-8	180884	309199	123467	1.92131e+06	1.81964e+06	1.87048e+06	1.05354	0.000100064	9.14583	3.19311	up
QWM0003	C10H16O	2H-Pyran, 3,6-dihydro-4-methyl-2-(2-methyl-1-propenyl)-	Terpenoids	1786-08-9	9	9	9	231110	232660	231885	1.08182	3.72821e-06	25765	14.6531	up
WMW0066	C9H18O	6-Nonen-1-ol, (E)-	Alcohol	31502-19-9	141388	200481	109100	9.34341e+06	8.83324e+06	9.08832e+06	1.07789	0.000178671	60.4587	5.91788	up
XMW0170	C9H10O	BenzAldehyde, 3-ethyl-	Aldehyde	34246-54-3	19845.8	6839.33	9486.15	75403.5	70354.3	72878.9	1.02733	0.00171247	6.04449	2.59562	up
KMW0359	C8H10O	Phenol, 3-ethyl-	Phenol	620-17-7	32524.1	31346	42631.6	1.71249e+06	1.60651e+06	1.6595e+06	1.0803	0.000299999	46.7457	5.54676	up
KMW0360	C10H20O	Levomenthol	Terpenoids	2216-51-5	204331	418678	202770	2.44836e+06	2.31199e+06	2.38017e+06	1.05699	0.000100789	8.64702	3.1122	up
NMW0069	C8H11N	BenzenAmine, 2,5-dimethyl-	Amine	95-78-3	63394.8	35303	55595.9	4.3944e+06	4.13227e+06	4.26334e+06	1.07844	0.000277107	82.8938	6.37319	up
NMW0070	C9H8O2	1,2-Propanedione, 1-phenyl-	Ketone	579-07-7	9064.59	7665.81	5171.79	91197	88817.6	90007.3	1.07291	3.67648e-06	12.3285	3.62393	up
XMW1327	C9H20N2	Propanal, dipropylhydrazone	Amine	34687-35-9	9	9	9	3306.4	3491.95	3399.18	1.08181	0.000249538	377.686	8.56104	up
XMW0721	C10H14O	Benzene, 1-methoxy-4-propyl-	Aromatics	104-45-0	23249.1	17610.6	16905.8	325086	300577	312832	1.07906	0.000241217	16.2466	4.02207	up
XMW0719	C10H14	p-Mentha-1,5,8-triene	Terpenoids	21195-59-5	9	9	9	1.17186e+06	1.01673e+06	1.0943e+06	1.08178	0.00167044	121588	16.8916	up
XMW1381	C10H14	Bicyclo[3.2.1]oct-2-ene, 3-methyl-4-methylene-	Terpenoids	49826-53-1	86355.1	85500.1	90876.2	3.45831e+06	3.26041e+06	3.35936e+06	1.08168	0.000301503	38.3589	5.26149	up
XMW0724	C12H18	Albene	Hydrocarbons	38451-64-8	28786	47870	18016.8	9.55108e+06	9.07601e+06	9.31355e+06	1.07671	0.000206842	295.129	8.2052	up
XMW0175	C9H16O	2-Nonen-4-one	Ketone	32064-72-5	2337692	1692843	2054299	175084070	159204619	1.67144e+08	1.0808	0.000756298	82.407	6.3647	up
XMW0361	C10H16O	5,7-Octadien-4-one, 2,6-dimethyl-, (E)-	Terpenoids	6752-80-3	51961.4	55936	95782.3	4.27062e+06	3.95624e+06	4.11343e+06	1.0769	0.00038282	60.5867	5.92093	up
KMW0273	C10H14	Benzene, 1,2,4,5-tetramethyl-	Aromatics	95-93-2	23105.9	18894	12135	123285	93201.9	108243	1.05521	0.00450853	5.99853	2.58461	up
KMW0287	C9H14O	(Z,Z)-3,6-Nonadienal	Aldehyde	21944-83-2	1.90171e+07	1.85872e+07	1.94404e+07	479965	452865	466415	1.08177	0.000173885	0.0245289	-5.34937	down
XMW1233	C8H16O	3-Cyclopentyl-1-propanol	Alcohol	767-05-5	1.90171e+07	1.85872e+07	1.94404e+07	477118	487454	482286	1.08178	0.000176247	0.0253636	-5.3011	down
XMW0410	C9H18O	1-Nonen-4-ol	Alcohol	35192-73-5	3.62469e+07	3.54853e+07	3.6901e+07	2.26611e+06	2.08755e+06	2.17683e+06	1.08167	0.000115641	0.060115	-4.05613	down
XMW0437	C10H16	1,5-Cyclooctadiene, 1,6-dimethyl-	Hydrocarbons	3760-13-2	1.31301e+07	1.28242e+07	1.34317e+07	252371	266313	259342	1.08175	0.000184322	0.0197539	-5.66172	down
NMW0038	C8H10O	Benzenemethanol, 4-methyl-	Alcohol	589-18-4	1.13958e+07	1.11488e+07	1.16595e+07	280370	262577	271474	1.08176	0.000172599	0.0238106	-5.39225	down
D98	C7H8S	Benzene, (methylthio)-	Sulfur compounds	100-68-5	540851	572727	514671	247997	262194	255096	1.07711	0.00216455	0.470006	-1.08925	down
XMW0909	C10H14O	2,6,6-Trimethylbicyclo[3.2.0]hept-2-en-7-one	Ketone	4613-37-0	9	9	9	1886892	1772555	1.82972e+06	1.08181	0.000325247	203303	17.6333	up
XMW0690	C11H18	Cyclohexene, 2,4-dimethyl-1-(1-methylethenyl)-	Hydrocarbons	56763-60-1	9	9	9	598905	644929	621917	1.08182	0.000456077	69101.9	16.0764	up
NMW0040	C9H10O	Benzyl methyl ketone	Ketone	103-79-7	204952	207667	143332	5.69417e+06	5.24705e+06	5.47061e+06	1.07906	0.000443753	29.5203	4.88364	up
KMW0293	C8H12O	2,4-Octadienal, (E,E)-	Aldehyde	30361-28-5	354416	206352	185252	1.95322e+07	1.687e+07	1.82011e+07	1.07719	0.00175055	73.1928	6.19363	up
XMW1311	C7H6O2	2-Propenal, 3-(2-furanyl)-	Heterocyclic compound	623-30-3	9	9	9	889206	764452	826829	1.08177	0.00189177	91869.9	16.4873	up
D313	C10H20O2	3-Hexene, 1-(1-ethoxyethoxy)-, (Z)-	Aldehyde	28069-74-1	891157	844921	960637	158337	145188	151763	1.08054	0.00180658	0.168831	-2.56635	down
D192	C10H18O	Fenchol	Terpenoids	1632-73-1	331470	187912	156575	1.91799e+07	1.69014e+07	1.80407e+07	1.07633	0.00127591	80.0672	6.32314	up
D392	C7H7NO	Ethanone, 1-(3-pyridinyl)-	Heterocyclic compound	350-03-8	9	9	9	33749.6	29560	31654.8	1.08175	0.00145741	3517.2	11.7802	up
XMW1127	C9H18O2	Formic acid, octyl ester	Ester	112-32-3	9	9	9	553068	474718	513893	1.08177	0.00193156	57099.2	15.8012	up
XMW1318	C8H8O2	2-Methyl-3(2-furyl)acrolein	Heterocyclic compound	874-66-8	1.48267e+07	1.44806e+07	1.51683e+07	474762	449134	461948	1.08176	0.000187443	0.0311596	-5.00418	down
KMW0304	C10H14	1,3,8-p-Menthatriene	Terpenoids	18368-95-1	270837	289125	182440	3.37165e+06	3.08193e+06	3.22679e+06	1.07511	0.000170616	13.0393	3.70479	up
XMW0932	C11H18	3-Nonen-5-yne, 4-ethyl-, (Z)-	Hydrocarbons	74744-26-6	297736	218327	246634	2.7273e+07	2.44864e+07	2.58797e+07	1.08095	0.000975593	101.795	6.66953	up
XMW0918	C10H16O	Isocyclocitral	Aldehyde	1335-66-6	9	9	9	6.8263e+06	6.51152e+06	6.66891e+06	1.08181	0.000185603	740990	19.4991	up
XMW0798	C12H18	Benzene, 1,3-bis(1-methylethyl)-	Aromatics	99-62-7	9	9	9	23057.4	21765.8	22411.6	1.0818	0.000276906	2490.18	11.282	up
XMW0449	C8H14O3	Butanoic acid, anhydride	Others	106-31-0	62980.9	43321.9	58599.8	5.6817e+06	5.13227e+06	5.40698e+06	1.08042	0.000864204	98.3669	6.6201	up
D173	C9H10O	BenzeneacetAldehyde, 4-methyl-	Aldehyde	104-09-6	45165	35145.5	40565	4.01047e+06	3.62879e+06	3.81963e+06	1.08121	0.000842719	94.7991	6.5668	up
XMW1399	C13H28	Decane, 2,5,9-trimethyl-	Hydrocarbons	62108-22-9	29911	19878	25203	1902400	1759541	1.83097e+06	1.08019	0.000492304	73.2466	6.19469	up
NMW0043	C10H14O	Bicyclo[3.1.1]hept-2-en-6-one, 2,7,7-trimethyl-	Terpenoids	473-06-3	169890	127665	148314	1.47362e+07	1.33143e+07	1.40252e+07	1.08105	0.000865786	94.3677	6.56022	up
KMW0312	C10H14O	Furan, 3-(4-methyl-3-pentenyl)-	Terpenoids	539-52-6	3.50302e+07	3.42324e+07	3.58176e+07	1.06144e+06	1.03861e+06	1.05003e+06	1.08179	0.000180843	0.0299778	-5.05996	down
NMW0044	C8H11N	BenzenAmine, N-ethyl-	Amine	103-69-5	13847.6	19154.8	9297.99	974117	885661	929889	1.07654	0.000680121	65.9489	6.04328	up
XMW0780	C10H14	2,6-Dimethyl-1,3,5,7-octatetraene, E,E-	Terpenoids	460-01-5	9	9	9	3.19747e+07	2.87278e+07	3.03512e+07	1.0818	0.000952344	3.37236e+06	21.6853	up
KMW0320	C9H16O2	Cyclohexanecarboxylic acid, ethyl ester	Ester	3289-28-9	39959.8	39719.2	69105.2	2.47726e+06	2.29937e+06	2.38832e+06	1.07682	0.000318108	48.1566	5.58966	up
WMW0015	C10H18O	Terpinen-4-ol	Terpenoids	562-74-3	244065	170887	151295	7.04127e+06	6.41727e+06	6.72927e+06	1.07844	0.000583209	35.652	5.15591	up
KMW0325	C10H18O	3-Cyclohexen-1-ol, 1-methyl-4-(1-methylethyl)-	Terpenoids	586-82-3	119631	122098	190119	7.19154e+06	6.66845e+06	6.92999e+06	1.07835	0.000377989	48.1419	5.58922	up
XMW0068	C11H18O	2,7-Nonadien-5-one, 4,6-dimethyl-	Ketone	74630-80-1	276712	253119	198026	1.4777e+06	1.37628e+06	1.42699e+06	1.07497	9.38255e-06	5.88162	2.55621	up
D167	C10H18O	1,7,7-Trimethylbicyclo[2.2.1]heptan-2-ol	Terpenoids	10385-78-1	86978.2	65191.7	74222.3	1.75409e+06	1.62623e+06	1.69016e+06	1.08024	0.000374083	22.3969	4.48523	up
XMW0826	C7H6N2O	3-Methylisoxazolo[4,5-b]pyridine	Heterocyclic compound	83988-39-0	120988	110524	164242	3.33947e+06	3.10103e+06	3.22025e+06	1.07859	0.000259847	24.411	4.60946	up
XMW0599	C7H10O3	2,2,6-Trimethyl-4H-1,3-dioxin-4-one	Heterocyclic compound	5394-63-8	276712	253119	198026	1.47978e+06	1.37628e+06	1.42803e+06	1.07496	1.05928e-05	5.8859	2.55726	up
XMW0362	C8H14O2	2H-Pyran-2-one, tetrahydro-4,6,6-trimethyl-	Heterocyclic compound	20628-36-8	9	9	9	11201.5	10516	10858.8	1.08179	0.000332518	1206.53	10.2366	up
KMW0327	C10H16O	Limonene oxide, trans-	Terpenoids	4959-35-7	37357.3	34503.1	40438.9	819175	763684	791429	1.08119	0.000394295	21.1425	4.40207	up
KMW0334	C10H18O	Cyclohexanone, 5-methyl-2-(1-methylethyl)-	Terpenoids	10458-14-7	6770.8	6242.58	7768.55	1.54709e+06	1.45508e+06	1.50109e+06	1.08145	0.000314706	216.691	7.7595	up
XMW0927	C9H12O2	2,6,6-Trimethyl-2-cyclohexene-1,4-dione	Ketone	1125-21-9	9	9	9	221336	239077	230207	1.08182	0.000494596	25578.6	14.6426	up
NMW0050	C8H7N	Benzyl nitrile	Nitrogen compounds	140-29-4	31685.5	39210.3	32515.2	791713	745273	768493	1.08068	0.000226383	22.2943	4.4786	up
D342	C10H16	2,4,6-Octatriene, 2,6-dimethyl-, (E,E)-	Terpenoids	3016-19-1	95080.6	68948	75150.8	551405	494176	522790	1.07582	0.00021029	6.5573	2.7131	up
XMW0657	C8H7NO	Benzoxazole, 2-methyl-	Heterocyclic compound	95-21-6	5008.32	3540.81	6849.41	236957	218771	227864	1.07634	0.000382116	44.3933	5.47227	up
D323	C6H8N2S	Pyrazine, 2-methyl-3-(methylthio)-	Heterocyclic compound	2882-20-4	1321.37	658.881	991.311	33216	31315	32265.5	1.07489	7.24096e-05	32.5743	5.02566	up
XMW1226	C10H20O2	Hexanoic acid, 2-methylpropyl ester	Ester	105-79-3	9	9	9	41700.8	36490.2	39095.5	1.08175	0.00147765	4343.95	12.0848	up
XMW0654	C10H16O	Ethanone, 1-(1,4-dimethyl-3-cyclohexen-1-yl)-	Terpenoids	43219-68-7	45811.8	34092.5	39564.1	537561	541212	539386	1.07964	9.89495e-06	13.5447	3.75965	up
NMW0053	C9H8O	2-Phenylpropenal	Aromatics	4432-63-7	1339.3	1092.77	1074.19	38545.8	33571.7	36058.8	1.08066	0.00163559	30.8524	4.94731	up
XMW0801	C12H18	Cyclohexene, 3,4-diethenyl-1,6-dimethyl-	Hydrocarbons	61142-14-1	32376.5	33357.2	117711	2.38019e+06	2.1738e+06	2.27699e+06	1.05533	8.41523e-05	37.2373	5.21868	up
KMW0343	C9H16O	2-Nonenal	Aldehyde	2463-53-8	15628.4	16985.6	8173.24	6.37614e+06	6.07728e+06	6.22671e+06	1.0789	0.000190145	457.99	8.83917	up
KMW0345	C9H14O	2,6-Nonadienal, (E,Z)-	Aldehyde	557-48-2	9	9	9	450030	409282	429656	1.08179	0.00074871	47739.6	15.5429	up
D412	C10H16O	5,7-Octadien-4-one, 2,6-dimethyl-, (Z)-	Terpenoids	3588-18-9	94867.7	71904.9	85535.8	1.86269e+06	1.71459e+06	1.78864e+06	1.08023	0.00048059	21.2673	4.41056	up
NMW0058	C10H12	Naphthalene, 1,2,3,4-tetrahydro-	Aromatics	119-64-2	3089.36	4137.96	2576.67	199279	192729	196004	1.07939	4.06445e-05	59.9769	5.90634	up
NMW0059	C5H6N2	4-Aminopyridine	Heterocyclic compound	504-24-5	9	9	9	2.06345e+06	1.95386e+06	2.00866e+06	1.08181	0.000247971	223184	17.7679	up
KMW0362	C10H18O	Isoborneol	Terpenoids	124-76-5	94614.2	71904.9	85893.6	1.79657e+06	1.66296e+06	1.72977e+06	1.08023	0.000393937	20.5588	4.36168	up
KMW0351	C9H14N2	Pyrazine, 2,3-diethyl-5-methyl-	Heterocyclic compound	18138-04-0	2550.62	2232.19	3930.92	822752	716588	769670	1.0796	0.00158942	264.985	8.04977	up
XMW0679	C8H16O4	AcetAldehyde, tetramer	Aldehyde	108-62-3	9	9	9	161163	153940	157551	1.08181	0.000175114	17505.7	14.0955	up
XMW1137	C10H16O	Ethanone, 1-(1,3-dimethyl-3-cyclohexen-1-yl)-	Ketone	51733-68-7	40244.8	59310.9	25305.7	1.85739e+06	1.74997e+06	1.80368e+06	1.07301	9.21567e-05	43.3364	5.43751	up
KMW0350	C9H10O2	Acetic acid, phenylmethyl ester	Ester	140-11-4	10136.8	12922.2	14534.2	6.19162e+06	5.65214e+06	5.92188e+06	1.08103	0.000693303	472.575	8.8844	up
NMW0064	C10H14O	Benzofuran, 4,5,6,7-tetrahydro-3,6-dimethyl-	Terpenoids	494-90-6	12448.7	17395	30660.8	948501	892346	920424	1.07169	8.52621e-05	45.6374	5.51214	up
KMW0408	C10H14O	Benzenemethanol, .alpha.,.alpha.,4-trimethyl-	Terpenoids	1197-01-9	1528.39	1109.23	1443.06	25428.2	22391.9	23910	1.07895	0.00123669	17.578	4.1357	up
D439	C10H20O	Cyclohexanol, 1-methyl-4-(1-methylethyl)-, trans-	Terpenoids	3901-93-7	263805	420211	199668	2.49218e+06	2.35437e+06	2.42327e+06	1.06042	5.01404e-05	8.22671	3.04032	up
D365	C8H10N2O	2-Acetyl-3-ethylpyrazine	Heterocyclic compound	32974-92-8	6010.63	5082.75	6085.56	273205	249166	261186	1.0812	0.000720118	45.6115	5.51132	up
WMW0197	C10H16O2	Lilac Aldehyde D	Aldehyde	53447-47-5	180240	250318	164505	2.00423e+06	1.89194e+06	1.94808e+06	1.07508	2.96846e-06	9.82123	3.2959	up
WMW0065	C9H18O	(6Z)-Nonen-1-ol	Alcohol	35854-86-5	139536	191718	109100	9.34341e+06	8.83354e+06	9.08848e+06	1.07848	0.000192562	61.9172	5.95227	up
KMW0361	C9H10O	BenzAldehyde, 4-ethyl-	Aldehyde	4748-78-1	7014	4830	5108	30608.2	28369	29488.6	1.07135	1.49863e-05	5.2186	2.38366	up
XMW0304	C10H18O2	Butanoic acid, 5-hexenyl ester	Ester	108058-75-9	243519	175070	153291	7007752	6388870	6698311	1.07868	0.000587987	35.1384	5.13498	up
D307	C10H18O	Bicyclo[3.1.1]heptan-3-ol, 2,6,6-trimethyl-, (1.alpha.,2.beta.,3.alpha.,5.alpha.)-	Terpenoids	27779-29-9	15525.2	7788.72	7120.22	380946	336306	358626	1.07208	0.000904319	35.3511	5.14368	up
WMW0011	C10H16O	Cyclohexanone, 5-methyl-2-(1-methylethenyl)-	Terpenoids	529-00-0	31196.5	22238.7	26211.5	850073	780381	815227	1.08003	0.000541656	30.7066	4.94048	up
WMW0041	C10H16O	Isopinocarveol	Terpenoids	6712-79-4	23951.4	17747.2	14664.6	580046	530882	555464	1.07809	0.000469058	29.5652	4.88583	up
KMW0368	C7H8O2S	Ethanethioic acid, S-(2-furanylmethyl) ester	Heterocyclic compound	13678-68-7	70628.7	60614.9	71055.7	5.08084e+06	4.78243e+06	4.93163e+06	1.08146	0.000307408	73.1338	6.19247	up
XMW0660	C8H14O2	2-Octenoic Acid	Acid	1470-50-4	9	9	9	34772.6	32197.8	33485.2	1.08179	0.000492634	3720.58	11.8613	up
D348	C10H18O	Cyclobutaneethanol, 1-methyl-2-(1-methylethenyl)-, cis-	Alcohol	30820-22-5	37509	28642	24425.4	1.05398e+06	962097	1.00804e+06	1.07912	0.000585817	33.3874	5.06123	up
XMW0487	C6H6N2O2	2-Picoline, 6-nitro-	Heterocyclic compound	18368-61-1	41917.1	32656.8	27841.2	1.03372e+06	941417	987568	1.07915	0.00060469	28.9284	4.85442	up
XMW0241	C13H28	Undecane, 4,8-dimethyl-	Hydrocarbons	17301-33-6	9	9	9	6491.91	4729.82	5610.86	1.08132	0.00814481	623.429	9.28408	up
KMW0374	C10H18O	4-Hexen-1-ol, 5-methyl-2-(1-methylethenyl)-, (R)-	Terpenoids	498-16-8	236704	349484	177215	2.76794e+07	2.61499e+07	2.69146e+07	1.07804	0.000232084	105.769	6.72477	up
KMW0380	C9H14N2O	Pyrazine, 2-methoxy-3-(2-methylpropyl)-	Heterocyclic compound	24683-00-9	2823.35	2649	1709.78	22742.3	20730.1	21736.2	1.07108	4.99928e-05	9.07928	3.18258	up
KMW0376	C9H20O	2-Nonanol	Alcohol	628-99-9	725685	684885	764553	188415	176330	182372	1.08034	0.00145831	0.251534	-1.99117	down
XMW0612	C13H28	Undecane, 4,7-dimethyl-	Hydrocarbons	17301-32-5	6272.44	5675.28	3784	137032	131001	134017	1.07715	1.80382e-05	25.5566	4.67563	up
KMW0431	C8H10N2	5H-5-Methyl-6,7-dihydrocyclopentapyrazine	Heterocyclic compound	23747-48-0	49980.6	41934.8	106590	5.23674e+06	4.84743e+06	5.04208e+06	1.0726	0.000350737	76.2007	6.25173	up
KMW0496	C8H16O3	Hexanoic acid, 3-hydroxy-, ethyl ester	Ester	2305-25-1	51951.1	51242.4	72735.5	341788	309767	325778	1.07157	3.65937e-05	5.55527	2.47386	up
KMW0531	C9H16O	3,6-Nonadien-1-ol, (E,Z)-	Alcohol	56805-23-3	9	9	9	1.1438e+06	1.04658e+06	1.09519e+06	1.0818	0.000656033	121688	16.8928	up
KMW0543	C10H18O2	(3R,6R)-2,2,6-Trimethyl-6-vinyltetrahydro-2H-pyran-3-ol	Heterocyclic compound	14009-71-3	180573	299319	139533	8.05685e+06	7.59231e+06	7.82458e+06	1.07386	6.81532e-05	37.896	5.24397	up
KMW0284	C8H10O	Phenylethyl Alcohol	Alcohol	60-12-8	9	9	9	1.04805e+06	884312	966183	1.08176	0.00238489	107354	16.712	up
NMW0093	C10H14O	D-Verbenone	Terpenoids	18309-32-5	17785.4	13247.9	17586.5	86070.1	81637	83853.6	1.0744	5.11598e-06	5.17404	2.37129	up
XMW0943	C13H28	Undecane, 3,5-dimethyl-	Hydrocarbons	17312-81-1	19925.1	14638.9	8976.24	9	9	9	1.07951	0.0443661	0.000620116	-10.6552	down
D81	C9H12O3	2-Furanpropanoic acid, ethyl ester	Heterocyclic compound	10031-90-0	2764595	2171300	1.88155e+06	1125705	1061686	1.0937e+06	1.03091	0.0446937	0.481278	-1.05506	down
XMW0239	C13H28	Decane, 3-ethyl-3-methyl-	Hydrocarbons	17312-66-2	16888.7	14161.6	18214.3	1.16979e+06	1.02477e+06	1.09728e+06	1.08092	0.00148532	66.8196	6.0622	up
XMW1401	C11H20O2	n-Valeric acid cis-3-hexenyl ester	Ester	35852-46-1	10129.3	11211.4	17257	647123	572382	609752	1.07762	0.00117788	47.393	5.5666	up
XMW0586	C13H28	Dodecane, 5-methyl-	Hydrocarbons	17453-93-9	917963	666187	756715	2012.61	2656.71	2334.66	1.08073	0.00883912	0.00299205	-8.38465	down
NMW0074	C10H16O	Bicyclo[3.1.1]hept-2-ene-2-methanol, 6,6-dimethyl-	Terpenoids	515-00-4	1.07026e+06	938009	817275	3.69186e+06	3.37972e+06	3.53579e+06	1.07388	3.31093e-05	3.7541	1.90847	up
KMW0434	C10H16O	2,6,6-trimethyl-1-Cyclohexene-1-carboxaldehyde	Terpenoids	432-25-7	32431.5	22246.8	19316.4	67941.7	59803.4	63872.6	1.0291	0.00252728	2.58962	1.37274	up
D188	C5H5N3O	Pyrazinamide	Heterocyclic compound	98-96-4	2.46262e+08	1.75651e+08	2.00333e+08	60075	392207	226141	1.06791	0.00982332	0.00109028	-9.84108	down
XMW1295	C10H24N2	1,6-HexanediAmine, N,N,N',N'-tetramethyl-	Amine	111-18-2	2732	4088	1554.45	9	9	9	1.07646	0.0627593	0.00322409	-8.27689	down
KMW0424	C11H22O2	Butanoic acid, 2-methyl-, hexyl ester	Ester	10032-15-2	638.724	984.506	1793.21	759840	641107	700473	1.0769	0.00239146	615.09	9.26465	up
XMW0740	C7H7N3	3-Methyl-pyrrolo(2,3-b)pyrazine	Heterocyclic compound	20321-99-7	1524.7	1345.84	2027	7084.48	6512.75	6798.62	1.06598	5.39424e-05	4.16451	2.05815	up
XMW0441	C2H2ClN3	1H-1,2,4-Triazole, 3-chloro-	Heterocyclic compound	6818-99-1	9	9	9	64149.7	53243.9	58696.8	1.08171	0.00286524	6521.87	12.6711	up
XMW0727	C9H10O	BenzAldehyde, 2,5-dimethyl-	Aldehyde	5779-94-2	9	9	9	326296	304348	315322	1.0818	0.000403504	35035.8	15.0965	up
NMW0095	C8H6N2	Quinoxaline	Heterocyclic compound	91-19-0	9	9	9	3872.38	3992.68	3932.53	1.08182	7.83303e-05	436.948	8.77132	up
XMW1465	C10H16O2	7-Oxabicyclo[4.1.0]heptan-2-one, 6-methyl-3-(1-methylethyl)-	Ketone	5286-38-4	105916456	77349607	86219980	20827	191202	106014	1.06261	0.00873455	0.00118019	-9.72677	down
D110	C10H16O2	Bicyclo[3.1.1]heptan-3-one, 2-hydroxy-2,6,6-trimethyl-	Ketone	10136-65-9	88143109	63353545	71746643	15424.5	130161	72792.7	1.06477	0.00945109	0.000978207	-9.99757	down
KMW0449	C11H18O2	Bicyclo[2.2.1]heptan-2-ol, 1,7,7-trimethyl-, formate, endo-	Ester	7492-41-3	7861.1	6277.04	11105.5	92614	103070	97842	1.07186	0.000165207	11.6277	3.53949	up
WMW0083	C10H20O	2-Decen-1-ol, (E)-	Alcohol	18409-18-2	2553004	1872818	2092293	9	9	9	1.08167	0.00840259	4.1423e-06	-17.8811	down
D134	C7H12O5	Glycerol 1,2-diacetate	Ester	102-62-5	9	9	9	28061	22983	25522	1.08167	0.00328501	2835.78	11.4695	up
XMW0933	C12H18O2	Bicyclo[3.1.1]hept-2-en-6-ol, 2,7,7-trimethyl-, acetate, [1S-(1.alpha.,5.alpha.,6.beta.)]-	Ester	50764-55-1	32227.1	23318.2	32771.1	107554	95833.1	101693	1.06375	9.93949e-05	3.4544	1.78844	up
XMW0089	C10H18O	4-Decenal, (E)-	Aldehyde	65405-70-1	18367.2	18321.3	13239.1	2.14917e+06	1.85981e+06	2.00449e+06	1.08059	0.00175454	120.444	6.91221	up
NMW0083	C7H7NO2	Benzene, 1-methyl-4-nitro-	Aromatics	99-99-0	87382	115483	58121.9	9	9	9	1.08075	0.0343837	0.000103453	-13.2387	down
NMW0071	C10H18O	L-.alpha.-Terpineol	Terpenoids	10482-56-1	4510655	3968039	3448155	1675347	1562848	1.6191e+06	1.06448	0.0156887	0.407257	-1.29599	down
XMW0269	C10H18O3	2-Methylbutanoic anhydride	Others	1468-39-9	19875.9	34670.5	33008.3	1.30618e+06	1.10377e+06	1.20497e+06	1.07634	0.00233157	41.2875	5.36763	up
NMW0075	C10H18O	Cyclohexanol, 1-methyl-4-(1-methylethylidene)-	Terpenoids	586-81-2	5.15155e+06	4.59293e+06	3.90594e+06	1.85625e+06	1.7599e+06	1.80807e+06	1.06467	0.0163658	0.397366	-1.33146	down
XMW0246	C10H16O2	OxiranecarboxAldehyde, 3-methyl-3-(4-methyl-3-pentenyl)-	Aldehyde	16996-12-6	7918.9	6833	7196.55	211575	183597	197586	1.08111	0.00177181	27.0068	4.75525	up
D245	C10H14O	4-Phenyl-2-butanol	Alcohol	2344-70-9	9035.94	11194.9	11364.3	34675.3	30944.2	32809.7	1.07062	0.000152874	3.11532	1.63938	up
XMW0534	C10H14O	Bicyclo[3.1.1]hept-3-en-2-one, 4,6,6-trimethyl-, (1S)-	Terpenoids	1196-01-6	18308.1	24717.2	16570.4	513178	491530	502354	1.07881	2.224e-05	25.288	4.66038	up
XMW0711	C7H7NO	Formamide, N-phenyl-	Amine	103-70-8	36036.3	23255.1	29165.6	334521	300705	317613	1.0756	0.00030715	10.7718	3.42918	up
KMW0385	C10H18O	2-methyl-5-(1-methylethenyl)-Cyclohexanol	Terpenoids	619-01-2	5.15026e+06	4.58833e+06	3.90361e+06	1.87576e+06	1.7599e+06	1.81783e+06	1.06418	0.0163376	0.399751	-1.32283	down
WMW0024	C10H14O	Verbenone	Terpenoids	80-57-9	18030.9	22302	15090.5	521839	499150	510495	1.07933	4.63355e-05	27.6324	4.78829	up
XMW0296	C10H20O2	Acetic acid, octyl ester	Ester	112-14-1	1606.09	900.889	1104.06	11833.6	10454.9	11144.2	1.06952	0.000189976	9.25848	3.21078	up
XMW0367	C13H28	Undecane, 2,4-dimethyl-	Hydrocarbons	17312-80-0	5679.52	11125	2779.15	46632.1	40210.2	43421.2	1.00681	0.000407486	6.65164	2.73371	up
KMW0377	C11H20O2	cis-3-Hexenyl-.alpha.-methylbutyrate	Ester	53398-85-9	7539.55	6523.37	8927.29	470573	402620	436596	1.08039	0.00206212	56.9716	5.83217	up
XMW0911	C10H18O2	1-Octen-1-ol, acetate	Alcohol	77149-68-9	727.507	789.247	650.184	62248.2	56279.6	59263.9	1.08137	0.000860181	82.0474	6.35839	up
KMW0381	C10H20O2	Hexanoic acid, butyl ester	Ester	626-82-4	3657.58	7545.13	7739.16	624889	529064	576977	1.07507	0.00229596	91.3812	6.51383	up
D332	C9H15N	2-Nonenenitrile	Nitrogen compounds	29127-83-1	343012	307059	258210	849178	786101	817640	1.06659	0.000127143	2.70062	1.43329	up
XMW1092	C10H12O2	spiro[3-oxatricyclo[3.3.1.02,4]nonane-8,1'-cyclopropane]-6-one	Ketone	109637-57-2	1.07306e+06	940920	820308	3.71089e+06	3.39565e+06	3.55327e+06	1.07395	3.42205e-05	3.76102	1.91112	up
XMW0408	C8H14O2	1-Methylcyclohexylcarboxylic Acid	Acid	1123-25-7	10739.8	15732.8	7229.96	9	9	9	1.07961	0.04506	0.000801125	-10.2857	down
NMW0080	C8H18O2	1,2-Octanediol	Alcohol	1117-86-8	9953.74	14907.4	7220.9	9	9	9	1.07987	0.0415801	0.000841591	-10.2146	down
XMW0926	C10H12O	Ethanone, 1-(2,4-dimethylphenyl)-	Ketone	89-74-7	8471	6659	9282.72	212700	214260	213480	1.07985	7.10913e-08	26.2339	4.71336	up
KMW0452	C10H12O	4-(1-methylethyl)-Benzaldehyde	Terpenoids	122-03-2	8953.15	6924.38	8930.28	210528	212555	211542	1.08037	3.07483e-09	25.5816	4.67704	up
XMW0526	C10H16O	AcetAldehyde, (3,3-dimethylcyclohexylidene)-, (Z)-	Aldehyde	26532-24-1	17644.3	8650.79	15345.4	191682	169420	180551	1.06674	0.000332193	13.0079	3.70131	up
KMW0372	C10H20O2	Butanoic acid, hexyl ester	Ester	2639-63-6	15947.7	14338.8	11890.5	9	9	9	1.08147	0.00697451	0.000640158	-10.6093	down
XMW0243	C13H28	Undecane, 2,5-dimethyl-	Hydrocarbons	17301-22-3	15686	12418.8	6502.37	9	9	9	1.07868	0.0502984	0.000780185	-10.3239	down
XMW0588	C7H13N3O	1,3,5-Triazaadamantan-7-ol	Heterocyclic compound	130267-10-6	5386.23	3138.35	2774.92	118778	109263	114021	1.07453	0.000240204	30.2723	4.91993	up
XMW1142	C10H14O	5-propan-2-ylbicyclo[3.1.0]hex-2-ene-2-carbAldehyde	Aldehyde	57129-54-1	35242	65545.8	22167.8	493653	464783	479218	1.05058	3.32863e-05	11.6925	3.54751	up
XMW0492	C6H9NO2	2,5-Pyrrolidinedione, 1-ethyl-	Heterocyclic compound	2314-78-5	4368.61	7516.93	7692.2	611658	514989	563323	1.07765	0.0024713	86.321	6.43164	up
NMW0072	C10H18O	(1.alpha.,2.beta.,5.alpha.)-2-methyl-5-(1-methylethenyl)-Cyclohexanol	Terpenoids	38049-26-2	5.15261e+06	4.5895e+06	3.90597e+06	1.94325e+06	1.82818e+06	1.88571e+06	1.06284	0.0171544	0.414501	-1.27055	down
XMW0835	C12H18	Benzene, 1-methyl-2-(1-ethylpropyl)-	Aromatics	54410-74-1	15196.5	16849.8	17281.8	145725	142998	144361	1.08099	4.46039e-08	8.77968	3.13417	up
XMW0773	C4H9NO5	Ethanol, 2-(2-hydroxyethoxy)-, 1-nitrate	Alcohol	20633-16-3	69812	53871.8	47953.2	14769.7	14549.3	14659.5	1.06704	0.0227222	0.25623	-1.96449	down
XMW0122	C10H18O	Cyclohexanol, 2-methyl-3-(1-methylethenyl)-, (1.alpha.,2.alpha.,3.alpha.)-	Alcohol	54244-81-4	210381	152772	110380	48683.9	38267.3	43475.6	1.03122	0.0571732	0.275433	-1.86022	down
XMW1457	C8H8O2	BenzAldehyde, 3-methoxy-	Aldehyde	591-31-1	4722961	4244955	3638604	1677835	1586272	1.63205e+06	1.06714	0.0140811	0.388383	-1.36445	down
KMW0388	C10H16O	Carveol	Terpenoids	99-48-9	13087.8	12378.2	13575.1	66934.9	59019.3	62977.1	1.07994	0.00170721	4.83929	2.27479	up
XMW1074	C10H18O	1-Cyclopentene-1-methanol, 2-methyl-5-(1-methylethyl)-	Alcohol	80113-82-2	103771	71780	112720	263106	279257	271181	1.04589	0.00204466	2.82215	1.49679	up
KMW0406	C12H26	Dodecane	Hydrocarbons	112-40-3	43305.2	21639.8	20927.2	1.50122e+06	1.26143e+06	1.38132e+06	1.07394	0.00237707	48.2574	5.59268	up
XMW0725	C10H16O	(-)-cis-Isopiperitenol	Terpenoids	96555-02-1	10599.5	7361.6	4739.18	121362	131786	126574	1.06814	3.60194e-05	16.7276	4.06416	up
XMW0794	C12H18	1,5-Cyclooctadiene, 3-(1-methyl-2-propenyl)-	Hydrocarbons	16538-88-8	37527.1	54245.9	25610.3	9	9	9	1.08032	0.0422374	0.000230016	-12.086	down
NMW0082	C10H16O	(-)-trans-Isopiperitenol	Terpenoids	74410-00-7	9009.25	7871.96	5427.29	125837	112815	119326	1.07544	0.00052781	16.0468	4.00421	up
NMW0084	C10H16O	(-)-Myrtenol	Terpenoids	19894-97-4	38599.4	54901.3	25253.3	6325.62	6709.43	6517.52	1.04765	0.0610928	0.164648	-2.60255	down
D287	C10H16O	Cyclopentanone, 2-(3-methyl-2-buten-1-yl)-	Ketone	2520-60-7	11710.1	7081.11	4741.85	122409	107962	115186	1.06287	0.000216866	14.6839	3.87616	up
XMW1326	C7H11NO2	2,6-Piperidinedione, 3-ethyl-	Heterocyclic compound	25115-69-9	1827	875.849	1437.94	8933.37	7872.33	8402.85	1.0528	7.51389e-05	6.08786	2.60594	up
XMW1379	C12H20	Cyclooctane, 1,5-dimethyl-2,6-bis(methylene)-	Hydrocarbons	74301-13-6	9796.71	10778.1	5092.85	71796.6	67740.2	69768.4	1.0569	2.77395e-05	8.15444	3.02759	up
XMW0491	C3H7N5	3-Methyl-4,5-diamino-1,2,4(4H)-triazole	Heterocyclic compound	21532-07-0	2328.93	1026.62	1455.34	6601.44	7394.78	6998.11	1.03297	0.000800854	4.36391	2.12562	up
D113	C10H14O2	Benzene, (2,2-dimethoxyethyl)-	Aromatics	101-48-4	9	9	9	16856	15077.8	15966.9	1.08176	0.00103314	1774.1	10.7929	up
WMW0216	C12H20O2	Fenchyl acetate	Ester	13851-11-1	9	9	9	206102	183032	194567	1.08178	0.00116964	21618.6	14.4	up
XMW1064	C8H12N2	1,4-Methano-1H-Cyclopropa[d]pyridazine, 4,4a,5,5a-tetrahydro-6,6-dimethyl-, (1.alpha.,4.alpha.,4a.alpha.,5a.alpha.)-	Heterocyclic compound	109746-10-3	140417	93348.5	106039	695589	624276	659933	1.07154	6.66721e-05	5.82629	2.54258	up
NMW0092	C10H18O	(+)-neodihydrocarveol	Terpenoids	18675-33-7	33142	24484.8	26193.8	191855	176159	184007	1.07657	4.82203e-05	6.58575	2.71935	up
XMW1087	C7H10O4	2(3H)-Furanone, 5-(acetyloxy)dihydro-5-methyl-	Heterocyclic compound	57681-51-3	9	9	9	52213.1	46368.9	49291	1.08177	0.00116986	5476.78	12.4191	up
XMW0545	C10H15N	Benzenemethanamine, N-(1-methylethyl)-	Amine	102-97-6	70743	56930.7	63651	290365	254234	272300	1.07637	0.000812487	4.2697	2.09413	up
XMW0238	C13H28	Undecane, 4,4-dimethyl-	Hydrocarbons	17312-68-4	13374.2	12728.2	13298.5	537554	461243	499399	1.08141	0.00204449	38.0243	5.24885	up
D290	C10H12O	2-Butanone, 4-phenyl-	Ketone	2550-26-7	6069.11	4999.7	6244.59	160273	162488	161381	1.08089	6.46752e-08	27.9634	4.80547	up
KMW0421	C8H8O3	Methyl salicylate	Ester	119-36-8	62488.9	57023.5	45952.9	18854.8	19157.2	19006	1.06566	0.0176023	0.344592	-1.53704	down
XMW1083	C10H20O2	7-Octene-2,6-diol, 2,6-dimethyl-	Alcohol	29210-77-3	7398.46	6225.87	8185.58	583059	483488	533273	1.08067	0.00296344	73.3529	6.19678	up
D359	C10H16N2	Pyrazine, 2,3-dimethyl-5-(1-methylpropyl)-	Heterocyclic compound	32263-00-6	64664	45944	50670	7289	5741	6515	1.07446	0.013429	0.121188	-3.04468	down
KMW0428	C10H16O	2-Cyclohexen-1-one, 3-methyl-6-(1-methylethyl)-	Terpenoids	89-81-6	2.01471e+07	1.42306e+07	1.6266e+07	9	9	9	1.08168	0.0104038	5.33137e-07	-20.839	down
KMW0429	C11H18O2	Isobornyl formate	Ester	1200-67-5	55114	35258	40914	15975	14547.8	15261.4	1.04693	0.0397794	0.348737	-1.51979	down
KMW0441	C10H12O2	Benzeneacetic acid, ethyl ester	Ester	101-97-3	9	9	9	947672	864185	905929	1.0818	0.000706989	100659	16.6191	up
KMW0442	C9H12O	3-Phenylpropanol	Alcohol	122-97-4	74073.5	58341.9	59983	247075	261535	254305	1.07545	1.08098e-05	3.96529	1.98743	up
XMW0855	C6H10OS2	Ethanone, 1-(2-methyl-1,3-dithiolan-2-yl)-	Heterocyclic compound	33266-07-8	31150.2	27089.7	32932	110331	95873.1	103102	1.07449	0.000987524	3.39257	1.76238	up
KMW0413	C10H14O	(-)-Carvone	Terpenoids	6485-40-1	2.01471e+07	1.42219e+07	1.6266e+07	9	9	9	1.08168	0.0104332	5.33228e-07	-20.8387	down
XMW0776	C10H10O2	Benzoic acid, 2-propenyl ester	Ester	583-04-0	6.09089e+07	4.21714e+07	4.89473e+07	13980.9	94237.7	54109.3	1.06747	0.011506	0.00106775	-9.87121	down
XMW0497	C6H4O2S	2,5-ThiophenedicarboxAldehyde	Heterocyclic compound	932-95-6	9	9	9	6209.32	5563.32	5886.32	1.08175	0.00100526	654.035	9.35322	up
KMW0489	C10H14O	1-Cyclohexene-1-carboxAldehyde, 4-(1-methylethenyl)-, (S)-	Aldehyde	18031-40-8	6434	6874	1851	375.406	396.167	385.787	1.01961	0.100818	0.0763481	-3.71126	down
NMW0176	C8H9NO	Benzeneacetamide	Amine	103-81-1	765363	606481	561571	321873	259424	290648	1.04067	0.0221008	0.450987	-1.14884	down
D106	C10H10O2	1,1'-(1,4-phenylene)bis-Ethanone	Ketone	1009-61-6	78075.7	53066.2	161752	935555	757585	846570	1.03765	0.000616814	8.67109	3.11621	up
XMW0472	C9H10O3	1,2-Ethanediol, monobenzoate	Ester	94-33-7	239499	150762	165550	5388.48	3795.72	4592.1	1.07698	0.0222838	0.0247859	-5.33434	down
XMW0544	C15H24	Azulene, 1,2,3,3a,4,5,6,7-octahydro-1,4-dimethyl-7-(1-methylethenyl)-, [1R-(1.alpha.,3a.beta.,4.alpha.,7.beta.)]-	Terpenoids	22567-17-5	3.90458e+06	2.35842e+06	2.79035e+06	112384	75383.9	93884	1.07546	0.0238769	0.0311103	-5.00646	down
KMW0563	C13H22O	5,9-Undecadien-2-one, 6,10-dimethyl-, (E)-	Ketone	3796-70-1	635421	549750	517542	3.48154e+06	2.81927e+06	3.15041e+06	1.07642	0.00433123	5.55069	2.47267	up
XMW1455	C7H9NO2	5-Amino-2-methoxyphenol	Phenol	1687-53-2	244951	240627	157837	9745.26	8987.18	9366.22	1.07698	0.0185628	0.0436711	-4.51718	down
NMW0177	C8H9NO	N-Benzylformamide	Amine	6343-54-0	2.07023e+06	2.0542e+06	1.35241e+06	169960	132901	151430	1.07308	0.019228	0.0829477	-3.59165	down
D99	C10H13NO2	Benzoic acid, 2-(dimethylamino)-, methyl ester	Ester	10072-05-6	15774.6	17054.6	17701.8	3830.24	3258.04	3544.14	1.0791	0.000867419	0.210414	-2.2487	down
NMW0201	C11H15NO	Phenmetrazine	Heterocyclic compound	134-49-6	50264.8	34527.7	98966	557420	452875	505148	1.04002	0.000592712	8.24693	3.04386	up
D156	C13H18O2	Propanoic acid, 2-methyl-, 3-phenylpropyl ester	Ester	103-58-2	35182.4	32717.8	22637.1	9	9	9	1.08113	0.0157967	0.00029822	-11.7113	down
NMW0193	C8H10O2	Benzeneethanol, 4-hydroxy-	Alcohol	501-94-0	99335	80149.6	78740.8	573722	447000	510361	1.07457	0.00600995	5.92925	2.56785	up
XMW0819	C15H24	(1S,4S,4aR)-1-Isopropyl-4-methyl-7-methylene-1,2,3,4,4a,5,6,7-octahydronaphthalene	Terpenoids	157477-72-0	1.0834e+06	691745	661039	301296	237898	269597	1.03059	0.0550885	0.331991	-1.59079	down
KMW0597	C15H24	.gamma.-Muurolene	Terpenoids	30021-74-0	3911368	2373623	2803874	115948	101855	108901	1.07716	0.0237142	0.0359455	-4.79804	down
XMW1356	C16H34	Dodecane, 2-methyl-6-propyl-	Hydrocarbons	55045-08-4	91330	66242.6	84943.4	470032	396303	433167	1.07289	0.00150202	5.35842	2.42181	up
D358	C12H22O2	4-tert-Butylcyclohexyl acetate	Ester	32210-23-4	56740.3	37360.2	42317	9	9	9	1.0813	0.0159569	0.000197922	-12.3028	down
XMW0303	C12H22O2	Hexanoic acid, 5-hexenyl ester	Ester	108058-81-7	1.97933e+06	1.34973e+06	1.44805e+06	37503.7	35177.8	36340.8	1.07954	0.0154285	0.0228218	-5.45344	down
KMW0519	C8H8O3	Vanillin	Aldehyde	121-33-5	651324	665466	426032	1043.57	314.759	679.166	1.07539	0.0174012	0.00116908	-9.74041	down
XMW1164	C7H7BrO2	2-bromo-4-methoxy-Phenol	Phenol	17332-11-5	3840.1	2901.44	3357.63	1183.18	1194.54	1188.86	1.06851	0.0151274	0.353155	-1.50163	down
KMW0558	C14H24O2	1,5-Dimethyl-1-vinyl-4-hexenyl butyrate	Ester	78-36-4	438439	455159	274325	63565.6	53403.7	58484.7	1.06416	0.0288232	0.150227	-2.73478	down
XMW0979	C15H24	(4R,4aS,6S)-4,4a-Dimethyl-6-(prop-1-en-2-yl)-1,2,3,4,4a,5,6,7-octahydronaphthalene	Terpenoids	823810-22-6	811545	479411	575040	9	9	9	1.08134	0.0242735	1.44695e-05	-16.0766	down
NMW0160	C7H6O4	Benzoic Acid, 2,3-dihydroxy-	Acid	303-38-8	1.85682e+06	1.28282e+06	1.36332e+06	50442.2	44051.9	47247	1.07906	0.0148867	0.0314773	-4.98954	down
KMW0525	C10H20O2	n-Decanoic Acid	Acid	334-48-5	28560	19220	19812	9	9	9	1.08117	0.0175045	0.000399456	-11.2897	down
NMW0162	C10H18O2	8-Methyl-6-nonenoic Acid	Acid	21382-25-2	7.5496e+06	5.14995e+06	5.50861e+06	25547.6	22648.8	24098.2	1.08067	0.0149401	0.00397045	-7.97648	down
KMW0552	C15H24	(-)-.beta.-Bourbonene	Terpenoids	5208-59-3	1.80227e+06	1.24142e+06	1.29107e+06	339544	306107	322826	1.06722	0.0243045	0.223421	-2.16216	down
XMW0159	C16H34	2,6,10-Trimethyltridecane	Hydrocarbons	3891-99-4	92232.2	80574.6	75640.5	538473	430509	484491	1.07659	0.00506755	5.85023	2.54849	up
KMW0573	C15H24	(E)-.beta.-Famesene	Terpenoids	18794-84-8	445648	287647	844439	4.26506e+06	3.46632e+06	3.86569e+06	1.03446	0.000507728	7.35046	2.87783	up
w21	C10H14O2	2H-Pyran-2-one, 6-pentyl-	Heterocyclic compound	27593-23-3	69885.3	61986	60377.5	370351	293661	332006	1.07659	0.00604423	5.18088	2.3732	up
NMW0208	C9H16O3	9-Oxononanoic Acid	Acid	2553-17-5	14152	13676.7	13504.7	107910	90214.5	99062.3	1.08015	0.0035294	7.18999	2.84599	up
KMW0620	C15H22	Benzene, 1-(1,5-dimethyl-4-hexenyl)-4-methyl-	Terpenoids	644-30-4	1.23231e+07	9.75504e+06	1.101e+07	4.32785e+07	3.63779e+07	3.98282e+07	1.07271	0.00194102	3.6111	1.85244	up
XMW0974	C15H24	1,2,4-Methenoazulene, decahydro-1,5,5,8a-tetramethyl-, [1S-(1.alpha.,2.alpha.,3a.beta.,4.alpha.,8a.beta.,9R*)]-	Terpenoids	1137-12-8	12325.3	9476.32	9829.88	43218.2	40355.2	41786.7	1.07405	1.45873e-05	3.96314	1.98665	up
D102	C11H14O	1-Pentanone, 1-phenyl-	Ketone	1009-14-9	32392.5	24705.9	21813.5	83837.1	68096.8	75967	1.05101	0.00142609	2.88804	1.53009	up
NMW0163	C8H10O2	p-Hydroxyphenyl methyl carbinol	Alcohol	2380-91-8	2723.78	5865.06	2035.85	281834	243453	262643	1.07067	0.00164769	74.1602	6.21257	up
NMW0165	C7H8O2	Orcinol	Phenol	504-15-4	32710	22509.5	25975	9	9	9	1.08136	0.0120301	0.000332535	-11.5542	down
NMW0164	C10H10O2	Benzene, 1,2-(methylenedioxy)-4-propenyl-, (E)-	Aromatics	4043-71-4	4638.3	4199.43	4005.75	10856.7	9269.88	10063.3	1.07033	0.00236326	2.3506	1.23303	up
KMW0522	C15H24	Copaene	Terpenoids	3856-25-5	38621.2	31677.7	26604.4	75748.9	61629	68689	1.02987	0.00268312	2.12652	1.08849	up
D175	C12H18O	.beta.-Phenylethylmethylethylcarbinol	Alcohol	10415-87-9	1.63426e+06	1.13171e+06	1.16166e+06	3.03984e+07	2.78922e+07	2.91453e+07	1.07872	0.000391411	22.2617	4.47649	up
NMW0180	C6H6N2O	Niacinamide	Amine	98-92-0	97298.9	91081.8	63451.7	32689	25994.8	29341.9	1.03992	0.0308644	0.349541	-1.51647	down
KMW0589	C15H24	Humulene	Terpenoids	6753-98-6	1.41356e+06	957673	2.67922e+06	1.34645e+07	1.09266e+07	1.21955e+07	1.03698	0.000543769	7.24421	2.85683	up
XMW0099	C13H28	Decane, 2,3,5-trimethyl-	Hydrocarbons	62238-11-3	46361.6	49026	30789	9	9	9	1.08111	0.0178052	0.000213986	-12.1902	down
XMW1182	C15H24	Di-epi-.alpha.-cedrene-(I)	Terpenoids	21996-77-0	2.26879e+06	1.58811e+06	1.51022e+06	3.92099e+06	3.55494e+06	3.73796e+06	1.02224	0.00687051	2.08937	1.06307	up
XMW0372	C15H32	Tridecane, 4,8-dimethyl-	Hydrocarbons	55030-62-1	115026	78700.9	82451.7	2.2006e+06	2.01244e+06	2.10652e+06	1.07871	0.000449426	22.8821	4.51615	up
XMW1331	C10H12O2	2-Propanone, 1-(4-methoxyphenyl)-	Ketone	122-84-9	5.72775e+06	3.91758e+06	4.15195e+06	123134	114211	118672	1.07935	0.0157128	0.0258034	-5.27629	down
NMW0169	C6H6O3	1,2,3-Benzenetriol	Phenol	87-66-1	96957.9	64664.2	70083.1	7562.28	8091.22	7826.75	1.07502	0.020053	0.101337	-3.30277	down
KMW0526	C13H18O	2-Buten-1-one, 1-(2,6,6-trimethyl-1,3-cyclohexadien-1-yl)-, (E)-	Terpenoids	23726-93-4	1.82303e+07	1.2564e+07	1.34528e+07	193365	194903	194134	1.08018	0.0143002	0.0131625	-6.24742	down
XMW1097	C12H22O2	Hexanoic acid, 3-hexenyl ester	Ester	84434-19-5	290757	203608	214512	62794.5	54636	58715.2	1.06608	0.0223403	0.248486	-2.00876	down
XMW0618	C12H22O2	Ethyl 9-decenoate	Ester	67233-91-4	2999.58	1914.39	1739.41	8694.8	7592.14	8143.47	1.0476	0.000388402	3.67188	1.87652	up
WMW0089	C13H22O	5,9-Undecadien-2-one, 6,10-dimethyl-	Ketone	689-67-8	636449	550151	517831	3.48154e+06	2.81927e+06	3.15041e+06	1.07639	0.00432078	5.54509	2.47121	up
KMW0572	C9H8O2	trans-Cinnamic Acid	Acid	140-10-3	85925.7	71168.8	67744.9	390205	314672	352439	1.07377	0.00404318	4.70254	2.23344	up
XMW0423	C13H22O	6,8-Nonadien-2-one, 8-methyl-5-(1-methylethyl)-, (E)-	Ketone	54868-48-3	5.63208e+06	3.87809e+06	4.17037e+06	160924	146175	153549	1.07909	0.0148182	0.0336718	-4.89232	down
KMW0533	C9H9N	Indole, 3-methyl-	Heterocyclic compound	83-34-1	32307.6	23199.5	22577.4	10564.8	9399.56	9982.19	1.04813	0.0350432	0.383515	-1.38265	down
NMW0170	C9H8O2	Hydrocoumarin	Heterocyclic compound	119-84-6	72926.8	49023.1	46448.9	13362.6	11535.2	12448.9	1.06053	0.0348347	0.221775	-2.17283	down
D434	C12H22O2	5-Decen-1-ol, acetate, (E)-	Ester	38421-90-8	39248	39388	27156	8671	6700	7685.5	1.06267	0.0192924	0.217942	-2.19799	down
NMW0171	C8H8O3	Acetic Acid, phenoxy-	Acid	122-59-8	93050.2	68240	77386.8	456239	364198	410219	1.07212	0.00403325	5.15616	2.3663	up
XMW1098	C12H24O2	Butanoic acid, octyl ester	Ester	110-39-4	9	9	9	128489	127121	127805	1.08182	9.55152e-06	14200.6	13.7937	up
XMW0825	C15H24	Bicyclo[3.1.1]heptane, 6-methyl-2-methylene-6-(4-methyl-3-pentenyl)-, [1R-(1.alpha.,5.alpha.,6.beta.)]-	Terpenoids	55123-21-2	211243	174512	173198	1.09254e+06	881901	987220	1.07565	0.0043358	5.29859	2.40561	up
XMW0019	C8H8O2	Acetophenone, 4'-hydroxy-	Ketone	99-93-4	163533	110999	313647	1.69695e+06	1.38309e+06	1.54002e+06	1.03944	0.000528665	7.85485	2.97358	up
KMW0537	C15H24	Cyclohexane, 1-ethenyl-1-methyl-2,4-bis(1-methylethenyl)-, (1.alpha.,2.beta.,4.beta.)-	Terpenoids	33880-83-0	1.71189e+06	1.66473e+06	1.17014e+06	600457	480522	540489	1.04398	0.0263335	0.35662	-1.48754	down
XMW0980	C15H24	(1R,3aR,4aR,8aR)-1,4,4,6-Tetramethyl-1,2,3,3a,4,4a,7,8-octahydrocyclopenta[1,4]cyclobuta[1,2]benzene	Terpenoids	94482-89-0	666274	557618	510384	3.24565e+06	2.5833e+06	2.91447e+06	1.07334	0.00461968	5.04154	2.33387	up
XMW1077	C7H14O4	1,3-Dioxolane-2,2-diethanol	Alcohol	5694-95-1	214224	171167	151872	30777	22213.5	26495.3	1.07064	0.0130746	0.147946	-2.75686	down
XMW0197	C15H24	(1S,4S,4aS)-1-Isopropyl-4,7-dimethyl-1,2,3,4,4a,5-hexahydronaphthalene	Terpenoids	267665-20-3	888756	558769	1.29085e+06	5.256e+06	4.22151e+06	4.73876e+06	1.03746	0.000799133	5.1915	2.37615	up
XMW0552	C13H16O2	2,2'-Isopropylidenebis(5-methylfuran)	Heterocyclic compound	59212-75-8	82035	61325.1	155736	930224	743299	836761	1.04739	0.0011415	8.39289	3.06917	up
D204	C13H26O2	Pentyl octanoate	Ester	638-25-5	116053	67229.4	103041	501271	426104	463688	1.05782	0.000329985	4.85837	2.28047	up
KMW0603	C15H24	Germacrene D	Terpenoids	23986-74-5	3.98536e+06	2.41806e+06	3.09622e+06	8.29568e+06	6.87007e+06	7.58287e+06	1.02264	0.0020351	2.39468	1.25983	up
XMW0461	C12H20O2	cis-3-Hexenyl cis-3-hexenoate	Ester	61444-38-0	286253	198461	214239	61574.8	53669.1	57622	1.06612	0.0222801	0.247321	-2.01554	down
XMW0182	C15H24	(3S,3aS,6R,8aS)-3,8,8-Trimethyl-7-methyleneoctahydro-1H-3a,6-methanoazulene	Terpenoids	31145-21-8	557379	371279	352396	12805.6	10194	11499.8	1.07748	0.0238817	0.0269304	-5.21462	down
XMW0629	C15H24	3H-3a,7-Methanoazulene, 2,4,5,6,7,8-hexahydro-1,4,9,9-tetramethyl-, [3aR-(3a.alpha.,4.beta.,7.alpha.)]-	Terpenoids	2387-78-2	434289	278954	309494	35504.6	28912.3	32208.5	1.07335	0.0227311	0.0944773	-3.40389	down
XMW0964	C15H24	Petasitene	Terpenoids	443124-67-2	2195.09	618.983	2071.6	509995	468814	489404	1.07125	0.000581471	300.514	8.23129	up
XMW0950	C13H18	Naphthalene, 1,2,3,4-tetrahydro-1,4,6-trimethyl-	Aromatics	22824-32-4	28272.8	17586	22945.9	5814.7	4464.78	5139.74	1.05822	0.027173	0.224101	-2.15778	down
D341	C15H24	Naphthalene, decahydro-1,6-bis(methylene)-4-(1-methylethyl)-, (4.alpha.,4a.alpha.,8a.alpha.)-	Terpenoids	30021-46-6	445847	303289	803319	3.88031e+06	3.13923e+06	3.50977e+06	1.03836	0.000605695	6.78237	2.76179	up
KMW0210	C15H24	1H-Cyclopenta[1,3]cyclopropa[1,2]benzene, octahydro-7-methyl-3-methylene-4-(1-methylethyl)-, [3aS-(3a.alpha.,3b.beta.,4.beta.,7.alpha.,7aS*)]-	Terpenoids	13744-15-5	2.27774e+06	1.5784e+06	1.50535e+06	351150	264496	307823	1.06515	0.0255905	0.172241	-2.5375	down
KMW0478	C15H24	cis-.beta.-Farnesene	Terpenoids	28973-97-9	162338	145402	129397	941056	749474	845265	1.07586	0.00511472	5.80093	2.53628	up
D436	C10H12O3	Methyl p-tolyloxyacetate	Ester	38768-63-7	1944.94	741.853	1207.94	27064.1	26694.8	26879.4	1.06517	5.58014e-05	20.7045	4.37187	up
NMW0158	C7H7NO3	Benzene, 1-methoxy-2-nitro-	Aromatics	91-23-6	362312	218866	228289	23662.4	30525.3	27093.8	1.06844	0.0343406	0.100414	-3.31597	down
D445	C11H16O3	Furfuryl hexanoate	Ester	39252-02-3	998063	680325	739631	37076	32094.3	34585.1	1.07836	0.0155987	0.0429093	-4.54257	down
XMW0738	C8H9NO2	Benzoic acid, 4-amino-, methyl ester	Ester	619-45-4	75153.5	69179.6	64014.9	13884.2	10008.2	11946.2	1.07431	0.0012789	0.172013	-2.53941	down
WMW0217	C12H22O	2-Octenal, 2-butyl-	Alcohol	13019-16-4	4.68639e+06	3.26784e+06	3.4881e+06	644055	589613	616834	1.07314	0.0183737	0.161724	-2.62839	down
XMW1172	C9H8O3	3,6-Dimethyl-4H-furo[3,2-c]pyran-4-one	Heterocyclic compound	36745-38-7	5387.59	5460.04	5157.34	62848.5	58138	60493.2	1.0815	0.000577396	11.339	3.50322	up
KMW0532	C12H24O2	Hexanoic acid, hexyl ester	Ester	6378-65-0	192529	134043	127537	641781	585744	613763	1.06376	9.04954e-05	4.05473	2.01961	up
XMW0195	C15H26	1H-Cycloprop[e]azulene, decahydro-1,1,4,7-tetramethyl-, [1aR-(1a.alpha.,4.beta.,4a.beta.,7.beta.,7a.beta.,7b.alpha.)]-	Terpenoids	28580-43-0	2.19914e+06	1.53919e+06	1.61924e+06	21207.8	19782.1	20495	1.08032	0.0135904	0.0114763	-6.4452	down
XMW1222	C7H6Cl2O3	2,4-Dioxabicyclo[3.2.0]hept-6-en-3-one, 1,5-dichloro-6,7-dimethyl-	Ketone	35436-20-5	100879	69810.5	74622.8	4867.57	4203.59	4535.58	1.07791	0.0152396	0.055467	-4.17223	down
NMW0166	C12H10	Biphenyl	Aromatics	92-52-4	611824	417196	450037	5806.05	6807.79	6306.92	1.07984	0.0149323	0.0127924	-6.28856	down
XMW0384	C15H24	4,7-Methanoazulene, 1,2,3,4,5,6,7,8-octahydro-1,4,9,9-tetramethyl-, [1S-(1.alpha.,4.alpha.,7.alpha.)]-	Terpenoids	514-51-2	2.27935e+06	1.58011e+06	1.50662e+06	352846	266148	309497	1.06512	0.0256052	0.17303	-2.53091	down
KMW0530	C12H20O2	Geranyl acetate	Terpenoids	105-87-3	1.82276e+07	1.25639e+07	1.34473e+07	194697	196769	195733	1.08017	0.0143051	0.0132734	-6.23532	down
XMW0781	C8H7NO4	2-Nitrophenyl acetate	Ester	610-69-5	155487	107201	112199	10965.5	11269.7	11117.6	1.07646	0.0176522	0.0889676	-3.49058	down
NMW0168	C10H18O4	Diethyl adipate	Ester	141-28-6	177243	121551	128812	22012.9	21335.1	21674	1.07308	0.0202724	0.15206	-2.71728	down
XMW0262	C15H22	1,1,7,7a-Tetramethyl-1a,2,6,7,7a,7b-hexahydro-1H-cyclopropa[a]naphthalene	Terpenoids	154098-14-3	30029.4	19360.5	18999.1	9	9	9	1.08093	0.0242943	0.0003948	-11.3066	down
XMW1412	C15H24	1H-3a,7-Methanoazulene, 2,3,4,7,8,8a-hexahydro-3,6,8,8-tetramethyl-, (3R,3aS,7S,8aR)-	Terpenoids	65354-33-8	2.26601e+06	1.58411e+06	1.50904e+06	3.89956e+06	3.5344e+06	3.71698e+06	1.02154	0.0070492	2.08073	1.05709	up
XMW0856	C10H12O2	1-Butanone, 2-hydroxy-1-phenyl-	Ketone	16183-46-3	150938	119303	120563	537500	425238	481369	1.06889	0.00478481	3.69522	1.88566	up
WMW0220	C15H24	2H-2,4a-Methanonaphthalene, 1,3,4,5,6,7-hexahydro-1,1,5,5-tetramethyl-, (2S)-	Terpenoids	1135-66-6	2.60122e+06	1.67452e+06	1.83842e+06	438599	350277	394438	1.06396	0.0280635	0.193537	-2.36932	down
XMW0962	C12H16O2	Butanoic acid, 2-methyl-, phenylmethyl ester	Ester	56423-40-6	15392.9	35941.1	18451.2	362746	339790	351268	1.0634	3.76024e-06	15.1007	3.91654	up
XMW0701	C10H12N2	1H-Pyrrolo[2,3-b]pyridine, 2-(1-methylethyl)-	Heterocyclic compound	27257-18-7	6050.22	3960.61	3866.93	13570.2	12769	13169.6	1.04388	0.00369496	2.84691	1.5094	up
XMW0728	C12H16O	Benzenemethanol, 4-methyl-.alpha.-(1-methyl-2-propenyl)-, (R*,R*)-	Alcohol	83173-76-6	57669.6	41446.8	43223.4	224213	184497	204355	1.06825	0.00161373	4.30705	2.1067	up
D283	C13H20O	2-Buten-1-one, 1-(2,6,6-trimethyl-2-cyclohexen-1-yl)-, (E)-	Ketone	24720-09-0	97331.1	83580.8	75595.2	567108	464662	515885	1.07611	0.00340568	6.03358	2.59301	up
NMW0172	C9H13NO2	Ethinamate	Ester	126-52-3	765345	606440	520048	319397	267557	293477	1.02779	0.0377298	0.465385	-1.1035	down
NMW0173	C7H6O4	2,6-dihydroxy-Benzoic Acid	Acid	303-07-1	223951	218203	152033	56829.7	46664.8	51747.2	1.0593	0.0225121	0.261268	-1.9364	down
WMW0010	C15H24	beta-Elemen	Terpenoids	515-13-9	1.78631e+06	1.2272e+06	1.2756e+06	360915	334901	347908	1.06561	0.0260858	0.243343	-2.03894	down
XMW1408	C15H24	1H-Cyclopropa[a]naphthalene, 1a,2,3,3a,4,5,6,7b-octahydro-1,1,3a,7-tetramethyl-, [1aR-(1a.alpha.,3a.alpha.,7b.alpha.)]-	Terpenoids	489-29-2	67232.2	52097.3	55073.7	315122	254480	284801	1.07359	0.00378534	4.89901	2.29249	up
XMW0743	C15H24	(-)-Aristolene	Terpenoids	6831-16-9	246643	210782	202244	1.36126e+06	1.10855e+06	1.23491e+06	1.07668	0.00404465	5.61602	2.48955	up
XMW1101	C14H22	Benzene, 1,4-dimethyl-2,5-bis(1-methylethyl)-	Aromatics	10375-96-9	19187.3	14457.2	16125.6	84442.8	70042.4	77242.6	1.07316	0.00223249	4.65597	2.21908	up
KMW0544	C11H14O2	Methyleugenol	Phenol	93-15-2	4721.09	1602.8	3510.3	18970.7	17867.8	18419.3	1.01999	0.00149303	5.61895	2.4903	up
XMW0805	C10H10S	Benzo[b]thiophene, 2-ethyl-	Heterocyclic compound	1196-81-2	32761	27569.9	23470.3	1642.88	1465.19	1554.03	1.07901	0.0102043	0.0556327	-4.16792	down
KMW0548	C15H24	[1aR-(1a.alpha.,4.alpha.,4a.beta.,7b.alpha.)]-1a,2,3,4,4a,5,6,7b-octahydro-1,1,4,7-tetramethyl-1H-Cycloprop[e]azulene	Terpenoids	489-40-7	269914	226149	176740	8352.17	7732.68	8042.42	1.07862	0.0151385	0.0358609	-4.80145	down
w39	C13H22O	2-Butanone, 4-(2,6,6-trimethyl-2-cyclohexen-1-yl)-	Ketone	31499-72-6	23480.9	17694.7	18437.6	73013.7	68118.2	70566	1.07133	4.01127e-05	3.55119	1.8283	up
KMW0559	C15H24	Bicyclo[7.2.0]undec-4-ene, 4,11,11-trimethyl-8-methylene-,[1R-(1R*,4Z,9S*)]-	Terpenoids	118-65-0	9	9	9	270139	254918	262528	1.08181	0.000280035	29169.8	14.8322	up
KMW0560	C9H6O2	Coumarin	Heterocyclic compound	91-64-5	28838.1	17626.2	17890.1	9	9	9	1.08078	0.0284208	0.000419552	-11.2189	down
XMW0797	C15H24	Naphthalene, 1,2,4a,5,6,8a-hexahydro-4,7-dimethyl-1-(1-methylethyl)-,[1R-(1.alpha.,4a.alpha.,8a.alpha.)]-	Terpenoids	17627-24-6	1.05465e+06	644150	673823	9	9	9	1.08134	0.0268092	1.13798e-05	-16.4232	down
NMW0190	C12H23N	CyclohexanAmine, N-cyclohexyl-	Amine	101-83-7	984.855	924.416	870.377	2990.2	1971.73	2480.96	1.04705	0.0325857	2.67764	1.42096	up
D353	C15H24	(S,1Z,6Z)-8-Isopropyl-1-methyl-5-methylenecyclodeca-1,6-diene	Terpenoids	317819-80-0	626576	522677	499708	3.26923e+06	2.63107e+06	2.95015e+06	1.07526	0.00435829	5.36729	2.42419	up
XMW1260	C13H24O	1-Cyclohexene-1-propanol, .alpha.,2,6,6-tetramethyl-	Alcohol	3293-47-8	13367.1	9368.74	9788.67	43876.9	33367.6	38622.3	1.05789	0.0052726	3.56245	1.83287	up
XMW0160	C13H18O	Megastigmatrienone	Ketone	38818-55-2	4851.61	3571.42	3463.71	9	9	9	1.08105	0.0124773	0.00227144	-8.78218	down
XMW0198	C13H22O	3-Buten-2-ol, 4-(2,6,6-trimethyl-2-cyclohexen-1-yl)-, (3E)-	Alcohol	25312-34-9	176241	134386	282363	1.22269e+06	997823	1.11026e+06	1.04818	0.000621082	5.6169	2.48977	up
KMW0566	C15H24	(4aR-trans)-decahydro-4a-methyl-1-methylene-7-(1-methylethylidene)-Naphthalene	Terpenoids	515-17-3	3.74334e+06	3.50317e+06	3.29434e+06	2.78736e+07	2.33078e+07	2.55907e+07	1.07959	0.00329214	7.28329	2.86459	up
WMW0095	C13H24O	5,9-Undecadien-2-ol, 6,10-dimethyl-	Alcohol	53837-34-6	208871	168011	366827	1.63938e+06	1.3329e+06	1.48614e+06	1.04642	0.000619746	5.99485	2.58372	up
XMW0948	C15H24	Valerena-4,7(11)-diene	Terpenoids	351222-66-7	392858	257928	553476	2.17435e+06	1.75412e+06	1.96423e+06	1.04116	0.000791265	4.8932	2.29078	up
WMW0207	C15H30	Cyclohexane, 1-(1,5-dimethylhexyl)-4-methyl-	Hydrocarbons	29799-19-7	27435	24729.7	32841.7	73531.8	61653.5	67592.6	1.05554	0.00121372	2.38544	1.25426	up
XMW0045	C15H24	(1R,4R,4aS,8aR)-4,7-Dimethyl-1-(prop-1-en-2-yl)-1,2,3,4,4a,5,6,8a-octahydronaphthalene	Terpenoids	92692-39-2	352395	229938	569773	2.49931e+06	2.04208e+06	2.2707e+06	1.03824	0.00049927	5.91273	2.56382	up
WMW0148	C15H24	Spiro[4.5]dec-7-ene, 1,8-dimethyl-4-(1-methylethenyl)-, [1S-(1.alpha.,4.beta.,5.alpha.)]-	Terpenoids	24048-44-0	497708	299478	361408	9	9	9	1.08134	0.022223	2.33041e-05	-15.3891	down
XMW0549	C15H24	(1S,4aR,7R)-1,4a-Dimethyl-7-(prop-1-en-2-yl)-1,2,3,4,4a,5,6,7-octahydronaphthalene	Terpenoids	52026-55-8	20022	15783.7	16331.8	106405	86780.1	96592.7	1.07535	0.0034993	5.55796	2.47456	up
KMW0576	C15H24	Aromandendrene	Terpenoids	489-39-4	100714	60527.5	64918.4	9	9	9	1.08106	0.0273444	0.000119384	-13.0321	down
XMW0987	C15H22	Eudesma-2,4,11-triene	Terpenoids	82462-31-5	2.25787e+06	2.21837e+06	1.95361e+06	6.18789e+06	5.33757e+06	5.76273e+06	1.0733	0.00171529	2.68874	1.42693	up
KMW0585	C14H26O2	Citronellyl isobutyrate	Ester	97-89-2	984042	770323	839661	4.30363e+06	3.6255e+06	3.96457e+06	1.07488	0.00192343	4.58503	2.19693	up
XMW1405	C12H10	1,8-Ethylenenaphthalene	Aromatics	83-32-9	1957.91	1264.6	1242.28	9	9	9	1.07982	0.0243031	0.00604733	-7.36949	down
XMW0742	C15H24	10,10-Dimethyl-2,6-dimethylenebicyclo[7.2.0]undecane	Terpenoids	357414-37-0	352130	215348	231889	11784.2	9091.97	10438.1	1.07569	0.0271604	0.0391738	-4.67397	down
XMW0992	C15H22	(2R,8R,8aS)-8,8a-Dimethyl-2-(prop-1-en-2-yl)-1,2,3,7,8,8a-hexahydronaphthalene	Terpenoids	5090-61-9	351793	229966	569773	2.49712e+06	2.04084e+06	2.26898e+06	1.03824	0.000495601	5.9112	2.56345	up
KMW0674	C12H24O	trans-2-Dodecen-1-ol	Alcohol	69064-37-5	84884.2	66242.6	84943.4	470032	396303	433167	1.07496	0.0019241	5.50473	2.46067	up
KMW0483	C11H22O	Undecanal	Aldehyde	112-44-7	14262.2	11722.6	6524.56	206851	180019	193435	1.06808	0.00085052	17.8504	4.15789	up
D294	C10H16O	2-Cyclopenten-1-one, 2-pentyl-	Ketone	25564-22-1	41618.8	24238.5	28149	261124	239649	250387	1.06934	1.41833e-05	7.99053	2.99829	up
KMW0481	C11H22O2	Acetic acid, nonyl ester	Ester	143-13-5	9	9	9	33948.4	29917.6	31933	1.08176	0.00132586	3548.11	11.7928	up
NMW0143	C10H15N	BenzenAmine, 2,6-diethyl-	Amine	579-66-8	603588	823402	409162	22452.3	20101.8	21277.1	1.07362	0.0386556	0.0347636	-4.84628	down
XMW1463	C12H20O3	2-Oxabicyclo[2.2.2]octan-6-ol, 1,3,3-trimethyl-, acetate	Ester	57709-95-2	41104.2	42109	35967.2	231689	220136	225912	1.08	1.14604e-05	5.68665	2.50758	up
NMW0145	C7H7NO	Benzamide	Amine	55-21-0	71429.3	50352.2	53641	304331	141999	223165	1.01177	0.0696173	3.81647	1.93224	up
XMW1273	C10H14N2O	1-(5-Dimethylethyl)pyrazin-2-yl-ethan-1-one	Heterocyclic compound	182306-61-2	2453.71	1825.21	2108.7	24859.5	9025.79	16942.7	1.03353	0.0832304	7.95726	2.99227	up
XMW0731	C11H16	Benzene, pentamethyl-	Aromatics	700-12-9	417922	413489	370459	9	9	9	1.08178	0.00142448	2.2465e-05	-15.442	down
NMW0129	C12H20O2	Cyclohexanol, 1-methyl-4-(1-methylethenyl)-, acetate	Ester	10198-23-9	211457	133292	122087	705592	649644	677618	1.05496	0.000365304	4.35454	2.12252	up
KMW0482	C10H16O	2,4-Decadienal, (E,E)-	Aldehyde	25152-84-5	31156.4	20412.8	18974.2	118068	106303	112186	1.0615	7.30712e-05	4.77092	2.25427	up
D74	C9H10O2	4-Acetylanisole	Ketone	100-06-1	17943.7	12291.6	15861.8	138559	130984	134771	1.07622	3.53772e-06	8.77093	3.13273	up
XMW0422	C14H30	3,5-Dimethyldodecane	Hydrocarbons	107770-99-0	1523.05	1053.23	1091.17	4.98988e+06	4.64026e+06	4.81507e+06	1.08143	0.00043928	3938.75	11.9435	up
XMW0047	C10H14O	Phenol, 2-(1-methylpropyl)-	Phenol	89-72-5	235901	124346	156495	1.14395e+07	1.03702e+07	1.09048e+07	1.07756	0.000731523	63.3092	5.98434	up
XMW0961	C12H20O2	Bornyl acetate	Terpenoids	76-49-3	9	9	9	2.00207e+07	1.85275e+07	1.92741e+07	1.08181	0.000499779	2.14157e+06	21.0302	up
D266	C13H26	1-Tridecene	Hydrocarbons	2437-56-1	30763.5	19279.8	20454.4	649451	602032	625741	1.07765	0.000233199	26.6282	4.73488	up
XMW0615	C10H14O	Phenol, m-tert-butyl-	Phenol	585-34-2	52414	27570.6	31055.5	2.42831e+06	2.23107e+06	2.32969e+06	1.07715	0.0005013	62.9419	5.97595	up
D415	C11H14O2	Isobutyric acid, 2-methylphenyl ester	Ester	36438-54-7	9	9	9	4.93392e+06	4.58308e+06	4.7585e+06	1.08181	0.000452686	528722	19.0122	up
XMW0025	C9H10O2	Paroxypropione	Ketone	70-70-2	3.74397e+06	2.35053e+06	2.24705e+06	7.75982e+06	7.07775e+06	7.41879e+06	1.02863	0.00480653	2.66814	1.41583	up
XMW1131	C8H10O3	2,5-Furandione, 3-methyl-4-propyl-	Heterocyclic compound	16493-20-2	61966.1	88416	39213.9	878.892	1061.17	970.031	1.07433	0.0484318	0.0153489	-6.02572	down
KMW0515	C12H22O2	6-Octen-1-ol, 3,7-dimethyl-, acetate	Ester	150-84-5	61823	45771.3	35619.9	118423	110047	114235	1.01916	0.00802383	2.39296	1.25879	up
KMW0557	C9H10O3	Benzoic acid, 2-hydroxy-, ethyl ester	Ester	118-61-6	9	9	9	27157.4	25308.9	26233.2	1.08179	0.000413761	2914.79	11.5092	up
NMW0124	C10H16O2	2-Cyclohexen-1-one, 2-hydroxy-3-methyl-6-(1-methylethyl)-	Terpenoids	490-03-9	9	9	9	2552	2126	2339	1.08158	0.00277406	259.889	8.02175	up
KMW0491	C9H10O2	Hydrocinnamic Acid	Acid	501-52-0	534924	467192	351313	1.57634e+06	1.39932e+06	1.48783e+06	1.0584	0.000153295	3.29791	1.72155	up
KMW0490	C9H16O2	trans-3-Methyl-4-octanolide	Ester	39638-67-0	11642.1	9622	8362.98	523809	493383	508596	1.08061	0.000267438	51.4998	5.68649	up
XMW1102	C11H10O2	Vinyl trans-cinnamate	Ester	17719-70-9	204405	302919	406071	8576.17	6531.67	7553.92	1.07488	0.0363547	0.0248105	-5.33291	down
XMW0956	C12H18O2	2-Cyclohexen-1-ol, 2-methyl-5-(1-methylethenyl)-, acetate, cis-	Ester	1205-42-1	137355	103292	104091	9	9	9	1.08156	0.00940644	7.83205e-05	-13.6402	down
KMW0518	C12H20O2	2,6-Octadien-1-ol, 3,7-dimethyl-, acetate, (Z)-	Ester	141-12-8	7.54903e+06	5.14931e+06	5.50811e+06	25568.5	26578.6	26073.5	1.08068	0.0149527	0.00429631	-7.86269	down
XMW1340	C7H6S2	Thieno[2,3-b]thiophene,2-methyl-	Heterocyclic compound	13393-75-4	31369.8	23712.3	24619.2	4485.09	4363.33	4424.21	1.07638	0.0116793	0.16653	-2.58615	down
XMW0693	C11H18O2	2,6-Octadienoic acid, 3,7-dimethyl-, methyl ester	Ester	2349-14-6	17763.7	10132.3	11131.5	666065	550334	608199	1.07721	0.003011	46.7516	5.54694	up
XMW0722	C9H12O2	1-Cyclohexene-1-carboxAldehyde, 5,5-dimethyl-3-oxo-	Aldehyde	56621-35-3	9	9	9	2.05851e+06	1.90169e+06	1.9801e+06	1.0818	0.000522234	220011	17.7472	up
WMW0204	C12H18O2	Bicyclo[3.1.0]hexan-3-ol, 4-methylene-1-(1-methylethyl)-, acetate	Terpenoids	3536-54-7	88520.6	54551.9	66312.8	4.93225e+06	4.46966e+06	4.70095e+06	1.07944	0.000783082	67.3536	6.07368	up
XMW0803	C12H20O2	Iso-3-thujyl acetate	Ester	62181-90-2	276720	145468	163488	1.07446e+07	9.98199e+06	1.03633e+07	1.07674	0.000313159	53.0838	5.7302	up
NMW0125	C7H6O3	Salicylic Acid	Acid	69-72-7	4192.29	2215.69	2255.42	93937.2	85744.6	89840.9	1.0742	0.000333672	31.1105	4.95933	up
XMW0952	C12H24O2	4-Methylhexyl 3-methylbutanoate	Ester	1215127-80-2	9	9	9	61749.4	53181.2	57465.3	1.08174	0.00184805	6385.03	12.6405	up
KMW0493	C9H10O2	2-Methoxy-4-vinylphenol	Aromatics	7786-61-0	29793.5	52857	27123.2	183040	169467	176253	1.04704	0.000748904	4.81681	2.26808	up
XMW0081	C7H11NO3	L-Proline, 1-acetyl-	Acid	68-95-1	469287	317801	341229	6040.63	6166.57	6103.6	1.07983	0.015807	0.0162284	-5.94533	down
NMW0157	C8H9NO	Acetamide, N-phenyl-	Amine	103-84-4	5.67248e+06	3.87809e+06	4.20475e+06	144105	134811	139458	1.07924	0.0150574	0.0304154	-5.03905	down
D402	C10H14O2	Piperitenone oxide	Ketone	35178-55-3	278458	195575	212488	9	9	9	1.08153	0.0119899	3.93287e-05	-14.6341	down
KMW0717	C8H14O6	(+)-Diethyl L-tartrate	Ester	87-91-2	10482	8978.08	8037.62	1.41149e+06	1.19251e+06	1.302e+06	1.08112	0.00237973	142.048	7.15024	up
XMW0294	C11H20O	10-Undecenal	Aldehyde	112-45-8	105577	49631	63050.7	3985707	3735193	3860450	1.07541	0.000190026	53.0625	5.72962	up
D457	C12H24O2	1-Hexanol, 5-methyl-2-(1-methylethyl)-, acetate	Ester	40853-55-2	4.02258e+06	2.8531e+06	3.11188e+06	8958.09	4335.83	6646.96	1.07886	0.0112018	0.00199657	-8.96826	down
KMW0446	C10H16O	Citral	Terpenoids	5392-40-5	272212	285073	365833	25858.3	23241.4	24549.8	1.07884	0.0104993	0.0797834	-3.64777	down
NMW0136	C7H6O2	BenzAldehyde, 3-hydroxy-	Aldehyde	100-83-4	8112.59	6449.21	6695.01	28374.3	25189.8	26782.1	1.07445	0.000245874	3.77979	1.9183	up
XMW1433	C9H14O3	2,6-Heptanedione, 3-acetyl-	Ketone	29214-57-1	490586	352662	400760	11364.6	11495.1	11429.9	1.08015	0.00989769	0.0275638	-5.18108	down
NMW0104	C10H18O	2,6-Octadien-1-ol, 3,7-dimethyl-	Terpenoids	624-15-7	1.05905e+08	7.73522e+07	8.65229e+07	31174.6	29039.1	30106.9	1.08148	0.00865178	0.000334793	-11.5444	down
KMW0437	C10H12O2	Acetic acid, 2-phenylethyl ester	Ester	103-45-7	2.19083e+06	1.55903e+06	1.7209e+06	413437	388474	400955	1.07165	0.0171656	0.219872	-2.18527	down
NMW0105	C9H12O	Phenol, 4-propyl-	Phenol	645-56-7	7.01434e+07	4.89449e+07	5.67842e+07	189361	174241	181801	1.08102	0.0110267	0.00310113	-8.33299	down
XMW0764	C10H16O	(S)-(-)-(4-Isopropenyl-1-cyclohexenyl)methanol	Terpenoids	18457-55-1	5948.76	5082.03	3911.97	123170	106078	114624	1.07829	0.00178163	23.0126	4.52435	up
NMW0116	C12H21N	Memantine	Amine	19982-08-2	9	9	9	4.95174e+06	4.60032e+06	4.77603e+06	1.08181	0.00045085	530670	19.0175	up
KMW0473	C10H14O	4-Isopropylcyclohexa-1,3-dienecarbAldehyde	Aldehyde	1197-15-5	9	9	9	1.95711e+07	1.81745e+07	1.88728e+07	1.08181	0.000456069	2.09698e+06	20.9999	up
XMW1096	C12H22O2	Butanoic acid, 1-ethenylhexyl ester	Ester	16491-54-6	4067.33	2128.28	1826.53	53835.3	48118.6	50976.9	1.06784	0.000231555	19.0636	4.25275	up
NMW0123	C10H20O2	p-Menthane-3,8-diol, cis-1,3,trans-1,4-	Terpenoids	3564-98-5	69366.7	35662.3	41098.3	2.56996e+06	2.39542e+06	2.48269e+06	1.07641	0.000258854	50.9698	5.67157	up
D356	C8H10O2	3-Methoxy-5-methylphenol	Phenol	3209-13-0	6620.24	4509.62	3657.95	20563.4	18880.8	19722.1	1.05062	0.000556228	4.00102	2.00037	up
XMW0953	C11H14O2	Phenylacetic acid propyl ester	Ester	4606-15-9	14878.2	9429.11	5427.39	127908	117976	122942	1.05591	9.18337e-06	12.4039	3.63272	up
KMW0453	C12H20O2	Linalyl acetate	Terpenoids	115-95-7	624156379	4.50044e+08	5.13516e+08	200126	1.17075e+06	685437	1.06878	0.0091356	0.00129514	-9.59268	down
KMW0456	C10H22O	1-Decanol	Alcohol	112-30-1	26758.3	29019	37412.3	9	9	9	1.08154	0.010717	0.000289732	-11.753	down
w02	C10H18O	2,4-Decadien-1-ol	Alcohol	14507-02-9	9	9	9	8.21044e+06	7.72201e+06	7.96622e+06	1.08181	0.000313123	885136	19.7555	up
NMW0108	C10H14O2	Bicyclo[2.2.1]heptane-2,5-dione, 1,7,7-trimethyl-	Terpenoids	4230-32-4	1.06086e+08	7.73909e+07	8.6685e+07	28688.9	27024.6	27856.8	1.08149	0.00870179	0.000309334	-11.6585	down
NMW0109	C7H8O2	1,2-Benzenediol, 3-methyl-	Alcohol	488-17-5	1.49259e+06	1.09855e+06	1.15247e+06	9	9	9	1.08164	0.00962973	7.21228e-06	-17.0811	down
XMW0643	C7H12N2O	Butyramide, 2-cyano-2-ethyl-	Amine	18705-38-9	9	9	9	5.83917e+07	5.429e+07	5.63409e+07	1.08181	0.000441383	6.2601e+06	22.5778	up
NMW0120	C10H14O	Phenol, p-tert-butyl-	Phenol	98-54-4	52414	27570.6	31055.5	2.42831e+06	2.23107e+06	2.32969e+06	1.07715	0.0005013	62.9419	5.97595	up
XMW0968	C10H14O	4,7,7-Trimethylbicyclo[4.1.0]hept-3-en-2-one	Ketone	81800-50-2	12652.5	9956.93	6319.94	155229	136695	145962	1.07011	0.000547628	15.1364	3.91995	up
XMW0783	C10H16O	1-Adamantanol	Alcohol	768-95-6	369430	523773	211573	9	9	9	1.08042	0.0550033	2.44393e-05	-15.3204	down
XMW1470	C10H16O	[1,1'-Bicyclopentyl]-2-one	Ketone	4884-24-6	113795	121782	154178	14966	14752	14859	1.07809	0.0113187	0.114372	-3.1282	down
WMW0069	C9H8O	2-Propenal, 3-phenyl-	Aldehyde	104-55-2	9	9	9	259768	246566	253167	1.08181	0.000226566	28129.6	14.7798	up
D139	C11H16O	Benzenepropanol, .alpha.,.alpha.-dimethyl-	Alcohol	103-05-9	9	9	9	917771	868610	893191	1.08181	0.000252355	99243.4	16.5987	up
KMW0469	C9H12O2	Phenol, 4-ethyl-2-methoxy-	Phenol	2785-89-9	9	9	9	4.60062e+06	4.21898e+06	4.4098e+06	1.0818	0.000623583	489978	18.9024	up
NMW0122	C11H18O2	Geranyl formate	Ester	105-86-2	48853.6	25563.7	30645.1	1.92557e+06	1.77731e+06	1.85144e+06	1.07695	0.000407887	52.8669	5.72429	up
XMW0640	C15H24	Panaxene	Terpenoids	871660-95-6	13208	10667.6	7138.15	208260	185635	196948	1.07393	0.000614779	19.051	4.25179	up
D390	C11H18O	Cyclopentanone, 2-(2-hexenyl)-	Ketone	34687-46-2	4014.76	4467.65	3137.95	9	9	9	1.08113	0.010047	0.00232351	-8.74948	down
XMW0036	C10H16O2	1,3-Cyclopentanedione, 4-(3-methylbutyl)-	Ketone	939-86-6	14507.9	20725.1	8789.22	1599.44	1482.62	1541.03	1.05468	0.0624736	0.105017	-3.2513	down
XMW1061	C10H16S	Thiophene, 2-hexyl-	Heterocyclic compound	18794-77-9	9	9	9	1.5011e+06	1.39469e+06	1.4479e+06	1.0818	0.00044978	160878	17.2956	up
XMW0448	C2H4N6	1,2,4,5-Tetrazine-3,6-diAmine	Heterocyclic compound	19617-90-4	9	9	9	1.36817e+06	1.26514e+06	1.31665e+06	1.0818	0.000509898	146295	17.1585	up
D143	C10H12O2	Benzenepropanoic acid, methyl ester	Ester	103-25-3	9	9	9	2.65964e+06	2.40675e+06	2.53319e+06	1.0818	0.000829524	281466	18.1026	up
KMW0474	C11H22O	2-Undecanone	Ketone	112-12-9	11294.3	5794.36	8048.07	449476	419574	434525	1.0769	0.000273566	51.8593	5.69653	up
WMW0106	C11H20O2	6-Nonen-1-ol, acetate, (Z)-	Ester	76238-22-7	22056.4	19384	12796	411716	374321	393019	1.07583	0.000424413	21.7392	4.44223	up
XMW0424	C11H18O	2,6-Dimethyl-1-nonen-3-yn-5-ol	Alcohol	19780-98-4	453856	235669	292966	1.95299e+06	1.76419e+06	1.85859e+06	1.05696	7.02601e-05	5.67513	2.50465	up
NMW0114	C8H10O2	3-Methoxybenzyl Alcohol	Alcohol	6971-51-3	798.218	9	9	604408	555686	580047	1.03341	0.000585672	2131.96	11.058	up
D184	C6H6O2	Hydroquinone	Phenol	123-31-9	9	9	9	981364	899274	940319	1.0818	0.000634527	104480	16.6729	up
KMW0466	C10H18S	3-Cyclohexene-1-methanethiol, .alpha.,.alpha.,4-trimethyl-	Sulfur compounds	71159-90-5	22599.1	11476.1	15276.8	1.15938e+08	1.07741e+08	1.1184e+08	1.08082	0.000447446	6798.5	12.731	up
KMW0467	C9H8O	(E)-CinnamAldehyde	Aldehyde	14371-10-9	92656.7	72351.4	74976.3	5086.39	3749.29	4417.84	1.0783	0.00688133	0.0552266	-4.17849	down
KMW0508	C10H14O	p-Cymen-7-ol	Alcohol	536-60-7	8804.39	7591.74	7227.97	295285	267611	281448	1.08114	0.000820354	35.7408	5.1595	up
WMW0181	C11H20O2	4-Decenoic acid, methyl ester, Z-	Ester	7367-83-1	8028.77	10786.4	10751.3	155750	123766	139758	1.07727	0.0046835	14.1807	3.82586	up
D193	C10H16O	p-Mentha-1,8-dien-7-ol	Terpenoids	536-59-4	20647.3	20976.9	11209	1.46845e+07	1.33381e+07	14011313	1.07984	0.000769983	795.596	9.63589	up
KMW0509	C15H24	Cyclohexene, 4-ethenyl-4-methyl-3-(1-methylethenyl)-1-(1-methylethyl)-, (3R-trans)-	Terpenoids	20307-84-0	295575	165172	207240	2.25762e+06	960208	1.60891e+06	1.03343	0.0644139	7.2258	2.85316	up
NMW0142	C12H20O2	Cyclohexanol, 1-methyl-4-(1-methylethylidene)-, acetate	Ester	10235-63-9	71072.6	35382.6	50654	1.54981e+06	690004	1.11991e+06	1.06008	0.049808	21.3846	4.4185	up
XMW0733	C10H16O2	7-Oxabicyclo[4.1.0]heptan-2-one, 3-methyl-6-(1-methylethyl)-	Terpenoids	5729-99-7	1.06043e+08	7.74035e+07	8.65701e+07	31174.6	29140	30157.3	1.08148	0.0086927	0.000335061	-11.5433	down
D452	C10H14O2	Carvone oxide, trans-	Terpenoids	39903-97-4	2.18831e+07	1.54375e+07	1.78541e+07	153452	138423	145938	1.08073	0.0104502	0.00793502	-6.97755	down
KMW0384	C8H9NO2	Benzene, (2-nitroethyl)-	Aromatics	6125-24-2	1825.36	2121.49	1320.15	36937.4	32122.5	34530	1.07679	0.00139317	19.6677	4.29776	up
XMW1459	C10H16S	Thiophene, 2-butyl-5-ethyl-	Heterocyclic compound	54411-06-2	9	9	9	740460	690479	715469	1.0818	0.000406443	79496.6	16.2786	up
XMW1464	C11H16O	Benzene, (butoxymethyl)-	Ether	588-67-0	100694779	7.03572e+07	8.09415e+07	107061	106013	106537	1.08123	0.0110441	0.00126833	-9.62285	down
D430	C7H9NOS	5-Acetyl-2,4-dimethylthiazole	Heterocyclic compound	38205-60-6	1.50175e+06	1.09496e+06	1.23421e+06	9	9	9	1.08166	0.00862396	7.0479e-06	-17.1144	down
XMW0109	C13H28	Dodecane, 4-methyl-	Hydrocarbons	6117-97-1	1.26754e+06	898275	1.01631e+06	1675.32	640.206	1157.76	1.07792	0.0103958	0.0010915	-9.83947	down
XMW1444	C10H16O	Carvenone	Terpenoids	499-74-1	4.04893e+06	2.87946e+06	3.28402e+06	9	9	9	1.08166	0.00999471	2.64384e-06	-18.5289	down
XMW1320	C9H14O2	4-Isopropyl-1,3-cyclohexanedione	Ketone	62831-62-3	1.05832e+08	7.72992e+07	8.64979e+07	39206.8	219004	129105	1.06905	0.00866141	0.00143648	-9.44325	down
KMW0450	C8H10O2	Benzenemethanol, 4-methoxy-	Phenol	105-13-5	9	9	9	608921	559132	584027	1.0818	0.000605117	64891.8	15.9857	up
NMW0107	C9H7N	Isoquinoline	Heterocyclic compound	119-65-3	86694.2	62197	70652.1	4742.1	4000.91	4371.51	1.07855	0.0106726	0.0597355	-4.06527	down
XMW1141	C7H7NO2	1H-Pyrrole-2,5-dione, 3-ethenyl-4-methyl-	Heterocyclic compound	21494-57-5	1.79019e+07	1.23781e+07	1.42657e+07	94810	69574	82192	1.08024	0.0118358	0.00553535	-7.49711	down
XMW0937	C12H18O2	(1R,5S,6R)-2,7,7-Trimethylbicyclo[3.1.1]hept-2-en-6-yl acetate	Ester	67999-48-8	1.51353e+07	1.0488e+07	1.21313e+07	33817.6	49128.5	41473	1.08014	0.0115615	0.00329548	-8.2453	down
WMW0025	C10H14O	Thymol	Terpenoids	89-83-8	9207.58	6295.03	7227.97	295285	267611	281448	1.07975	0.000752839	37.1457	5.21512	up
NMW0110	C6H6N2O	Picolinamide	Heterocyclic compound	1452-77-3	9.18883e+07	6.42077e+07	7.36882e+07	57178	35942.1	46560.1	1.0807	0.0110707	0.000607875	-10.6839	down
XMW0939	C12H20O2	4-Hexen-1-ol, 5-methyl-2-(1-methylethenyl)-, acetate	Ester	25905-14-0	1.05263e+08	7.66157e+07	8.60041e+07	9	9	9	1.08172	0.00879906	1.0079e-07	-23.2421	down
XMW1330	C13H28	Dodecane, 3-methyl-	Hydrocarbons	17312-57-1	9	9	9	4.92812e+06	4.59323e+06	4.76068e+06	1.08181	0.000412107	528964	19.0128	up
KMW0458	C12H20O2	p-Menth-8-en-3-ol, acetate	Ester	89-49-6	8.15723e+07	5.77034e+07	6.60696e+07	1.23438e+06	1.13262e+06	1.1835e+06	1.08033	0.0106327	0.0172904	-5.85389	down
NMW0111	C11H17N	BenzeneethanAmine, N,.alpha.,.alpha.-trimethyl-	Amine	100-92-5	9	9	9	7.19099e+06	6.65747e+06	6.92423e+06	1.08181	0.000494372	769359	19.5533	up
NMW0112	C10H14O	Phenol, 2-(1,1-dimethylethyl)-	Phenol	88-18-6	3525.89	3333.65	4329.38	1.20269e+06	1.10783e+06	1.15526e+06	1.08131	0.000564188	309.751	8.27496	up
KMW0459	C10H16O	2,6-Octadienal, 3,7-dimethyl-, (E)-	Terpenoids	141-27-5	5.87477e+07	4.13916e+07	4.69919e+07	9	9	9	1.0817	0.0107	1.8351e-07	-22.3776	down
D422	C11H24O	Undecanol-5	Alcohol	37493-70-2	41724.5	21237	25168.4	2.5965e+07	2.35983e+07	2.47816e+07	1.07997	0.000760272	843.583	9.72039	up
D333	C12H18O2	(+)-cis-Verbenol, acetate	Ester	29135-27-1	9	9	9	5.09935e+06	4.71671e+06	4.90803e+06	1.0818	0.000506118	545337	19.0568	up
XMW0364	C11H24O	6-Undecanol	Alcohol	23708-56-7	9	9	9	6.13614e+06	5.68471e+06	5.91043e+06	1.08181	0.000485795	656714	19.3249	up
D299	C10H18O	Ethanol, 2-(3,3-dimethylcyclohexylidene)-, (Z)-	Alcohol	26532-23-0	1.05977e+08	7.74009e+07	8.6638e+07	9	9	9	1.08172	0.00863681	9.99942e-08	-23.2536	down
D222	C11H20O2	Hexanoic acid, 3-methyl-2-butenyl ester	Ester	76649-22-4	9	9	9	2.1622e+06	2.00611e+06	2.08415e+06	1.0818	0.000467101	231572	17.8211	up
XMW1391	C11H17N	Pyridine, 2-hexyl-	Heterocyclic compound	1129-69-7	9	9	9	3.47397e+07	32251843	3.34958e+07	1.08181	0.000459395	3.72175e+06	21.8276	up
XMW0108	C14H30	2,4-Dimethyldodecane	Hydrocarbons	6117-99-3	9	9	9	335246	310957	323102	1.0818	0.000470636	35900.2	15.1317	up
XMW1147	C10H16O	Tricyclo[2.2.1.0(2,6)]heptane-3-methanol, 2,3-dimethyl-	Terpenoids	29550-55-8	9	9	9	1.16014e+08	1.07811e+08	1.11913e+08	1.08181	0.000447479	1.24347e+07	23.5679	up
XMW1063	C4H4N6	4,4'-Bitriazolyl	Heterocyclic compound	16227-15-9	9	9	9	1.04944e+07	9.67017e+06	1.00823e+07	1.0818	0.000556523	1.12026e+06	20.0954	up
NMW0117	C11H8	Benzene, 2,4-pentadiynyl-	Aromatics	41268-41-1	9	9	9	3.08134e+06	2.83441e+06	2.95787e+06	1.0818	0.000580252	328652	18.3262	up
XMW1244	C11H22O2	Hexanoic acid, pentyl ester	Ester	540-07-8	403.24	1021.8	586.129	980213	904549	942381	1.07873	0.000537102	1405.72	10.4571	up
D170	C11H14O2	p-Tolyl isobutyrate	Ester	103-93-5	79557.7	42297.4	52604.8	952177	862250	907213	1.07235	0.000168763	15.6004	3.96351	up
D163	C10H14O2	dl-Camphoroquinone	Terpenoids	10373-78-1	52206.8	40692.1	30892.7	127420	114497	120959	1.04177	0.00102157	2.93135	1.55156	up
KMW0472	C8H7N	Indole	Heterocyclic compound	120-72-9	105746	48916.6	61943.6	4.72262e+06	4.39162e+06	4.55712e+06	1.07565	0.000311213	63.1162	5.97994	up
XMW0546	C11H21N	(5R,8aR)-5-Propyloctahydroindolizine	Heterocyclic compound	120057-35-4	9	9	9	179531	169302	174417	1.0818	0.000286516	19379.6	14.2423	up
XMW0287	C11H14O2	Benzoic acid, 2-methylpropyl ester	Ester	120-50-3	9645.5	5597.92	4635.34	90996.1	79972.2	85484.2	1.0667	0.000255233	12.9008	3.68939	up
XMW1086	C11H22O2	Butanoic acid, heptyl ester	Ester	5870-93-9	26851.6	17933.9	16286.8	432998	393747	413372	1.07639	0.000353506	20.3057	4.34381	up
XMW0614	C11H22O2	Nonanoic acid, ethyl ester	Ester	123-29-5	1094.92	551.39	668.952	45883.1	42902.9	44393	1.07663	0.000250517	57.5222	5.84605	up
KMW0475	C10H16O	(2E,4Z)-2,4-Decadienal	Aldehyde	25152-83-4	55629	26744	33338	2388709	2248456	2.31858e+06	1.07611	0.000177704	60.1131	5.90961	up
WMW0077	C13H24	1-Tridecyne	Hydrocarbons	26186-02-7	69362.5	35660.2	41848.9	2.56083e+06	2.3974e+06	2.47911e+06	1.07649	0.000211874	50.6384	5.66216	up
NMW0121	C10H14O	Phenol, 2-methyl-5-(1-methylethyl)-	Terpenoids	499-75-2	65694.4	36966.8	26929.2	2.67517e+06	2.43454e+06	2.55485e+06	1.07355	0.00056764	59.1445	5.88617	up
XMW0772	C8H10O3	1,3-Cyclopentanedione, 2-acetyl-4-methyl-	Ketone	4056-69-3	7185.21	3934.24	4360.38	141924	129549	135736	1.07512	0.000320272	26.3058	4.71731	up
D346	C11H16O2	Methyl 6,6-dimethylbicyclo[3.1.1]hept-2-ene-2-carboxylate	Ester	30649-97-9	9943.23	8549.01	6364.57	185835	188178	187007	1.07825	1.30353e-07	22.5701	4.49634	up
XMW0973	C9H13NO	Ketone, methyl 2,4,5-trimethylpyrrol-3-yl	Heterocyclic compound	19005-95-9	65803	41964	45715	289313	257010	273162	1.06719	7.02155e-05	5.33929	2.41665	up
D145	C11H14O2	Propanoic acid, 2-methyl-, phenylmethyl ester	Ester	103-28-6	4.89923e+06	2.29261e+06	2.84671e+06	1.86467e+08	1.74568e+08	1.80518e+08	1.07529	0.000199125	53.9474	5.75348	up
KMW0457	C8H9NO	Ethanone, 1-(2-aminophenyl)-	Ketone	551-93-9	4173.01	2375.86	2066.03	80368.9	72532.4	76450.7	1.07304	0.000409047	26.6227	4.73459	up
NMW0127	C10H18O2	6-Octenoic Acid, 3,7-dimethyl-	Acid	502-47-6	15143.6	11215.6	9853.17	311745	278058	294901	1.07837	0.000910232	24.431	4.61064	up
XMW0580	C15H32	Dodecane, 2,6,10-trimethyl-	Hydrocarbons	3891-98-3	55700.7	37360.2	41858.3	9	9	9	1.08133	0.0147323	0.00020012	-12.2868	down
XMW0456	C12H20O	5,8-Decadien-2-one, 5,9-dimethyl-, (E)-	Ketone	130876-99-2	19967.8	15281.2	11982.8	128303	115588	121945	1.07082	6.41912e-05	7.74554	2.95336	up
XMW0209	C10H16O	1,4-Cyclohexadiene-1-methanol, 4-(1-methylethyl)-	Alcohol	22539-72-6	1873.54	1034.94	592.185	9	9	9	1.07104	0.0911338	0.0077128	-7.01853	down
XMW1323	C9H8O2	2(3H)-Benzofuranone, 3-methyl-	Heterocyclic compound	32267-71-3	9	9	9	5795.23	5605.95	5700.59	1.08181	9.21608e-05	633.399	9.30697	up
NMW0141	C10H18O2	2,7-Octadiene-1,6-diol, 2,6-dimethyl-, (E)-	Terpenoids	75991-61-6	3490531	4868742	1987266	8469	7257	7863	1.07759	0.053798	0.00227989	-8.77682	down
XMW0954	C10H16O2	Cyclopropanecarboxylic Acid, 2,2-dimethyl-3-(2-methyl-1-propenyl)-, (1R-trans)-	Terpenoids	4638-92-0	9	9	9	2.29373e+06	2.13116e+06	2.21245e+06	1.0818	0.000449631	245827	17.9073	up
D138	C9H14O6	Triacetin	Ester	102-76-1	4339.77	2612.05	3045.96	28443.9	10618.4	19531.2	1.01151	0.0863622	5.86065	2.55106	up
NMW0144	C10H16O2	Neric Acid	Terpenoids	4613-38-1	23369.4	19846.3	18328.6	71527.6	41352.8	56440.2	1.02054	0.0504031	2.7512	1.46006	up
KMW0516	C12H20O2	.alpha.-Terpinyl acetate	Ester	80-26-2	2.58398e+06	1.5759e+06	1.55005e+06	5.55706e+06	5.06993e+06	5.31349e+06	1.0305	0.00424332	2.79171	1.48115	up
NMW0149	C10H16O2	Geranic acid	Terpenoids	459-80-3	305193	316292	208123	577033	530537	553785	1.01071	0.00789437	2.00258	1.00186	up
XMW0503	C8H10O3	2-Acetyl-1,3-cyclohexanedione	Ketone	4056-73-9	363134	241277	264133	1541.03	1460.65	1500.84	1.0805	0.0164443	0.00518398	-7.59172	down
w18	C10H18O2	2,7-Octadiene-1,6-diol, 2,6-dimethyl-, (Z)-	Alcohol	103619-06-3	134801	94084.4	97371.3	4065.9	4118.74	4092.32	1.07899	0.015214	0.0376298	-4.73198	down
KMW0540	C10H12O2	Eugenol	Phenol	97-53-0	1.01674e+06	1.45099e+06	1.81101e+06	45607.3	36513.3	41060.3	1.07654	0.0263826	0.028789	-5.11834	down
WMW0046	C11H22O	trans-2-Undecen-1-ol	Alcohol	75039-84-8	55866.4	37360.2	41858.3	5996.43	4947.76	5472.1	1.0732	0.0190267	0.121526	-3.04067	down
KMW0517	C11H20O	2-Undecenal, E-	Aldehyde	53448-07-0	2.19914e+06	1.53065e+06	1.6294e+06	20752.7	19261.2	20006.9	1.08033	0.0136261	0.0111996	-6.48041	down
w44	C11H20O4	Butanoic acid, 2-butoxy-1-methyl-2-oxoethyl ester	Ester	7492-70-8	663822	906023	410771	81492.3	83200.6	82346.4	1.05483	0.0561152	0.124729	-3.00314	down
KMW0588	C10H18O	3-Cyclohexene-1-ethanol, .beta.,4-dimethyl-	Alcohol	18479-68-0	49318.8	44966.2	30821	3.96333e+06	3.55908e+06	3.76121e+06	1.07964	0.000960115	90.1925	6.49494	up
GMW0087	C10H18O	(E)-2-Decenal	Aldehyde	3913-81-3	2.31696e+07	1.51962e+07	1.88906e+07	7127.27	4318.44	5722.85	1.08067	0.014268	0.000299854	-11.7035	down
KMW0556	C15H24	Naphthalene, decahydro-4a-methyl-1-methylene-7-(1-methylethenyl)-, [4aR-(4a.alpha.,7.alpha.,8a.beta.)]-	Terpenoids	17066-67-0	613576	451986	571728	3.3999e+06	2.91118e+06	3.15554e+06	1.07455	0.00119945	5.78188	2.53154	up
D425	C13H20O	3-Cyclohexene-1-carboxAldehyde, 4-(4-methyl-3-pentenyl)-	Aldehyde	37677-14-8	492181	434601	434357	1.32248e+06	1.19198e+06	1.25723e+06	1.07647	0.000334294	2.77098	1.47039	up
KMW0606	C15H24	.alpha.-Muurolene	Terpenoids	10208-80-7	6.68746e+07	4.33461e+07	4.90104e+07	1.51043e+06	1.13287e+06	1.32165e+06	1.07802	0.0182343	0.0249006	-5.32768	down
XMW0916	C11H15Br	(5-bromopentyl)-Benzene	Aromatics	14469-83-1	2.8087e+06	1.94781e+06	2.54502e+06	1.42031e+07	1.21783e+07	1.31907e+07	1.07159	0.000764119	5.4197	2.43821	up
KMW0581	C12H16O3	1,2,3-trimethoxy-5-(2-propenyl)-Benzene	Aromatics	487-11-6	2.07883e+06	1.91294e+06	1.81495e+06	5.27205e+06	4.73489e+06	5.00347e+06	1.07589	0.000450172	2.585	1.37017	up
XMW0455	C8H10O2	1,3-Benzenediol, 4,5-dimethyl-	Phenol	527-55-9	1.03545e+06	1.34774e+06	1.13403e+06	441584	468928	455256	1.06694	0.0155739	0.38831	-1.36472	down
KMW0568	C10H18O2	2H-Pyran-2-one, tetrahydro-6-pentyl-	Ester	705-86-2	11404.8	9900.18	10965.9	400100	398095	399097	1.08155	2.65183e-10	37.1014	5.2134	up
XMW0204	C16H34	Dodecane, 5,8-diethyl-	Hydrocarbons	24251-86-3	9000	7117	8551	68381	59099	63740	1.0783	0.00159658	7.75174	2.95452	up
D265	C12H23N	Dodecanenitrile	Nitrogen compounds	2437-25-4	880584	676579	602942	49555.7	46841.7	48198.7	1.07782	0.0149299	0.0669394	-3.901	down
KMW0614	C15H24	Cubenene	Terpenoids	29837-12-5	1.44713e+06	924854	1.0691e+06	440836	374543	407689	1.04279	0.0398307	0.355431	-1.49236	down
D369	C15H26O	Kessane	Terpenoids	3321-66-2	3.62991e+06	3.33455e+06	3.17347e+06	1.01473e+07	9.05395e+06	9.60062e+06	1.07671	0.000677573	2.841	1.5064	up
XMW1411	C15H24	1,3,6,10-Dodecatetraene, 3,7,11-trimethyl-, (Z,E)-	Terpenoids	26560-14-5	6.69086e+06	4.66196e+06	5.14883e+06	252423	193954	223188	1.07811	0.0131118	0.0405756	-4.62324	down
NMW0223	C6H6O3	1,2,4-Benzenetriol	Alcohol	533-73-3	2472.54	1795	1778.28	9	9	9	1.08085	0.0127447	0.0044659	-7.80683	down
WMW0021	C15H22	trans-Calamenene	Terpenoids	73209-42-4	784852	564613	631837	54152.5	44943.5	49548	1.0778	0.0110882	0.0750235	-3.73651	down
XMW0264	C15H24	Bicyclo[4.4.0]dec-1-ene, 2-isopropyl-5-methyl-9-methylene-	Terpenoids	150320-52-8	2.76383e+06	1.5853e+06	2.01896e+06	295108	214057	254582	1.06523	0.0317986	0.119933	-3.0597	down
NMW0215	C5H11NS3	N,N-Dimethyl-1,2,3-trithian-5-Amine	Heterocyclic compound	31895-21-3	1.23211e+06	857017	907732	68199.6	56678.9	62439.3	1.07733	0.0153186	0.0625047	-3.99989	down
XMW0136	C15H20	4-Isopropyl-6-methyl-1-methylene-1,2,3,4-tetrahydronaphthalene	Terpenoids	50277-34-4	326801	236821	264870	17926.8	14553.8	16240.3	1.0784	0.0102206	0.0588067	-4.08787	down
XMW0388	C15H24	(4aR,8aR)-5,8a-dimethyl-3-propan-2-ylidene-1,2,4,4a,7,8-hexahydronaphthalene	Terpenoids	6813-21-4	802171	627080	621048	1.56937e+06	1.40649e+06	1.48793e+06	1.05503	0.000580103	2.17715	1.12244	up
KMW0577	C10H16O2	2H-Pyran-2-one, 5,6-dihydro-6-pentyl-	Heterocyclic compound	54814-64-1	7161.87	10611.2	9498.59	111070	102255	106662	1.07657	0.000135302	11.7333	3.55254	up
KMW0595	C15H24	1,3-Cyclohexadiene, 5-(1,5-dimethyl-4-hexenyl)-2-methyl-, [S-(R*,S*)]-	Terpenoids	495-60-3	4.4378e+07	2.91222e+07	3.29884e+07	1.10113e+06	843808	972468	1.07816	0.0171197	0.0273964	-5.18987	down
KMW0604	C15H24	(1S,2E,6E,10R)-3,7,11,11-Tetramethylbicyclo[8.1.0]undeca-2,6-diene	Terpenoids	24703-35-3	7.09538e+06	4.91722e+06	5.38304e+06	329452	357733	343593	1.07815	0.0144084	0.059255	-4.07692	down
KMW0619	C14H24O2	Butanoic acid, 3,7-dimethyl-2,6-octadienyl ester, (E)-	Ester	106-29-6	715896	720883	676388	357417	329037	343227	1.0778	0.000125544	0.487269	-1.03721	down
D177	C15H24O	(1aR,1bS,2aS,5S,5aS,7aS)-2,2,5,7a-Tetramethyldecahydrocyclopenta[2',3']cyclobuta[1',2':3,4]benzo[1,2-b]oxirene	Terpenoids	104188-24-1	1.02338e+06	944942	897048	2.54691e+06	2.28579e+06	2.41635e+06	1.0758	0.000498994	2.52988	1.33907	up
NMW0218	C10H15NO	Hordenine	Amine	539-15-1	211007	167086	169233	33534.2	32387.4	32960.8	1.07731	0.00899463	0.180665	-2.46861	down
KMW0599	C13H26O2	Dodecanoic acid, methyl ester	Ester	111-82-0	1793.89	1341.31	749.583	17910.8	13960.4	15935.6	1.05956	0.00385038	12.3062	3.62131	up
NMW0239	C10H16O3	2(3H)-Furanone, dihydro-5,5-dimethyl-4-(3-oxobutyl)-	Heterocyclic compound	4436-81-1	82498.5	79215.4	75423.6	211878	188536	200207	1.07729	0.00153739	2.5328	1.34073	up
XMW1095	C14H22	Benzene, 1,2-diethyl-3,4,5,6-tetramethyl-	Aromatics	33884-69-4	13640.9	13002.1	12021.4	30249.9	27335.8	28792.9	1.07455	0.000371013	2.23406	1.15967	up
XMW0836	C15H26O	3,7-Cyclodecadiene-1-methanol, .alpha.,.alpha.,4,8-tetramethyl-, [s-(Z,Z)]	Terpenoids	21657-90-9	95789.5	91497.6	86468.8	230448	212940	221694	1.07806	0.000165493	2.42947	1.28064	up
XMW0265	C17H36	Tetradecane, 2,6,10-trimethyl-	Hydrocarbons	14905-56-7	60384.6	50159.8	50795.4	127791	115352	121572	1.0679	0.000162603	2.26054	1.17667	up
XMW0027	C15H26O	Ledol	Terpenoids	577-27-5	164959	183621	141411	32953.8	28629.3	30791.5	1.07611	0.00787779	0.188523	-2.40719	down
KMW0633	C13H28O	n-Tridecan-1-ol	Alcohol	112-70-9	54526.9	52781.3	49628.9	124469	114788	119628	1.07774	0.000230095	2.28681	1.19333	up
XMW0151	C15H24	Epizonarene	Terpenoids	41702-63-0	158395097	104229663	118365982	4.09313e+06	2.97666e+06	3.53489e+06	1.07777	0.0167962	0.0278345	-5.16698	down
D300	C15H24	Aristolochene	Terpenoids	26620-71-3	4.08026e+06	2.75892e+06	3.38084e+06	1.66391e+07	1.40531e+07	1.53461e+07	1.06795	0.000779104	4.50471	2.17144	up
D423	C12H14O2	Benzyl tiglate	Ester	37526-88-8	4.2484e+07	2.91567e+07	3.23568e+07	1.61201e+06	1.10797e+06	1.35999e+06	1.07682	0.0141427	0.0392313	-4.67185	down
XMW1020	C11H15BrO	(3-Bromo-1-methylpropoxymethyl)benzene	Aromatics	51666-29-6	4.22215e+07	2.8791e+07	3.20717e+07	1.2814e+06	886817	1.08411e+06	1.07743	0.0143823	0.0315502	-4.98621	down
WMW0218	C15H24O	Butylated Hydroxytoluene	Aromatics	128-37-0	306194	173324	218878	42162.6	34915	38538.8	1.06137	0.0376514	0.165545	-2.5947	down
KMW0618	C15H24	Naphthalene, 1,2,3,5,6,8a-hexahydro-4,7-dimethyl-1-(1-methylethyl)-, (1S-cis)-	Terpenoids	483-76-1	2.98017e+06	1.80019e+06	2.2404e+06	119929	94798	107363	1.07581	0.0229154	0.0458768	-4.44609	down
XMW0788	C9H9NO4	Phenol, 4-methyl-2-nitro-, acetate (ester)	Ester	54646-55-8	4028.9	3728.57	3282.63	13817.5	11076.8	12447.1	1.07084	0.00522468	3.38234	1.75802	up
NMW0209	C11H20O2	Undecylenic Acid	Acid	112-38-9	698604	466031	651767	4.13585e+06	3.52402e+06	3.82993e+06	1.07088	0.000927991	6.32558	2.6612	up
KMW0613	C15H24	.alpha.-Farnesene	Terpenoids	502-61-4	471365	260366	336610	1.62449e+06	1.42945e+06	1.52697e+06	1.05302	0.000158197	4.28787	2.10026	up
D213	C12H8O	2,4-Hexadiyn-1-one, 1-phenyl-	Ketone	495-74-9	5068.11	3844.85	5510.08	9939.87	9362.02	9650.94	1.03295	0.00588459	2.0074	1.00533	up
XMW1170	C15H26O2	Butanoic acid, 2-methyl-, 3,7-dimethyl-2,6-octadienyl ester, (Z)-	Terpenoids	51117-19-2	69710.7	67015.5	65973.6	143521	128286	135904	1.07593	0.00260934	2.01141	1.0082	up
NMW0248	C12H16O3	.gamma.-Asarone	Aromatics	5353-15-1	40615.8	35331.1	33211.2	94891.5	84358.5	89625	1.06976	0.00025445	2.46317	1.30052	up
NMW0211	C10H14O2	1-Cyclohexene-1-carboxylic acid, 4-(1-methylethenyl)-	Terpenoids	7694-45-3	108437	73426	94141.7	551986	458478	505232	1.07038	0.00164859	5.49155	2.45721	up
D403	C13H18O2	Benzeneacetic acid, 4-(1,1-dimethylethyl)-, methyl ester	Ester	3549-23-3	19025.4	12893.5	13887.2	2495.82	2275.4	2385.61	1.07219	0.0209693	0.156242	-2.67815	down
KMW0598	C13H26O	Tridecanal	Aldehyde	10486-19-8	6038.79	6055.91	5079.7	796226	692638	744432	1.08137	0.00163289	130.036	7.02277	up
NMW0227	C15H24	(Z)-1-Methyl-4-(6-methylhept-5-en-2-ylidene)cyclohex-1-ene	Terpenoids	13062-00-5	214251	200061	180227	1.45794e+06	1.20741e+06	1.33267e+06	1.07856	0.00352267	6.72458	2.74944	up
XMW0703	C14H28O2	Hexanoic acid, octyl ester	Ester	4887-30-3	4081.19	3603.26	3334.62	9469.21	7865.38	8667.29	1.06379	0.00283647	2.35972	1.23861	up
WMW0013	C15H24	Bicyclosesquiphellandrene	Terpenoids	54324-03-7	4.03944e+06	2.68566e+06	3.15986e+06	8.45145e+06	6.98895e+06	7.7202e+06	1.03559	0.00160195	2.34301	1.22837	up
XMW0176	C15H24	[1α,4aα,8aα]-1,2,4a,5,6,8a-hexahydro-4-7-dimethyl-1-[1-methylethyl]naphthalene	Terpenoids	31983-22-9	6.47558e+07	4.35964e+07	4.92368e+07	1.89669e+06	1.45246e+06	1.67457e+06	1.07819	0.0150943	0.0318786	-4.97127	down
WMW0003	C15H24	Eremophilene	Terpenoids	10219-75-7	1.2663e+07	8.60711e+06	9.69028e+06	604956	515851	560404	1.07784	0.0150519	0.054302	-4.20285	down
XMW0097	C14H22	1,5-Cycloundecadiene, 8,8-dimethyl-9-methylene-	Hydrocarbons	62338-54-9	3.7974e+06	2.48471e+06	3.37629e+06	1.55864e+07	1.31004e+07	1.43434e+07	1.06468	0.000752619	4.45521	2.15549	up
w40	C12H22O2	6,7-Dodecanedione	Ketone	13757-90-9	86600.6	100757	85354.6	27740.8	29751	28745.9	1.07654	0.00571825	0.316223	-1.66099	down
XMW1091	C10H20O3	1-Pentanol, 5-[(tetrahydro-2H-pyran-2-yl)oxy]-	Heterocyclic compound	76102-74-4	14751.3	9770.16	15192.2	53924.6	50403	52163.8	1.05942	0.000191441	3.94049	1.97838	up
NMW0213	C10H10N2	Nicotyrine	Heterocyclic compound	487-19-4	9	9	9	25211	21359	23285	1.08171	0.00227453	2587.22	11.3372	up
NMW0214	C9H10O2	3-(4-Hydroxyphenyl)propanal	Aldehyde	20238-83-9	1.26023e+07	8.55541e+06	9.54198e+06	626040	559861	592951	1.07785	0.0155798	0.0579436	-4.10921	down
XMW0817	C15H24	(1S,5S,6R)-6-Methyl-2-methylene-6-(4-methylpent-3-en-1-yl)bicyclo[3.1.1]heptane	Terpenoids	15438-94-5	7.34994e+06	5.16692e+06	5.59385e+06	292843	228585	260714	1.07815	0.0130597	0.0431867	-4.53327	down
D103	C14H20O2	Butanoic acid, 1,1-dimethyl-2-phenylethyl ester	Ester	10094-34-5	1.23647e+06	862161	914163	73664.5	62207.2	67935.8	1.07726	0.0152167	0.0676473	-3.88582	down
KMW0583	C13H20O	trans-.beta.-Ionone	Terpenoids	79-77-6	13733.1	10557.2	11735.1	86504.1	72551.5	79527.8	1.07682	0.00238417	6.62265	2.72741	up
D328	C15H22	(5R,10R)-10-Methyl-6-methylene-2-(propan-2-ylidene)spiro[4.5]dec-7-ene	Terpenoids	28908-27-2	4.77353e+06	3.32334e+06	3.65852e+06	168652	271422	220037	1.07358	0.0134463	0.0561539	-4.15447	down
NMW0216	C9H10O3	BenzAldehyde, 3,4-dimethoxy-	Aldehyde	120-14-9	133990	172211	147130	54856.8	60957.8	57907.3	1.06729	0.0125589	0.383212	-1.38379	down
NMW0219	C13H19NO	Diethylpropion	Amine	90-84-6	1534.65	1191.77	1703.74	25165.4	24063	24614.2	1.07871	1.25925e-05	16.6682	4.05902	up
XMW0700	C15H24	4a,8-Dimethyl-2-(prop-1-en-2-yl)-1,2,3,4,4a,5,6,7-octahydronaphthalene	Terpenoids	103827-22-1	1.29152e+06	825352	945470	90241.7	70604.5	80423.1	1.07415	0.0212308	0.0787859	-3.66592	down
D338	C15H24	1-methyl-4-(1,2,2-trimethylcyclopentyl)cyclohexa-1,3-diene	Terpenoids	29621-78-1	2.21121e+06	1.17617e+06	1.54047e+06	9.04216e+06	7.80176e+06	8.42196e+06	1.05566	0.000158188	5.12715	2.35816	up
KMW0601	C10H12O2	2-Butanone, 4-(4-hydroxyphenyl)-	Ketone	5471-51-2	98626.3	94495.7	89848.4	216040	194839	205439	1.0761	0.000884864	2.17803	1.12302	up
XMW0646	C13H20O3	2-Benzofurancarboxylic acid, 2,4,5,6,7,7a-hexahydro-4,4,7a-trimethyl-, methyl ester, cis-	Ester	77383-92-7	23126	22078	23415	86554	80491	83522.5	1.08078	0.000476873	3.65158	1.86852	up
XMW0975	C15H24	4-(1,5-dimethyl-1,4-hexadienyl)-1-methyl-Cyclohexene	Terpenoids	17627-44-0	214801	200578	180227	1.15374e+06	959832	1.05678e+06	1.07765	0.00335336	5.3229	2.41221	up
D216	C14H22O	.alpha.-Irone	Terpenoids	79-69-6	156811	99237.3	122083	27221.7	20451.4	23836.6	1.06301	0.0244902	0.189113	-2.40268	down
XMW1364	C15H26	7-Octylidenebicyclo[4.1.0]heptane	Terpenoids	82253-11-0	195101	121477	148589	18417.5	14514.5	16466	1.07158	0.0229722	0.106194	-3.23523	down
KMW0626	C15H22	Naphthalene, 1,2,3,4-tetrahydro-1,6-dimethyl-4-(1-methylethyl)-, (1S-cis)-	Terpenoids	483-77-2	40981.9	27023.1	33026.9	4303.09	2872.64	3587.87	1.06991	0.0167676	0.106537	-3.23058	down
NMW0230	C5H8N2O2	5,6-Dihydro-5-methyluracil	Heterocyclic compound	696-04-8	8623.85	4068.04	6082.51	9	9	9	1.07929	0.0417235	0.00143813	-9.44159	down
NMW0233	C10H14N2	Anabasine	Heterocyclic compound	494-52-0	12905.8	5844.65	6949.78	93084.9	77988.8	85536.8	1.05943	0.000605556	9.98477	3.31973	up
XMW0958	C11H23I	1-Iodoundecane	Halogenated hydrocarbons	4282-44-4	55841.9	60651.3	52124.1	269236	226323	247779	1.07737	0.0031217	4.40843	2.14027	up
XMW0157	C15H24O	(2R,3R,6S)-6-Isopropyl-3-methyl-2-(prop-1-en-2-yl)-3-vinylcyclohexanone	Terpenoids	39020-72-9	7940.88	6262.94	5934.96	51767.8	42953.1	47360.4	1.07583	0.00253024	7.05511	2.81867	up
KMW0630	C15H26O	1,6,10-Dodecatrien-3-ol, 3,7,11-trimethyl-, (E)-	Terpenoids	40716-66-3	717717	722935	677613	358066	330014	344040	1.07781	0.000144751	0.487248	-1.03727	down
D178	C15H24O	(1R,3aR,5aR,9aS)-1,4,4,7-Tetramethyl-1,2,3,3a,4,5a,8,9-octahydrocyclopenta[c]benzofuran	Terpenoids	104188-25-2	95953.5	79181.5	89835.9	249691	232944	241317	1.07435	2.42979e-05	2.7322	1.45006	up
XMW1006	C15H24O	(1S,4R,7S,8R,11R,13R)-4,7,11-Trimethyl-5-oxatetracyclo[5.4.2.01,8.04,13]tridecane	Terpenoids	18319-31-8	802665	754798	726795	1.83856e+06	1.66475e+06	1.75166e+06	1.07671	0.000612558	2.30052	1.20196	up
NMW0234	C7H6O4	Patulin	Heterocyclic compound	149-29-1	1.32204e+06	1.23535e+06	1.19056e+06	3.17917e+06	2.87471e+06	3.02694e+06	1.07696	0.000580327	2.42288	1.27672	up
D347	C14H28O2	n-Capric acid isobutyl ester	Ester	30673-38-2	146668	139413	130119	359727	329053	344390	1.07703	0.000217606	2.48239	1.31173	up
NMW0235	C11H8O	1-NaphthalenecarboxAldehyde	Aldehyde	66-77-3	56900.1	42576.3	46358.4	4201.46	3260.34	3730.9	1.07762	0.0087869	0.0767491	-3.70371	down
XMW0592	C16H34	Pentadecane, 4-methyl-	Hydrocarbons	2801-87-8	15131.5	14554.5	12125.3	32817.8	29551.5	31184.6	1.06402	0.000197602	2.23753	1.16191	up
XMW0087	C13H18O2	1-Pentanone, 1-(p-anisyl)-3-methyl-	Ketone	66333-82-2	62711.6	56120.9	54399.8	139449	129876	134663	1.07517	3.53238e-05	2.33206	1.2216	up
D438	C15H22O	Sesquirosefuran	Heterocyclic compound	39007-93-7	29215.9	29528.4	25573.3	66372.7	60431.8	63402.3	1.07262	0.000135967	2.25584	1.17366	up
KMW0622	C15H24	Cyclohexene, 3-(1,5-dimethyl-4-hexenyl)-6-methylene-, [S-(R*,S*)]-	Terpenoids	20307-83-9	88116.4	54544.7	68941.9	9	9	9	1.08124	0.0184852	0.000127597	-12.9361	down
XMW0841	C13H16O2	1-Penten-3-one, 1-(4-methoxyphenyl)-4-methyl-	Ketone	103-13-9	155032	141823	141786	361072	332720	346896	1.07772	0.000186736	2.37252	1.24642	up
WMW0043	C15H26O	d-Nerolidol	Terpenoids	142-50-7	1.26414e+06	1.18599e+06	1.11558e+06	3.05907e+06	2.77207e+06	2.91557e+06	1.07626	0.000343518	2.453	1.29455	up
XMW0471	C13H16O2	3-Hexen-1-ol, benzoate, (Z)-	Ester	25152-85-6	57475.6	50712.6	54322.8	122226	110186	116206	1.07372	0.00043908	2.1452	1.10111	up
XMW0842	C15H26O	Palustrol (Ledum)	Terpenoids	5986-49-2	46698.7	46256.5	42339.7	104052	91399	97725.4	1.07327	0.0018994	2.16694	1.11566	up
NMW0245	C11H15NO2	N-Methyl-3,4-methylenedioxyamphetAmine	Amine	42542-10-9	2294.56	1759.8	1331.39	5761.08	4380.55	5070.82	1.02677	0.00374123	2.82457	1.49803	up
XMW0843	C15H26O	(2E,4S,7E)-4-Isopropyl-1,7-dimethylcyclodeca-2,7-dienol	Alcohol	198991-79-6	104872	100575	94332	265096	236379	250738	1.07663	0.00110362	2.50922	1.32724	up
D337	C15H24O	2H-2a,7-Methanoazuleno[5,6-b]oxirene, octahydro-3,6,6,7a-tetramethyl-	Terpenoids	29597-36-2	123429	147259	123512	45710.6	40204.6	42957.6	1.07375	0.00625914	0.326922	-1.61298	down
NMW0256	C14H22O	Phenol, 4-(1,1,3,3-tetramethylbutyl)-	Phenol	140-66-9	740171	601509	613604	9	9	9	1.08171	0.00459696	1.38087e-05	-16.1441	down
XMW0389	C15H26O	Caryophyllenyl alcohol	Terpenoids	913176-41-7	24791.4	25901	24055.3	56066.6	52158.2	54112.4	1.07852	0.000235446	2.1718	1.11889	up
XMW0997	C15H24O2	Bornyl tiglate	Ester	101223-92-1	22704.8	25551.7	21118.6	133454	113367	123410	1.07766	0.00227488	5.33666	2.41594	up
XMW1264	C15H26O2	Acetic acid, 1-methyl-3-(2,6,6-trimethylcyclohex-1-enyl)propyl ester	Ester	86756-12-9	23320.1	21180.9	20087.5	10904.7	9958.1	10431.4	1.0711	0.00443154	0.484516	-1.04538	down
NMW0301	C8H9NO2	Acetaminophen	Phenol	103-90-2	252433	295592	460511	1.14125e+06	990551	1.0659e+06	1.03216	0.00121392	3.17064	1.66477	up
XMW1161	C10H12O3	4',6'-Dihydroxy-2',3'-dimethylacetophenone	Ketone	7743-14-8	10803.2	12370.1	12191.1	2210.04	2698.78	2454.41	1.07729	0.0014895	0.20821	-2.26389	down
XMW0557	C12H12OS	3-Acetyl-2,5-dimethylbenzo(b)thiophene	Heterocyclic compound	6179-04-0	22248.3	23553.7	32873	104845	88001.5	96423.4	1.06017	0.000552397	3.67677	1.87844	up
D398	C16H30O2	5-Tetradecen-1-ol, acetate, (Z)-	Ester	35153-13-0	188557	256090	202755	120341	87572.4	103957	1.01969	0.0184972	0.481727	-1.05371	down
KMW0645	C15H26O	Levomenol	Terpenoids	23089-26-1	140501	196178	276848	630101	535944	583023	1.01307	0.00228053	2.85084	1.51139	up
XMW0749	C16H30	8-Hexadecyne	Hydrocarbons	19781-86-3	54706.2	68372.5	98121.4	222147	192109	207128	1.02627	0.00174278	2.80914	1.49013	up
NMW0268	C9H8O3	2-Propenoic Acid, 3-(2-hydroxyphenyl)-	Acid	583-17-5	16594.8	12550.5	11692.2	6698.02	5088.06	5893.04	1.03006	0.0277032	0.432913	-1.20785	down
XMW0105	C12H12N2O	Ethanone, 1-(5-methyl-1-phenyl-1H-pyrazol-4-yl)-	Heterocyclic compound	6123-63-3	6763.73	7942.89	8919.73	9	9	9	1.08157	0.00621967	0.00114279	-9.77322	down
NMW0303	C10H13N3	Debrisoquine	Heterocyclic compound	1131-64-2	49491.4	43704.2	60705.1	9	9	9	1.08157	0.009334	0.000175438	-12.4768	down
XMW0017	C17H34O2	Hexadecanoic acid, methyl ester	Ester	112-39-0	1164.64	1162.97	1836.1	35315.9	30824.4	33070.2	1.07641	0.00127466	23.8274	4.57455	up
NMW0270	C13H10O	Benzophenone	Ketone	119-61-9	963646	808419	1009451	9	9	9	1.08174	0.00427705	9.70694e-06	-16.6526	down
NMW0308	C15H22O	2,6,9,11-Dodecatetraenal, 2,6,10-trimethyl-	Terpenoids	4955-32-2	38763.4	34074.3	40983.2	20222.8	16375.9	18299.4	1.05594	0.00307816	0.48232	-1.05194	down
XMW0480	C16H14O2	(Z)-Cinnamyl benzoate	Ester	117204-78-1	9	9	9	3835.3	3295.61	3565.45	1.08167	0.00191353	396.162	8.62994	up
WMW0203	C16H30O2	Palmitoleic Acid	Acid	373-49-9	7540	3023	8358	9	9	9	1.0764	0.062904	0.00142699	-9.45281	down
D126	C15H14O2	Benzeneacetic acid, phenylmethyl ester	Ester	102-16-9	4741	4379	5553	9	9	9	1.08158	0.00501703	0.00184011	-9.08599	down
D383	C18H34O2	11-Hexadecen-1-ol, acetate, (Z)-	Ester	34010-21-4	9	9	9	1415.02	1269.08	1342.05	1.08171	0.000997257	149.117	7.2203	up
D404	C12H20O2	Hexahydro-3-butylphthalide	Heterocyclic compound	3553-34-2	30242.6	28148.9	28656.9	12100.1	14093	13096.5	1.07338	5.17288e-05	0.451354	-1.14767	down
WMW0119	C15H22O2	Benzoic acid, 2-ethylhexyl ester	Ester	5444-75-7	5964.93	9044.85	6501.08	36220.7	31521.8	33871.2	1.06627	0.000179445	4.72383	2.23996	up
KMW0699	C18H38	Octadecane	Hydrocarbons	593-45-3	7987.07	10230	9299.57	9	9	9	1.08163	0.00500329	0.000981225	-9.99313	down
XMW0754	C15H22O	Methanol, (cyclohexyl)(2,3-dimethylphenyl)-	Alcohol	349498-47-1	4297.41	4842.71	4690.97	1494.98	1666.66	1580.82	1.0776	0.0014017	0.342884	-1.54421	down
XMW0165	C15H26O	Cyclohexanol, 3-ethenyl-3-methyl-2-(1-methylethenyl)-6-(1-methylethyl)-, [1R-(1.alpha.,2.alpha.,3.beta.,6.alpha.)]-	Terpenoids	35727-45-8	142143	136895	193166	23512.4	21360.6	22436.5	1.07483	0.0171311	0.142543	-2.81053	down
NMW0280	C15H26O2	2-Furanmethanol, tetrahydro-.alpha.,.alpha.,5-trimethyl-5-(4-methyl-3-cyclohexen-1-yl)-, [2S-[2.alpha.,5.beta.(R*)]]-	Terpenoids	26184-88-3	30820.1	33174.5	38372.5	3792.09	4947.7	4369.9	1.0767	0.00480061	0.128066	-2.96505	down
XMW1421	C13H16O3	3,4-Hexanedione, 1-(phenylmethoxy)-	Ketone	118006-73-8	7218.35	10845.8	10608.9	156465	130452	143458	1.07564	0.002587	15.0097	3.90783	up
NMW0327	C8H8O4	Benzoic Acid, 2,4-dihydroxy-6-methyl-	Acid	480-64-8	4826.3	7338.3	5826.94	1836.4	1480.79	1658.6	1.05845	0.0252762	0.276563	-1.85432	down
WMW0096	C15H32O	n-Pentadecanol	Alcohol	629-76-5	5868.54	6737.98	7263.85	2682.61	1299.52	1991.06	1.02088	0.00124898	0.300608	-1.73404	down
NMW0447	C15H22N2O	Mepivacaine	Heterocyclic compound	96-88-8	9	9	9	1014.3	662.772	838.537	1.0801	0.014637	93.1708	6.54181	up
KMW0661	C15H26O	.alpha.-Bisabolol	Terpenoids	515-69-5	247700	292438	455222	1.18227e+06	1.00997e+06	1.09612e+06	1.03393	0.000875039	3.30369	1.72408	up
XMW0092	C20H42	Hexadecane, 2,6,10,14-tetramethyl-	Hydrocarbons	638-36-8	12663.1	13012.7	9305.43	9	9	9	1.08128	0.0101321	0.000771841	-10.3394	down
NMW0344	C14H26O2	Myristoleic Acid	Acid	544-64-9	10557.8	15415.8	13743.9	9	9	9	1.08137	0.0114017	0.000679803	-10.5226	down
NMW0001	C19H36O2	9-Octadecenoic acid (Z)-, methyl ester	Ester	112-62-9	9	9	9	2495.18	2201.7	2348.44	1.0817	0.00130886	260.938	8.02756	up
KMW0726	C14H30O	1-Tetradecanol	Alcohol	112-72-1	71828.8	55222.7	41908	7031.06	6063.56	6547.31	1.06935	0.0288224	0.116252	-3.10467	down
XMW0050	C15H24O	Isospathulenol	Terpenoids	88395-46-4	628832	532216	662587	9	9	9	1.08174	0.00410483	1.48056e-05	-16.0435	down
KMW0665	C16H32O2	n-Butyl laurate	Ester	106-18-3	10513.2	10856.1	12077.7	1771.68	2099.56	1935.62	1.07888	0.00191716	0.173613	-2.52605	down
XMW1037	C15H22O	Phenol, 5-(1,5-dimethyl-4-hexenyl)-2-methyl-, (R)-	Phenol	30199-26-9	8497.85	11601.7	9307.5	4391.28	3226.83	3809.06	1.0446	0.0146813	0.388586	-1.36369	down
w35	C15H20O2	Hexanoic acid, 3-phenyl-2-propenyl ester	Ester	6994-20-3	2657.15	3015.04	3349.53	1042.62	773.332	907.978	1.06491	0.00408412	0.30193	-1.72771	down
WMW0144	C17H34	1-Heptadecene	Hydrocarbons	6765-39-5	41995	50393.5	77037.9	172054	150571	161313	1.02339	0.00250702	2.85633	1.51416	up
NMW0299	C15H24O	Santalol, E-cis,epi-.beta.-	Terpenoids	14490-17-6	47577.8	51592.3	84668.2	190235	168493	179364	1.02607	0.00281843	2.92699	1.54942	up
XMW0146	C12H18O2	(3S,3aR)-3-Butyl-3a,4,5,6-tetrahydroisobenzofuran-1(3H)-one	Ester	4567-33-3	16574.8	19590	16614.4	4438.67	3606.1	4022.39	1.07549	0.00366024	0.228635	-2.12888	down
XMW0750	C14H26O	(E)-Tetradec-2-enal	Aldehyde	51534-36-2	8400.27	7980.38	5786.64	9	9	9	1.08109	0.0118427	0.00121801	-9.68126	down
KMW0647	C13H20O3	Methyl jasmonate	Ester	1211-29-6	453605	379832	467312	7953.1	7399.49	7676.29	1.08121	0.00404242	0.0177043	-5.81975	down
NMW0266	C12H16O3	.beta.-Asarone	Aromatics	5273-86-9	84919.3	72282.6	89671.5	9	9	9	1.08171	0.00395327	0.000109368	-13.1585	down
XMW0507	C11H16O2	1,3-Benzenediol, 5-pentyl-	Phenol	500-66-3	4728.74	5563.75	7914.81	9	9	9	1.08074	0.0238884	0.00148292	-9.39734	down
w14	C16H34O	Octane, 1,1'-oxybis-	Hydrocarbons	629-82-3	6567.8	9351.48	12496.2	27501.6	22229.8	24865.7	1.00554	0.00268236	2.62523	1.39245	up
NMW0289	C13H26O2	Tridecanoic Acid	Acid	638-53-9	1889.53	2531.34	2547.14	10824.2	10357.7	10591	1.07242	2.68904e-05	4.55982	2.18898	up
XMW0751	C15H24O	Bergamotol, Z-.alpha.-trans-	Terpenoids	88034-74-6	206503	247032	259250	86906.2	76475.6	81690.9	1.07073	0.0084762	0.343824	-1.54026	down
D119	C14H20O	2-Benzylidene-1-heptanol	Alcohol	101-85-9	246850	244899	214403	1.7336e+06	1.46593e+06	1.59976e+06	1.0792	0.0027623	6.7964	2.76477	up
w24	C13H20O3	3-Buten-2-one, 4-(4-hydroxy-2,2,6-trimethyl-7-oxabicyclo[4.1.0]hept-1-yl)-	Ketone	38274-01-0	7954.82	9814	16277.4	41489.2	34016.8	37753	1.01907	0.00149208	3.32663	1.73406	up
XMW1022	C15H22O	3,7-Cyclodecadien-1-one, 3,7-dimethyl-10-(1-methylethylidene)-, (E,E)-	Terpenoids	6902-91-6	62197.9	69343.9	107084	224839	194088	209464	1.02205	0.00270694	2.63337	1.39691	up
KMW0683	C17H36	Heptadecane	Hydrocarbons	629-78-7	27993.6	32353.8	35564.9	1842.23	5599.86	3721.05	1.03697	0.00157602	0.116389	-3.10297	down
XMW1021	C15H22O	1,7-Dimethyl-4-(propan-2-ylidene)tricyclo[4.4.0.02,7]decan-3-one	Terpenoids	62332-96-1	6277.2	8788.22	6559.57	3214.56	2551.34	2882.95	1.04368	0.0266373	0.399947	-1.32212	down
NMW0003	C15H22O	2,6,9,11-Dodecatetraenal, 2,6,10-trimethyl-, (E,E,E)-	Terpenoids	17909-77-2	39227.6	48953.2	41891.2	9750.29	10305.2	10027.7	1.07729	0.00735402	0.231281	-2.11228	down
XMW0134	C20H42	Hexadecane, 2,6,11,15-tetramethyl-	Hydrocarbons	504-44-9	6824.68	9473.19	8958.67	1637.38	531.735	1084.56	1.03082	0.00586965	0.128825	-2.95651	down
XMW0208	C16H32O2	Octanoic acid, octyl ester	Ester	2306-88-9	18659.1	20872.4	21328.1	3273.49	3539.28	3406.39	1.08037	0.00220834	0.167914	-2.57421	down
NMW0347	C16H26O2	2,6,10-Dodecatrienoic acid, 3,7,11-trimethyl-, methyl ester, (E,E)-	Ester	3675-00-1	58450	64459.6	69759.2	10725.5	8186.53	9456.02	1.07705	0.00242948	0.147237	-2.76378	down
D251	C20H32	Hibaene	Terpenoids	2359-73-1	16112	6886	18960	9	9	9	1.07777	0.0617421	0.000643501	-10.6018	down
XMW1441	C12H15N3S	Thiazol-2-Amine, N-(4-dimethylaminobenzyl)-	Heterocyclic compound	13159-95-0	9	9	9	5890	1681.34	3785.67	1.0733	0.0897707	420.63	8.71641	up
XMW1362	C19H38O	Oxirane, heptadecyl-	Heterocyclic compound	67860-04-2	134623	64029	147206	9	9	9	1.08009	0.0469008	7.80667e-05	-13.6449	down
XMW1357	C14H24O2	(Z)-Oxacyclopentadec-6-en-2-one	Ketone	63958-52-1	9	9	9	1997.33	2544.49	2270.91	1.08152	0.00484104	252.323	7.97913	up
D127	C16H16O3	Benzeneacetic acid, (4-methoxyphenyl)methyl ester	Ester	102-17-0	9	9	9	3847.38	5085.08	4466.23	1.08151	0.00636448	496.248	8.95492	up
NMW0435	C8H8N2O3S	Zonisamide	Heterocyclic compound	68291-97-4	2885.45	1291.06	1879.5	11717.6	12620.4	12169	1.04946	0.000237769	6.02821	2.59173	up
XMW1458	C15H20O4	Pentandioic Acid, (p-t-butylphenyl) ester	Acid	212762-88-4	9	9	9	995.049	846.526	920.788	1.08155	0.00220382	102.31	6.6768	up
D377	C18H37Cl	Octadecane, 1-chloro-	Halogenated hydrocarbons	3386-33-2	568.697	828.871	699.073	10182.8	5989.05	8085.93	1.06868	0.0254466	11.5698	3.5323	up
KMW0727	C21H44	Heneicosane	Hydrocarbons	629-94-7	386.631	862.324	717.22	9930	5899	7914.5	1.05444	0.0233906	12.076	3.59407	up
XMW0877	C23H46	9-Tricosene, (Z)-	Hydrocarbons	27519-02-4	9	9	9	1941.3	1751.17	1846.24	1.08173	0.000891302	205.137	7.68045	up

## Sheet: F1TH-1 vs F1TH-4
Index	Formula	Compounds	Class I	CAS	F1TLeaf-1	F1TLeaf-2	F1TLeaf-3	F1TFlower-1	F1TFlower-2	F1TFlower-3	VIP	P-value	Fold_Change	Log2FC	Type
XMW1056	C6H10O2	2-Butenoic acid, ethyl ester, (Z)-	Ester	6776-19-8	3348.97	6800.57	4001.54	132027	135413	118691	1.11218	0.00114901	27.2864	4.77011	up
XMW0225	C4H8OS	Thiirane, (methoxymethyl)-	Heterocyclic compound	19858-14-1	6851.13	8482.74	6122.92	71065.2	64705.9	112419	1.10896	0.0367545	11.567	3.53194	up
KMW0045	C2H6S2	DiSulfur compounds, dimethyl	Sulfur compounds	624-92-0	189002	106831	177664	10401.4	10603.5	32497.9	1.05246	0.0249186	0.112995	-3.14567	down
XMW0887	C8H16O2	Butanoic acid, 2-methyl-, propyl ester	Ester	37064-20-3	16672.3	27874.3	12127.2	833992	883212	1.53456e+06	1.10986	0.0420645	57.3768	5.8424	up
WMW0107	C8H14	1,5-Heptadiene, 2-methyl-, (Z)-	Hydrocarbons	41044-64-8	263023	139656	99945.8	1.0942e+06	1.04241e+06	795977	1.06891	0.00416695	5.83454	2.54462	up
KMW0046	C6H12O	2-Hexanone	Ketone	591-78-6	199648	104783	75650.8	947976	898752	673915	1.0742	0.00601541	6.63183	2.72941	up
XMW0115	C4H9NO	5-Methyloxazolidine	Heterocyclic compound	58328-22-6	152737	77970.2	62918	685188	645001	488576	1.07607	0.00565639	6.19416	2.63091	up
KMW0067	C6H10O	3-Penten-2-one, 4-methyl-	Ketone	141-79-7	57322.4	32565.2	28622	196524	189838	136107	1.07072	0.00918729	4.40868	2.14035	up
KMW0133	C7H16O	1-Hexanol, 4-methyl-	Alcohol	818-49-5	9	9	9	7512.53	8209.22	13042.3	1.12155	0.0314068	1065.34	10.0571	up
XMW0888	C8H16O2	Butanoic acid, 3-methyl-, propyl ester	Ester	557-00-6	9	9	9	920013	999919	1.72862e+06	1.12221	0.0419485	135132	17.044	up
KMW0159	C7H16O	1-Heptanol	Alcohol	111-70-6	5742.86	7068.19	9557.85	91347.7	94902.6	343018	1.0739	0.179683	23.6609	4.56443	up
KMW0057	C5H10O	2-Penten-1-ol, (Z)-	Alcohol	1576-95-0	9	9	9	221596	204813	756748	1.11953	0.161533	43820.6	15.4193	up
KMW0068	C6H10O	3-Hexenal, (Z)-	Aldehyde	6789-80-6	98033.3	43147.9	52545.2	195006	187877	153123	1.01543	0.00709716	2.76682	1.46823	up
KMW0079	C8H18	Octane	Hydrocarbons	111-65-9	184313	98232.5	70889.2	861419	817068	616183	1.07464	0.0056437	6.49248	2.69877	up
KMW0066	C6H12O	Hexanal	Aldehyde	66-25-1	1.51136e+06	802114	558606	6.94791e+06	6.60073e+06	4.95999e+06	1.07138	0.00556092	6.44433	2.68803	up
XMW1432	C7H12	2,4-Dimethyl 1,4-pentadiene	Hydrocarbons	4161-65-3	52268.2	27476.3	20203.3	240259	227322	167956	1.07285	0.00707799	6.35869	2.66873	up
XMW0103	C5H6S	Thiophene, 3-methyl-	Heterocyclic compound	616-44-4	7170.22	4153.25	3641.65	13205.2	11840.2	11782.1	1.02888	0.0120364	2.46089	1.29918	up
WMW0187	C6H14O	2-Hexanol	Alcohol	626-93-7	312090	167461	126871	1.36901e+06	1.3121e+06	989751	1.07537	0.00515533	6.05332	2.59773	up
XMW0279	C7H14O	E-1-Methoxy-4-hexene	Hydrocarbons	134777-60-9	284797	147424	106196	1.29819e+06	1.22661e+06	931327	1.07179	0.00506387	6.41903	2.68236	up
KMW0070	C8H10	Benzene, 1,3-dimethyl-	Aromatics	108-38-3	21641.1	15466.3	17340.8	350815	289055	219139	1.11474	0.0193325	15.7766	3.97972	up
XMW0484	C7H10O	Furan, 2-propyl-	Heterocyclic compound	4229-91-8	52561.4	27876.8	19474.2	238982	224723	168575	1.0703	0.00609169	6.32833	2.66183	up
NMW0756	C4H10O2	1,3-Butanediol	Alcohol	107-88-0	312014	166391	123102	1.36709e+06	1.31075e+06	987643	1.07353	0.00506525	6.09384	2.60735	up
XMW0574	C8H14O2	4-Penten-1-ol, propanoate	Ester	30563-30-5	4048.34	1916.19	2462.01	449659	405728	749814	1.11719	0.0388693	190.493	7.5736	up
KMW0140	C5H7NS	Thiazole, 4,5-dimethyl-	Heterocyclic compound	3581-91-7	1.90705e+06	3.55154e+06	793040	17125	17277.8	174780	1.01787	0.12784	0.0334606	-4.90139	down
WMW0185	C8H8	1,3,5,7-Cyclooctatetraene	Ester	629-20-9	9	9	9	11898.4	12092.8	28311.4	1.11983	0.0851626	1937.13	10.9197	up
XMW1117	C8H14O2	2-Propenoic acid, pentyl ester	Ester	2998-23-4	6233.17	3906.02	5651.19	1.57284e+06	1.5034e+06	2.66912e+06	1.11995	0.0369246	363.852	8.50721	up
KMW0036	C6H12O	3-Hexanone	Ketone	589-38-8	10541.7	5687.61	4262.9	47401.2	46867.7	34274.7	1.07617	0.00614583	6.2728	2.64911	up
KMW0047	C5H8O	2-Butenal, 2-methyl-	Aldehyde	1115-11-3	8581.14	4713.87	5430.91	46115.5	41515.8	58819	1.10323	0.0112699	7.82073	2.9673	up
XMW0630	C9H18	1-Hexene, 3,5,5-trimethyl-	Hydrocarbons	4316-65-8	9	9	9	214838	196548	815864	1.11891	0.182068	45453.7	15.4721	up
XMW1114	C8H16	1-Octene	Hydrocarbons	111-66-0	263618	141373	99945.8	1.11186e+06	1.05464e+06	795803	1.06854	0.00511252	5.86668	2.55254	up
KMW0147	C7H9N	Pyridine, 2-ethyl-	Heterocyclic compound	100-71-0	9	9	9	40582.8	39524.3	77639.2	1.12151	0.052398	5842.46	12.5124	up
KMW0224	C8H10O	Benzene, (methoxymethyl)-	Ether	538-86-3	327168	158806	193238	6.93134e+07	6.44895e+07	118872369	1.11849	0.0402411	372.012	8.53921	up
KMW0060	C7H8	Toluene	Aromatics	108-88-3	5.79852e+06	4.15554e+06	4.42884e+06	672884	507516	840890	1.10262	0.0125546	0.140534	-2.83101	down
XMW0101	C7H14O2	1-Ethylpropyl acetate	Ester	620-11-1	921.697	830.872	703.897	4602.69	4452.24	3428.54	1.11022	0.0102766	5.08188	2.34536	up
XMW0671	C5H10N2	1,7-Diazabicyclo[2.2.0]heptane	Heterocyclic compound	279-42-5	19449.5	34282.5	7389.34	9	9	9	1.11495	0.120122	0.000441744	-11.1445	down
D131	C5H8O	3-Pentyn-1-ol	Alcohol	10229-10-4	43458.6	22711.6	16623.4	189032	178608	132774	1.06967	0.00637215	6.04411	2.59553	up
KMW0084	C5H5N	Pyridine	Heterocyclic compound	110-86-1	371839	225483	345928	18998.8	21025.9	58141.7	1.06423	0.0185245	0.104073	-3.26434	down
XMW0312	C8H10	Ethylbenzene	Aromatics	100-41-4	11241.7	5892.65	8986.53	230756	179018	179753	1.11422	0.00781828	22.5692	4.49628	up
WMW0188	C5H8O	2-Pentyn-1-ol	Alcohol	6261-22-9	254674	131390	99347.6	1.09038e+06	1.04104e+06	768020	1.07012	0.00639753	5.97317	2.5785	up
NMW0754	C5H8O2	Acetylacetone	Ketone	123-54-6	9428.86	5361.42	3853.17	41768.3	39474	28930.6	1.07362	0.00813861	5.90947	2.56303	up
XMW0878	C7H10	1,4-Cyclohexadiene, 1-methyl-	Hydrocarbons	4313-57-9	16594.7	8752.81	7569.33	59722.7	55960.7	41177.5	1.0675	0.00775184	4.76537	2.25259	up
KMW0405	C4H8O2	Propanoic Acid, 2-methyl-	Acid	79-31-2	2721.4	2680.91	3083.73	484049	440521	1.63334e+06	1.11053	0.161534	301.426	8.23566	up
XMW0436	C10H18O	2H-Pyran, 2-ethenyltetrahydro-2,6,6-trimethyl-	Heterocyclic compound	7392-19-0	2145.62	2351.21	2063.67	7155.01	7557.43	15045.5	1.06648	0.0945516	4.53592	2.1814	up
KMW0135	C6H8O	2-Cyclohexen-1-one	Ketone	930-68-7	9389.7	4979.62	6914.06	411942	357461	870564	1.11119	0.0801527	77.0539	6.2678	up
KMW0151	C6H12O3	Butanoic acid, 3-hydroxy-, ethyl ester	Ester	5405-41-4	880.957	1026.91	461.422	39194.2	38597.7	59363.6	1.11261	0.0222486	57.8888	5.85521	up
NMW0784	C7H12O2	Ethyl tiglate	Ester	5837-78-5	2.99433e+06	5.50909e+06	1.19369e+06	31193.6	25354.2	274627	1.01652	0.129452	0.0341519	-4.87189	down
KMW0148	C10H16	.alpha.-Pinene	Terpenoids	80-56-8	276795	171022	172920	1.33724e+07	1.15554e+07	2.97996e+07	1.11154	0.0897752	88.1651	6.46214	up
XMW0632	C10H16	Bicyclo[3.1.1]hept-2-ene, 3,6,6-trimethyl-	Terpenoids	4889-83-2	34883.6	21647.6	24661.2	291634	251523	522440	1.10136	0.0599552	13.1243	3.71417	up
WMW0023	C10H16	(+)-alpha-Pinene	Terpenoids	7785-70-8	299853	191519	175126	1.42796e+07	1.24029e+07	3.16468e+07	1.11142	0.0883184	87.5162	6.45148	up
XMW1229	C9H14	Bicyclo(3.3.1)non-2-ene	Hydrocarbons	6671-66-5	82428.9	40941.8	50475.1	18460496	1.72051e+07	3.21755e+07	1.11863	0.0423351	390.237	8.60821	up
D78	C4H6OS	Dihydro-3-(2H)-thiophenone	Heterocyclic compound	1003-04-9	1092.9	802.605	850.839	308280	287671	536108	1.12042	0.041922	412.206	8.68722	up
XMW0519	C10H14	Cyclobutanespiro-2'-bicyclo[1.1.0]butane-4'-spirocyclobutane	Hydrocarbons	76308-11-7	113733	70837	68998.6	5.03497e+06	4.34154e+06	1.15321e+07	1.11039	0.0951052	82.4573	6.36558	up
XMW1300	C9H18	Cyclopentane, butyl-	Hydrocarbons	2040-95-1	21343.7	23010.3	17375.7	587778	530906	1.11885e+06	1.11265	0.0606297	36.2473	5.1798	up
XMW1291	C8H16O2	1,3-Dioxolane, 4-methyl-2-(2-methylpropyl)-	Heterocyclic compound	18433-93-7	10096.6	17330.6	4030.67	9	9	9	1.11433	0.112389	0.00085829	-10.1862	down
NMW0787	C6H12O2	4-methyl-Pentanoic Acid	Acid	646-07-1	16672.3	23680.8	11056.5	818765	851418	1.52768e+06	1.11146	0.045231	62.2036	5.95893	up
WMW0201	C10H16	Bicyclo[2.2.1]heptane, 7,7-dimethyl-2-methylene-	Terpenoids	471-84-1	34232.5	19573.3	24669.8	291726	277562	521869	1.10333	0.0504752	13.9044	3.79747	up
XMW0890	C8H14O	1-Hepten-6-one, 2-methyl-	Ketone	10408-15-8	8534.36	4503.43	3358.86	1.8919e+06	1.71437e+06	3.40396e+06	1.11658	0.0490178	427.54	8.73992	up
KMW0113	C7H14O	2-Heptanone	Ketone	110-43-0	2636.71	4218.17	1894.13	9602.14	9192.68	8247.81	1.04053	0.00353675	3.09093	1.62804	up
XMW0901	C5H7ClO2	3-Chloro-2,4-pentanedione	Ketone	1694-29-7	1067.28	392.604	720.565	9286.31	8272.12	18112.6	1.08674	0.0696514	16.3595	4.03205	up
XMW0291	C5H9NO2	N-Acetylisoxazolidine	Heterocyclic compound	115615-36-6	2465.89	1883.12	1587.59	104885	88122.9	234768	1.11064	0.0936081	72.0575	6.17108	up
NMW0785	C5H8O2	Tiglic Acid	Acid	80-59-1	1.73291e+06	3.1682e+06	702765	15004.9	15363.2	110089	1.04145	0.125418	0.0250643	-5.31822	down
KMW0172	C10H16	Camphene	Terpenoids	79-92-5	34793	20222.6	24661.2	267981	278423	498296	1.10291	0.0499794	13.1117	3.71278	up
XMW0023	C10H16	4-methyl-1-(1-methylethyl)-Bicyclo[3.1.0]hex-2-ene	Hydrocarbons	28634-89-1	850460	415532	498941	1.6564e+08	153641846	2.7383e+08	1.11861	0.0355995	336.053	8.39255	up
KMW0112	C8H10	o-Xylene	Aromatics	95-47-6	11644.8	8262.3	10284.2	190284	156457	135672	1.11749	0.0107375	15.9785	3.99806	up
KMW0115	C8H8	Styrene	Aromatics	100-42-5	11798.4	7075.53	10643.3	745818	626738	1.14044e+06	1.11747	0.0334045	85.1364	6.4117	up
w29	C7H12O2	4-Pentenyl Acetate	Ester	1576-85-8	104486	128751	25135.6	6074.56	5428.22	6298.83	1.03497	0.124438	0.0688989	-3.85937	down
XMW0884	C7H10O	5-Hexenal, 4-methylene-	Hydrocarbons	17844-21-2	69894	85581.7	16032.8	3594.77	3798.1	3711.85	1.03458	0.126399	0.0647474	-3.94903	down
XMW0307	C8H10	p-Xylene	Aromatics	106-42-3	25734	15768.2	17495.1	344686	288369	223892	1.11185	0.0161906	14.5252	3.86048	up
XMW1299	C10H22	Heptane, 3,3,5-trimethyl-	Hydrocarbons	7154-80-5	14703.3	13605.7	8144.31	88926.8	86796.7	269924	1.06187	0.153477	12.2252	3.61178	up
XMW0885	C10H16	Santolina triene	Hydrocarbons	2153-66-4	9	9	9	531161	509159	955375	1.12215	0.0444939	73914.6	16.1736	up
WMW0109	C8H16O2	Propanoic acid, 2-methyl-, 2-methylpropyl ester	Ester	97-85-8	14259	13109.1	7518.02	88757.2	88931.3	269316	1.06363	0.149671	12.8133	3.67957	up
NMW0777	C4H8S2	DiSulfur compounds, methyl 2-propenyl	Sulfur compounds	2179-58-0	1254.9	1245.19	619.483	82880.4	71486.5	184918	1.10929	0.0898279	108.76	6.76501	up
XMW1200	C7H12O2	2-Methylbut-2-en-1-yl acetate	Alcohol	33425-30-8	12447.4	16631.5	13803	772315	675798	1.72607e+06	1.11166	0.0894847	74.0212	6.20987	up
XMW0065	C4H6N2	Fomepizole	Heterocyclic compound	7554-65-6	8798.32	5274.45	5349.79	294321	262456	724356	1.10736	0.10586	65.9611	6.04354	up
XMW0013	C10H16	1,7,7-trimethyl-Tricyclo[2.2.1.0(2,6)]heptane	Terpenoids	508-32-7	106952	72290	72351	4.39406e+06	4.21774e+06	8.43474e+06	1.11536	0.055517	67.7544	6.08224	up
XMW1058	C7H12O2	Cyclopentanol, acetate	Ester	933-05-1	9643.93	7138.31	5189.18	409412	359438	870796	1.11096	0.0802828	74.6263	6.22161	up
XMW1424	C2H3N3	1H-1,2,3-Triazole	Heterocyclic compound	288-36-8	20190.2	25362.4	21228.8	378591	393548	426754	1.12075	0.0012632	17.9525	4.16611	up
WMW0085	C4H10S2	Diethyl diSulfur compounds	Sulfur compounds	110-81-6	9	9	9	126549	133689	188883	1.12243	0.0168743	16634.1	14.0219	up
XMW0240	C10H22	3-Ethyl-3-methylheptane	Hydrocarbons	17302-01-1	16672.3	26406.5	11157.8	816056	885098	1.52911e+06	1.10963	0.0430013	59.5588	5.89624	up
XMW0600	C10H22	Octane, 3,3-dimethyl-	Hydrocarbons	4110-44-5	4865.7	10819.4	6929.58	18285.7	18282.3	19186.2	1.0062	0.0214712	2.4654	1.30182	up
NMW0781	C4H8O3	Butanoic Acid, 4-hydroxy-	Acid	591-81-1	4534.08	6900.03	7228.88	94613.9	95405.3	139558	1.11192	0.0196447	17.6594	4.14236	up
NMW0783	C10H16	(1S)-2,6,6-Trimethylbicyclo[3.1.1]hept-2-ene	Terpenoids	7785-26-4	299277	187086	175082	1.42821e+07	1.2409e+07	3.15959e+07	1.11143	0.0879551	88.1207	6.46141	up
WMW0099	C9H16	Cyclopentene, 1-butyl-	Hydrocarbons	2423-01-0	19757.4	16014.8	12605.1	772068	693479	1.73289e+06	1.11092	0.0880864	66.1144	6.04689	up
D447	C8H16O2	Pentanoic acid, 2-methyl-, ethyl ester	Ester	39255-32-8	9	9	9	79063.4	83811.7	145928	1.12191	0.0411165	11437.1	13.4814	up
XMW0651	C7H9N	Pyridine, 2,3-dimethyl-	Heterocyclic compound	583-61-9	10928.7	6749.31	9127.83	96856.6	80884.6	175353	1.09987	0.0648509	13.1723	3.71944	up
XMW0004	C10H16	Bicyclo[3.1.1]heptane, 6,6-dimethyl-2-methylene-, (1S)-	Terpenoids	18172-67-3	34905	20389.4	24671.3	290778	249274	522802	1.09995	0.0609803	13.2914	3.73242	up
XMW0889	C10H14	Bicyclo[3.1.0]hex-2-ene, 4-methylene-1-(1-methylethyl)-	Terpenoids	36262-09-6	10093.4	8403.47	4802.49	245736	252720	376176	1.11226	0.0214464	37.5389	5.23032	up
D350	C6H10O2	2-Pentenoic Acid, 2-methyl-	Acid	3142-72-1	43002.3	20785	22385.6	8.41608e+06	8.17858e+06	1.39754e+07	1.11843	0.0330272	354.753	8.47067	up
D181	C3H8O3	Glycerin	Alcohol	56-81-5	191.393	186.513	313.864	31915.7	32656.2	51277.7	1.1184	0.026161	167.468	7.38775	up
KMW0164	C8H16O2	Pentanoic acid, 4-methyl-, ethyl ester	Ester	25415-67-2	9	9	9	108672	118246	257816	1.12118	0.0786375	17953.1	14.1319	up
NMW0791	C9H12	Benzene, 1-ethyl-2-methyl-	Aromatics	611-14-3	17477.8	13130.7	10307.2	4.94309e+06	4.51104e+06	8.87793e+06	1.11937	0.0481946	448.045	8.8075	up
KMW0169	C5H12OS	3-Mercapto-3-methylbutanol	Alcohol	34300-94-2	43659	19454.5	25735.1	8.13335e+06	7.73648e+06	1.29939e+07	1.11832	0.0296755	324.864	8.34369	up
KMW0168	C8H14O	5-Methyl-(E)-2-hepten-4-one	Ketone	102322-83-8	44123.2	25710.5	30424.9	9.42836e+06	8.783e+06	1.64152e+07	1.1194	0.0422453	345.372	8.43201	up
KMW0178	C10H16	Bicyclo[3.1.0]hexane, 4-methylene-1-(1-methylethyl)-	Terpenoids	3387-41-5	849493	406168	500664	1.77088e+08	1.65669e+08	2.926e+08	1.11865	0.0349274	361.754	8.49887	up
WMW0226	C5H4O2	4H-Pyran-4-one	Heterocyclic compound	108-97-4	9	9	9	104957	98037.1	191325	1.12184	0.0483809	14604.4	13.8341	up
XMW0181	C9H16O	5-Hepten-2-one, 4,6-dimethyl-	Ketone	31162-48-8	5664.02	2673	2596.5	1.41608e+06	1.31104e+06	2.45547e+06	1.1178	0.042073	474.009	8.88877	up
D374	C10H18	(-)-trans-Pinane	Terpenoids	33626-25-4	6233.17	4098.65	5087.7	1.57284e+06	1.46851e+06	2.52708e+06	1.1206	0.0315519	361.129	8.49637	up
KMW0144	C7H14O2	Hexanoic acid, methyl ester	Ester	106-70-7	324.389	859.856	775.037	586148	542811	342555	1.11534	0.022663	751.048	9.55276	up
XMW0301	C9H12	Mesitylene	Aromatics	108-67-8	14905.6	11982.1	11169.5	4.92891e+06	4.58029e+06	8.88434e+06	1.1203	0.0473075	483.313	8.91681	up
XMW0910	C5H6N2O	1H-Imidazole, 1-acetyl-	Heterocyclic compound	2466-76-4	5684.61	4913.33	3734.69	64803.4	60825.6	125335	1.1053	0.0633267	17.51	4.1301	up
KMW0182	C9H14O	Furan, 2-pentyl-	Heterocyclic compound	3777-69-3	849189	700144	669447	148184	123661	222214	1.0877	0.0025803	0.222671	-2.16701	down
KMW0188	C4H8S2	2-Methyl-1,3-dithiacyclopentane	Heterocyclic compound	5616-51-3	14761.7	10659.8	11348.4	519059	482967	588135	1.12133	0.00348607	43.2463	5.4345	up
WMW0081	C9H12O	cis-2-(2-Pentenyl)furan	Heterocyclic compound	70424-13-4	1.50579e+06	1.07156e+06	1.14991e+06	363844	280284	490701	1.06594	0.0118334	0.304467	-1.71564	down
XMW0416	C10H16	1,3-Cyclohexadiene, 5-butyl-	Hydrocarbons	30168-57-1	6.8123e+06	4.56645e+06	5.08146e+06	24296.5	24480.2	43075.2	1.11766	0.0151412	0.00558024	-7.48546	down
KMW0235	C10H16	1,3,6-Octatriene, 3,7-dimethyl-, (Z)-	Terpenoids	3338-55-4	13447048	9.00792e+06	9.95971e+06	9	9	9	1.12233	0.0152402	8.32956e-07	-20.1953	down
XMW0149	C5H10N2	1H-Pyrazole, 4,5-dihydro-5,5-dimethyl-	Heterocyclic compound	4320-85-8	1.67128e+06	1.7474e+06	1.41831e+06	391399	428973	434840	1.11636	0.00610474	0.259503	-1.94618	down
KMW0183	C7H10N2	Pyrazine, 2-ethyl-5-methyl-	Heterocyclic compound	13360-64-0	6846.81	6071.21	7577.22	15127.8	16042.9	24717.5	1.06448	0.0583288	2.72689	1.44725	up
NMW0010	C10H12	Dicyclopentadiene	Hydrocarbons	77-73-6	585126	425662	443505	23964.4	16993.5	66350.9	1.07155	0.00788216	0.0737877	-3.76048	down
KMW0278	C6H6OS	Ethanone, 1-(2-thienyl)-	Heterocyclic compound	88-15-3	109056	216519	111430	26107.8	33487.9	35366.8	1.06853	0.0835937	0.217303	-2.20222	down
KMW0321	C8H14O2	Cyclohexanecarboxylic acid, methyl ester	Ester	4630-82-4	33681.2	13601.3	19630.9	371303	370804	1.11637e+06	1.08442	0.138024	27.7744	4.79568	up
XMW0585	C6H9NO3	5-Isoxazolecarboxylic acid, 4,5-dihydro-5-methyl-, methyl ester, (R)-	Heterocyclic compound	64018-42-4	12106.1	6273.81	13648.2	123740	124052	369918	1.07625	0.140157	19.2865	4.26952	up
KMW0176	C8H14O	5-Hepten-2-one, 6-methyl-	Ketone	110-93-0	1.13249e+07	1.1864e+07	9.55822e+06	2.59517e+06	2.82837e+06	3.23242e+06	1.11179	0.00487052	0.264328	-1.9196	down
XMW0100	C11H24	Octane, 5-ethyl-2-methyl-	Hydrocarbons	62016-18-6	2.59055e+06	2.68858e+06	2.18033e+06	578438	690190	742174	1.11014	0.00413737	0.269564	-1.8913	down
XMW0121	C12H24	1-Nonene, 4,6,8-trimethyl-	Hydrocarbons	54410-98-9	3172.57	919.449	4575.75	209183	163811	167560	1.09595	0.00643261	62.3637	5.96263	up
XMW0310	C6H12O2	2H-Pyran-2-methanol, tetrahydro-	Heterocyclic compound	100-72-1	34114.4	36156.8	43963.6	15482.4	16360.1	15030.9	1.10573	0.0161224	0.410325	-1.28516	down
KMW0241	C7H10N2	Pyrazine, 2-ethyl-3-methyl-	Heterocyclic compound	15707-23-0	869691	609924	640186	4.38647e+06	3.62462e+06	6.03953e+06	1.10369	0.0292806	6.62827	2.72863	up
KMW0244	C8H12N2	Pyrazine, 2-methyl-5-(1-methylethyl)-	Heterocyclic compound	13925-05-8	259573	160780	186030	4.19467e+06	3.60015e+06	5.21448e+06	1.11666	0.0124942	21.4539	4.42317	up
XMW1218	C10H20O2	2-Nonanone, 3-(hydroxymethyl)-	Ketone	67801-33-6	58812.7	52317	49344.2	112391	109535	117852	1.11202	9.82948e-05	2.11734	1.08226	up
XMW0522	C8H11N	Pyridine, 3-propyl-	Heterocyclic compound	4673-31-8	5.68851e+06	3788193	4.20594e+06	159101	136198	601247	1.06339	0.0132872	0.0655243	-3.93183	down
KMW0223	C10H16	1,3-Cyclohexadiene, 1-methyl-4-(1-methylethyl)-	Terpenoids	99-86-5	892226	570674	656065	4.44387e+06	3.68296e+06	6.09588e+06	1.10162	0.0279387	6.7121	2.74677	up
NMW0012	C9H12	Benzene, 1,2,3-trimethyl-	Aromatics	526-73-8	197831	171209	152470	782981	657301	1.07253e+06	1.10121	0.0314049	4.81834	2.26854	up
XMW0598	C9H10	.alpha.-Methylstyrene	Aromatics	98-83-9	1449.72	1330.95	971.53	21321.9	15212.3	18343.2	1.116	0.0101645	14.6253	3.8704	up
KMW0184	C6H9NS	Thiazole, 2,4,5-trimethyl-	Heterocyclic compound	13623-11-5	7347.84	6247.34	7457.45	9	9	9	1.1224	0.00302584	0.0012825	-9.60683	down
XMW1209	C9H18O2	Propanoic acid, 2-methyl-, 2-methylbutyl ester	Ester	2445-69-4	59306	58552.7	35379.6	850189	892356	1.70595e+06	1.10553	0.0585714	22.5041	4.49212	up
XMW0774	C9H18O2	3-Hexene, 1-(1-methoxyethoxy)-, (Z)-	Hydrocarbons	54340-96-4	434.141	133.591	419.281	7054.99	6603.46	12775.1	1.08851	0.050382	26.7813	4.74315	up
XMW0658	C7H12O2	2-Heptenoic Acid	Acid	18999-28-5	10817.2	5011.12	4322.33	9	9	9	1.11764	0.0827542	0.00133991	-9.54365	down
XMW1332	C8H14O2	2,2'-Bifuran, octahydro-	Heterocyclic compound	1592-33-2	87844.8	66422.4	62100.7	559461	601559	921584	1.10878	0.0316363	9.6253	3.26683	up
KMW0160	C4H10OS	1-Propanol, 3-(methylthio)-	Alcohol	505-10-2	6683.79	2609.55	7238.58	53662.4	59700.7	91581	1.0823	0.0316864	12.3969	3.6319	up
WMW0040	C10H16	trans-.beta.-Ocimene	Terpenoids	3779-61-1	1.9073e+07	1.28093e+07	1.42673e+07	41251.3	40860.6	81170.5	1.11724	0.014896	0.0035381	-8.14281	down
KMW0250	C10H20O	7-Octen-2-ol, 2,6-dimethyl-	Terpenoids	18479-58-8	3602.78	4211.32	3637.28	22330.7	23162.2	38437.2	1.10436	0.043719	7.32926	2.87367	up
XMW0659	C10H14	Benzene, n-butyl-	Aromatics	104-51-8	395536	269693	287139	6.00429e+06	5.19817e+06	7.4201e+06	1.11775	0.0117094	19.5539	4.28939	up
NMW0793	C5H10O3	Butanoic Acid, 3-hydroxy-3-methyl-	Acid	625-08-1	8455.15	4225.19	6602.2	1.80147e+06	1.67255e+06	3.18612e+06	1.11834	0.0447104	345.397	8.43211	up
XMW1204	C5H10O2S	Ethyl (methylthio)acetate	Ester	4455-13-4	23622.7	16941.9	19059.8	9	9	9	1.12206	0.00970227	0.000452835	-11.1087	down
WMW0127	C8H16O	3-Octen-1-ol, (Z)-	Alcohol	20125-84-2	14080.7	14181.6	12240.7	184965	148226	194566	1.12011	0.00738244	13.0301	3.70378	up
WMW0087	C9H18O2	Butanoic Acid, 3-methylbutyl ester	Ester	106-27-4	87452.6	69225	56061.5	556100	583237	946641	1.105	0.0377209	9.80534	3.29357	up
WMW0227	C6H4Cl2	Benzene, 1,4-dichloro-	Aromatics	106-46-7	8925	3133.84	9281	758345	584946	593494	1.10993	0.00766172	90.7591	6.50397	up
KMW0199	C10H16	.beta.-Myrcene	Terpenoids	123-35-3	1.14552e+07	7.88097e+06	8.68569e+06	232883	318180	1.14049e+06	1.06475	0.0107183	0.0603656	-4.05013	down
KMW0252	C10H16	1,3,7-Octatriene, 3,7-dimethyl-	Terpenoids	502-99-8	1.8938e+07	1.27906e+07	1.41579e+07	38481.1	37646.2	76105.6	1.11725	0.014613	0.0033176	-8.23565	down
XMW1308	C10H17F3O2	1-Octyl trifluoroacetate	Ester	2561-21-9	8899.13	9355.22	6589.28	55376	51996.9	74020.3	1.11024	0.0156272	7.3014	2.86817	up
XMW0091	C10H16O	3-Isopropylidene-5-methyl-hex-4-en-2-one	Ketone	64149-32-2	1.86938e+07	1.82731e+07	1.91051e+07	456173	468281	309889	1.12034	9.40904e-05	0.0220135	-5.50547	down
XMW0127	C10H14	o-Cymene	Terpenoids	527-84-4	190736	141604	146904	5.59256e+06	5.31011e+06	6.07987e+06	1.12154	0.00159437	35.4361	5.14715	up
KMW0243	C8H14O	(E)-2-Octenal	Aldehyde	2548-87-0	26275.4	21697.2	17908.4	418273	360104	510712	1.11805	0.0111845	19.567	4.29035	up
D206	C6H8O2	1,2-Cyclohexanedione	Ketone	765-87-7	56431.6	36685.6	51624.1	158738	172583	245636	1.08587	0.0285065	3.98613	1.99499	up
NMW0029	C8H8O2	Formic acid, phenylmethyl ester	Ester	104-57-4	38520.2	52424.3	28001.3	9	9	9	1.12172	0.030393	0.000226994	-12.1051	down
XMW0412	C8H10O2	3-Acetyl-2,5-dimethyl furan	Heterocyclic compound	10599-70-9	683063	673542	690806	58774.1	56916.2	57044	1.12257	5.09499e-05	0.0843672	-3.56717	down
XMW1290	C6H10N2O	3-n-Propyl-2-pyrazolin-5-one	Heterocyclic compound	29211-70-9	4173.52	3506.33	2601.81	26952.2	28913.2	39645	1.10928	0.0176782	9.28941	3.21559	up
w43	C6H10O2	2-Oxepanone	Ester	502-44-3	4830.42	3946.37	3401.98	17468.2	21003.1	44280.3	1.06895	0.107225	6.79475	2.76442	up
KMW0255	C7H10N2O	3-Methoxy-2,5-dimethylpyrazine	Heterocyclic compound	19846-22-1	4041.02	3355.23	3569.54	38428.2	33444.7	46705.4	1.11884	0.0112565	10.8135	3.43476	up
NMW0025	C8H8O2	Acetic acid, phenyl ester	Ester	122-79-2	23608.5	20995.9	18175.7	127448	133464	256639	1.09545	0.0690101	8.24386	3.04332	up
NMW0026	C4H8S2	1,4-Dithiane	Amine	505-29-3	10944.9	13656	12438.3	25111.1	25532.9	31825.2	1.0887	0.0121755	2.22653	1.1548	up
XMW0729	C11H18	Cyclohexane, 2-ethenyl-1,1-dimethyl-3-methylene-	Hydrocarbons	95452-08-7	34437.3	30187.5	29165.8	242145	213583	460810	1.09843	0.0723154	9.77216	3.28868	up
XMW0039	C8H14O	Cycloheptanone, 3-methyl-	Ketone	933-17-5	33930.7	27979.8	29165.8	242145	251183	460810	1.10485	0.0563878	10.4762	3.38905	up
XMW1305	C9H18O2	Ethyl 5-methylhexanoate	Ester	10236-10-9	492	239.675	281.672	23892.4	26364.3	70592.3	1.10777	0.119035	119.257	6.89793	up
XMW0037	C10H14	Benzene, 1-ethyl-3,5-dimethyl-	Aromatics	934-74-7	150345	110760	114308	1.2369e+06	1.11795e+06	1.4155e+06	1.11806	0.00502249	10.0432	3.32815	up
XMW0578	C8H16O	Furan, 2-butyltetrahydro-	Heterocyclic compound	1004-29-1	87981.3	48666.9	28547.7	860873	858306	2.67552e+06	1.07538	0.145117	26.6029	4.73351	up
XMW0226	C9H18O	2-Heptanone, 4,6-dimethyl-	Ketone	19549-80-5	110270	76389.7	83166.3	1702.18	1261.26	2293.08	1.11545	0.0134399	0.0194811	-5.68178	down
KMW0150	C9H12	Benzene, 1,2,4-trimethyl-	Aromatics	95-63-6	1.01541e+06	690713	746958	143755	103485	205352	1.08124	0.0156674	0.184499	-2.43831	down
XMW0678	C10H16	1,3-Cyclohexadiene, 1,5,5,6-tetramethyl-	Terpenoids	514-94-3	50563	26791	30923.3	1.24029e+07	1.14449e+07	2.30769e+07	1.11853	0.052604	433.375	8.75947	up
KMW0170	C8H14O	1-Octen-3-one	Ketone	4312-99-6	9	9	9	184316	192408	343647	1.12201	0.0435464	26680.4	14.7035	up
XMW0051	C6H5NO	4-Pyridinecarboxaldehyde	Heterocyclic compound	872-85-5	21275.3	11221.2	12510.7	5.2007e+06	4.91145e+06	9.6862e+06	1.11854	0.0509294	439.893	8.78101	up
XMW1192	C6H9ClO2	2-Propenoic acid, 2-methyl-, 2-chloroethyl ester	Ester	1888-94-4	59130.4	37704.9	35925.6	1.32836e+06	1.21426e+06	2.39588e+06	1.11217	0.050945	37.1984	5.21717	up
w09	C10H18	2,6-Octadiene, 2,6-dimethyl-	Hydrocarbons	2792-39-4	60887.1	37743.4	35925.6	1.7982e+06	1.39144e+06	2.40395e+06	1.11567	0.0250784	41.5707	5.3775	up
NMW0792	C6H4N2	4-Pyridinecarbonitrile	Heterocyclic compound	100-48-1	3191.5	1539.08	1657.09	697641	650343	1.25138e+06	1.11791	0.0463914	406.934	8.66865	up
KMW0193	C10H16	.beta.-Pinene	Terpenoids	127-91-3	315171	171571	169636	8.48658e+06	1.03965e+07	1.87386e+07	1.11082	0.0594618	57.3172	5.8409	up
KMW0173	C8H16O	1-Octen-3-ol	Alcohol	3391-86-4	10813.3	11026.7	12910.2	1.30878e+06	1.43337e+06	1.24796e+06	1.12197	0.00170619	114.822	6.84326	up
XMW0299	C8H16O2	Butanoic acid, butyl ester	Ester	109-21-7	212414	236915	210108	25541.7	43999.6	31466	1.10776	0.000165951	0.153172	-2.70678	down
XMW0306	C8H16O2	Heptanoic acid, methyl ester	Ester	106-73-0	9	9	9	12981	12579.1	19880.8	1.12202	0.0236408	1683	10.7168	up
WMW0086	C5H12S2	DiSulfur compounds, ethyl 1-methylethyl	Sulfur compounds	53966-36-2	2.11278e+06	1.40337e+06	1.56037e+06	46321	38306.2	202298	1.0594	0.0135668	0.0565201	-4.14509	down
XMW0202	C10H18	cis-2,6-Dimethyl-2,6-octadiene	Hydrocarbons	2492-22-0	4.66956e+06	4.85062e+06	3.94571e+06	996873	1.10667e+06	1.21738e+06	1.11406	0.00475507	0.246617	-2.01965	down
XMW1454	C6H6O3	Isomaltol	Heterocyclic compound	3420-59-5	3.75953e+06	4.00262e+06	3.24392e+06	890841	929546	1.10469e+06	1.11188	0.00405531	0.265769	-1.91175	down
w06	C12H26	Heptane, 2,2,4,6,6-pentamethyl-	Hydrocarbons	13475-82-6	64520.8	53996.3	55316.9	13935.1	10169.2	13796.1	1.10795	0.00222453	0.218026	-2.19743	down
XMW0902	C10H18	2,6-Dimethyl-2-trans-6-octadiene	Terpenoids	2609-23-6	1.83869e+07	1.26236e+07	1.39969e+07	533002	477341	1.96779e+06	1.06661	0.0105268	0.0661699	-3.91768	down
KMW0181	C10H16O	2,3-Dehydro-1,8-cineole	Terpenoids	92760-25-3	282195	315757	205316	48605.1	58178.1	53920.3	1.10629	0.0218626	0.200062	-2.32148	down
WMW0058	C8H16O	5-Hepten-2-ol, 6-methyl-	Alcohol	1569-60-4	808869	793782	931907	259751	278527	211619	1.10991	0.00159066	0.295869	-1.75697	down
NMW0794	C10H14	Benzene, (1-methylpropyl)-	Aromatics	135-98-8	9	9	9	65223.5	61184.8	61529.5	1.12267	0.000425604	6960.66	12.765	up
D324	C6H8N2O	Pyrazine, 2-methoxy-6-methyl-	Heterocyclic compound	2882-21-5	45207.7	57754.1	30538.3	9559.19	9557.88	8194.21	1.09045	0.0455646	0.204579	-2.28927	down
D455	C7H14O3	Pentanoic acid, 2-hydroxy-4-methyl-, methyl ester	Ester	40348-72-9	1.85242e+07	1.26712e+07	1.39969e+07	425209	411177	1.89578e+06	1.06137	0.0108116	0.0604564	-4.04796	down
XMW0177	C8H12O	Ethanone, 1-(2-methyl-1-cyclopenten-1-yl)-	Ketone	3168-90-9	251690	305377	203623	60423.2	57143.1	59706.1	1.10809	0.0219793	0.233042	-2.10134	down
XMW1133	C10H16O	5-Isopropyl-3,3-dimethyl-2-methylene-2,3-dihydrofuran	Heterocyclic compound	81250-44-4	498088	496310	361422	7407.23	5424.3	26048.5	1.08485	0.00932492	0.0286764	-5.12399	down
KMW0192	C8H10O	Benzene, 1-methoxy-2-methyl-	Ether	578-58-5	165612	159103	132729	1.20653e+06	1.1937e+06	1.45824e+06	1.11896	0.00522306	8.43483	3.07636	up
WMW0103	C7H14O	2-Cyclopentylethanol	Alcohol	766-00-7	857488	1.10152e+06	624840	35978.4	40379.3	52181.3	1.1129	0.0270041	0.049747	-4.32925	down
D269	C9H18O2	Butanoic acid, 2-methyl-, 2-methylpropyl ester	Ester	2445-67-2	17852	14000.3	17180.4	198200	200708	333293	1.11304	0.0362304	14.9329	3.90042	up
D417	C8H14O2	3-Hexen-1-ol, acetate, (E)-	Ester	3681-82-1	316360	384613	232976	42983.2	40786.3	52658.2	1.10583	0.0254674	0.146076	-2.77521	down
XMW0712	C9H8	Benzene, 1-propynyl-	Aromatics	673-32-5	202618	137744	156299	9	9	9	1.12214	0.0133084	5.43629e-05	-14.167	down
XMW0409	C7H8O2	1-Propanone, 1-(2-furanyl)-	Heterocyclic compound	3194-15-8	108814	122995	97710.9	47467.4	41337.9	51172.7	1.09727	0.00663548	0.424794	-1.23517	down
XMW0042	C2H3N3O	3H-1,2,4-Triazol-3-one, 1,2-dihydro-	Heterocyclic compound	930-33-6	4151.35	1775.79	4423.45	33888.2	27103.2	71796.6	1.06965	0.0985931	12.829	3.68134	up
KMW0205	C7H12O	Cyclohexene, 1-methoxy-	Aromatics	931-57-7	2279.68	1319.38	1537.42	17888.6	15264.7	16341.1	1.1122	0.00087844	9.63585	3.26841	up
XMW0898	C8H12N2	4-Isobutylpyrimidine	Heterocyclic compound	98489-37-3	93567.1	82417.5	81730.6	322272	267168	441758	1.09765	0.0370555	4.00131	2.00047	up
WMW0210	C8H14O2	2-Hexen-1-ol, acetate, (E)-	Ester	2497-18-9	1039.17	859.008	1312.62	7813.76	8709.83	18447.6	1.0892	0.0895226	10.8918	3.44517	up
NMW0013	C7H9N	Benzylamine	Amine	100-46-9	52676.6	47341.5	42990.9	189445	158793	257541	1.09973	0.0329599	4.23595	2.08268	up
XMW1070	C4H6O4	Acetic Acid, (acetyloxy)-	Acid	13831-30-6	7104.67	3569.3	8740.12	70858.4	59623.4	126865	1.08532	0.0616449	13.2557	3.72854	up
KMW0234	C10H14	p-Cymene	Aromatics	99-87-6	179239	138145	143246	5.66013e+06	5.31011e+06	6.11914e+06	1.12186	0.00173288	37.0999	5.21334	up
XMW1221	C6H12O2S	Acetic acid, (propylthio)-, methyl ester	Ester	20600-65-1	17973.8	15207	17658.4	9	9	9	1.12245	0.0026549	0.000531085	-10.8788	down
WMW0215	C10H16	.beta.-Ocimene	Terpenoids	13877-91-3	1.26824e+07	8.32508e+06	9.46827e+06	9	9	9	1.12231	0.0160892	8.85951e-07	-20.1063	down
KMW0229	C9H18O2	Hexanoic acid, 1-methylethyl ester	Ester	2311-46-8	121248	79975.1	85069.8	48074.9	37052	43371.9	1.04519	0.0489051	0.448836	-1.15574	down
XMW0011	C10H14	Benzene, 1,4-diethyl-	Aromatics	105-05-5	499515	334060	369525	9	9	9	1.12216	0.0153669	2.2442e-05	-15.4434	down
XMW0076	C5H4N2	1H-Pyrrole-3-carbonitrile	Heterocyclic compound	7126-38-7	5.06597e+06	3.40268e+06	3.77504e+06	9	9	9	1.1223	0.0149082	2.20522e-06	-18.7906	down
XMW0523	C5H4N2	1H-Pyrrole-2-carbonitrile	Heterocyclic compound	9513-94-4	7762.29	8993.36	18230.8	180323	192591	333621	1.09737	0.0444731	20.1945	4.33589	up
KMW0240	C6H7NO	Ethanone, 1-(1H-pyrrol-2-yl)-	Heterocyclic compound	1072-83-9	87501.3	59959.2	59317.4	1.18658e+06	1.02906e+06	1.48244e+06	1.1167	0.0124723	17.8843	4.16062	up
D387	C9H20O	1-Hexanol, 3,5,5-trimethyl-	Alcohol	3452-97-9	53598	37363.5	40226.7	9	9	9	1.12203	0.012843	0.000205811	-12.2464	down
KMW0212	C8H8O	BenzeneacetAldehyde	Aldehyde	122-78-1	8.78218e+06	5.91804e+06	6.59966e+06	9	9	9	1.12233	0.0144817	1.26761e-06	-19.5895	down
XMW0281	C11H24	Decane, 5-methyl-	Hydrocarbons	13151-35-4	9	9	9	221192	200768	380389	1.12208	0.042235	29716.6	14.859	up
XMW1440	C8H10O3	2-methylprop-2-enoyl 2-methylprop-2-enoate	Others	760-93-0	6963.9	11208.8	6080.2	20045.5	19778.1	21128.2	1.04431	0.012094	2.51317	1.32951	up
NMW0021	C6H8N2	2-PyridinemethanAmine	Heterocyclic compound	3731-51-9	43822.6	31819	32879.1	866722	748866	1.07492e+06	1.11915	0.0119424	24.7926	4.63184	up
XMW0490	C10H12	1-Methyl-2-phenylcyclopropane	Aromatics	3145-76-4	29587.4	20579.9	21966.3	320795	277338	376970	1.11738	0.00857389	13.518	3.75681	up
XMW1203	C5H6O3	2,5-Furandione, dihydro-3-methyl-	Heterocyclic compound	4100-80-5	2315.85	3040.37	2580.36	34269.4	27965.5	45043	1.11453	0.0217648	13.5169	3.75669	up
NMW0022	C8H10O	Benzenemethanol, .alpha.-methyl-	Alcohol	98-85-1	131755	128201	129229	2.21977e+06	1.92044e+06	2.75685e+06	1.12025	0.0124831	17.7218	4.14746	up
XMW0672	C3H3N3O2	1,2,4-Triazine-3,5(2H,4H)-dione	Heterocyclic compound	461-89-2	4830.42	3946.37	6880.14	18380.5	18405.8	39410.6	1.04742	0.100175	4.86666	2.28293	up
XMW0767	C9H16O2	2-Furanmethanol, 5-ethenyltetrahydro-.alpha.,5-dimethyl-	Heterocyclic compound	104188-13-8	59819.1	61181.1	65944	342275	360678	600227	1.10374	0.0463564	6.97096	2.80136	up
KMW0276	C8H18O	1-Octanol	Alcohol	111-87-5	8380.4	8316.11	13753.5	101529	106385	268475	1.08544	0.113319	15.645	3.96763	up
XMW0186	C8H12O	3,5-Octadien-2-one, (E,E)-	Ketone	30086-02-3	62954.5	87656.7	73506.2	222018	214141	211575	1.1031	0.000620941	2.89015	1.53115	up
KMW0259	C10H16	.gamma.-Terpinene	Terpenoids	99-85-4	798263	545521	585401	1.26354e+07	1.09286e+07	1.57172e+07	1.11788	0.0122285	20.3615	4.34777	up
XMW1123	C10H14	Benzene, 2-ethyl-1,4-dimethyl-	Aromatics	1758-88-9	60128.8	64566.1	37427.7	10438.6	6500.48	12162.2	1.07471	0.0300705	0.179502	-2.47793	down
KMW0260	C7H10O2	2-Cyclopenten-1-one, 2-hydroxy-3,4-dimethyl-	Ketone	21835-00-7	4116.36	2023.53	2958.33	16710.2	19181.9	29943.9	1.08599	0.0405651	7.23614	2.85522	up
KMW0263	C7H11NS	Thiazole, 5-ethyl-2,4-dimethyl-	Heterocyclic compound	38205-61-7	4444.54	2296.76	3520.1	16800.2	19181.9	30156	1.08348	0.0427264	6.44533	2.68825	up
D306	C10H18O	1,5-Heptadien-4-ol, 3,3,6-trimethyl-	Terpenoids	27644-04-8	1148.63	1483.23	1510.68	9	9	9	1.12231	0.00712002	0.00651773	-7.26142	down
XMW0528	C8H12S	Thiophene, 2-butyl-	Heterocyclic compound	1455-20-5	11238.1	7919.34	8246.88	81886.6	77708.9	127822	1.10946	0.0321635	10.488	3.39067	up
XMW0168	C8H12S	3-Butylthiophene	Heterocyclic compound	34722-01-5	9	9	9	3906.84	4231.09	7987.51	1.12019	0.0547118	597.239	9.22216	up
KMW0291	C10H18O	Linalool	Terpenoids	78-70-6	9.33873e+07	9.10727e+07	9.5382e+07	1.44224e+06	1.2176e+06	2.97013e+06	1.11129	1.65351e-05	0.0201184	-5.63534	down
KMW0294	C8H16O	2-Octen-1-ol, (E)-	Alcohol	18409-17-1	4759.61	6590.04	6077.32	85926.7	94972.2	201011	1.10341	0.0813191	21.9149	4.45384	up
KMW0315	C7H11NO	2-Acetyl-3,4,5,6-tetrahydropyridine	Heterocyclic compound	27300-27-2	8561.31	6703.68	6853.83	40508.2	45142	74836.1	1.10044	0.0498965	7.25565	2.8591	up
KMW0297	C10H18O2	trans-Linalool oxide (furanoid)	Heterocyclic compound	34995-77-2	219564	423839	223186	73094.3	71613.3	80985.7	1.06513	0.0867212	0.260439	-1.94099	down
KMW0426	C7H5N	Benzonitrile	Nitrogen compounds	100-47-0	255565	171844	197275	15416.4	12049.2	36128.5	1.07398	0.0115752	0.101802	-3.29616	down
XMW3734	C7H6O2	2-hydroxy-BenzAldehyde	Aldehyde	90-02-8	379799	258902	289489	2164.39	3423.38	2142.66	1.11911	0.0136946	0.0083285	-6.90773	down
KMW0258	C7H8O2	2-methoxy-Phenol	Phenol	90-05-1	30372.4	46006.1	28702.1	4407.96	4094.74	11228.1	1.03934	0.0224619	0.187769	-2.41297	down
XMW0670	C4H5N3	Acetonitrile, 2,2'-iminobis-	Nitrogen compounds	628-87-5	30779	22252.2	26651.4	584485	592027	635660	1.12115	0.000591312	22.7424	4.50731	up
D389	C12H20O2	(S)-3,3,6-Trimethylhepta-1,5-dien-4-yl acetate	Ester	3465-88-1	9	9	9	2.82001e+06	2.82862e+06	3.73438e+06	1.12263	0.00927712	347519	18.4067	up
KMW0319	C10H16O	7-Oxabicyclo[4.1.0]heptane, 1-methyl-4-(1-methylethenyl)-	Terpenoids	1195-92-2	192328	139486	170097	1.88313e+07	1.8896e+07	1.97827e+07	1.12217	0.000252518	114.582	6.84024	up
XMW0717	C9H10O	Ethanone, 1-(2-methylphenyl)-	Ketone	577-16-2	18671.4	12693	17087.2	122959	123640	122927	1.11636	0.000225179	7.62672	2.93106	up
XMW1069	C10H18O2	Butanoic acid, 3-hexenyl ester, (E)-	Ester	53398-84-8	45310	32335.5	27674	1.36801e+06	1.41481e+06	1.39975e+06	1.11984	1.34944e-05	39.7132	5.31155	up
XMW0689	C8H10N2O	Ethanone, 1-(3,5-dimethylpyrazinyl)-	Heterocyclic compound	54300-08-2	23671.1	31317.3	19740.1	530205	559387	712317	1.11689	0.00928961	24.1127	4.59172	up
KMW0608	C6H14OS	3-Mercaptohexanol	Alcohol	51755-83-0	975067	709266	850034	64957624	65315742	67564909	1.12208	0.00013892	78.0622	6.28655	up
XMW1057	C4H7NO	Methacrylamide	Amine	79-39-0	9	9	9	31247.2	30330	37195.5	1.12263	0.00424732	3658.25	11.8369	up
KMW0277	C9H14S	Thiophene, 2-pentyl-	Heterocyclic compound	4861-58-9	23524.5	22238.6	24682.1	391260	397104	393421	1.12245	1.20244e-06	16.776	4.06832	up
w48	C10H18O	2H-Pyran, tetrahydro-4-methyl-2-(2-methyl-1-propenyl)-	Terpenoids	16409-43-1	4.03738e+06	3.95401e+06	4.10999e+06	359105	373203	445529	1.1205	2.82499e-06	0.0973309	-3.36096	down
WMW0048	C9H16O	6-Nonenal, (E)-	Aldehyde	2277-20-5	1.11557e+06	815555	976148	7.83915e+07	7.86268e+07	8.21578e+07	1.12212	0.00022385	82.2682	6.36226	up
XMW0676	C9H10O	Ethanone, 1-(3-methylphenyl)-	Ketone	585-74-0	18945.7	15525	15239.9	146498	152653	158620	1.12087	0.000197435	9.20872	3.203	up
XMW0681	C10H16O	6-Octenal, 7-methyl-3-methylene-	Aldehyde	55050-40-3	37028.7	60322.5	58875.4	316345	314380	316035	1.1044	0.000761947	6.06017	2.59936	up
XMW0274	C5H7NO3	3-Acetyl-2-oxo-1,3-oxazolidine	Heterocyclic compound	1432-43-5	1569.47	2795.62	1565.02	15376.4	18245.6	22606.7	1.10087	0.0128654	9.4819	3.24518	up
XMW0442	C8H12N2	Betahistine	Heterocyclic compound	5638-76-6	197711	143338	123544	5168891	5401761	5317322	1.11985	4.35297e-05	34.1976	5.09582	up
XMW0452	C10H16	2,4,6-Octatriene, 3,4-dimethyl-	Hydrocarbons	57396-75-5	13606.5	11900.4	14571.2	1.78592e+06	1.80578e+06	1.7844e+06	1.12243	1.18072e-05	134.141	7.0676	up
XMW0411	C8H16O	Cyclohexanol, 2,6-dimethyl-	Alcohol	5337-72-4	92408685	89894045	94252296	3.53296e+06	3.4589e+06	5.17339e+06	1.11822	1.8866e-05	0.0439885	-4.50673	down
XMW1392	C11H16	2-Methyl-7-exo-vinylbicyclo[4.2.0]oct-1(2)-ene	Hydrocarbons	107914-89-6	9	9	9	988951	996231	1017895	1.12267	7.53982e-05	111225	16.7631	up
XMW0907	C9H12O3	2-(2-Acetoxy-1-propyl)furan, (S)	Heterocyclic compound	60830-70-8	38499.9	35415	42802.9	711107	696498	767594	1.12186	0.000902365	18.6364	4.22005	up
XMW0914	C5H6N2O	Ethanone, 1-(1H-pyrazol-4-yl)-	Heterocyclic compound	25016-16-4	94614.2	71904.9	85893.6	1.46535e+06	1.45611e+06	1.46236e+06	1.12141	1.37727e-06	17.3677	4.11833	up
KMW0342	C10H18O	Citronellal	Terpenoids	106-23-0	13786.2	16323.5	18796.7	357554	376096	372523	1.12032	0.000114733	22.6182	4.49941	up
KMW0373	C9H10O2	Benzoic acid, ethyl ester	Ester	93-89-0	27956.7	17103.6	23475.4	979905	1.00818e+06	1.00704e+06	1.12012	1.69023e-05	43.7017	5.44962	up
KMW0058	C10H18O2	2H-Pyran-3-ol, 6-ethenyltetrahydro-2,2,6-trimethyl-	Heterocyclic compound	14049-11-7	179445	298736	138874	6.26988e+06	6.31465e+06	6.02929e+06	1.11263	8.10309e-06	30.1656	4.91483	up
XMW0084	C10H16	2,4,6-Octatriene, 2,6-dimethyl-	Terpenoids	673-84-7	153017	99712.2	112776	9	9	9	1.122	0.0168981	7.38705e-05	-13.7246	down
w32	C9H18O2	Acetic acid, heptyl ester	Ester	112-06-1	9	9	9	67712.7	70963.2	79783.2	1.12265	0.00244375	8091.08	12.9821	up
WMW0100	C9H18O	3-Nonen-1-ol, (E)-	Alcohol	10339-61-4	72151	79783	125763	2.0704e+06	2.02548e+06	2.19606e+06	1.11564	0.000208599	22.6576	4.50192	up
XMW1385	C6H7N3	3-Imidazol-1-ylpropanenitrile	Heterocyclic compound	23996-53-4	45851.7	62694.3	20886.4	3.17887e+07	3.18259e+07	2.91896e+07	1.11721	0.000795358	717.01	9.48585	up
WMW0061	C9H10O	BenzAldehyde, 2-ethyl-	Aldehyde	22927-13-5	1739.71	933.098	2005.59	5097.15	5794.28	6085.38	1.05812	0.000743015	3.62877	1.85948	up
XMW1409	C9H13N	(R)-(+)-1-(p-Tolyl)ethylAmine	Amine	4187-38-6	2264.8	1643.77	1477.41	19599.9	19079.9	18956.8	1.11713	9.2131e-07	10.7012	3.4197	up
NMW0041	C11H18	(E)-4,8-Dimethylnona-1,3,7-triene	Terpenoids	19945-61-0	176270	129561	102106	7.73422e+06	8.00114e+06	8.16211e+06	1.1199	0.000172629	58.5812	5.87237	up
KMW0324	C10H16O	Limonene oxide, cis-	Terpenoids	13837-75-7	191762	137257	168859	1.87576e+07	1.88237e+07	1.97113e+07	1.12211	0.000254901	115.073	6.84641	up
XMW1389	C9H12O	2,3-Dimethylanisole	Ether	2944-49-2	48726	35277.8	36714.7	390990	378854	497340	1.11687	0.00888781	10.497	3.39191	up
KMW0348	C9H14N2	Pyrazine, 3,5-diethyl-2-methyl-	Heterocyclic compound	18138-05-1	9	9	9	33619.2	34039.2	38622	1.12266	0.00204011	3936.31	11.9426	up
D76	C10H22O2	Octanal dimethyl acetal	Ether	10022-28-3	1127.37	871.744	454.489	8521.58	10038.8	10720.9	1.0977	0.00289797	11.934	3.57701	up
XMW0495	C6H8O2	Dehydromevalonic lactone	Ester	2381-87-5	50729.4	47639.6	49657.1	570925	580909	570241	1.12263	1.41734e-05	11.6336	3.54022	up
XMW1337	C13H28	Nonane, 3-methyl-5-propyl-	Hydrocarbons	31081-18-2	3092.69	2763.5	1408.64	111198	115566	115615	1.11436	3.41205e-05	47.1284	5.55852	up
w37	C10H16O	2-Cyclohexene-1-carboxaldehyde, 2,6,6-trimethyl-	Aldehyde	432-24-6	360410	212158	183927	1.88591e+07	2.00294e+07	2.13431e+07	1.11861	0.00123586	79.6193	6.31505	up
WMW0042	C10H16O	Bicyclo[3.1.1]heptan-3-ol, 6,6-dimethyl-2-methylene-	Terpenoids	5947-36-4	9	9	9	523004	500198	497414	1.12267	0.000255671	56319.1	15.7813	up
NMW0061	C7H7NO2	1-methyl-2-nitro-Benzene	Aromatics	88-72-2	9	9	9	200889	200674	194946	1.12266	9.58073e-05	22092.9	14.4313	up
D366	C9H16O	3-Octen-2-one, 7-methyl-	Ketone	33046-81-0	7512.82	6274.83	3294.89	264798	281163	276967	1.11419	0.000151947	48.1736	5.59017	up
XMW0529	C10H17Cl	Bicyclo[2.2.1]heptane, 2-chloro-1,7,7-trimethyl-, (1R-endo)-	Terpenoids	30462-53-4	218491	119568	103361	1.23208e+07	1.24226e+07	1.29004e+07	1.11782	0.000121644	85.2789	6.41412	up
D440	C10H20O	Cyclohexanol, 1-methyl-4-(1-methylethyl)-, cis-	Terpenoids	3901-95-9	9	9	9	201533	194626	177733	1.12261	0.00136293	21255.3	14.3755	up
NMW0052	C10H14O	2-Methyl-6-methyleneocta-2,7-dien-4-one	Terpenoids	539-70-8	39948.8	39754	68001.9	2.19093e+06	2.17578e+06	2.31816e+06	1.11765	0.000258761	45.2584	5.50011	up
KMW0338	C9H16O	2-Nonenal, (E)-	Aldehyde	18829-56-6	16759.4	22897.3	11560.5	1.38837e+06	1.40977e+06	1.21408e+06	1.11759	0.00214344	78.3372	6.29163	up
XMW0913	C10H16O	cis-Chrysanthenol	Terpenoids	55722-60-6	34782.3	58778.4	25388.6	1.52447e+06	1.53828e+06	1.49611e+06	1.11245	1.5015e-07	38.326	5.26025	up
D112	C9H10O2	Benzeneacetic acid, methyl ester	Ester	101-41-7	100182	102158	75432.4	2.36369e+06	2.47216e+06	2.75946e+06	1.12052	0.00223216	27.3437	4.77314	up
KMW0365	C10H14O2	2-((3,3-Dimethyloxiran-2-yl)methyl)-3-methylfuran	Heterocyclic compound	92356-06-4	738249	372335	623392	1.25229e+06	1.29753e+06	1.35741e+06	1.01337	0.0158503	2.25334	1.17206	up
KMW0404	C10H8	Naphthalene	Aromatics	91-20-3	163036	100325	143546	525690	317384	278749	1.01194	0.0824263	2.75696	1.46308	up
KMW0232	C9H18O2	Octanoic acid, methyl ester	Ester	111-11-5	7502.82	4889.95	6160.94	797967	798137	832346	1.12173	0.000190991	130.888	7.03218	up
XMW0073	C10H20O2	3-Methylheptyl acetate	Ester	72218-58-7	1.18255e+06	864226	1.03704e+06	9.35671e+07	9.36459e+07	9.67366e+07	1.12215	0.000111136	92.0776	6.52478	up
D406	C10H16O	2,7-Octadien-4-ol, 2-methyl-6-methylene-, (S)-	Terpenoids	35628-00-3	6612.76	9506.71	9186.74	36657.2	37301.5	50211.2	1.10147	0.014462	4.90669	2.29475	up
XMW1156	C9H13N	Cyclopentanecarbonitrile, 3-(1-methylethylidene)-	Nitrogen compounds	89683-72-7	109721	89869.1	121947	7.16279e+06	7.23224e+06	7.06525e+06	1.1218	2.59033e-05	66.7428	6.06054	up
XMW0607	C9H10O2	Formic acid, 2-phenylethyl ester	Ester	104-62-1	3590.53	5111.29	2884.53	17446.6	17125	16509.4	1.0952	0.000666055	4.40872	2.14036	up
KMW0504	C9H10O	Benzene, 1-ethenyl-4-methoxy-	Aromatics	637-69-4	5537.71	5016.67	4374.47	84581.1	86713.3	79137.9	1.12132	0.000652724	16.7751	4.06825	up
KMW0669	C6H10O3	Pantolactone	Ester	599-04-2	9	9	9	154247	151507	169922	1.12269	0.00130655	17617.6	14.1047	up
WMW0221	C10H16O	Bicyclo[3.1.0]hexan-3-one, 4-methyl-1-(1-methylethyl)-	Terpenoids	1125-12-8	5.28864e+06	3.87236e+06	4.62457e+06	4.20563e+08	4.21163e+08	4.37992e+08	1.12217	0.000170886	92.8303	6.53652	up
KMW0329	C10H16O	Camphor	Terpenoids	76-22-2	51817	55936	95665.9	3.58847e+06	3.51056e+06	3.89066e+06	1.11717	0.00089638	54.0249	5.75555	up
KMW0340	C10H20O2	2-Octanol, acetate	Ester	2051-50-5	29721.7	20629.5	26509.7	2.96145e+06	2.97227e+06	3.07156e+06	1.12194	0.000127738	117.163	6.87238	up
KMW0266	C5H6S2	2-Thiophenemethanethiol	Heterocyclic compound	6258-63-5	3.69121e+06	3.61644e+06	3.78102e+06	244638	237207	266866	1.12203	0.00011923	0.0675204	-3.88853	down
NMW0035	C8H11N	BenzenAmine, N,N-dimethyl-	Amine	121-69-7	817762	802209	831505	13481.9	13439.8	15127.4	1.12232	0.000104241	0.0171526	-5.86543	down
NMW0036	C6H9NO	1-ethenyl-2-Pyrrolidinone	Heterocyclic compound	88-12-0	6.83083e+06	6.65159e+06	6.95432e+06	787535	769336	1.20551e+06	1.11016	2.12442e-05	0.135168	-2.88718	down
WMW0194	C10H16O	Thujone	Terpenoids	546-80-5	444379	262911	220756	2.43699e+07	2.45145e+07	2.59901e+07	1.11849	0.00035844	80.6798	6.33414	up
XMW0726	C10H14O	Benzene, (1-methoxypropyl)-	Aromatics	59588-12-4	3.66997e+07	3.57614e+07	3.7563e+07	554520	569518	716830	1.12152	0.000182364	0.0167315	-5.90129	down
XMW0944	C11H18	Cyclohexene, 2-ethenyl-1,3,3-trimethyl-	Hydrocarbons	5293-90-3	463673	452887	472304	26678.4	27556.5	32139.8	1.12144	4.99051e-05	0.0621909	-4.00715	down
D401	C10H18O	2-Isopropyl-5-methylhex-2-enal	Aldehyde	35158-25-9	1.99106e+07	1.948e+07	2.02627e+07	1.37308e+06	1.34774e+06	1.99258e+06	1.11646	5.1721e-07	0.0790134	-3.66176	down
D271	C9H18O2	Propanoic acid, hexyl ester	Ester	2445-76-3	9	9	9	2.01074e+06	2.02601e+06	2.38169e+06	1.12267	0.00319305	237720	17.8589	up
XMW0527	C10H18O	2-Cyclohexen-1-ol, 1-methyl-4-(1-methylethyl)-, cis-	Alcohol	29803-82-5	12061.2	9060.17	6988.75	110315	121705	126763	1.11466	0.000894618	12.7635	3.67395	up
NMW0039	C6H14S2	DiSulfur compounds, dipropyl	Sulfur compounds	629-19-6	4474.79	2460.5	2419.61	58146.3	62420	56737.3	1.11343	0.000207549	18.953	4.24436	up
XMW0531	C10H16O	Bicyclo[3.1.1]heptan-3-one, 2,6,6-trimethyl-, (1.alpha.,2.beta.,5.alpha.)-	Terpenoids	15358-88-0	180295	250318	164563	1.60778e+06	1.61705e+06	1.5533e+06	1.11369	3.98729e-06	8.02809	3.00506	up
WMW0014	C10H16O	Pinocamphone	Terpenoids	547-60-4	27737.9	36425.9	14796.5	4.87903e+06	4.88881e+06	4.4923e+06	1.11679	0.000743363	180.599	7.49665	up
KMW0308	C6H6OS	5-Methyl-2-thiophenecarboxaldehyde	Heterocyclic compound	13679-70-4	33271.9	24359.4	29702.4	3.59028e+06	3.59606e+06	3.75575e+06	1.12223	0.000217826	125.291	6.96913	up
KMW0310	C10H16O	2-Cyclohexen-1-ol, 1-methyl-4-(1-methylethenyl)-, trans-	Alcohol	7212-40-0	200019	145767	174310	1.88688e+07	1.89328e+07	1.98231e+07	1.1222	0.000253097	110.796	6.79176	up
XMW0008	C9H14O	Isophorone	Ketone	78-59-1	1.22394e+06	890720	1.06304e+06	1.05001e+08	1.05194e+08	1.09434e+08	1.12217	0.000177132	100.585	6.65227	up
XMW0892	C3H6N2O2	Propanediamide	Amine	108-13-4	4189.21	6609.63	4810.49	27308	27177.7	25759	1.10622	4.49722e-05	5.14081	2.362	up
XMW0117	C8H16O	3,4-Dimethylcyclohexanol	Alcohol	5715-23-1	63100.1	43727.1	76822.5	5.71962e+06	5.73509e+06	5.96089e+06	1.12007	0.000150084	94.8305	6.56728	up
XMW0300	C8H10O	Phenol, 3,5-dimethyl-	Phenol	108-68-9	15738.1	16370.5	21524.5	690564	704062	633415	1.12053	0.00100581	37.8132	5.24082	up
D141	C10H20O2	Acetic acid, 2-ethylhexyl ester	Ester	103-09-3	1.18827e+06	865819	1.03965e+06	9.35736e+07	9.36502e+07	9.67448e+07	1.12214	0.000111029	91.7883	6.52024	up
NMW0047	C8H10O	Phenol, 2-ethyl-	Phenol	90-00-6	9	9	9	458473	446754	310876	1.12223	0.0133809	45040.9	15.4589	up
XMW0941	C11H16	exo-7-(trans-1-Propenyl)bicyclo[4.2.0]oct-1(2)-ene	Hydrocarbons	107983-42-6	167477	140399	364348	1.5856e+07	1.55708e+07	1.72074e+07	1.11258	0.000816468	72.348	6.17688	up
WMW0159	C10H16O	(+)-(1R,4R,5R)-2-(10)-PINEN-4-OL	Terpenoids	13040-03-4	31988.9	30048.1	33219.1	653266	651589	704280	1.12248	0.000711547	21.0919	4.39862	up
NMW0048	C9H13N	DextroamphetAmine	Amine	51-64-9	5644.64	2287.02	4950.53	82220	80063.2	85968.7	1.10517	1.84519e-05	19.2709	4.26835	up
XMW0949	C10H18O	1-Decen-3-one	Ketone	56606-79-2	43687.1	37323.3	64015	2.39185e+06	2.35371e+06	2.53447e+06	1.119	0.000419085	50.1983	5.64957	up
D329	C10H16O	Myroxide	Terpenoids	28977-57-3	190145	187195	211882	5.25093e+06	5.17792e+06	5.72364e+06	1.12224	0.00106295	27.4133	4.7768	up
XMW0814	C2H7N3S	2-Methyl-3-thiosemicarbazide	Others	21185-13-7	53824.5	38642.7	65756.7	1.7312e+06	1.67836e+06	1.88403e+06	1.11863	0.00110846	33.4563	5.06421	up
XMW0925	C10H14O	Camphenone, 6-	Ketone	55659-42-2	9	9	9	933749	947835	1.02474e+06	1.12268	0.000850855	107642	16.7159	up
XMW0253	C12H26	Undecane, 5-methyl-	Hydrocarbons	1632-70-8	9	9	9	2.25081e+06	2.24223e+06	1.99863e+06	1.12261	0.00145627	240432	17.8753	up
XMW0373	C12H26	Undecane, 2-methyl-	Hydrocarbons	7045-71-8	180884	309199	123467	1.53452e+06	1.55635e+06	1.5315e+06	1.08704	0.00139993	7.5338	2.91338	up
QWM0003	C10H16O	2H-Pyran, 3,6-dihydro-4-methyl-2-(2-methyl-1-propenyl)-	Terpenoids	1786-08-9	9	9	9	203396	197711	203331	1.12268	8.74608e-05	22386.6	14.4503	up
WMW0066	C9H18O	6-Nonen-1-ol, (E)-	Alcohol	31502-19-9	141388	200481	109100	7.35587e+06	7.39841e+06	7.14822e+06	1.11779	2.22653e-05	48.5677	5.60192	up
XMW0170	C9H10O	BenzAldehyde, 3-ethyl-	Aldehyde	34246-54-3	19845.8	6839.33	9486.15	57409.3	57240.2	67730.1	1.05581	0.000826777	5.04211	2.33403	up
KMW0359	C8H10O	Phenol, 3-ethyl-	Phenol	620-17-7	32524.1	31346	42631.6	1.51211e+06	1.60232e+06	1.46667e+06	1.12089	0.000653736	43.0143	5.42675	up
KMW0360	C10H20O	Levomenthol	Terpenoids	2216-51-5	204331	418678	202770	2.01381e+06	2.03499e+06	1.92274e+06	1.09086	0.000286275	7.2314	2.85428	up
D276	C10H14O	Bicyclo[3.1.0]hex-3-en-2-one, 4-methyl-1-(1-methylethyl)-	Terpenoids	24545-81-1	34709.5	20227.9	36536.7	86088.4	58070.2	73987.3	1.00909	0.0169005	2.38479	1.25386	up
NMW0069	C8H11N	BenzenAmine, 2,5-dimethyl-	Amine	95-78-3	63394.8	35303	55595.9	3.44108e+06	3.46552e+06	3.37394e+06	1.1194	1.59557e-05	66.6296	6.05809	up
NMW0070	C9H8O2	1,2-Propanedione, 1-phenyl-	Ketone	579-07-7	9064.59	7665.81	5171.79	108754	107372	110465	1.11509	4.86158e-07	14.9113	3.89834	up
XMW1327	C9H20N2	Propanal, dipropylhydrazone	Amine	34687-35-9	9	9	9	3668.89	4495.15	3971.2	1.12234	0.00355712	449.453	8.81203	up
XMW0721	C10H14O	Benzene, 1-methoxy-4-propyl-	Aromatics	104-45-0	23249.1	17610.6	16905.8	365904	367472	366928	1.12073	1.38651e-05	19.0478	4.25155	up
XMW0719	C10H14	p-Mentha-1,5,8-triene	Terpenoids	21195-59-5	9	9	9	1.18336e+06	1.19602e+06	1.28594e+06	1.12268	0.00069785	135753	17.0506	up
XMW1381	C10H14	Bicyclo[3.2.1]oct-2-ene, 3-methyl-4-methylene-	Terpenoids	49826-53-1	86355.1	85500.1	90876.2	2.80124e+06	2.82207e+06	2.77661e+06	1.12256	1.76587e-05	31.9715	4.99871	up
XMW0724	C12H18	Albene	Hydrocarbons	38451-64-8	28786	47870	18016.8	7.3668e+06	7.38565e+06	6.94813e+06	1.11648	0.000375618	229.217	7.84057	up
XMW0175	C9H16O	2-Nonen-4-one	Ketone	32064-72-5	2337692	1692843	2054299	177156421	177326149	183478490	1.12209	0.000122767	88.4101	6.46614	up
XMW0361	C10H16O	5,7-Octadien-4-one, 2,6-dimethyl-, (E)-	Terpenoids	6752-80-3	51961.4	55936	95782.3	3.58885e+06	3.51056e+06	3.89066e+06	1.11718	0.000895402	53.9576	5.75375	up
KMW0273	C10H14	Benzene, 1,2,4,5-tetramethyl-	Aromatics	95-93-2	23105.9	18894	12135	133888	134382	147276	1.10487	4.90607e-05	7.67611	2.94038	up
KMW0287	C9H14O	(Z,Z)-3,6-Nonadienal	Aldehyde	21944-83-2	1.90171e+07	1.85872e+07	1.94404e+07	401338	437242	620223	1.11936	6.45757e-05	0.025573	-5.28924	down
XMW1233	C8H16O	3-Cyclopentyl-1-propanol	Alcohol	767-05-5	1.90171e+07	1.85872e+07	1.94404e+07	419491	426680	620223	1.11954	6.84223e-05	0.0257061	-5.28175	down
XMW0410	C9H18O	1-Nonen-4-ol	Alcohol	35192-73-5	3.62469e+07	3.54853e+07	3.6901e+07	2.5624e+06	2.498e+06	3.69857e+06	1.11641	5.11104e-07	0.0806289	-3.63256	down
XMW0437	C10H16	1,5-Cyclooctadiene, 1,6-dimethyl-	Hydrocarbons	3760-13-2	1.31301e+07	1.28242e+07	1.34317e+07	205434	209776	196757	1.12265	0.00018287	0.0155377	-6.00809	down
NMW0038	C8H10O	Benzenemethanol, 4-methyl-	Alcohol	589-18-4	1.13958e+07	1.11488e+07	1.16595e+07	227719	230511	269407	1.12203	0.000155814	0.0212733	-5.55481	down
D98	C7H8S	Benzene, (methylthio)-	Sulfur compounds	100-68-5	540851	572727	514671	271769	261557	215075	1.10166	0.00026871	0.459636	-1.12144	down
XMW0909	C10H14O	2,6,6-Trimethylbicyclo[3.2.0]hept-2-en-7-one	Ketone	4613-37-0	9	9	9	1949566	1959151	1961283	1.12267	3.39129e-06	217407	17.73	up
XMW0690	C11H18	Cyclohexene, 2,4-dimethyl-1-(1-methylethenyl)-	Hydrocarbons	56763-60-1	9	9	9	615506	618318	541906	1.12259	0.00178134	65767.8	16.0051	up
NMW0040	C9H10O	Benzyl methyl ketone	Ketone	103-79-7	204952	207667	143332	5.71822e+06	5.71357e+06	5.98021e+06	1.12008	0.000119174	31.3194	4.96898	up
KMW0293	C8H12O	2,4-Octadienal, (E,E)-	Aldehyde	30361-28-5	354416	206352	185252	1.99345e+07	2.01702e+07	2.1489e+07	1.11895	0.000495669	82.5629	6.36742	up
XMW1311	C7H6O2	2-Propenal, 3-(2-furanyl)-	Heterocyclic compound	623-30-3	9	9	9	868163	904275	935531	1.12267	0.000464654	100295	16.6139	up
D313	C10H20O2	3-Hexene, 1-(1-ethoxyethoxy)-, (Z)-	Aldehyde	28069-74-1	891157	844921	960637	186813	185359	262424	1.10666	0.000133854	0.235322	-2.08729	down
D192	C10H18O	Fenchol	Terpenoids	1632-73-1	331470	187912	156575	1.94811e+07	1.96599e+07	2.07037e+07	1.11802	0.000293441	88.533	6.46814	up
D392	C7H7NO	Ethanone, 1-(3-pyridinyl)-	Heterocyclic compound	350-03-8	9	9	9	34130.4	33570.2	37127.8	1.12269	0.000997952	3882.53	11.9228	up
XMW1127	C9H18O2	Formic acid, octyl ester	Ester	112-32-3	9	9	9	585618	586698	598856	1.12267	5.168e-05	65599	16.0014	up
XMW1318	C8H8O2	2-Methyl-3(2-furyl)acrolein	Heterocyclic compound	874-66-8	1.48267e+07	1.44806e+07	1.51683e+07	347764	357944	438978	1.12151	0.000142166	0.0257374	-5.27999	down
KMW0304	C10H14	1,3,8-p-Menthatriene	Terpenoids	18368-95-1	270837	289125	182440	3.37407e+06	3.43243e+06	3.54284e+06	1.11625	3.27429e-06	13.9403	3.80119	up
XMW0932	C11H18	3-Nonen-5-yne, 4-ethyl-, (Z)-	Hydrocarbons	74744-26-6	297736	218327	246634	2.75562e+07	2.77002e+07	2.88069e+07	1.12223	0.000193264	110.219	6.78422	up
XMW0918	C10H16O	Isocyclocitral	Aldehyde	1335-66-6	9	9	9	5.23414e+06	5.24213e+06	4.78224e+06	1.12263	0.000891711	565130	19.1082	up
XMW0798	C12H18	Benzene, 1,3-bis(1-methylethyl)-	Aromatics	99-62-7	9	9	9	23832.8	23429.2	24003.9	1.12268	5.146e-05	2639.48	11.366	up
XMW0449	C8H14O3	Butanoic acid, anhydride	Others	106-31-0	62980.9	43321.9	58599.8	5.71979e+06	5.73517e+06	5.96267e+06	1.12173	0.000172401	105.624	6.72279	up
D173	C9H10O	BenzeneacetAldehyde, 4-methyl-	Aldehyde	104-09-6	45165	35145.5	40565	4.04293e+06	4.06908e+06	4.24055e+06	1.12242	0.000224445	102.192	6.67514	up
XMW1399	C13H28	Decane, 2,5,9-trimethyl-	Hydrocarbons	62108-22-9	29911	19878	25203	1906372	1918342	1910053	1.12151	4.35866e-10	76.4717	6.25685	up
NMW0043	C10H14O	Bicyclo[3.1.1]hept-2-en-6-one, 2,7,7-trimethyl-	Terpenoids	473-06-3	169890	127665	148314	1.49098e+07	1.49534e+07	1.55781e+07	1.12231	0.000198481	101.916	6.67124	up
KMW0312	C10H14O	Furan, 3-(4-methyl-3-pentenyl)-	Terpenoids	539-52-6	3.50302e+07	3.42324e+07	3.58176e+07	988269	957481	1.23829e+06	1.12112	0.000109236	0.030301	-5.04449	down
NMW0044	C8H11N	BenzenAmine, N-ethyl-	Amine	103-69-5	13847.6	19154.8	9297.99	988261	1.00283e+06	1.03104e+06	1.11724	7.92363e-05	71.4445	6.15875	up
XMW0780	C10H14	2,6-Dimethyl-1,3,5,7-octatetraene, E,E-	Terpenoids	460-01-5	9	9	9	3.23234e+07	3.25631e+07	3.39937e+07	1.12268	0.000250189	3.66223e+06	21.8043	up
KMW0320	C9H16O2	Cyclohexanecarboxylic acid, ethyl ester	Ester	3289-28-9	39959.8	39719.2	69105.2	2.13871e+06	2.12516e+06	2.27062e+06	1.11727	0.00028559	43.9192	5.45678	up
WMW0015	C10H18O	Terpinen-4-ol	Terpenoids	562-74-3	244065	170887	151295	7.76863e+06	8.02128e+06	7.93013e+06	1.12004	1.16461e-05	41.89	5.38853	up
KMW0325	C10H18O	3-Cyclohexen-1-ol, 1-methyl-4-(1-methylethyl)-	Terpenoids	586-82-3	119631	122098	190119	6.03127e+06	5.8893e+06	6.4997e+06	1.11882	0.000804259	42.6545	5.41463	up
XMW0068	C11H18O	2,7-Nonadien-5-one, 4,6-dimethyl-	Ketone	74630-80-1	276712	253119	198026	1.30637e+06	1.29327e+06	1.3981e+06	1.1154	2.75582e-05	5.49248	2.45746	up
D167	C10H18O	1,7,7-Trimethylbicyclo[2.2.1]heptan-2-ol	Terpenoids	10385-78-1	86978.2	65191.7	74222.3	1.3592e+06	1.36226e+06	1.37746e+06	1.12139	1.35636e-08	18.1054	4.17835	up
XMW0826	C7H6N2O	3-Methylisoxazolo[4,5-b]pyridine	Heterocyclic compound	83988-39-0	120988	110524	164242	2.89173e+06	2.83747e+06	3.13243e+06	1.11926	0.000741144	22.3918	4.4849	up
XMW0599	C7H10O3	2,2,6-Trimethyl-4H-1,3-dioxin-4-one	Heterocyclic compound	5394-63-8	276712	253119	198026	1.30637e+06	1.29327e+06	1.39942e+06	1.11539	3.01051e-05	5.4943	2.45794	up
XMW0362	C8H14O2	2H-Pyran-2-one, tetrahydro-4,6,6-trimethyl-	Heterocyclic compound	20628-36-8	9	9	9	10373.1	10315.8	14870.3	1.12223	0.015841	1317.01	10.363	up
KMW0327	C10H16O	Limonene oxide, trans-	Terpenoids	4959-35-7	37357.3	34503.1	40438.9	697158	681835	750665	1.12212	0.00089696	18.9641	4.2452	up
KMW0334	C10H18O	Cyclohexanone, 5-methyl-2-(1-methylethyl)-	Terpenoids	10458-14-7	6770.8	6242.58	7768.55	1.18876e+06	1.20954e+06	1.11727e+06	1.12223	0.000573304	169.165	7.40229	up
XMW0927	C9H12O2	2,6,6-Trimethyl-2-cyclohexene-1,4-dione	Ketone	1125-21-9	9	9	9	206684	196094	205055	1.12269	0.000263948	22512.3	14.4584	up
NMW0050	C8H7N	Benzyl nitrile	Nitrogen compounds	140-29-4	31685.5	39210.3	32515.2	673558	655141	721132	1.12112	0.000788039	19.8222	4.30904	up
D342	C10H16	2,4,6-Octatriene, 2,6-dimethyl-, (E,E)-	Terpenoids	3016-19-1	95080.6	68948	75150.8	495516	490154	606715	1.11548	0.00538419	6.65771	2.73503	up
XMW0657	C8H7NO	Benzoxazole, 2-methyl-	Heterocyclic compound	95-21-6	5008.32	3540.81	6849.41	197885	192404	218246	1.11699	0.00137551	39.519	5.30447	up
D323	C6H8N2S	Pyrazine, 2-methyl-3-(methylthio)-	Heterocyclic compound	2882-20-4	1321.37	658.881	991.311	37504	40546	39193	1.11696	0.000313448	39.455	5.30214	up
XMW1226	C10H20O2	Hexanoic acid, 2-methylpropyl ester	Ester	105-79-3	9	9	9	34114.4	33290.8	36683.8	1.12269	0.000866568	3855.15	11.9126	up
XMW0654	C10H16O	Ethanone, 1-(1,4-dimethyl-3-cyclohexen-1-yl)-	Terpenoids	43219-68-7	45811.8	34092.5	39564.1	514959	533038	523024	1.12078	1.1029e-06	13.1501	3.717	up
NMW0053	C9H8O	2-Phenylpropenal	Aromatics	4432-63-7	1339.3	1092.77	1074.19	32007.2	34277.6	36315.8	1.12186	0.00135427	29.2622	4.87097	up
XMW0801	C12H18	Cyclohexene, 3,4-diethenyl-1,6-dimethyl-	Hydrocarbons	61142-14-1	32376.5	33357.2	117711	1.95581e+06	1.91887e+06	1.82039e+06	1.09229	9.1326e-06	31.0452	4.9563	up
KMW0343	C9H16O	2-Nonenal	Aldehyde	2463-53-8	15628.4	16985.6	8173.24	5.00459e+06	4.99014e+06	4.62572e+06	1.11931	0.000646368	358.457	8.48565	up
KMW0345	C9H14O	2,6-Nonadienal, (E,Z)-	Aldehyde	557-48-2	9	9	9	325445	368220	374567	1.12262	0.00187149	39564.1	15.2719	up
D412	C10H16O	5,7-Octadien-4-one, 2,6-dimethyl-, (Z)-	Terpenoids	3588-18-9	94867.7	71904.9	85535.8	1.46529e+06	1.45708e+06	1.46339e+06	1.1214	2.27439e-06	17.3825	4.11957	up
NMW0058	C10H12	Naphthalene, 1,2,3,4-tetrahydro-	Aromatics	119-64-2	3089.36	4137.96	2576.67	155790	156777	144587	1.11936	0.0005906	46.6294	5.54317	up
NMW0059	C5H6N2	4-Aminopyridine	Heterocyclic compound	504-24-5	9	9	9	1.63048e+06	1.64014e+06	1.63343e+06	1.12267	3.05611e-06	181631	17.4707	up
KMW0362	C10H18O	Isoborneol	Terpenoids	124-76-5	94614.2	71904.9	85893.6	1.40198e+06	1.39341e+06	1.39756e+06	1.12136	2.4598e-06	16.6115	4.05411	up
KMW0351	C9H14N2	Pyrazine, 2,3-diethyl-5-methyl-	Heterocyclic compound	18138-04-0	2550.62	2232.19	3930.92	767983	793922	912109	1.12051	0.00289748	283.921	8.14935	up
XMW0679	C8H16O4	AcetAldehyde, tetramer	Aldehyde	108-62-3	9	9	9	123171	124004	116265	1.12263	0.000409711	13460.7	13.7165	up
XMW1137	C10H16O	Ethanone, 1-(1,3-dimethyl-3-cyclohexen-1-yl)-	Ketone	51733-68-7	40244.8	59310.9	25305.7	1.52072e+06	1.53549e+06	1.49229e+06	1.1123	1.8722e-07	36.4283	5.18699	up
KMW0389	C10H18O	endo-Borneol	Terpenoids	507-70-0	731180	372617	617111	1.38546e+06	1.42453e+06	1.48028e+06	1.03579	0.0109244	2.49303	1.3179	up
KMW0350	C9H10O2	Acetic acid, phenylmethyl ester	Ester	140-11-4	10136.8	12922.2	14534.2	5.23657e+06	5.32621e+06	5.60522e+06	1.1217	0.000425242	430.077	8.74845	up
NMW0064	C10H14O	Benzofuran, 4,5,6,7-tetrahydro-3,6-dimethyl-	Terpenoids	494-90-6	12448.7	17395	30660.8	1.05385e+06	1.13631e+06	915127	1.11154	0.00381276	51.3231	5.68154	up
KMW0408	C10H14O	Benzenemethanol, .alpha.,.alpha.,4-trimethyl-	Terpenoids	1197-01-9	1528.39	1109.23	1443.06	28302.6	28851	29726.5	1.12085	6.74445e-05	21.2906	4.41214	up
D439	C10H20O	Cyclohexanol, 1-methyl-4-(1-methylethyl)-, trans-	Terpenoids	3901-93-7	263805	420211	199668	2.01922e+06	2.04706e+06	1.92054e+06	1.09495	0.000118092	6.77485	2.76019	up
D365	C8H10N2O	2-Acetyl-3-ethylpyrazine	Heterocyclic compound	32974-92-8	6010.63	5082.75	6085.56	349427	387983	289744	1.12112	0.00712253	59.7915	5.90187	up
WMW0197	C10H16O2	Lilac Aldehyde D	Aldehyde	53447-47-5	180240	250318	164505	1.64255e+06	1.65519e+06	1.59336e+06	1.11388	4.42955e-06	8.21945	3.03904	up
WMW0065	C9H18O	(6Z)-Nonen-1-ol	Alcohol	35854-86-5	139536	191718	109100	7.35683e+06	7.39841e+06	7.14822e+06	1.11851	3.01011e-05	49.7407	5.63635	up
KMW0361	C9H10O	BenzAldehyde, 4-ethyl-	Aldehyde	4748-78-1	7014	4830	5108	30448	33198	28774	1.11209	0.00038811	5.45186	2.44675	up
XMW0304	C10H18O2	Butanoic acid, 5-hexenyl ester	Ester	108058-75-9	243519	175070	153291	7772550	8025991	7935155	1.12024	1.36709e-05	41.5012	5.37508	up
D307	C10H18O	Bicyclo[3.1.1]heptan-3-ol, 2,6,6-trimethyl-, (1.alpha.,2.beta.,3.alpha.,5.alpha.)-	Terpenoids	27779-29-9	15525.2	7788.72	7120.22	423741	437579	443971	1.11463	1.64396e-05	42.8891	5.42254	up
WMW0011	C10H16O	Cyclohexanone, 5-methyl-2-(1-methylethenyl)-	Terpenoids	529-00-0	31196.5	22238.7	26211.5	945819	985922	975876	1.12149	8.69939e-05	36.5064	5.19008	up
WMW0041	C10H16O	Isopinocarveol	Terpenoids	6712-79-4	23951.4	17747.2	14664.6	649377	671130	662732	1.11971	7.62864e-06	35.1868	5.13696	up
KMW0368	C7H8O2S	Ethanethioic acid, S-(2-furanylmethyl) ester	Heterocyclic compound	13678-68-7	70628.7	60614.9	71055.7	4.23398e+06	4.28342e+06	4.00106e+06	1.12236	0.000441334	61.8809	5.95142	up
XMW0660	C8H14O2	2-Octenoic Acid	Acid	1470-50-4	9	9	9	35132.6	38151.6	37670.6	1.12263	0.000640877	4109.44	12.0047	up
D348	C10H18O	Cyclobutaneethanol, 1-methyl-2-(1-methylethenyl)-, cis-	Alcohol	30820-22-5	37509	28642	24425.4	1.17173e+06	1.2154e+06	1.19706e+06	1.1206	3.22808e-05	39.5708	5.30636	up
XMW0487	C6H6N2O2	2-Picoline, 6-nitro-	Heterocyclic compound	18368-61-1	41917.1	32656.8	27841.2	1.14749e+06	1.18772e+06	1.19345e+06	1.12065	5.34993e-05	34.4546	5.10662	up
XMW0241	C13H28	Undecane, 4,8-dimethyl-	Hydrocarbons	17301-33-6	9	9	9	6007.76	6365.63	6788.24	1.12263	0.00124831	709.69	9.47105	up
KMW0374	C10H18O	4-Hexen-1-ol, 5-methyl-2-(1-methylethenyl)-, (R)-	Terpenoids	498-16-8	236704	349484	177215	2.1536e+07	2.16775e+07	2.08694e+07	1.118	7.84826e-05	83.9439	6.39135	up
KMW0380	C9H14N2O	Pyrazine, 2-methoxy-3-(2-methylpropyl)-	Heterocyclic compound	24683-00-9	2823.35	2649	1709.78	22581.2	25721.1	22098.1	1.11157	0.00142095	9.80214	3.2931	up
KMW0376	C9H20O	2-Nonanol	Alcohol	628-99-9	725685	684885	764553	208249	205957	280687	1.1028	0.00012902	0.319473	-1.64623	down
XMW0612	C13H28	Undecane, 4,7-dimethyl-	Hydrocarbons	17301-32-5	6272.44	5675.28	3784	158932	163834	159707	1.11852	3.84205e-06	30.6688	4.9387	up
KMW0431	C8H10N2	5H-5-Methyl-6,7-dihydrocyclopentapyrazine	Heterocyclic compound	23747-48-0	49980.6	41934.8	106590	4.38891e+06	4.3456e+06	4.77074e+06	1.11274	0.000733751	68.0347	6.0882	up
KMW0496	C8H16O3	Hexanoic acid, 3-hydroxy-, ethyl ester	Ester	2305-25-1	51951.1	51242.4	72735.5	309259	305769	379018	1.10975	0.00455404	5.65027	2.49832	up
KMW0531	C9H16O	3,6-Nonadien-1-ol, (E,Z)-	Alcohol	56805-23-3	9	9	9	956820	847894	976294	1.1227	0.0018523	103000	16.6523	up
KMW0543	C10H18O2	(3R,6R)-2,2,6-Trimethyl-6-vinyltetrahydro-2H-pyran-3-ol	Heterocyclic compound	14009-71-3	180573	299319	139533	6.28992e+06	6.34101e+06	6.05658e+06	1.11272	7.30644e-06	30.1691	4.915	up
KMW0284	C8H10O	Phenylethyl Alcohol	Alcohol	60-12-8	9	9	9	1.07258e+06	1.08627e+06	1.17603e+06	1.12268	0.000850708	123514	16.9143	up
KMW0386	C10H16O	cis-Dihydrocarvone	Terpenoids	3792-53-8	855598	767465	659191	208748	216113	237666	1.1111	0.00960012	0.290295	-1.78441	down
NMW0093	C10H14O	D-Verbenone	Terpenoids	18309-32-5	17785.4	13247.9	17586.5	78339.4	81709.3	104207	1.11079	0.0105768	5.43515	2.44232	up
XMW0943	C13H28	Undecane, 3,5-dimethyl-	Hydrocarbons	17312-81-1	19925.1	14638.9	8976.24	9	9	9	1.12004	0.0443661	0.000620116	-10.6552	down
D81	C9H12O3	2-Furanpropanoic acid, ethyl ester	Heterocyclic compound	10031-90-0	2764595	2171300	1.88155e+06	1027263	1037329	1149318	1.06693	0.041089	0.471424	-1.0849	down
XMW0239	C13H28	Decane, 3-ethyl-3-methyl-	Hydrocarbons	17312-66-2	16888.7	14161.6	18214.3	1.26544e+06	1.28701e+06	1.52802e+06	1.12192	0.00389399	82.8276	6.37204	up
XMW1401	C11H20O2	n-Valeric acid cis-3-hexenyl ester	Ester	35852-46-1	10129.3	11211.4	17257	628466	625718	813783	1.1178	0.00829505	53.5776	5.74356	up
NMW0101	C10H16O2	Ascaridole	Terpenoids	512-85-6	32026.1	28188.6	32940.8	115500	130743	56437.2	1.01138	0.0905023	3.24919	1.70008	up
XMW0586	C13H28	Dodecane, 5-methyl-	Hydrocarbons	17453-93-9	917963	666187	756715	2973.05	2603.42	3568	1.12085	0.00885472	0.00390645	-7.99993	down
KMW0435	C10H18O	2-Decenal, (Z)-	Aldehyde	2497-25-8	59147278	4.18779e+07	4.74462e+07	9	9	9	1.12244	0.0104085	1.81853e-07	-22.3907	down
NMW0074	C10H16O	Bicyclo[3.1.1]hept-2-ene-2-methanol, 6,6-dimethyl-	Terpenoids	515-00-4	1.07026e+06	938009	817275	4.14642e+06	4.2075e+06	3.08147e+06	1.10414	0.0131856	4.04715	2.01691	up
KMW0434	C10H16O	2,6,6-trimethyl-1-Cyclohexene-1-carboxaldehyde	Terpenoids	432-25-7	32431.5	22246.8	19316.4	59465.8	62179.3	72270.9	1.06721	0.00199305	2.62067	1.38994	up
D188	C5H5N3O	Pyrazinamide	Heterocyclic compound	98-96-4	2.46262e+08	1.75651e+08	2.00333e+08	18941.4	59677.8	168421	1.10866	0.00981084	0.000397014	-11.2985	down
XMW1295	C10H24N2	1,6-HexanediAmine, N,N,N',N'-tetramethyl-	Amine	111-18-2	2732	4088	1554.45	9	9	9	1.11735	0.0627593	0.00322409	-8.27689	down
KMW0424	C11H22O2	Butanoic acid, 2-methyl-, hexyl ester	Ester	10032-15-2	638.724	984.506	1793.21	836276	796232	1.00443e+06	1.11759	0.00523659	771.837	9.59215	up
XMW0740	C7H7N3	3-Methyl-pyrrolo(2,3-b)pyrazine	Heterocyclic compound	20321-99-7	1524.7	1345.84	2027	7659.4	7200.1	5215	1.09072	0.015954	4.09889	2.03523	up
XMW0441	C2H2ClN3	1H-1,2,4-Triazole, 3-chloro-	Heterocyclic compound	6818-99-1	9	9	9	68573.1	66481.5	86905.2	1.12259	0.00760281	8220.73	13.0051	up
XMW0727	C9H10O	BenzAldehyde, 2,5-dimethyl-	Aldehyde	5779-94-2	9	9	9	294201	294167	297990	1.12267	1.84403e-05	32828.1	15.0026	up
NMW0095	C8H6N2	Quinoxaline	Heterocyclic compound	91-19-0	9	9	9	4533	4037.05	5128.8	1.12256	0.00476154	507.365	8.98688	up
XMW1465	C10H16O2	7-Oxabicyclo[4.1.0]heptan-2-one, 6-methyl-3-(1-methylethyl)-	Ketone	5286-38-4	105916456	77349607	86219980	4983.81	23200	81064	1.10144	0.00872256	0.000405393	-11.2684	down
D110	C10H16O2	Bicyclo[3.1.1]heptan-3-one, 2-hydroxy-2,6,6-trimethyl-	Ketone	10136-65-9	88143109	63353545	71746643	4396.88	18789.6	53033	1.1057	0.00944013	0.000341419	-11.5162	down
KMW0449	C11H18O2	Bicyclo[2.2.1]heptan-2-ol, 1,7,7-trimethyl-, formate, endo-	Ester	7492-41-3	7861.1	6277.04	11105.5	103043	109373	117278	1.1134	0.00058716	13.0605	3.70713	up
WMW0083	C10H20O	2-Decen-1-ol, (E)-	Alcohol	18409-18-2	2553004	1872818	2092293	9	9	9	1.1224	0.00840259	4.1423e-06	-17.8811	down
D134	C7H12O5	Glycerol 1,2-diacetate	Ester	102-62-5	9	9	9	29343	28881	32482	1.12268	0.0013977	3359.48	11.714	up
XMW0933	C12H18O2	Bicyclo[3.1.1]hept-2-en-6-ol, 2,7,7-trimethyl-, acetate, [1S-(1.alpha.,5.alpha.,6.beta.)]-	Ester	50764-55-1	32227.1	23318.2	32771.1	166324	172154	105577	1.09133	0.0286416	5.028	2.32999	up
XMW0089	C10H18O	4-Decenal, (E)-	Aldehyde	65405-70-1	18367.2	18321.3	13239.1	2.31009e+06	2.30651e+06	2.87474e+06	1.12143	0.00574139	150.044	7.22924	up
NMW0071	C10H18O	L-.alpha.-Terpineol	Terpenoids	10482-56-1	4510655	3968039	3448155	1442058	1468361	1537135	1.10684	0.0142018	0.372903	-1.42313	down
XMW0269	C10H18O3	2-Methylbutanoic anhydride	Others	1468-39-9	19875.9	34670.5	33008.3	1.55751e+06	1.44635e+06	1.64053e+06	1.11734	0.00128116	53.0455	5.72916	up
NMW0075	C10H18O	Cyclohexanol, 1-methyl-4-(1-methylethylidene)-	Terpenoids	586-81-2	5.15155e+06	4.59293e+06	3.90594e+06	1.60449e+06	1.58583e+06	1.69749e+06	1.10686	0.0142232	0.35807	-1.48169	down
XMW0246	C10H16O2	OxiranecarboxAldehyde, 3-methyl-3-(4-methyl-3-pentenyl)-	Aldehyde	16996-12-6	7918.9	6833	7196.55	227370	213914	280833	1.12164	0.00756878	32.9006	5.04004	up
D245	C10H14O	4-Phenyl-2-butanol	Alcohol	2344-70-9	9035.94	11194.9	11364.3	42909.8	43335.9	27932.5	1.0852	0.0299568	3.61378	1.85351	up
XMW0534	C10H14O	Bicyclo[3.1.1]hept-3-en-2-one, 4,6,6-trimethyl-, (1S)-	Terpenoids	1196-01-6	18308.1	24717.2	16570.4	540498	539006	474598	1.11875	0.00168916	26.0774	4.70473	up
XMW0711	C7H7NO	Formamide, N-phenyl-	Amine	103-70-8	36036.3	23255.1	29165.6	313115	321921	430107	1.11469	0.012462	12.0414	3.58993	up
KMW0385	C10H18O	2-methyl-5-(1-methylethenyl)-Cyclohexanol	Terpenoids	619-01-2	5.15026e+06	4.58833e+06	3.90361e+06	1.63494e+06	1.65739e+06	1.72604e+06	1.10653	0.0149427	0.367857	-1.44278	down
WMW0024	C10H14O	Verbenone	Terpenoids	80-57-9	18030.9	22302	15090.5	540498	539006	474598	1.1194	0.00173572	28.0405	4.80944	up
XMW0296	C10H20O2	Acetic acid, octyl ester	Ester	112-14-1	1606.09	900.889	1104.06	13044.2	14038.5	13362.5	1.11313	1.13223e-05	11.2004	3.48548	up
XMW0367	C13H28	Undecane, 2,4-dimethyl-	Hydrocarbons	17312-80-0	5679.52	11125	2779.15	48750.7	43237.8	59038	1.05084	0.00342297	7.71186	2.94708	up
KMW0377	C11H20O2	cis-3-Hexenyl-.alpha.-methylbutyrate	Ester	53398-85-9	7539.55	6523.37	8927.29	492203	472302	605941	1.12122	0.00643813	68.3093	6.09401	up
XMW0911	C10H18O2	1-Octen-1-ol, acetate	Alcohol	77149-68-9	727.507	789.247	650.184	65940	61777.6	72172.6	1.12221	0.00209053	92.2455	6.52741	up
KMW0381	C10H20O2	Hexanoic acid, butyl ester	Ester	626-82-4	3657.58	7545.13	7739.16	741623	699033	788342	1.11591	0.00119195	117.676	6.87867	up
D332	C9H15N	2-Nonenenitrile	Nitrogen compounds	29127-83-1	343012	307059	258210	954165	974275	716903	1.09103	0.0139075	2.91247	1.54224	up
XMW1092	C10H12O2	spiro[3-oxatricyclo[3.3.1.02,4]nonane-8,1'-cyclopropane]-6-one	Ketone	109637-57-2	1.07306e+06	940920	820308	4.16279e+06	4.21835e+06	3.10179e+06	1.10448	0.0128642	4.05144	2.01843	up
XMW0408	C8H14O2	1-Methylcyclohexylcarboxylic Acid	Acid	1123-25-7	10739.8	15732.8	7229.96	9	9	9	1.12057	0.04506	0.000801125	-10.2857	down
NMW0080	C8H18O2	1,2-Octanediol	Alcohol	1117-86-8	9953.74	14907.4	7220.9	9	9	9	1.12086	0.0415801	0.000841591	-10.2146	down
XMW0926	C10H12O	Ethanone, 1-(2,4-dimethylphenyl)-	Ketone	89-74-7	8471	6659	9282.72	219839	238168	191304	1.11979	0.00415797	26.5973	4.73321	up
KMW0452	C10H12O	4-(1-methylethyl)-Benzaldehyde	Terpenoids	122-03-2	8953.15	6924.38	8930.28	219038	237782	196314	1.12062	0.00318131	26.3278	4.71851	up
XMW0526	C10H16O	AcetAldehyde, (3,3-dimethylcyclohexylidene)-, (Z)-	Aldehyde	26532-24-1	17644.3	8650.79	15345.4	177476	175347	244844	1.10651	0.0138549	14.3531	3.84329	up
KMW0372	C10H20O2	Butanoic acid, hexyl ester	Ester	2639-63-6	15947.7	14338.8	11890.5	9	9	9	1.12222	0.00697451	0.000640158	-10.6093	down
XMW0243	C13H28	Undecane, 2,5-dimethyl-	Hydrocarbons	17301-22-3	15686	12418.8	6502.37	9	9	9	1.11921	0.0502984	0.000780185	-10.3239	down
XMW0588	C7H13N3O	1,3,5-Triazaadamantan-7-ol	Heterocyclic compound	130267-10-6	5386.23	3138.35	2774.92	129908	133825	135850	1.11658	1.24642e-05	35.3629	5.14416	up
XMW1142	C10H14O	5-propan-2-ylbicyclo[3.1.0]hex-2-ene-2-carbAldehyde	Aldehyde	57129-54-1	35242	65545.8	22167.8	611091	665712	501524	1.09168	0.00498616	14.4632	3.85431	up
XMW0492	C6H9NO2	2,5-Pyrrolidinedione, 1-ethyl-	Heterocyclic compound	2314-78-5	4368.61	7516.93	7692.2	726187	684706	772679	1.11853	0.00121686	111.533	6.80133	up
NMW0072	C10H18O	(1.alpha.,2.beta.,5.alpha.)-2-methyl-5-(1-methylethenyl)-Cyclohexanol	Terpenoids	38049-26-2	5.15261e+06	4.5895e+06	3.90597e+06	1.69417e+06	1.71626e+06	1.77714e+06	1.10565	0.0155917	0.380096	-1.39557	down
XMW0835	C12H18	Benzene, 1-methyl-2-(1-ethylpropyl)-	Aromatics	54410-74-1	15196.5	16849.8	17281.8	162957	169139	147293	1.12069	0.00188621	9.71838	3.28072	up
XMW0773	C4H9NO5	Ethanol, 2-(2-hydroxyethoxy)-, 1-nitrate	Alcohol	20633-16-3	69812	53871.8	47953.2	14340	13534	14961	1.10571	0.02198	0.249567	-2.0025	down
XMW0122	C10H18O	Cyclohexanol, 2-methyl-3-(1-methylethenyl)-, (1.alpha.,2.alpha.,3.alpha.)-	Alcohol	54244-81-4	210381	152772	110380	46645.3	45790.6	64390.4	1.03901	0.0622052	0.331183	-1.5943	down
XMW1457	C8H8O2	BenzAldehyde, 3-methoxy-	Aldehyde	591-31-1	4722961	4244955	3638604	1452972	1474191	1539738	1.10909	0.0126559	0.354333	-1.49682	down
KMW0388	C10H16O	Carveol	Terpenoids	99-48-9	13087.8	12378.2	13575.1	61599.5	68298.9	79095.3	1.11829	0.00777428	5.35317	2.42039	up
XMW1074	C10H18O	1-Cyclopentene-1-methanol, 2-methyl-5-(1-methylethyl)-	Alcohol	80113-82-2	103771	71780	112720	284018	318012	398513	1.08493	0.011957	3.47084	1.79528	up
KMW0406	C12H26	Dodecane	Hydrocarbons	112-40-3	43305.2	21639.8	20927.2	1.69217e+06	1.65709e+06	2.20115e+06	1.11595	0.00909369	64.6358	6.01426	up
XMW0725	C10H16O	(-)-cis-Isopiperitenol	Terpenoids	96555-02-1	10599.5	7361.6	4739.18	158876	143947	172876	1.11079	0.00220797	20.9556	4.38927	up
XMW0794	C12H18	1,5-Cyclooctadiene, 3-(1-methyl-2-propenyl)-	Hydrocarbons	16538-88-8	37527.1	54245.9	25610.3	9	9	9	1.12128	0.0422374	0.000230016	-12.086	down
NMW0082	C10H16O	(-)-trans-Isopiperitenol	Terpenoids	74410-00-7	9009.25	7871.96	5427.29	142664	142980	164413	1.11722	0.00212428	20.1742	4.33444	up
NMW0084	C10H16O	(-)-Myrtenol	Terpenoids	19894-97-4	38599.4	54901.3	25253.3	11844.6	8907.72	9016.8	1.05606	0.0725749	0.250678	-1.99609	down
D287	C10H16O	Cyclopentanone, 2-(3-methyl-2-buten-1-yl)-	Ketone	2520-60-7	11710.1	7081.11	4741.85	137875	157563	193784	1.10621	0.0100557	20.7887	4.37773	up
XMW1326	C7H11NO2	2,6-Piperidinedione, 3-ethyl-	Heterocyclic compound	25115-69-9	1827	875.849	1437.94	6223.32	5609.19	3800.18	1.04767	0.022965	3.77529	1.91659	up
XMW1379	C12H20	Cyclooctane, 1,5-dimethyl-2,6-bis(methylene)-	Hydrocarbons	74301-13-6	9796.71	10778.1	5092.85	29226.5	30979.2	27545.2	1.05228	0.00156904	3.41874	1.77346	up
XMW0213	C11H22O2	Isopentyl hexanoate	Ester	2198-61-0	1.08303e+07	7.75817e+06	8.76431e+06	9	9	9	1.12242	0.00969329	9.87104e-07	-19.9503	down
XMW0491	C3H7N5	3-Methyl-4,5-diamino-1,2,4(4H)-triazole	Heterocyclic compound	21532-07-0	2328.93	1026.62	1455.34	9	9	9	1.11698	0.0531791	0.00561226	-7.4772	down
D113	C10H14O2	Benzene, (2,2-dimethoxyethyl)-	Aromatics	101-48-4	9	9	9	18709.9	17690	22509	1.1226	0.0055342	2181.81	11.0913	up
WMW0216	C12H20O2	Fenchyl acetate	Ester	13851-11-1	9	9	9	199486	202742	285563	1.1225	0.0147603	25473.7	14.6367	up
XMW1064	C8H12N2	1,4-Methano-1H-Cyclopropa[d]pyridazine, 4,4a,5,5a-tetrahydro-6,6-dimethyl-, (1.alpha.,4.alpha.,4a.alpha.,5a.alpha.)-	Heterocyclic compound	109746-10-3	140417	93348.5	106039	651527	664248	889467	1.10907	0.012915	6.48974	2.69816	up
NMW0092	C10H18O	(+)-neodihydrocarveol	Terpenoids	18675-33-7	33142	24484.8	26193.8	158517	162202	173694	1.11739	7.79936e-05	5.89846	2.56034	up
XMW1087	C7H10O4	2(3H)-Furanone, 5-(acetyloxy)dihydro-5-methyl-	Heterocyclic compound	57681-51-3	9	9	9	61169.4	53964.2	72995.3	1.1226	0.00773732	6967.74	12.7665	up
XMW0545	C10H15N	Benzenemethanamine, N-(1-methylethyl)-	Amine	102-97-6	70743	56930.7	63651	267405	273981	349787	1.11343	0.0112145	4.65791	2.21968	up
XMW0238	C13H28	Undecane, 4,4-dimethyl-	Hydrocarbons	17312-68-4	13374.2	12728.2	13298.5	601943	592278	763243	1.12196	0.00743666	49.6806	5.63461	up
D376	C10H14O	(Z)-2,6-Dimethylocta-2,5,7-trien-4-one	Ketone	33746-71-3	14393.2	15439.1	15519.5	29632.6	31122.9	34542.8	1.11191	0.0052061	2.10132	1.07129	up
D290	C10H12O	2-Butanone, 4-phenyl-	Ketone	2550-26-7	6069.11	4999.7	6244.59	177045	189563	149927	1.12074	0.00486725	29.8344	4.89891	up
KMW0421	C8H8O3	Methyl salicylate	Ester	119-36-8	62488.9	57023.5	45952.9	18593.5	17932.4	17880.8	1.10651	0.0166569	0.32881	-1.60467	down
XMW1083	C10H20O2	7-Octene-2,6-diol, 2,6-dimethyl-	Alcohol	29210-77-3	7398.46	6225.87	8185.58	659762	593110	860163	1.12115	0.0129923	96.8842	6.59819	up
D359	C10H16N2	Pyrazine, 2,3-dimethyl-5-(1-methylpropyl)-	Heterocyclic compound	32263-00-6	64664	45944	50670	7497	7100	10762	1.1033	0.012321	0.157238	-2.66898	down
KMW0428	C10H16O	2-Cyclohexen-1-one, 3-methyl-6-(1-methylethyl)-	Terpenoids	89-81-6	2.01471e+07	1.42306e+07	1.6266e+07	9	9	9	1.12242	0.0104038	5.33137e-07	-20.839	down
KMW0429	C11H18O2	Isobornyl formate	Ester	1200-67-5	55114	35258	40914	16691.6	17144	20354.2	1.06146	0.0444727	0.412761	-1.27662	down
KMW0441	C10H12O2	Benzeneacetic acid, ethyl ester	Ester	101-97-3	9	9	9	1.02868e+06	1.04583e+06	1.12707e+06	1.12268	0.000807585	118577	16.8555	up
KMW0442	C9H12O	3-Phenylpropanol	Alcohol	122-97-4	74073.5	58341.9	59983	235292	238807	319323	1.10736	0.0158023	4.12385	2.04399	up
XMW0855	C6H10OS2	Ethanone, 1-(2-methyl-1,3-dithiolan-2-yl)-	Heterocyclic compound	33266-07-8	31150.2	27089.7	32932	167444	173058	105577	1.09633	0.0311228	4.89273	2.29064	up
KMW0413	C10H14O	(-)-Carvone	Terpenoids	6485-40-1	2.01471e+07	1.42219e+07	1.6266e+07	9	9	9	1.12242	0.0104332	5.33228e-07	-20.8387	down
XMW0776	C10H10O2	Benzoic acid, 2-propenyl ester	Ester	583-04-0	6.09089e+07	4.21714e+07	4.89473e+07	7875.61	16432.4	41406	1.11358	0.0114926	0.000432251	-11.1758	down
XMW0497	C6H4O2S	2,5-ThiophenedicarboxAldehyde	Heterocyclic compound	932-95-6	9	9	9	6710.47	5452.28	7095.7	1.12253	0.00593872	713.276	9.47832	up
D106	C10H10O2	1,1'-(1,4-phenylene)bis-Ethanone	Ketone	1009-61-6	78075.7	53066.2	161752	798697	722405	1.21727e+06	1.07226	0.0292731	9.34937	3.22487	up
XMW0472	C9H10O3	1,2-Ethanediol, monobenzoate	Ester	94-33-7	239499	150762	165550	44174.3	44391.6	70115.6	1.06219	0.031137	0.285495	-1.80846	down
KMW0563	C13H22O	5,9-Undecadien-2-one, 6,10-dimethyl-, (E)-	Ketone	3796-70-1	635421	549750	517542	3.10125e+06	2.71796e+06	4.31874e+06	1.1084	0.0276739	5.954	2.57386	up
XMW1455	C7H9NO2	5-Amino-2-methoxyphenol	Phenol	1687-53-2	244951	240627	157837	7792.2	7310.52	23148.6	1.08173	0.0166165	0.0594504	-4.07217	down
NMW0177	C8H9NO	N-Benzylformamide	Amine	6343-54-0	2.07023e+06	2.0542e+06	1.35241e+06	138929	135080	384916	1.06269	0.0133551	0.120311	-3.05516	down
D99	C10H13NO2	Benzoic acid, 2-(dimethylamino)-, methyl ester	Ester	10072-05-6	15774.6	17054.6	17701.8	3581.66	3586.39	4240.75	1.11829	0.000552317	0.225779	-2.14702	down
NMW0201	C11H15NO	Phenmetrazine	Heterocyclic compound	134-49-6	50264.8	34527.7	98966	483884	435264	689932	1.07608	0.0207995	8.75649	3.13035	up
D156	C13H18O2	Propanoic acid, 2-methyl-, 3-phenylpropyl ester	Ester	103-58-2	35182.4	32717.8	22637.1	9	9	9	1.12189	0.0157967	0.00029822	-11.7113	down
NMW0193	C8H10O2	Benzeneethanol, 4-hydroxy-	Alcohol	501-94-0	99335	80149.6	78740.8	543227	502971	861233	1.10553	0.0395433	7.38669	2.88493	up
XMW1356	C16H34	Dodecane, 2-methyl-6-propyl-	Hydrocarbons	55045-08-4	91330	66242.6	84943.4	405175	367692	602647	1.10104	0.0340912	5.67184	2.50382	up
D358	C12H22O2	4-tert-Butylcyclohexyl acetate	Ester	32210-23-4	56740.3	37360.2	42317	9	9	9	1.1219	0.0159569	0.000197922	-12.3028	down
XMW0303	C12H22O2	Hexanoic acid, 5-hexenyl ester	Ester	108058-81-7	1.97933e+06	1.34973e+06	1.44805e+06	37820.6	35978.5	61698.9	1.11388	0.0154686	0.028364	-5.13979	down
KMW0519	C8H8O3	Vanillin	Aldehyde	121-33-5	651324	665466	426032	261.36	362.301	1227.93	1.11119	0.0173969	0.00106241	-9.87845	down
KMW0558	C14H24O2	1,5-Dimethyl-1-vinyl-4-hexenyl butyrate	Ester	78-36-4	438439	455159	274325	42173.7	34699.1	38262.5	1.10967	0.0258411	0.0985812	-3.34254	down
XMW0979	C15H24	(4R,4aS,6S)-4,4a-Dimethyl-6-(prop-1-en-2-yl)-1,2,3,4,4a,5,6,7-octahydronaphthalene	Terpenoids	823810-22-6	811545	479411	575040	9	9	9	1.12196	0.0242735	1.44695e-05	-16.0766	down
NMW0160	C7H6O4	Benzoic Acid, 2,3-dihydroxy-	Acid	303-38-8	1.85682e+06	1.28282e+06	1.36332e+06	51513.7	41782.3	78096.1	1.11157	0.0148297	0.0380621	-4.7155	down
KMW0525	C10H20O2	n-Decanoic Acid	Acid	334-48-5	28560	19220	19812	9	9	9	1.12175	0.0175045	0.000399456	-11.2897	down
NMW0162	C10H18O2	8-Methyl-6-nonenoic Acid	Acid	21382-25-2	7.5496e+06	5.14995e+06	5.50861e+06	28576.5	27412.4	53322.8	1.11664	0.0149906	0.00600344	-7.37999	down
KMW0552	C15H24	(-)-.beta.-Bourbonene	Terpenoids	5208-59-3	1.80227e+06	1.24142e+06	1.29107e+06	357473	312554	447811	1.09037	0.0225016	0.257878	-1.95524	down
XMW0159	C16H34	2,6,10-Trimethyltridecane	Hydrocarbons	3891-99-4	92232.2	80574.6	75640.5	479215	419958	674156	1.10895	0.0285014	6.33265	2.66281	up
KMW0573	C15H24	(E)-.beta.-Famesene	Terpenoids	18794-84-8	445648	287647	844439	3.67088e+06	3.32167e+06	5.45003e+06	1.06914	0.0257456	7.88636	2.97936	up
w21	C10H14O2	2H-Pyran-2-one, 6-pentyl-	Heterocyclic compound	27593-23-3	69885.3	61986	60377.5	334634	292406	465452	1.10859	0.0285065	5.68269	2.50657	up
NMW0208	C9H16O3	9-Oxononanoic Acid	Acid	2553-17-5	14152	13676.7	13504.7	105976	102470	139314	1.11857	0.0129382	8.4135	3.07271	up
KMW0620	C15H22	Benzene, 1-(1,5-dimethyl-4-hexenyl)-4-methyl-	Terpenoids	644-30-4	1.23231e+07	9.75504e+06	1.101e+07	3.50558e+07	3.05148e+07	5.16674e+07	1.08503	0.0470549	3.5432	1.82505	up
XMW0974	C15H24	1,2,4-Methenoazulene, decahydro-1,5,5,8a-tetramethyl-, [1S-(1.alpha.,2.alpha.,3a.beta.,4.alpha.,8a.beta.,9R*)]-	Terpenoids	1137-12-8	12325.3	9476.32	9829.88	61324.8	62727.7	71491.1	1.11778	0.00186865	6.18193	2.62806	up
D102	C11H14O	1-Pentanone, 1-phenyl-	Ketone	1009-14-9	32392.5	24705.9	21813.5	87167.9	81746.8	94308.6	1.1022	0.000244371	3.33566	1.73797	up
NMW0163	C8H10O2	p-Hydroxyphenyl methyl carbinol	Alcohol	2380-91-8	2723.78	5865.06	2035.85	306325	290813	399033	1.11105	0.0103418	93.76	6.5509	up
NMW0165	C7H8O2	Orcinol	Phenol	504-15-4	32710	22509.5	25975	843.137	1081.43	1077	1.11827	0.0128989	0.0369676	-4.75759	down
NMW0164	C10H10O2	Benzene, 1,2-(methylenedioxy)-4-propenyl-, (E)-	Aromatics	4043-71-4	4638.3	4199.43	4005.75	11489.5	9816.97	13996.5	1.09818	0.0231519	2.74871	1.45875	up
KMW0522	C15H24	Copaene	Terpenoids	3856-25-5	38621.2	31677.7	26604.4	77263	66559.6	101101	1.06215	0.0297723	2.5275	1.33771	up
D175	C12H18O	.beta.-Phenylethylmethylethylcarbinol	Alcohol	10415-87-9	1.63426e+06	1.13171e+06	1.16166e+06	3.00335e+07	2.77921e+07	3.34283e+07	1.11987	0.00291703	23.2338	4.53815	up
NMW0180	C6H6N2O	Niacinamide	Amine	98-92-0	97298.9	91081.8	63451.7	27700.6	26109.7	26715.4	1.09099	0.0314042	0.319759	-1.64494	down
KMW0589	C15H24	Humulene	Terpenoids	6753-98-6	1.41356e+06	957673	2.67922e+06	1.15084e+07	1.04208e+07	1.73666e+07	1.0707	0.0283902	7.78065	2.95989	up
XMW0099	C13H28	Decane, 2,3,5-trimethyl-	Hydrocarbons	62238-11-3	46361.6	49026	30789	9	9	9	1.12193	0.0178052	0.000213986	-12.1902	down
XMW1182	C15H24	Di-epi-.alpha.-cedrene-(I)	Terpenoids	21996-77-0	2.26879e+06	1.58811e+06	1.51022e+06	3.83133e+06	3.49354e+06	4.80489e+06	1.05122	0.0128999	2.26001	1.17633	up
XMW0372	C15H32	Tridecane, 4,8-dimethyl-	Hydrocarbons	55030-62-1	115026	78700.9	82451.7	2.18187e+06	1.9837e+06	2.43033e+06	1.11978	0.00352213	23.8827	4.5779	up
XMW1331	C10H12O2	2-Propanone, 1-(4-methoxyphenyl)-	Ketone	122-84-9	5.72775e+06	3.91758e+06	4.15195e+06	120215	111885	220084	1.11008	0.0156568	0.0327734	-4.93133	down
NMW0169	C6H6O3	1,2,3-Benzenetriol	Phenol	87-66-1	96957.9	64664.2	70083.1	8448.07	7138.17	9386.41	1.11124	0.0199888	0.107778	-3.21387	down
KMW0526	C13H18O	2-Buten-1-one, 1-(2,6,6-trimethyl-1,3-cyclohexadien-1-yl)-, (E)-	Terpenoids	23726-93-4	1.82303e+07	1.2564e+07	1.34528e+07	192385	188888	269040	1.1185	0.0143282	0.0146973	-6.08831	down
XMW1097	C12H22O2	Hexanoic acid, 3-hexenyl ester	Ester	84434-19-5	290757	203608	214512	67983.4	63314.6	81046.5	1.09329	0.0229874	0.299551	-1.73913	down
XMW0618	C12H22O2	Ethyl 9-decenoate	Ester	67233-91-4	2999.58	1914.39	1739.41	8552.56	8078.89	9687.38	1.09139	0.000539461	3.95571	1.98394	up
WMW0089	C13H22O	5,9-Undecadien-2-one, 6,10-dimethyl-	Ketone	689-67-8	636449	550151	517831	3.10125e+06	2.71796e+06	4.31874e+06	1.10836	0.0276778	5.948	2.5724	up
KMW0572	C9H8O2	trans-Cinnamic Acid	Acid	140-10-3	85925.7	71168.8	67744.9	349787	310095	493688	1.10413	0.0299057	5.13064	2.35914	up
XMW0423	C13H22O	6,8-Nonadien-2-one, 8-methyl-5-(1-methylethyl)-, (E)-	Ketone	54868-48-3	5.63208e+06	3.87809e+06	4.17037e+06	166051	156673	261266	1.11265	0.0148227	0.0426877	-4.55004	down
NMW0171	C8H8O3	Acetic Acid, phenoxy-	Acid	122-59-8	93050.2	68240	77386.8	409349	355225	586759	1.10246	0.0325847	5.66176	2.50125	up
XMW1098	C12H24O2	Butanoic acid, octyl ester	Ester	110-39-4	9	9	9	135419	133920	119870	1.12259	0.00145407	14415.2	13.8153	up
XMW0825	C15H24	Bicyclo[3.1.1]heptane, 6-methyl-2-methylene-6-(4-methyl-3-pentenyl)-, [1R-(1.alpha.,5.alpha.,6.beta.)]-	Terpenoids	55123-21-2	211243	174512	173198	967941	840357	1.3224e+06	1.10784	0.0264066	5.60101	2.48569	up
XMW0019	C8H8O2	Acetophenone, 4'-hydroxy-	Ketone	99-93-4	163533	110999	313647	1.45469e+06	1.3075e+06	2.15799e+06	1.07373	0.0264374	8.3651	3.06438	up
XMW0980	C15H24	(1R,3aR,4aR,8aR)-1,4,4,6-Tetramethyl-1,2,3,3a,4,4a,7,8-octahydrocyclopenta[1,4]cyclobuta[1,2]benzene	Terpenoids	94482-89-0	666274	557618	510384	2.94087e+06	2.54708e+06	4.162e+06	1.10395	0.0313425	5.56426	2.47619	up
XMW1077	C7H14O4	1,3-Dioxolane-2,2-diethanol	Alcohol	5694-95-1	214224	171167	151872	24594.8	23184.2	75192	1.00546	0.00544263	0.228884	-2.12731	down
XMW0197	C15H24	(1S,4S,4aS)-1-Isopropyl-4,7-dimethyl-1,2,3,4,4a,5-hexahydronaphthalene	Terpenoids	267665-20-3	888756	558769	1.29085e+06	4.46674e+06	3.99874e+06	7.14622e+06	1.06479	0.0430841	5.70108	2.51124	up
XMW0552	C13H16O2	2,2'-Isopropylidenebis(5-methylfuran)	Heterocyclic compound	59212-75-8	82035	61325.1	155736	807508	714005	1.22444e+06	1.08151	0.031586	9.18083	3.19862	up
D204	C13H26O2	Pentyl octanoate	Ester	638-25-5	116053	67229.4	103041	398672	348669	648782	1.07272	0.0544094	4.87604	2.28571	up
KMW0603	C15H24	Germacrene D	Terpenoids	23986-74-5	3.98536e+06	2.41806e+06	3.09622e+06	7.28933e+06	6.67859e+06	1.15666e+07	1.02617	0.0636331	2.68794	1.4265	up
XMW0461	C12H20O2	cis-3-Hexenyl cis-3-hexenoate	Ester	61444-38-0	286253	198461	214239	66733.1	63258	79457.5	1.09409	0.0233265	0.299661	-1.7386	down
XMW0182	C15H24	(3S,3aS,6R,8aS)-3,8,8-Trimethyl-7-methyleneoctahydro-1H-3a,6-methanoazulene	Terpenoids	31145-21-8	557379	371279	352396	12588.4	11954.8	5499.66	1.10856	0.0236174	0.0234517	-5.41417	down
XMW0964	C15H24	Petasitene	Terpenoids	443124-67-2	2195.09	618.983	2071.6	652119	701386	763917	1.11377	0.00209922	433.394	8.75954	up
D341	C15H24	Naphthalene, decahydro-1,6-bis(methylene)-4-(1-methylethyl)-, (4.alpha.,4a.alpha.,8a.alpha.)-	Terpenoids	30021-46-6	445847	303289	803319	3.32292e+06	3.00155e+06	5.01238e+06	1.0716	0.0291162	7.30253	2.8684	up
KMW0478	C15H24	cis-.beta.-Farnesene	Terpenoids	28973-97-9	162338	145402	129397	830021	731329	1.15787e+06	1.10879	0.0269937	6.22053	2.63704	up
D436	C10H12O3	Methyl p-tolyloxyacetate	Ester	38768-63-7	1944.94	741.853	1207.94	35013.7	33540.5	23670.2	1.10439	0.0136509	23.6793	4.56555	up
NMW0158	C7H7NO3	Benzene, 1-methoxy-2-nitro-	Aromatics	91-23-6	362312	218866	228289	46691.4	46953.3	47351.5	1.10157	0.0406053	0.174184	-2.52132	down
D445	C11H16O3	Furfuryl hexanoate	Ester	39252-02-3	998063	680325	739631	36853.2	33834.6	56545.4	1.11136	0.0155329	0.0526188	-4.24828	down
XMW0738	C8H9NO2	Benzoic acid, 4-amino-, methyl ester	Ester	619-45-4	75153.5	69179.6	64014.9	12959.9	11968.8	21196.2	1.0898	0.000253517	0.221384	-2.17538	down
WMW0217	C12H22O	2-Octenal, 2-butyl-	Alcohol	13019-16-4	4.68639e+06	3.26784e+06	3.4881e+06	639890	586178	736351	1.10888	0.0180997	0.171505	-2.54368	down
XMW1172	C9H8O3	3,6-Dimethyl-4H-furo[3,2-c]pyran-4-one	Heterocyclic compound	36745-38-7	5387.59	5460.04	5157.34	64037.6	56861.2	69425	1.1217	0.00388104	11.8915	3.57186	up
KMW0532	C12H24O2	Hexanoic acid, hexyl ester	Ester	6378-65-0	192529	134043	127537	640929	588650	743145	1.10359	0.0027394	4.34417	2.11908	up
XMW0195	C15H26	1H-Cycloprop[e]azulene, decahydro-1,1,4,7-tetramethyl-, [1aR-(1a.alpha.,4.beta.,4a.beta.,7.beta.,7a.beta.,7b.alpha.)]-	Terpenoids	28580-43-0	2.19914e+06	1.53919e+06	1.61924e+06	19794.3	18437.3	31991.8	1.11667	0.0136052	0.0131073	-6.25348	down
XMW1222	C7H6Cl2O3	2,4-Dioxabicyclo[3.2.0]hept-6-en-3-one, 1,5-dichloro-6,7-dimethyl-	Ketone	35436-20-5	100879	69810.5	74622.8	4992.34	3729.02	5092.91	1.11516	0.015144	0.056313	-4.15039	down
NMW0166	C12H10	Biphenyl	Aromatics	92-52-4	611824	417196	450037	7332.9	7039.6	12798.5	1.11451	0.0150296	0.0183705	-5.76647	down
KMW0530	C12H20O2	Geranyl acetate	Terpenoids	105-87-3	1.82276e+07	1.25639e+07	1.34473e+07	193868	192440	276282	1.11833	0.014336	0.0149776	-6.06105	down
XMW0781	C8H7NO4	2-Nitrophenyl acetate	Ester	610-69-5	155487	107201	112199	11633.3	10958.8	12872.6	1.11496	0.0177617	0.0946011	-3.402	down
NMW0168	C10H18O4	Diethyl adipate	Ester	141-28-6	177243	121551	128812	23019.1	22966.4	22009.7	1.1122	0.0205788	0.159014	-2.65278	down
XMW0262	C15H22	1,1,7,7a-Tetramethyl-1a,2,6,7,7a,7b-hexahydro-1H-cyclopropa[a]naphthalene	Terpenoids	154098-14-3	30029.4	19360.5	18999.1	9	9	9	1.12148	0.0242943	0.0003948	-11.3066	down
XMW1412	C15H24	1H-3a,7-Methanoazulene, 2,3,4,7,8,8a-hexahydro-3,6,8,8-tetramethyl-, (3R,3aS,7S,8aR)-	Terpenoids	65354-33-8	2.26601e+06	1.58411e+06	1.50904e+06	3.80436e+06	3.46866e+06	4.76111e+06	1.05047	0.0127051	2.24553	1.16705	up
XMW0856	C10H12O2	1-Butanone, 2-hydroxy-1-phenyl-	Ketone	16183-46-3	150938	119303	120563	482693	420678	686527	1.09477	0.0361937	4.06827	2.02442	up
XMW0962	C12H16O2	Butanoic acid, 2-methyl-, phenylmethyl ester	Ester	56423-40-6	15392.9	35941.1	18451.2	407404	408821	502462	1.1042	0.00430808	18.8964	4.24004	up
XMW0701	C10H12N2	1H-Pyrrolo[2,3-b]pyridine, 2-(1-methylethyl)-	Heterocyclic compound	27257-18-7	6050.22	3960.61	3866.93	10492.4	10705.6	16202.7	1.0432	0.0389034	2.69501	1.43029	up
XMW0728	C12H16O	Benzenemethanol, 4-methyl-.alpha.-(1-methyl-2-propenyl)-, (R*,R*)-	Alcohol	83173-76-6	57669.6	41446.8	43223.4	204136	176845	313795	1.0901	0.0460892	4.88112	2.28721	up
D283	C13H20O	2-Buten-1-one, 1-(2,6,6-trimethyl-2-cyclohexen-1-yl)-, (E)-	Ketone	24720-09-0	97331.1	83580.8	75595.2	526053	468065	694907	1.11215	0.0189811	6.58471	2.71912	up
WMW0010	C15H24	beta-Elemen	Terpenoids	515-13-9	1.78631e+06	1.2272e+06	1.2756e+06	371429	350346	482674	1.08775	0.0241809	0.280816	-1.83231	down
XMW1408	C15H24	1H-Cyclopropa[a]naphthalene, 1a,2,3,3a,4,5,6,7b-octahydro-1,1,3a,7-tetramethyl-, [1aR-(1a.alpha.,3a.alpha.,7b.alpha.)]-	Terpenoids	489-29-2	67232.2	52097.3	55073.7	260045	253934	748704	1.04719	0.157248	7.24002	2.85599	up
XMW0743	C15H24	(-)-Aristolene	Terpenoids	6831-16-9	246643	210782	202244	1.26806e+06	1.13121e+06	1.83849e+06	1.10804	0.0310055	6.42407	2.68349	up
XMW1101	C14H22	Benzene, 1,4-dimethyl-2,5-bis(1-methylethyl)-	Aromatics	10375-96-9	19187.3	14457.2	16125.6	69363.2	68102.2	198691	1.04258	0.158273	6.75419	2.75578	up
XMW0379	C15H24	Bicyclo[5.2.0]nonane, 2-methylene-4,8,8-trimethyl-4-vinyl-	Terpenoids	242794-76-9	57766.1	40608.3	42037.6	130269	139428	149040	1.0997	0.000274999	2.9822	1.57638	up
KMW0544	C11H14O2	Methyleugenol	Phenol	93-15-2	4721.09	1602.8	3510.3	22277.4	22930.1	15234.9	1.05562	0.0125124	6.14615	2.61968	up
XMW0805	C10H10S	Benzo[b]thiophene, 2-ethyl-	Heterocyclic compound	1196-81-2	32761	27569.9	23470.3	908.236	1008.56	3340.85	1.07605	0.00658634	0.0627395	-3.99448	down
KMW0548	C15H24	[1aR-(1a.alpha.,4.alpha.,4a.beta.,7b.alpha.)]-1a,2,3,4,4a,5,6,7b-octahydro-1,1,4,7-tetramethyl-1H-Cycloprop[e]azulene	Terpenoids	489-40-7	269914	226149	176740	7219.87	6035.13	24912.7	1.07263	0.0125023	0.0567295	-4.13976	down
w39	C13H22O	2-Butanone, 4-(2,6,6-trimethyl-2-cyclohexen-1-yl)-	Ketone	31499-72-6	23480.9	17694.7	18437.6	95718.2	99601.3	119602	1.11415	0.0052175	5.28275	2.40129	up
KMW0559	C15H24	Bicyclo[7.2.0]undec-4-ene, 4,11,11-trimethyl-8-methylene-,[1R-(1R*,4Z,9S*)]-	Terpenoids	118-65-0	9	9	9	352397	379319	349545	1.12262	0.000691918	40046.7	15.2894	up
KMW0560	C9H6O2	Coumarin	Heterocyclic compound	91-64-5	28838.1	17626.2	17890.1	9	9	9	1.12129	0.0284208	0.000419552	-11.2189	down
XMW0797	C15H24	Naphthalene, 1,2,4a,5,6,8a-hexahydro-4,7-dimethyl-1-(1-methylethyl)-,[1R-(1.alpha.,4a.alpha.,8a.alpha.)]-	Terpenoids	17627-24-6	1.05465e+06	644150	673823	9	9	9	1.12197	0.0268092	1.13798e-05	-16.4232	down
NMW0190	C12H23N	CyclohexanAmine, N-cyclohexyl-	Amine	101-83-7	984.855	924.416	870.377	2055.75	2006.02	3189.68	1.06828	0.0601418	2.60876	1.38337	up
D154	C12H16O2	.beta.-Phenylethyl butyrate	Ester	103-52-6	13607.3	8244.59	9506.65	1554.83	2550.33	4450.18	1.00317	0.0249125	0.272823	-1.87396	down
D353	C15H24	(S,1Z,6Z)-8-Isopropyl-1-methyl-5-methylenecyclodeca-1,6-diene	Terpenoids	317819-80-0	626576	522677	499708	2.90282e+06	2.52385e+06	4.03989e+06	1.10681	0.028468	5.74093	2.52128	up
XMW1260	C13H24O	1-Cyclohexene-1-propanol, .alpha.,2,6,6-tetramethyl-	Alcohol	3293-47-8	13367.1	9368.74	9788.67	38308.1	33863.7	55404.5	1.08598	0.0362617	3.92247	1.97176	up
XMW0160	C13H18O	Megastigmatrienone	Ketone	38818-55-2	4851.61	3571.42	3463.71	9	9	9	1.12163	0.0124773	0.00227144	-8.78218	down
XMW0198	C13H22O	3-Buten-2-ol, 4-(2,6,6-trimethyl-2-cyclohexen-1-yl)-, (3E)-	Alcohol	25312-34-9	176241	134386	282363	1.04926e+06	954676	1.58249e+06	1.07881	0.031135	6.04804	2.59647	up
KMW0566	C15H24	(4aR-trans)-decahydro-4a-methyl-1-methylene-7-(1-methylethylidene)-Naphthalene	Terpenoids	515-17-3	3.74334e+06	3.50317e+06	3.29434e+06	2.68692e+07	2.62647e+07	3.61513e+07	1.11763	0.0144186	8.4704	3.08243	up
WMW0095	C13H24O	5,9-Undecadien-2-ol, 6,10-dimethyl-	Alcohol	53837-34-6	208871	168011	366827	1.40135e+06	1.25904e+06	2.12472e+06	1.07692	0.032126	6.43411	2.68574	up
XMW0948	C15H24	Valerena-4,7(11)-diene	Terpenoids	351222-66-7	392858	257928	553476	1.8536e+06	1.67211e+06	2.89776e+06	1.06863	0.0394095	5.33394	2.4152	up
WMW0207	C15H30	Cyclohexane, 1-(1,5-dimethylhexyl)-4-methyl-	Hydrocarbons	29799-19-7	27435	24729.7	32841.7	65434.4	61709.9	96025	1.06509	0.0458235	2.62532	1.39249	up
XMW0045	C15H24	(1R,4R,4aS,8aR)-4,7-Dimethyl-1-(prop-1-en-2-yl)-1,2,3,4,4a,5,6,8a-octahydronaphthalene	Terpenoids	92692-39-2	352395	229938	569773	2.15651e+06	1.93554e+06	3.31841e+06	1.06919	0.0341444	6.4321	2.68529	up
WMW0148	C15H24	Spiro[4.5]dec-7-ene, 1,8-dimethyl-4-(1-methylethenyl)-, [1S-(1.alpha.,4.beta.,5.alpha.)]-	Terpenoids	24048-44-0	497708	299478	361408	9	9	9	1.12196	0.022223	2.33041e-05	-15.3891	down
XMW0549	C15H24	(1S,4aR,7R)-1,4a-Dimethyl-7-(prop-1-en-2-yl)-1,2,3,4,4a,5,6,7-octahydronaphthalene	Terpenoids	52026-55-8	20022	15783.7	16331.8	97098.3	88200	148940	1.10424	0.0376727	6.41071	2.68048	up
KMW0576	C15H24	Aromandendrene	Terpenoids	489-39-4	100714	60527.5	64918.4	9	9	9	1.12162	0.0273444	0.000119384	-13.0321	down
XMW0987	C15H22	Eudesma-2,4,11-triene	Terpenoids	82462-31-5	2.25787e+06	2.21837e+06	1.95361e+06	5.50803e+06	5.06153e+06	6.47045e+06	1.10718	0.0104815	2.65014	1.40607	up
KMW0585	C14H26O2	Citronellyl isobutyrate	Ester	97-89-2	984042	770323	839661	4.02997e+06	3.85015e+06	5.68296e+06	1.10801	0.0234327	5.22858	2.38642	up
XMW1405	C12H10	1,8-Ethylenenaphthalene	Aromatics	83-32-9	1957.91	1264.6	1242.28	9	9	9	1.12019	0.0243031	0.00604733	-7.36949	down
XMW0742	C15H24	10,10-Dimethyl-2,6-dimethylenebicyclo[7.2.0]undecane	Terpenoids	357414-37-0	352130	215348	231889	7355.45	7542.49	49258.2	1.02307	0.0212149	0.0802587	-3.6392	down
XMW0992	C15H22	(2R,8R,8aS)-8,8a-Dimethyl-2-(prop-1-en-2-yl)-1,2,3,7,8,8a-hexahydronaphthalene	Terpenoids	5090-61-9	351793	229966	569773	2.15489e+06	1.93458e+06	3.31841e+06	1.06916	0.0342387	6.43306	2.68551	up
KMW0674	C12H24O	trans-2-Dodecen-1-ol	Alcohol	69064-37-5	84884.2	66242.6	84943.4	405175	367692	601113	1.10335	0.033709	5.82021	2.54107	up
KMW0483	C11H22O	Undecanal	Aldehyde	112-44-7	14262.2	11722.6	6524.56	191023	192158	305286	1.10565	0.0283826	21.1775	4.40446	up
D294	C10H16O	2-Cyclopenten-1-one, 2-pentyl-	Ketone	25564-22-1	41618.8	24238.5	28149	263161	263540	368074	1.10821	0.0150313	9.51824	3.25069	up
KMW0481	C11H22O2	Acetic acid, nonyl ester	Ester	143-13-5	9	9	9	36275.5	38373.5	45161.9	1.1226	0.00448083	4437.44	12.1155	up
NMW0143	C10H15N	BenzenAmine, 2,6-diethyl-	Amine	579-66-8	603588	823402	409162	22354.2	25253.6	65949.8	1.08094	0.0391627	0.0618455	-4.01519	down
XMW1463	C12H20O3	2-Oxabicyclo[2.2.2]octan-6-ol, 1,3,3-trimethyl-, acetate	Ester	57709-95-2	41104.2	42109	35967.2	226780	218707	234975	1.12084	0.000117533	5.70951	2.51337	up
XMW0731	C11H16	Benzene, pentamethyl-	Aromatics	700-12-9	417922	413489	370459	9	9	9	1.12261	0.00142448	2.2465e-05	-15.442	down
NMW0129	C12H20O2	Cyclohexanol, 1-methyl-4-(1-methylethenyl)-, acetate	Ester	10198-23-9	211457	133292	122087	725286	726917	820734	1.09922	0.00015314	4.86882	2.28357	up
KMW0482	C10H16O	2,4-Decadienal, (E,E)-	Aldehyde	25152-84-5	31156.4	20412.8	18974.2	103779	114472	137898	1.09975	0.00546148	5.04865	2.3359	up
D74	C9H10O2	4-Acetylanisole	Ketone	100-06-1	17943.7	12291.6	15861.8	136088	132912	126405	1.11736	2.89156e-05	8.57765	3.10058	up
XMW0422	C14H30	3,5-Dimethyldodecane	Hydrocarbons	107770-99-0	1523.05	1053.23	1091.17	4.91808e+06	4.79299e+06	6.45568e+06	1.12236	0.00970277	4408.16	12.106	up
XMW0047	C10H14O	Phenol, 2-(1-methylpropyl)-	Phenol	89-72-5	235901	124346	156495	1.14875e+07	1.12339e+07	1.76339e+07	1.11733	0.0239137	78.0959	6.28717	up
XMW0961	C12H20O2	Bornyl acetate	Terpenoids	76-49-3	9	9	9	1.91164e+07	1.86739e+07	2.76374e+07	1.12261	0.0174216	2.42325e+06	21.2085	up
D266	C13H26	1-Tridecene	Hydrocarbons	2437-56-1	30763.5	19279.8	20454.4	659498	653271	955780	1.11707	0.0179497	32.179	5.00805	up
XMW0615	C10H14O	Phenol, m-tert-butyl-	Phenol	585-34-2	52414	27570.6	31055.5	2.2281e+06	2.13916e+06	2.91783e+06	1.11782	0.010366	65.6077	6.03579	up
D415	C11H14O2	Isobutyric acid, 2-methylphenyl ester	Ester	36438-54-7	9	9	9	4.72409e+06	4.62568e+06	6.79396e+06	1.12259	0.0168237	597916	19.1896	up
XMW0025	C9H10O2	Paroxypropione	Ketone	70-70-2	3.74397e+06	2.35053e+06	2.24705e+06	7.24791e+06	7.22807e+06	8.19749e+06	1.06998	0.0021188	2.71814	1.44262	up
XMW1131	C8H10O3	2,5-Furandione, 3-methyl-4-propyl-	Heterocyclic compound	16493-20-2	61966.1	88416	39213.9	979.68	1248.28	1017.35	1.11476	0.048591	0.017117	-5.86843	down
KMW0515	C12H22O2	6-Octen-1-ol, 3,7-dimethyl-, acetate	Ester	150-84-5	61823	45771.3	35619.9	111274	108830	123281	1.05765	0.00372561	2.3977	1.26165	up
KMW0557	C9H10O3	Benzoic acid, 2-hydroxy-, ethyl ester	Ester	118-61-6	9	9	9	28729.9	26556.3	31500.1	1.12268	0.0024382	3214.31	11.6503	up
NMW0124	C10H16O2	2-Cyclohexen-1-one, 2-hydroxy-3-methyl-6-(1-methylethyl)-	Terpenoids	490-03-9	9	9	9	2801	2935	1524	1.11897	0.0330689	268.889	8.07087	up
KMW0491	C9H10O2	Hydrocinnamic Acid	Acid	501-52-0	534924	467192	351313	1.74228e+06	1.79062e+06	2.52445e+06	1.09596	0.0212244	4.47556	2.16207	up
KMW0490	C9H16O2	trans-3-Methyl-4-octanolide	Ester	39638-67-0	11642.1	9622	8362.98	508197	520134	545900	1.12172	0.000428058	53.1348	5.73159	up
XMW1102	C11H10O2	Vinyl trans-cinnamate	Ester	17719-70-9	204405	302919	406071	13848.1	14387.2	22070.9	1.10681	0.0383517	0.055076	-4.18243	down
XMW0956	C12H18O2	2-Cyclohexen-1-ol, 2-methyl-5-(1-methylethenyl)-, acetate, cis-	Ester	1205-42-1	137355	103292	104091	9	9	9	1.12225	0.00940644	7.83205e-05	-13.6402	down
KMW0518	C12H20O2	2,6-Octadien-1-ol, 3,7-dimethyl-, acetate, (Z)-	Ester	141-12-8	7.54903e+06	5.14931e+06	5.50811e+06	25776.9	27144.5	45770.8	1.11798	0.0149803	0.00542073	-7.5273	down
XMW1340	C7H6S2	Thieno[2,3-b]thiophene,2-methyl-	Heterocyclic compound	13393-75-4	31369.8	23712.3	24619.2	4211.58	4167.66	6093.26	1.10343	0.00858914	0.181584	-2.46129	down
XMW0693	C11H18O2	2,6-Octadienoic acid, 3,7-dimethyl-, methyl ester	Ester	2349-14-6	17763.7	10132.3	11131.5	732872	668558	884038	1.11889	0.00713252	58.5605	5.87186	up
XMW0722	C9H12O2	1-Cyclohexene-1-carboxAldehyde, 5,5-dimethyl-3-oxo-	Aldehyde	56621-35-3	9	9	9	1.97375e+06	1.93057e+06	2.85151e+06	1.12256	0.0172931	250216	17.9328	up
WMW0204	C12H18O2	Bicyclo[3.1.0]hexan-3-ol, 4-methylene-1-(1-methylethyl)-, acetate	Terpenoids	3536-54-7	88520.6	54551.9	66312.8	4.94074e+06	4.84976e+06	7.65149e+06	1.1189	0.0246483	83.3009	6.38026	up
XMW0803	C12H20O2	Iso-3-thujyl acetate	Ester	62181-90-2	276720	145468	163488	9.91517e+06	9.56685e+06	1.28762e+07	1.11741	0.00960041	55.2494	5.78789	up
NMW0125	C7H6O3	Salicylic Acid	Acid	69-72-7	4192.29	2215.69	2255.42	96451.2	98214.8	104232	1.11617	0.000256892	34.5012	5.10858	up
XMW0952	C12H24O2	4-Methylhexyl 3-methylbutanoate	Ester	1215127-80-2	9	9	9	63951	61762	87175.1	1.12249	0.0128784	7884.74	12.9448	up
KMW0493	C9H10O2	2-Methoxy-4-vinylphenol	Aromatics	7786-61-0	29793.5	52857	27123.2	146036	138322	217739	1.06653	0.0262813	4.57392	2.19343	up
XMW0081	C7H11NO3	L-Proline, 1-acetyl-	Acid	68-95-1	469287	317801	341229	8993.01	7179.88	11537.8	1.1161	0.016017	0.0245593	-5.34759	down
NMW0157	C8H9NO	Acetamide, N-phenyl-	Amine	103-84-4	5.67248e+06	3.87809e+06	4.20475e+06	150052	143677	245499	1.11234	0.0150694	0.0392014	-4.67295	down
D402	C10H14O2	Piperitenone oxide	Ketone	35178-55-3	278458	195575	212488	9	9	9	1.12221	0.0119899	3.93287e-05	-14.6341	down
KMW0717	C8H14O6	(+)-Diethyl L-tartrate	Ester	87-91-2	10482	8978.08	8037.62	1.87595e+06	2.01259e+06	3.41001e+06	1.12023	0.0385517	265.424	8.05216	up
XMW0294	C11H20O	10-Undecenal	Aldehyde	112-45-8	105577	49631	63050.7	3668678	3557847	4429615	1.11653	0.00499178	53.4052	5.73891	up
D457	C12H24O2	1-Hexanol, 5-methyl-2-(1-methylethyl)-, acetate	Ester	40853-55-2	4.02258e+06	2.8531e+06	3.11188e+06	11770.7	8841.48	10074.7	1.121	0.0112261	0.00307251	-8.34637	down
KMW0446	C10H16O	Citral	Terpenoids	5392-40-5	272212	285073	365833	23303.1	26676.5	37420.8	1.11135	0.0097104	0.0946795	-3.4008	down
NMW0136	C7H6O2	BenzAldehyde, 3-hydroxy-	Aldehyde	100-83-4	8112.59	6449.21	6695.01	28241.4	26367.1	33854.9	1.11283	0.00744177	4.16165	2.05716	up
XMW1433	C9H14O3	2,6-Heptanedione, 3-acetyl-	Ketone	29214-57-1	490586	352662	400760	10281.2	11449.2	17692.5	1.11488	0.00980037	0.0316902	-4.97982	down
NMW0104	C10H18O	2,6-Octadien-1-ol, 3,7-dimethyl-	Terpenoids	624-15-7	1.05905e+08	7.73522e+07	8.65229e+07	41637	33540.9	38739.5	1.12187	0.00865327	0.00042226	-11.2096	down
KMW0437	C10H12O2	Acetic acid, 2-phenylethyl ester	Ester	103-45-7	2.19083e+06	1.55903e+06	1.7209e+06	442343	521298	576597	1.09885	0.0170396	0.28154	-1.82859	down
NMW0105	C9H12O	Phenol, 4-propyl-	Phenol	645-56-7	7.01434e+07	4.89449e+07	5.67842e+07	178697	172974	315333	1.1184	0.0110384	0.00379254	-8.04262	down
XMW0764	C10H16O	(S)-(-)-(4-Isopropenyl-1-cyclohexenyl)methanol	Terpenoids	18457-55-1	5948.76	5082.03	3911.97	116791	112900	185086	1.11553	0.0295006	27.7577	4.79481	up
NMW0116	C12H21N	Memantine	Amine	19982-08-2	9	9	9	4.73907e+06	4.64355e+06	6.81837e+06	1.12258	0.0168291	600037	19.1947	up
KMW0473	C10H14O	4-Isopropylcyclohexa-1,3-dienecarbAldehyde	Aldehyde	1197-15-5	9	9	9	18691702	1.82895e+07	2.6366e+07	1.12262	0.0151354	2.34619e+06	21.1619	up
XMW1096	C12H22O2	Butanoic acid, 1-ethenylhexyl ester	Ester	16491-54-6	4067.33	2128.28	1826.53	53035.2	51322	83903.6	1.10629	0.0292144	23.4677	4.5526	up
NMW0123	C10H20O2	p-Menthane-3,8-diol, cis-1,3,trans-1,4-	Terpenoids	3564-98-5	69366.7	35662.3	41098.3	2.3621e+06	2.28165e+06	3.02636e+06	1.11715	0.00863629	52.4893	5.71395	up
D356	C8H10O2	3-Methoxy-5-methylphenol	Phenol	3209-13-0	6620.24	4509.62	3657.95	21130.9	22254.6	22032.5	1.09589	0.000869185	4.42378	2.14528	up
XMW0953	C11H14O2	Phenylacetic acid propyl ester	Ester	4606-15-9	14878.2	9429.11	5427.39	173260	190117	187256	1.10307	7.98292e-05	18.5181	4.21087	up
KMW0453	C12H20O2	Linalyl acetate	Terpenoids	115-95-7	624156379	4.50044e+08	5.13516e+08	82221.3	203539	543817	1.11101	0.0091229	0.000522498	-10.9023	down
KMW0456	C10H22O	1-Decanol	Alcohol	112-30-1	26758.3	29019	37412.3	9	9	9	1.12244	0.010717	0.000289732	-11.753	down
w02	C10H18O	2,4-Decadien-1-ol	Alcohol	14507-02-9	9	9	9	7.87687e+06	7.73754e+06	1.09156e+07	1.12262	0.0134711	982592	19.9062	up
NMW0108	C10H14O2	Bicyclo[2.2.1]heptane-2,5-dione, 1,7,7-trimethyl-	Terpenoids	4230-32-4	1.06086e+08	7.73909e+07	8.6685e+07	39758.5	41644.2	39634.7	1.12213	0.00870418	0.000448017	-11.1242	down
NMW0109	C7H8O2	1,2-Benzenediol, 3-methyl-	Alcohol	488-17-5	1.49259e+06	1.09855e+06	1.15247e+06	9	9	9	1.12236	0.00962973	7.21228e-06	-17.0811	down
XMW1468	C11H20O	(2,2,6-Trimethyl-bicyclo[4.1.0]hept-1-yl)-methanol	Alcohol	78996-11-9	5.92236e+07	4.19106e+07	4.74607e+07	9	9	9	1.12244	0.010452	1.81702e-07	-22.3919	down
XMW0643	C7H12N2O	Butyramide, 2-cyano-2-ethyl-	Amine	18705-38-9	9	9	9	5.59642e+07	5.46837e+07	7.97924e+07	1.12263	0.0161426	7.05334e+06	22.7499	up
NMW0120	C10H14O	Phenol, p-tert-butyl-	Phenol	98-54-4	52414	27570.6	31055.5	2.2281e+06	2.13916e+06	2.91783e+06	1.11782	0.010366	65.6077	6.03579	up
XMW0968	C10H14O	4,7,7-Trimethylbicyclo[4.1.0]hept-3-en-2-one	Ketone	81800-50-2	12652.5	9956.93	6319.94	149050	158043	227552	1.10888	0.020497	18.481	4.20797	up
XMW0783	C10H16O	1-Adamantanol	Alcohol	768-95-6	369430	523773	211573	9	9	9	1.12133	0.0550033	2.44393e-05	-15.3204	down
XMW1470	C10H16O	[1,1'-Bicyclopentyl]-2-one	Ketone	4884-24-6	113795	121782	154178	14161	13743	19441	1.1121	0.0102353	0.121474	-3.04128	down
WMW0069	C9H8O	2-Propenal, 3-phenyl-	Aldehyde	104-55-2	9	9	9	249243	253937	387140	1.12239	0.0224244	32974.8	15.0091	up
D139	C11H16O	Benzenepropanol, .alpha.,.alpha.-dimethyl-	Alcohol	103-05-9	9	9	9	891253	871226	1.20708e+06	1.1226	0.0118601	109984	16.7469	up
KMW0469	C9H12O2	Phenol, 4-ethyl-2-methoxy-	Phenol	2785-89-9	9	9	9	4.37451e+06	4.28743e+06	6.60937e+06	1.12254	0.0215655	565604	19.1094	up
NMW0122	C11H18O2	Geranyl formate	Ester	105-86-2	48853.6	25563.7	30645.1	1.73709e+06	1.67535e+06	2.23396e+06	1.11764	0.00895526	53.7434	5.74802	up
XMW0640	C15H24	Panaxene	Terpenoids	871660-95-6	13208	10667.6	7138.15	196791	197429	318706	1.11088	0.0301561	22.9874	4.52277	up
D390	C11H18O	Cyclopentanone, 2-(2-hexenyl)-	Ketone	34687-46-2	4014.76	4467.65	3137.95	9	9	9	1.12201	0.010047	0.00232351	-8.74948	down
XMW0036	C10H16O2	1,3-Cyclopentanedione, 4-(3-methylbutyl)-	Ketone	939-86-6	14507.9	20725.1	8789.22	1783.94	1182.39	1730.55	1.08687	0.062268	0.106693	-3.22846	down
XMW1061	C10H16S	Thiophene, 2-hexyl-	Heterocyclic compound	18794-77-9	9	9	9	1.43746e+06	1.40738e+06	2.05359e+06	1.12256	0.0162272	181423	17.469	up
XMW0448	C2H4N6	1,2,4,5-Tetrazine-3,6-diAmine	Heterocyclic compound	19617-90-4	9	9	9	1.29413e+06	1.27557e+06	1.88811e+06	1.12254	0.0178375	165104	17.333	up
D143	C10H12O2	Benzenepropanoic acid, methyl ester	Ester	103-25-3	9	9	9	3.35814e+06	3.57546e+06	6.33727e+06	1.1223	0.0439146	491514	18.9069	up
KMW0474	C11H22O	2-Undecanone	Ketone	112-12-9	11294.3	5794.36	8048.07	409900	392122	513749	1.11769	0.00759973	52.3445	5.70997	up
WMW0106	C11H20O2	6-Nonen-1-ol, acetate, (Z)-	Ester	76238-22-7	22056.4	19384	12796	405418	400481	648498	1.11304	0.0292951	26.8159	4.74502	up
XMW0424	C11H18O	2,6-Dimethyl-1-nonen-3-yn-5-ol	Alcohol	19780-98-4	453856	235669	292966	1.92581e+06	1.93925e+06	2.66521e+06	1.09675	0.0124747	6.64665	2.73263	up
NMW0114	C8H10O2	3-Methoxybenzyl Alcohol	Alcohol	6971-51-3	798.218	9	9	573079	562634	864273	1.07546	0.0213031	2450.31	11.2587	up
D184	C6H6O2	Hydroquinone	Phenol	123-31-9	9	9	9	938081	916938	1.36232e+06	1.12253	0.0178095	119161	16.8625	up
KMW0466	C10H18S	3-Cyclohexene-1-methanethiol, .alpha.,.alpha.,4-trimethyl-	Sulfur compounds	71159-90-5	22599.1	11476.1	15276.8	1.10732e+08	1.08656e+08	159482608	1.12176	0.0168604	7676.91	12.9063	up
KMW0467	C9H8O	(E)-CinnamAldehyde	Aldehyde	14371-10-9	92656.7	72351.4	74976.3	5366.87	5690.83	11667.3	1.09559	0.00424892	0.0946937	-3.40059	down
KMW0508	C10H14O	p-Cymen-7-ol	Alcohol	536-60-7	8804.39	7591.74	7227.97	295215	291692	468942	1.11906	0.0277089	44.6937	5.482	up
WMW0181	C11H20O2	4-Decenoic acid, methyl ester, Z-	Ester	7367-83-1	8028.77	10786.4	10751.3	261545	224598	182297	1.11714	0.011264	22.608	4.49876	up
D193	C10H16O	p-Mentha-1,8-dien-7-ol	Terpenoids	536-59-4	20647.3	20976.9	11209	1.47011e+07	1.44167e+07	2.28651e+07	1.12002	0.0246629	983.904	9.94237	up
XMW0682	C12H16O	Benzenemethanol, .alpha.-methyl-.alpha.-(1-methyl-2-propenyl)-	Alcohol	61967-11-1	62364.5	39574.3	44132.9	91735.2	93430.8	116167	1.03773	0.00822152	2.06291	1.04468	up
XMW0733	C10H16O2	7-Oxabicyclo[4.1.0]heptan-2-one, 3-methyl-6-(1-methylethyl)-	Terpenoids	5729-99-7	1.06043e+08	7.74035e+07	8.65701e+07	41637	40989.5	37353.5	1.12211	0.00869457	0.000444344	-11.136	down
D452	C10H14O2	Carvone oxide, trans-	Terpenoids	39903-97-4	2.18831e+07	1.54375e+07	1.78541e+07	139778	143323	393948	1.10768	0.0104248	0.012271	-6.3486	down
KMW0384	C8H9NO2	Benzene, (2-nitroethyl)-	Aromatics	6125-24-2	1825.36	2121.49	1320.15	39969.8	40643.9	44670.4	1.11817	0.00105454	23.7866	4.57208	up
XMW1459	C10H16S	Thiophene, 2-butyl-5-ethyl-	Heterocyclic compound	54411-06-2	9	9	9	708638	702440	1.04405e+06	1.12251	0.0184905	90930.8	16.4725	up
XMW1464	C11H16O	Benzene, (butoxymethyl)-	Ether	588-67-0	100694779	7.03572e+07	8.09415e+07	111846	122249	166070	1.12082	0.0110509	0.001588	-9.29857	down
D430	C7H9NOS	5-Acetyl-2,4-dimethylthiazole	Heterocyclic compound	38205-60-6	1.50175e+06	1.09496e+06	1.23421e+06	9	9	9	1.12238	0.00862396	7.0479e-06	-17.1144	down
XMW0109	C13H28	Dodecane, 4-methyl-	Hydrocarbons	6117-97-1	1.26754e+06	898275	1.01631e+06	1174.37	927.319	756.614	1.12126	0.0103922	0.000898239	-10.1206	down
XMW1444	C10H16O	Carvenone	Terpenoids	499-74-1	4.04893e+06	2.87946e+06	3.28402e+06	9	9	9	1.12238	0.00999471	2.64384e-06	-18.5289	down
XMW1320	C9H14O2	4-Isopropyl-1,3-cyclohexanedione	Ketone	62831-62-3	1.05832e+08	7.72992e+07	8.64979e+07	17982	17064.6	29061.9	1.12101	0.00864286	0.000237766	-12.0382	down
KMW0450	C8H10O2	Benzenemethanol, 4-methoxy-	Phenol	105-13-5	9	9	9	576768	564414	871782	1.12246	0.02169	74554.2	16.186	up
NMW0107	C9H7N	Isoquinoline	Heterocyclic compound	119-65-3	86694.2	62197	70652.1	4970.5	5191.06	6049.92	1.11746	0.010923	0.0738419	-3.75942	down
XMW1141	C7H7NO2	1H-Pyrrole-2,5-dione, 3-ethenyl-4-methyl-	Heterocyclic compound	21494-57-5	1.79019e+07	1.23781e+07	1.42657e+07	82714.6	82879.6	157176	1.11657	0.0118624	0.00724582	-7.10864	down
XMW0937	C12H18O2	(1R,5S,6R)-2,7,7-Trimethylbicyclo[3.1.1]hept-2-en-6-yl acetate	Ester	67999-48-8	1.51353e+07	1.0488e+07	1.21313e+07	28286.1	32110.2	56344.3	1.11824	0.0115549	0.0030921	-8.3372	down
WMW0025	C10H14O	Thymol	Terpenoids	89-83-8	9207.58	6295.03	7227.97	302466	291692	468942	1.11833	0.0262724	46.7696	5.5475	up
XMW0537	C9H10O	1H-Inden-5-ol, 2,3-dihydro-	Phenol	1470-94-6	5814.16	3489.55	4142.82	10737.5	10491.1	13181.6	1.06411	0.00368369	2.55905	1.35561	up
NMW0110	C6H6N2O	Picolinamide	Heterocyclic compound	1452-77-3	9.18883e+07	6.42077e+07	7.36882e+07	53196.9	47989.4	78009.6	1.12067	0.0110744	0.000779845	-10.3245	down
XMW0939	C12H20O2	4-Hexen-1-ol, 5-methyl-2-(1-methylethenyl)-, acetate	Ester	25905-14-0	1.05263e+08	7.66157e+07	8.60041e+07	9	9	9	1.12248	0.00879906	1.0079e-07	-23.2421	down
XMW1330	C13H28	Dodecane, 3-methyl-	Hydrocarbons	17312-57-1	9	9	9	4.71839e+06	4.73201e+06	6.23347e+06	1.12264	0.00912234	580884	19.1479	up
KMW0458	C12H20O2	p-Menth-8-en-3-ol, acetate	Ester	89-49-6	8.15723e+07	5.77034e+07	6.60696e+07	998526	1.07652e+06	2.03315e+06	1.11291	0.0105594	0.0200063	-5.6434	down
NMW0111	C11H17N	BenzeneethanAmine, N,.alpha.,.alpha.-trimethyl-	Amine	100-92-5	9	9	9	6.85331e+06	6.72182e+06	9.72182e+06	1.1226	0.0155185	862850	19.7187	up
NMW0112	C10H14O	Phenol, 2-(1,1-dimethylethyl)-	Phenol	88-18-6	3525.89	3333.65	4329.38	1.15966e+06	1.1759e+06	1.74443e+06	1.12134	0.0195116	364.645	8.51035	up
KMW0459	C10H16O	2,6-Octadienal, 3,7-dimethyl-, (E)-	Terpenoids	141-27-5	5.87477e+07	4.13916e+07	4.69919e+07	9	9	9	1.12244	0.0107	1.8351e-07	-22.3776	down
D422	C11H24O	Undecanol-5	Alcohol	37493-70-2	41724.5	21237	25168.4	2.60578e+07	2.55763e+07	3.98774e+07	1.12063	0.0228643	1038.37	10.0201	up
D333	C12H18O2	(+)-cis-Verbenol, acetate	Ester	29135-27-1	9	9	9	4.85603e+06	4.76779e+06	6.96454e+06	1.12259	0.0164461	614384	19.2288	up
XMW0364	C11H24O	6-Undecanol	Alcohol	23708-56-7	9	9	9	5.86374e+06	5.7344e+06	8.39808e+06	1.12259	0.016507	740601	19.4983	up
D299	C10H18O	Ethanol, 2-(3,3-dimethylcyclohexylidene)-, (Z)-	Alcohol	26532-23-0	1.05977e+08	7.74009e+07	8.6638e+07	9	9	9	1.12248	0.00863681	9.99942e-08	-23.2536	down
D222	C11H20O2	Hexanoic acid, 3-methyl-2-butenyl ester	Ester	76649-22-4	9	9	9	2.067e+06	2.02359e+06	2.91186e+06	1.12258	0.014999	259350	17.9845	up
XMW1391	C11H17N	Pyridine, 2-hexyl-	Heterocyclic compound	1129-69-7	9	9	9	3.31824e+07	3.24361e+07	4.69912e+07	1.12263	0.0155246	4.17073e+06	21.9919	up
XMW0108	C14H30	2,4-Dimethyldodecane	Hydrocarbons	6117-99-3	9	9	9	316557	314348	471394	1.12246	0.019436	40825.9	15.3172	up
XMW1147	C10H16O	Tricyclo[2.2.1.0(2,6)]heptane-3-methanol, 2,3-dimethyl-	Terpenoids	29550-55-8	9	9	9	1.1082e+08	1.08748e+08	1.5962e+08	1.12263	0.0168598	1.4044e+07	23.7434	up
XMW1063	C4H4N6	4,4'-Bitriazolyl	Heterocyclic compound	16227-15-9	9	9	9	9.9907e+06	9.78199e+06	1.46481e+07	1.12259	0.0186315	1.27484e+06	20.2819	up
NMW0117	C11H8	Benzene, 2,4-pentadiynyl-	Aromatics	41268-41-1	9	9	9	2.93789e+06	2.87034e+06	4.34303e+06	1.12255	0.0195379	375973	18.5203	up
XMW1244	C11H22O2	Hexanoic acid, pentyl ester	Ester	540-07-8	403.24	1021.8	586.129	974213	949301	1.29531e+06	1.11882	0.0106246	1600.47	10.6443	up
D170	C11H14O2	p-Tolyl isobutyrate	Ester	103-93-5	79557.7	42297.4	52604.8	974965	917407	1.42274e+06	1.11111	0.0220555	19.0022	4.24809	up
D163	C10H14O2	dl-Camphoroquinone	Terpenoids	10373-78-1	52206.8	40692.1	30892.7	134772	112080	173303	1.07201	0.0217805	3.39405	1.76301	up
KMW0472	C8H7N	Indole	Heterocyclic compound	120-72-9	105746	48916.6	61943.6	4.32248e+06	4.1396e+06	5.59988e+06	1.11642	0.00968324	64.9195	6.02058	up
XMW0546	C11H21N	(5R,8aR)-5-Propyloctahydroindolizine	Heterocyclic compound	120057-35-4	9	9	9	188795	180377	280245	1.12241	0.0211354	24052.5	14.5539	up
XMW0287	C11H14O2	Benzoic acid, 2-methylpropyl ester	Ester	120-50-3	9645.5	5597.92	4635.34	94921.9	96088.6	121486	1.10897	0.00646382	15.7201	3.97454	up
XMW1086	C11H22O2	Butanoic acid, heptyl ester	Ester	5870-93-9	26851.6	17933.9	16286.8	436592	435362	604245	1.11625	0.0136114	24.1713	4.59522	up
XMW0614	C11H22O2	Nonanoic acid, ethyl ester	Ester	123-29-5	1094.92	551.39	668.952	41069.7	39502.2	53455.1	1.11721	0.00987415	57.8884	5.8552	up
KMW0475	C10H16O	(2E,4Z)-2,4-Decadienal	Aldehyde	25152-83-4	55629	26744	33338	2198541	2127753	2727968	1.11709	0.00654746	60.9645	5.9299	up
WMW0077	C13H24	1-Tridecyne	Hydrocarbons	26186-02-7	69362.5	35660.2	41848.9	2.2106e+06	2.25204e+06	3.02923e+06	1.11679	0.0115259	51.0096	5.6727	up
NMW0121	C10H14O	Phenol, 2-methyl-5-(1-methylethyl)-	Terpenoids	499-75-2	65694.4	36966.8	26929.2	2.67526e+06	2.76182e+06	2.90965e+06	1.1152	0.000453846	64.4085	6.00918	up
XMW0772	C8H10O3	1,3-Cyclopentanedione, 2-acetyl-4-methyl-	Ketone	4056-69-3	7185.21	3934.24	4360.38	143664	138540	222376	1.11379	0.0264538	32.596	5.02662	up
D346	C11H16O2	Methyl 6,6-dimethylbicyclo[3.1.1]hept-2-ene-2-carboxylate	Ester	30649-97-9	9943.23	8549.01	6364.57	212719	192345	220145	1.11932	0.00149195	25.1524	4.65262	up
XMW0973	C9H13NO	Ketone, methyl 2,4,5-trimethylpyrrol-3-yl	Heterocyclic compound	19005-95-9	65803	41964	45715	285249	292748	305742	1.1106	1.99919e-05	5.75793	2.52555	up
D145	C11H14O2	Propanoic acid, 2-methyl-, phenylmethyl ester	Ester	103-28-6	4.89923e+06	2.29261e+06	2.84671e+06	1.71827e+08	165639638	2.16263e+08	1.1162	0.0075352	55.1603	5.78556	up
KMW0457	C8H9NO	Ethanone, 1-(2-aminophenyl)-	Ketone	551-93-9	4173.01	2375.86	2066.03	83471.9	86649.1	90545.6	1.11514	0.000195779	30.2577	4.91923	up
NMW0127	C10H18O2	6-Octenoic Acid, 3,7-dimethyl-	Acid	502-47-6	15143.6	11215.6	9853.17	308376	311403	478824	1.11665	0.0242947	30.3378	4.92304	up
XMW0580	C15H32	Dodecane, 2,6,10-trimethyl-	Hydrocarbons	3891-98-3	55700.7	37360.2	41858.3	9	9	9	1.12195	0.0147323	0.00020012	-12.2868	down
XMW0456	C12H20O	5,8-Decadien-2-one, 5,9-dimethyl-, (E)-	Ketone	130876-99-2	19967.8	15281.2	11982.8	135837	136004	162529	1.11274	0.00294284	9.19655	3.20109	up
XMW0209	C10H16O	1,4-Cyclohexadiene-1-methanol, 4-(1-methylethyl)-	Alcohol	22539-72-6	1873.54	1034.94	592.185	9	9	9	1.11084	0.0911338	0.0077128	-7.01853	down
XMW1323	C9H8O2	2(3H)-Benzofuranone, 3-methyl-	Heterocyclic compound	32267-71-3	9	9	9	7605.03	8657	8480.56	1.12256	0.0015551	916.392	9.83982	up
NMW0141	C10H18O2	2,7-Octadiene-1,6-diol, 2,6-dimethyl-, (E)-	Terpenoids	75991-61-6	3490531	4868742	1987266	8057	8428	5623	1.11794	0.0537836	0.00213675	-8.87036	down
XMW0954	C10H16O2	Cyclopropanecarboxylic Acid, 2,2-dimethyl-3-(2-methyl-1-propenyl)-, (1R-trans)-	Terpenoids	4638-92-0	9	9	9	2.18529e+06	2.14273e+06	3.15891e+06	1.12256	0.0172271	277294	18.0811	up
D361	C12H20O2	Ethyl geranate	Ester	32659-21-5	309499	316499	208185	578177	573547	898120	1.02614	0.0522292	2.45731	1.29708	up
KMW0516	C12H20O2	.alpha.-Terpinyl acetate	Ester	80-26-2	2.58398e+06	1.5759e+06	1.55005e+06	5.19935e+06	5.19509e+06	5.8921e+06	1.07214	0.00175965	2.85232	1.51213	up
NMW0149	C10H16O2	Geranic acid	Terpenoids	459-80-3	305193	316292	208123	573226	567628	882631	1.02755	0.050523	2.43908	1.28634	up
XMW0503	C8H10O3	2-Acetyl-1,3-cyclohexanedione	Ketone	4056-73-9	363134	241277	264133	1731.5	1965.9	2764.42	1.11868	0.0165119	0.00743982	-7.07052	down
w18	C10H18O2	2,7-Octadiene-1,6-diol, 2,6-dimethyl-, (Z)-	Alcohol	103619-06-3	134801	94084.4	97371.3	4703.8	3910.44	6952.38	1.11122	0.0151738	0.0477128	-4.38948	down
KMW0540	C10H12O2	Eugenol	Phenol	97-53-0	1.01674e+06	1.45099e+06	1.81101e+06	61513.8	57699.2	102456	1.10748	0.0272457	0.051807	-4.27071	down
WMW0046	C11H22O	trans-2-Undecen-1-ol	Alcohol	75039-84-8	55866.4	37360.2	41858.3	6808.03	5544.91	10351.5	1.08814	0.0164975	0.168075	-2.57282	down
KMW0517	C11H20O	2-Undecenal, E-	Aldehyde	53448-07-0	2.19914e+06	1.53065e+06	1.6294e+06	19405.7	18856.1	30748.9	1.11731	0.013648	0.0128771	-6.27905	down
w44	C11H20O4	Butanoic acid, 2-butoxy-1-methyl-2-oxoethyl ester	Ester	7492-70-8	663822	906023	410771	84466.3	79816.8	97334.8	1.09148	0.0568098	0.132089	-2.92042	down
KMW0588	C10H18O	3-Cyclohexene-1-ethanol, .beta.,4-dimethyl-	Alcohol	18479-68-0	49318.8	44966.2	30821	3.93691e+06	3.87143e+06	6.14237e+06	1.11894	0.0252306	111.511	6.80104	up
GMW0087	C10H18O	(E)-2-Decenal	Aldehyde	3913-81-3	2.31696e+07	1.51962e+07	1.88906e+07	11962.4	9921.04	10031.3	1.12158	0.0142752	0.0005574	-10.809	down
KMW0556	C15H24	Naphthalene, decahydro-4a-methyl-1-methylene-7-(1-methylethenyl)-, [4aR-(4a.alpha.,7.alpha.,8a.beta.)]-	Terpenoids	17066-67-0	613576	451986	571728	2.88824e+06	2.55069e+06	4.11993e+06	1.1039	0.0300185	5.83822	2.54553	up
D425	C13H20O	3-Cyclohexene-1-carboxAldehyde, 4-(4-methyl-3-pentenyl)-	Aldehyde	37677-14-8	492181	434601	434357	1.31792e+06	1.22891e+06	1.35713e+06	1.11866	0.000297348	2.86815	1.52012	up
XMW0916	C11H15Br	(5-bromopentyl)-Benzene	Aromatics	14469-83-1	2.8087e+06	1.94781e+06	2.54502e+06	1.25392e+07	1.14578e+07	1.76718e+07	1.10346	0.0251773	5.70686	2.5127	up
KMW0581	C12H16O3	1,2,3-trimethoxy-5-(2-propenyl)-Benzene	Aromatics	487-11-6	2.07883e+06	1.91294e+06	1.81495e+06	5.20381e+06	4.87791e+06	5.44176e+06	1.1179	0.000514629	2.67336	1.41866	up
XMW0455	C8H10O2	1,3-Benzenediol, 4,5-dimethyl-	Phenol	527-55-9	1.03545e+06	1.34774e+06	1.13403e+06	527466	521737	426882	1.09441	0.0108103	0.419675	-1.25266	down
KMW0568	C10H18O2	2H-Pyran-2-one, tetrahydro-6-pentyl-	Ester	705-86-2	11404.8	9900.18	10965.9	421804	405373	359721	1.12205	0.00230888	36.7793	5.20082	up
XMW0204	C16H34	Dodecane, 5,8-diethyl-	Hydrocarbons	24251-86-3	9000	7117	8551	65799	59862	67395	1.12016	0.000961993	7.82617	2.96831	up
D265	C12H23N	Dodecanenitrile	Nitrogen compounds	2437-25-4	880584	676579	602942	48369.4	46023.9	97361.8	1.09548	0.0129685	0.0887712	-3.49376	down
KMW0614	C15H24	Cubenene	Terpenoids	29837-12-5	1.44713e+06	924854	1.0691e+06	457424	418221	663751	1.00743	0.0372621	0.447358	-1.1605	down
D369	C15H26O	Kessane	Terpenoids	3321-66-2	3.62991e+06	3.33455e+06	3.17347e+06	1.0047e+07	9.39824e+06	1.04511e+07	1.11894	0.0005019	2.94896	1.5602	up
NMW0223	C6H6O3	1,2,4-Benzenetriol	Alcohol	533-73-3	2472.54	1795	1778.28	9	9	9	1.12138	0.0127447	0.0044659	-7.80683	down
WMW0021	C15H22	trans-Calamenene	Terpenoids	73209-42-4	784852	564613	631837	38535.6	36681.4	151675	1.04042	0.00345859	0.114517	-3.12637	down
XMW0264	C15H24	Bicyclo[4.4.0]dec-1-ene, 2-isopropyl-5-methyl-9-methylene-	Terpenoids	150320-52-8	2.76383e+06	1.5853e+06	2.01896e+06	219859	216887	633192	1.03458	0.0235604	0.168015	-2.57334	down
NMW0215	C5H11NS3	N,N-Dimethyl-1,2,3-trithian-5-Amine	Heterocyclic compound	31895-21-3	1.23211e+06	857017	907732	55616.8	53961.4	232864	1.03514	0.00702245	0.114267	-3.12952	down
XMW0136	C15H20	4-Isopropyl-6-methyl-1-methylene-1,2,3,4-tetrahydronaphthalene	Terpenoids	50277-34-4	326801	236821	264870	9553.33	11282	68983.8	1.00723	0.0023975	0.108413	-3.20539	down
XMW0388	C15H24	(4aR,8aR)-5,8a-dimethyl-3-propan-2-ylidene-1,2,4,4a,7,8-hexahydronaphthalene	Terpenoids	6813-21-4	802171	627080	621048	1.56215e+06	1.45953e+06	1.61039e+06	1.09985	0.000478278	2.25922	1.17583	up
QWM0005	C7H13NS2	Berteroin	Others	4430-42-6	457.136	335.306	588.164	1232.78	1028.66	1178.33	1.05595	0.00220339	2.4915	1.31701	up
KMW0577	C10H16O2	2H-Pyran-2-one, 5,6-dihydro-6-pentyl-	Heterocyclic compound	54814-64-1	7161.87	10611.2	9498.59	112189	111194	116411	1.11701	4.02708e-06	12.4597	3.63919	up
KMW0604	C15H24	(1S,2E,6E,10R)-3,7,11,11-Tetramethylbicyclo[8.1.0]undeca-2,6-diene	Terpenoids	24703-35-3	7.09538e+06	4.91722e+06	5.38304e+06	397208	375910	1.14711e+06	1.06493	0.00880303	0.110386	-3.17937	down
KMW0619	C14H24O2	Butanoic acid, 3,7-dimethyl-2,6-octadienyl ester, (E)-	Ester	106-29-6	715896	720883	676388	341734	321221	372213	1.11201	6.25686e-05	0.489865	-1.02954	down
D177	C15H24O	(1aR,1bS,2aS,5S,5aS,7aS)-2,2,5,7a-Tetramethyldecahydrocyclopenta[2',3']cyclobuta[1',2':3,4]benzo[1,2-b]oxirene	Terpenoids	104188-24-1	1.02338e+06	944942	897048	2.51425e+06	2.34915e+06	2.61773e+06	1.11785	0.000526518	2.61087	1.38453	up
NMW0218	C10H15NO	Hordenine	Amine	539-15-1	211007	167086	169233	34163.4	33792.5	37504.4	1.11587	0.00893184	0.192683	-2.3757	down
KMW0599	C13H26O2	Dodecanoic acid, methyl ester	Ester	111-82-0	1793.89	1341.31	749.583	27498.7	23665.6	19942.7	1.10487	0.00837463	18.304	4.19409	up
NMW0239	C10H16O3	2(3H)-Furanone, dihydro-5,5-dimethyl-4-(3-oxobutyl)-	Heterocyclic compound	4436-81-1	82498.5	79215.4	75423.6	206174	194841	215459	1.11979	0.00085924	2.59965	1.37832	up
XMW1095	C14H22	Benzene, 1,2-diethyl-3,4,5,6-tetramethyl-	Aromatics	33884-69-4	13640.9	13002.1	12021.4	26388.7	26172.9	37211.2	1.07942	0.0408497	2.32185	1.21527	up
XMW0836	C15H26O	3,7-Cyclodecadiene-1-methanol, .alpha.,.alpha.,4,8-tetramethyl-, [s-(Z,Z)]	Terpenoids	21657-90-9	95789.5	91497.6	86468.8	194086	191124	287837	1.07412	0.0515422	2.45857	1.29782	up
XMW0265	C17H36	Tetradecane, 2,6,10-trimethyl-	Hydrocarbons	14905-56-7	60384.6	50159.8	50795.4	126680	118390	133325	1.11028	0.000273953	2.34532	1.22979	up
XMW0027	C15H26O	Ledol	Terpenoids	577-27-5	164959	183621	141411	32173	31403.7	39158	1.11259	0.00699327	0.209667	-2.25383	down
KMW0633	C13H28O	n-Tridecan-1-ol	Alcohol	112-70-9	54526.9	52781.3	49628.9	123078	115789	132611	1.11682	0.00256004	2.36706	1.24309	up
D300	C15H24	Aristolochene	Terpenoids	26620-71-3	4.08026e+06	2.75892e+06	3.38084e+06	1.44359e+07	1.23772e+07	2.11583e+07	1.09067	0.0392315	4.69386	2.23078	up
XMW1020	C11H15BrO	(3-Bromo-1-methylpropoxymethyl)benzene	Aromatics	51666-29-6	4.22215e+07	2.8791e+07	3.20717e+07	634267	617281	6.58813e+06	1.00316	0.00645806	0.0760512	-3.71689	down
KMW0618	C15H24	Naphthalene, 1,2,3,5,6,8a-hexahydro-4,7-dimethyl-1-(1-methylethyl)-, (1S-cis)-	Terpenoids	483-76-1	2.98017e+06	1.80019e+06	2.2404e+06	68764.2	69026	519401	1.00601	0.0140387	0.0936069	-3.41724	down
XMW0788	C9H9NO4	Phenol, 4-methyl-2-nitro-, acetate (ester)	Ester	54646-55-8	4028.9	3728.57	3282.63	13706	11966.3	15025.4	1.11367	0.00559038	3.68635	1.88219	up
NMW0209	C11H20O2	Undecylenic Acid	Acid	112-38-9	698604	466031	651767	3.70246e+06	3.32595e+06	5.02694e+06	1.1057	0.0204563	6.63694	2.73052	up
KMW0613	C15H24	.alpha.-Farnesene	Terpenoids	502-61-4	471365	260366	336610	1.58335e+06	1.40433e+06	2.0616e+06	1.089	0.0145262	4.72628	2.2407	up
D213	C12H8O	2,4-Hexadiyn-1-one, 1-phenyl-	Ketone	495-74-9	5068.11	3844.85	5510.08	10027	9962.63	11030.9	1.07936	0.00134923	2.15076	1.10485	up
XMW1170	C15H26O2	Butanoic acid, 2-methyl-, 3,7-dimethyl-2,6-octadienyl ester, (Z)-	Terpenoids	51117-19-2	69710.7	67015.5	65973.6	138714	128642	144934	1.11728	0.00312901	2.03399	1.02431	up
NMW0248	C12H16O3	.gamma.-Asarone	Aromatics	5353-15-1	40615.8	35331.1	33211.2	93311.9	86614.7	94444.1	1.11313	8.02914e-05	2.51352	1.32971	up
NMW0211	C10H14O2	1-Cyclohexene-1-carboxylic acid, 4-(1-methylethenyl)-	Terpenoids	7694-45-3	108437	73426	94141.7	497052	456121	675869	1.10577	0.0197439	5.90222	2.56126	up
D403	C13H18O2	Benzeneacetic acid, 4-(1,1-dimethylethyl)-, methyl ester	Ester	3549-23-3	19025.4	12893.5	13887.2	3953.51	4053.15	4428.39	1.10041	0.0273752	0.271471	-1.88113	down
KMW0598	C13H26O	Tridecanal	Aldehyde	10486-19-8	6038.79	6055.91	5079.7	802850	689317	947927	1.12193	0.00847665	142.077	7.15053	up
NMW0227	C15H24	(Z)-1-Methyl-4-(6-methylhept-5-en-2-ylidene)cyclohex-1-ene	Terpenoids	13062-00-5	214251	200061	180227	1.33627e+06	1.14899e+06	1.95802e+06	1.10869	0.0342749	7.4735	2.90178	up
XMW0703	C14H28O2	Hexanoic acid, octyl ester	Ester	4887-30-3	4081.19	3603.26	3334.62	10678.7	8308.66	9494.14	1.1033	0.0084458	2.58475	1.37002	up
WMW0013	C15H24	Bicyclosesquiphellandrene	Terpenoids	54324-03-7	4.03944e+06	2.68566e+06	3.15986e+06	7.39438e+06	6.76462e+06	1.17197e+07	1.03255	0.0677854	2.61799	1.38846	up
WMW0003	C15H24	Eremophilene	Terpenoids	10219-75-7	1.2663e+07	8.60711e+06	9.69028e+06	439628	429784	2.19654e+06	1.03116	0.00702664	0.0990283	-3.33602	down
XMW0391	C15H22	3,5,11-Eudesmatriene	Terpenoids	193615-07-5	45449	46170.2	44814.7	84863	81798.9	113342	1.07929	0.0411404	2.0523	1.03724	up
XMW0097	C14H22	1,5-Cycloundecadiene, 8,8-dimethyl-9-methylene-	Hydrocarbons	62338-54-9	3.7974e+06	2.48471e+06	3.37629e+06	1.35471e+07	1.19453e+07	2.03752e+07	1.08799	0.0403019	4.74897	2.24762	up
w40	C12H22O2	6,7-Dodecanedione	Ketone	13757-90-9	86600.6	100757	85354.6	32355.3	32125.9	27781.4	1.11383	0.00385934	0.338315	-1.56356	down
XMW1091	C10H20O3	1-Pentanol, 5-[(tetrahydro-2H-pyran-2-yl)oxy]-	Heterocyclic compound	76102-74-4	14751.3	9770.16	15192.2	44621.8	42461.4	66508.7	1.07856	0.0332607	3.86748	1.95139	up
NMW0213	C10H10N2	Nicotyrine	Heterocyclic compound	487-19-4	9	9	9	21363	19945	23627	1.12267	0.00244688	2405	11.2318	up
NMW0214	C9H10O2	3-(4-Hydroxyphenyl)propanal	Aldehyde	20238-83-9	1.26023e+07	8.55541e+06	9.54198e+06	479283	468008	2.21748e+06	1.03407	0.00751345	0.103088	-3.27805	down
XMW0817	C15H24	(1S,5S,6R)-6-Methyl-2-methylene-6-(4-methylpent-3-en-1-yl)bicyclo[3.1.1]heptane	Terpenoids	15438-94-5	7.34994e+06	5.16692e+06	5.59385e+06	180291	169596	1.26106e+06	1.01488	0.00496632	0.0889497	-3.49087	down
D103	C14H20O2	Butanoic acid, 1,1-dimethyl-2-phenylethyl ester	Ester	10094-34-5	1.23647e+06	862161	914163	60312.6	58704.2	235904	1.0388	0.00697553	0.117804	-3.08554	down
KMW0583	C13H20O	trans-.beta.-Ionone	Terpenoids	79-77-6	13733.1	10557.2	11735.1	83349.3	82654.4	114233	1.11491	0.0153848	7.77886	2.95956	up
D328	C15H22	(5R,10R)-10-Methyl-6-methylene-2-(propan-2-ylidene)spiro[4.5]dec-7-ene	Terpenoids	28908-27-2	4.77353e+06	3.32334e+06	3.65852e+06	286146	224559	800502	1.05822	0.00765821	0.111541	-3.16435	down
NMW0216	C9H10O3	BenzAldehyde, 3,4-dimethoxy-	Aldehyde	120-14-9	133990	172211	147130	65210.7	67803.4	57150.2	1.10167	0.0111153	0.419482	-1.25332	down
NMW0219	C13H19NO	Diethylpropion	Amine	90-84-6	1534.65	1191.77	1703.74	26782.3	28048.6	23931.3	1.11917	0.00211608	17.7786	4.15207	up
XMW0700	C15H24	4a,8-Dimethyl-2-(prop-1-en-2-yl)-1,2,3,4,4a,5,6,7-octahydronaphthalene	Terpenoids	103827-22-1	1.29152e+06	825352	945470	60902.3	53124.3	231164	1.03697	0.012886	0.112721	-3.14917	down
D338	C15H24	1-methyl-4-(1,2,2-trimethylcyclopentyl)cyclohexa-1,3-diene	Terpenoids	29621-78-1	2.21121e+06	1.17617e+06	1.54047e+06	8.75308e+06	7.742e+06	1.13973e+07	1.09311	0.0143978	5.66015	2.50084	up
KMW0601	C10H12O2	2-Butanone, 4-(4-hydroxyphenyl)-	Ketone	5471-51-2	98626.3	94495.7	89848.4	179178	177455	258324	1.06765	0.0522983	2.17322	1.11983	up
XMW0646	C13H20O3	2-Benzofurancarboxylic acid, 2,4,5,6,7,7a-hexahydro-4,4,7a-trimethyl-, methyl ester, cis-	Ester	77383-92-7	23126	22078	23415	75269	79575	68040	1.11835	0.00382834	3.24814	1.69961	up
XMW0975	C15H24	4-(1,5-dimethyl-1,4-hexadienyl)-1-methyl-Cyclohexene	Terpenoids	17627-44-0	214801	200578	180227	1.06289e+06	929191	1.63982e+06	1.10232	0.0431475	6.09783	2.6083	up
D216	C14H22O	.alpha.-Irone	Terpenoids	79-69-6	156811	99237.3	122083	20822.3	16556.7	53526.6	1.00167	0.0122589	0.240407	-2.05645	down
XMW1364	C15H26	7-Octylidenebicyclo[4.1.0]heptane	Terpenoids	82253-11-0	195101	121477	148589	12772.8	9583.79	41483.8	1.02768	0.0127348	0.137242	-2.86521	down
NMW0230	C5H8N2O2	5,6-Dihydro-5-methyluracil	Heterocyclic compound	696-04-8	8623.85	4068.04	6082.51	9	9	9	1.11954	0.0417235	0.00143813	-9.44159	down
NMW0233	C10H14N2	Anabasine	Heterocyclic compound	494-52-0	12905.8	5844.65	6949.78	88951.4	78773.6	113767	1.09993	0.0117655	10.9529	3.45324	up
XMW0958	C11H23I	1-Iodoundecane	Halogenated hydrocarbons	4282-44-4	55841.9	60651.3	52124.1	278366	251483	332222	1.11607	0.00977861	5.11259	2.35405	up
XMW0157	C15H24O	(2R,3R,6S)-6-Isopropyl-3-methyl-2-(prop-1-en-2-yl)-3-vinylcyclohexanone	Terpenoids	39020-72-9	7940.88	6262.94	5934.96	49795.3	44837.6	61963.8	1.1151	0.0113678	7.77588	2.95901	up
KMW0630	C15H26O	1,6,10-Dodecatrien-3-ol, 3,7,11-trimethyl-, (E)-	Terpenoids	40716-66-3	717717	722935	677613	342881	305531	373967	1.10553	0.00021043	0.482649	-1.05095	down
D178	C15H24O	(1R,3aR,5aR,9aS)-1,4,4,7-Tetramethyl-1,2,3,3a,4,5a,8,9-octahydrocyclopenta[c]benzofuran	Terpenoids	104188-25-2	95953.5	79181.5	89835.9	222668	227223	213517	1.11428	4.08976e-05	2.5037	1.32406	up
XMW1006	C15H24O	(1S,4R,7S,8R,11R,13R)-4,7,11-Trimethyl-5-oxatetracyclo[5.4.2.01,8.04,13]tridecane	Terpenoids	18319-31-8	802665	754798	726795	1.81866e+06	1.71431e+06	1.89009e+06	1.11881	0.000575604	2.3741	1.24738	up
NMW0234	C7H6O4	Patulin	Heterocyclic compound	149-29-1	1.32204e+06	1.23535e+06	1.19056e+06	3.15814e+06	2.97492e+06	3.27084e+06	1.11918	0.000446949	2.50908	1.32716	up
D347	C14H28O2	n-Capric acid isobutyl ester	Ester	30673-38-2	146668	139413	130119	360916	334920	378875	1.11757	0.00123327	2.5822	1.3686	up
NMW0235	C11H8O	1-NaphthalenecarboxAldehyde	Aldehyde	66-77-3	56900.1	42576.3	46358.4	2253.14	2412.21	12588.8	1.01651	0.00175775	0.118313	-3.07932	down
XMW0592	C16H34	Pentadecane, 4-methyl-	Hydrocarbons	2801-87-8	15131.5	14554.5	12125.3	27167.1	26001.4	39347.5	1.05239	0.052561	2.21271	1.14581	up
XMW0087	C13H18O2	1-Pentanone, 1-(p-anisyl)-3-methyl-	Ketone	66333-82-2	62711.6	56120.9	54399.8	119379	115661	170051	1.07398	0.0453034	2.33843	1.22554	up
D438	C15H22O	Sesquirosefuran	Heterocyclic compound	39007-93-7	29215.9	29528.4	25573.3	54793.7	55275.3	79482.3	1.06837	0.046987	2.24806	1.16868	up
KMW0622	C15H24	Cyclohexene, 3-(1,5-dimethyl-4-hexenyl)-6-methylene-, [S-(R*,S*)]-	Terpenoids	20307-83-9	88116.4	54544.7	68941.9	9	9	9	1.12183	0.0184852	0.000127597	-12.9361	down
XMW0841	C13H16O2	1-Penten-3-one, 1-(4-methoxyphenyl)-4-methyl-	Ketone	103-13-9	155032	141823	141786	306950	300488	440622	1.07813	0.045845	2.38933	1.25661	up
WMW0043	C15H26O	d-Nerolidol	Terpenoids	142-50-7	1.26414e+06	1.18599e+06	1.11558e+06	3.04194e+06	2.85557e+06	3.15592e+06	1.11819	0.000398173	2.53902	1.34427	up
XMW0471	C13H16O2	3-Hexen-1-ol, benzoate, (Z)-	Ester	25152-85-6	57475.6	50712.6	54322.8	117807	109380	117219	1.11663	0.000107702	2.11927	1.08357	up
XMW0842	C15H26O	Palustrol (Ledum)	Terpenoids	5986-49-2	46698.7	46256.5	42339.7	98988.3	92330.5	110826	1.11085	0.00649735	2.23323	1.15913	up
NMW0245	C11H15NO2	N-Methyl-3,4-methylenedioxyamphetAmine	Amine	42542-10-9	2294.56	1759.8	1331.39	5230.62	5586.46	4351.37	1.06713	0.00272617	2.8164	1.49385	up
XMW0843	C15H26O	(2E,4S,7E)-4-Isopropyl-1,7-dimethylcyclodeca-2,7-dienol	Alcohol	198991-79-6	104872	100575	94332	256360	243353	282373	1.11683	0.0031415	2.60887	1.38343	up
D337	C15H24O	2H-2a,7-Methanoazuleno[5,6-b]oxirene, octahydro-3,6,6,7a-tetramethyl-	Terpenoids	29597-36-2	123429	147259	123512	52291.7	48359.8	54696.8	1.1108	0.0072664	0.394085	-1.34342	down
NMW0256	C14H22O	Phenol, 4-(1,1,3,3-tetramethylbutyl)-	Phenol	140-66-9	740171	601509	613604	9	9	9	1.12247	0.00459696	1.38087e-05	-16.1441	down
XMW0389	C15H26O	Caryophyllenyl alcohol	Terpenoids	913176-41-7	24791.4	25901	24055.3	55186.3	52242	59655.8	1.1165	0.00319555	2.2353	1.16047	up
XMW0997	C15H24O2	Bornyl tiglate	Ester	101223-92-1	22704.8	25551.7	21118.6	105561	98695	180982	1.09333	0.0570107	5.55297	2.47326	up
NMW0301	C8H9NO2	Acetaminophen	Phenol	103-90-2	252433	295592	460511	1.23077e+06	1.26945e+06	1.39987e+06	1.08395	0.000372823	3.86707	1.95124	up
XMW1161	C10H12O3	4',6'-Dihydroxy-2',3'-dimethylacetophenone	Ketone	7743-14-8	10803.2	12370.1	12191.1	2438	2665	883.901	1.05248	0.00021401	0.169292	-2.56241	down
XMW0557	C12H12OS	3-Acetyl-2,5-dimethylbenzo(b)thiophene	Heterocyclic compound	6179-04-0	22248.3	23553.7	32873	108585	111794	117446	1.10656	5.39437e-05	4.29394	2.1023	up
KMW0645	C15H26O	Levomenol	Terpenoids	23089-26-1	140501	196178	276848	666678	669989	687845	1.06773	0.00590097	3.29979	1.72238	up
XMW0749	C16H30	8-Hexadecyne	Hydrocarbons	19781-86-3	54706.2	68372.5	98121.4	236082	240328	268989	1.07932	0.000560075	3.3698	1.75266	up
NMW0268	C9H8O3	2-Propenoic Acid, 3-(2-hydroxyphenyl)-	Acid	583-17-5	16594.8	12550.5	11692.2	5338.43	2661.67	3613.25	1.05529	0.010575	0.284379	-1.81411	down
XMW0105	C12H12N2O	Ethanone, 1-(5-methyl-1-phenyl-1H-pyrazol-4-yl)-	Heterocyclic compound	6123-63-3	6763.73	7942.89	8919.73	9	9	9	1.12254	0.00621967	0.00114279	-9.77322	down
NMW0303	C10H13N3	Debrisoquine	Heterocyclic compound	1131-64-2	49491.4	43704.2	60705.1	9	9	9	1.12237	0.009334	0.000175438	-12.4768	down
XMW0017	C17H34O2	Hexadecanoic acid, methyl ester	Ester	112-39-0	1164.64	1162.97	1836.1	43189.9	43168	41854.4	1.11805	4.26339e-06	30.7928	4.94452	up
NMW0270	C13H10O	Benzophenone	Ketone	119-61-9	963646	808419	1009451	9	9	9	1.12253	0.00427705	9.70694e-06	-16.6526	down
NMW0308	C15H22O	2,6,9,11-Dodecatetraenal, 2,6,10-trimethyl-	Terpenoids	4955-32-2	38763.4	34074.3	40983.2	17815.8	15878.1	20370.9	1.08904	0.00231448	0.475	-1.074	down
WMW0203	C16H30O2	Palmitoleic Acid	Acid	373-49-9	7540	3023	8358	9	9	9	1.11646	0.062904	0.00142699	-9.45281	down
D126	C15H14O2	Benzeneacetic acid, phenylmethyl ester	Ester	102-16-9	4741	4379	5553	9	9	9	1.12238	0.00501703	0.00184011	-9.08599	down
WMW0119	C15H22O2	Benzoic acid, 2-ethylhexyl ester	Ester	5444-75-7	5964.93	9044.85	6501.08	34162.4	32797.5	45872.2	1.10071	0.0144356	5.24535	2.39104	up
KMW0699	C18H38	Octadecane	Hydrocarbons	593-45-3	7987.07	10230	9299.57	9	9	9	1.12263	0.00500329	0.000981225	-9.99313	down
NMW0359	C15H24O2	3,7,11-Trimethyl-dodeca-2,6,10-trienoic Acid	Acid	7548-13-2	4695.95	6527.9	7348.52	2233.77	2712.81	2480.27	1.07171	0.038244	0.399887	-1.32234	down
XMW0754	C15H22O	Methanol, (cyclohexyl)(2,3-dimethylphenyl)-	Alcohol	349498-47-1	4297.41	4842.71	4690.97	1362.4	2176.32	1724.2	1.08193	0.00100444	0.380514	-1.39398	down
XMW0165	C15H26O	Cyclohexanol, 3-ethenyl-3-methyl-2-(1-methylethenyl)-6-(1-methylethyl)-, [1R-(1.alpha.,2.alpha.,3.beta.,6.alpha.)]-	Terpenoids	35727-45-8	142143	136895	193166	23445.2	23239.3	25550.7	1.11449	0.0175061	0.152975	-2.70863	down
NMW0280	C15H26O2	2-Furanmethanol, tetrahydro-.alpha.,.alpha.,5-trimethyl-5-(4-methyl-3-cyclohexen-1-yl)-, [2S-[2.alpha.,5.beta.(R*)]]-	Terpenoids	26184-88-3	30820.1	33174.5	38372.5	5473.95	6740.95	6060.83	1.11764	0.00527569	0.178531	-2.48575	down
XMW1421	C13H16O3	3,4-Hexanedione, 1-(phenylmethoxy)-	Ketone	118006-73-8	7218.35	10845.8	10608.9	152727	136558	240521	1.11015	0.0352609	18.4775	4.2077	up
NMW0327	C8H8O4	Benzoic Acid, 2,4-dihydroxy-6-methyl-	Acid	480-64-8	4826.3	7338.3	5826.94	2338.46	1868.06	2677.64	1.0651	0.0275378	0.382633	-1.38597	down
WMW0096	C15H32O	n-Pentadecanol	Alcohol	629-76-5	5868.54	6737.98	7263.85	1683.1	1367.38	2678.01	1.06623	0.00114767	0.288293	-1.79439	down
NMW0447	C15H22N2O	Mepivacaine	Heterocyclic compound	96-88-8	9	9	9	5569	3820.95	2189.91	1.11781	0.0586026	428.884	8.74444	up
KMW0723	C18H34O2	Oleic Acid	Acid	112-80-1	9	9	9	9430.83	7252.28	5471.75	1.12131	0.0232527	820.55	9.68045	up
KMW0661	C15H26O	.alpha.-Bisabolol	Terpenoids	515-69-5	247700	292438	455222	1.2223e+06	1.22006e+06	1.37063e+06	1.0829	0.000408569	3.83076	1.93763	up
XMW0092	C20H42	Hexadecane, 2,6,10,14-tetramethyl-	Hydrocarbons	638-36-8	12663.1	13012.7	9305.43	9	9	9	1.1221	0.0101321	0.000771841	-10.3394	down
NMW0344	C14H26O2	Myristoleic Acid	Acid	544-64-9	10557.8	15415.8	13743.9	9	9	9	1.12244	0.0114017	0.000679803	-10.5226	down
NMW0001	C19H36O2	9-Octadecenoic acid (Z)-, methyl ester	Ester	112-62-9	9	9	9	12999	10608	6049	1.11996	0.0400621	1098.37	10.1011	up
KMW0726	C14H30O	1-Tetradecanol	Alcohol	112-72-1	71828.8	55222.7	41908	21056.3	22349.3	24992.3	1.0501	0.0582861	0.404818	-1.30465	down
XMW0050	C15H24O	Isospathulenol	Terpenoids	88395-46-4	628832	532216	662587	9	9	9	1.12253	0.00410483	1.48056e-05	-16.0435	down
KMW0665	C16H32O2	n-Butyl laurate	Ester	106-18-3	10513.2	10856.1	12077.7	2134.34	1301.18	2316.89	1.09807	0.000217591	0.171985	-2.53964	down
XMW1037	C15H22O	Phenol, 5-(1,5-dimethyl-4-hexenyl)-2-methyl-, (R)-	Phenol	30199-26-9	8497.85	11601.7	9307.5	4050.99	3893.39	5151.61	1.07137	0.0163551	0.445335	-1.16704	down
WMW0144	C17H34	1-Heptadecene	Hydrocarbons	6765-39-5	41995	50393.5	77037.9	183551	180894	201239	1.07552	0.00114485	3.33882	1.73934	up
NMW0299	C15H24O	Santalol, E-cis,epi-.beta.-	Terpenoids	14490-17-6	47577.8	51592.3	84668.2	209507	206914	218526	1.07903	0.0034599	3.45383	1.7882	up
XMW0146	C12H18O2	(3S,3aR)-3-Butyl-3a,4,5,6-tetrahydroisobenzofuran-1(3H)-one	Ester	4567-33-3	16574.8	19590	16614.4	3453.54	3953.21	5722.85	1.09428	0.000744116	0.248765	-2.00715	down
XMW0750	C14H26O	(E)-Tetradec-2-enal	Aldehyde	51534-36-2	8400.27	7980.38	5786.64	9	9	9	1.12185	0.0118427	0.00121801	-9.68126	down
KMW0647	C13H20O3	Methyl jasmonate	Ester	1211-29-6	453605	379832	467312	9033.21	9122.19	9343.57	1.1218	0.00407138	0.0211409	-5.56382	down
NMW0266	C12H16O3	.beta.-Asarone	Aromatics	5273-86-9	84919.3	72282.6	89671.5	9	9	9	1.12248	0.00395327	0.000109368	-13.1585	down
XMW0507	C11H16O2	1,3-Benzenediol, 5-pentyl-	Phenol	500-66-3	4728.74	5563.75	7914.81	9	9	9	1.12169	0.0238884	0.00148292	-9.39734	down
KMW0654	C15H30O2	Methyl tetradecanoate	Ester	124-10-7	9	9	510.172	8666.6	14762.2	7275.02	1.00935	0.0478034	58.1322	5.86127	up
XMW0230	C19H40	Pentadecane, 2,6,10,14-tetramethyl-	Hydrocarbons	1921-70-6	8806.14	12182.9	16330.5	28742.6	28687.1	30677.2	1.03853	0.0108771	2.36087	1.23932	up
w14	C16H34O	Octane, 1,1'-oxybis-	Hydrocarbons	629-82-3	6567.8	9351.48	12496.2	30187.5	29328.9	31875	1.06972	0.00228044	3.21626	1.68538	up
NMW0289	C13H26O2	Tridecanoic Acid	Acid	638-53-9	1889.53	2531.34	2547.14	10128.9	10402.2	10883.9	1.11173	1.23626e-05	4.50845	2.17263	up
XMW0751	C15H24O	Bergamotol, Z-.alpha.-trans-	Terpenoids	88034-74-6	206503	247032	259250	80609.7	69035.1	93184.9	1.09962	0.00411337	0.340677	-1.55352	down
D119	C14H20O	2-Benzylidene-1-heptanol	Alcohol	101-85-9	246850	244899	214403	1.67866e+06	1.51483e+06	1.94469e+06	1.11918	0.0068041	7.2763	2.86321	up
D354	C13H22O2	3-Cyclohexene-1-carboxAldehyde, 4-(4-hydroxy-4-methylpentyl)-	Aldehyde	31906-04-4	11830.8	12364	19366.4	33862.5	38710.3	36938	1.06054	0.00336663	2.51396	1.32996	up
w24	C13H20O3	3-Buten-2-one, 4-(4-hydroxy-2,2,6-trimethyl-7-oxabicyclo[4.1.0]hept-1-yl)-	Ketone	38274-01-0	7954.82	9814	16277.4	43435.7	41524.2	45902.1	1.07167	0.00155341	3.84366	1.94248	up
XMW1022	C15H22O	3,7-Cyclodecadien-1-one, 3,7-dimethyl-10-(1-methylethylidene)-, (E,E)-	Terpenoids	6902-91-6	62197.9	69343.9	107084	234374	248348	245930	1.07644	0.00409376	3.05353	1.61048	up
KMW0683	C17H36	Heptadecane	Hydrocarbons	629-78-7	27993.6	32353.8	35564.9	1424.63	481.89	1984.29	1.08544	0.00386879	0.0405664	-4.62357	down
XMW1021	C15H22O	1,7-Dimethyl-4-(propan-2-ylidene)tricyclo[4.4.0.02,7]decan-3-one	Terpenoids	62332-96-1	6277.2	8788.22	6559.57	2614.8	3393.61	2885.42	1.07967	0.0258699	0.411276	-1.28182	down
NMW0003	C15H22O	2,6,9,11-Dodecatetraenal, 2,6,10-trimethyl-, (E,E,E)-	Terpenoids	17909-77-2	39227.6	48953.2	41891.2	11301.6	9141.07	13863.4	1.09948	0.00269696	0.263747	-1.92277	down
XMW0134	C20H42	Hexadecane, 2,6,11,15-tetramethyl-	Hydrocarbons	504-44-9	6824.68	9473.19	8958.67	1195.99	772.411	1857.5	1.07981	0.00635436	0.151482	-2.72279	down
XMW0208	C16H32O2	Octanoic acid, octyl ester	Ester	2306-88-9	18659.1	20872.4	21328.1	3115.27	2257.04	4468.72	1.09597	0.000122996	0.1617	-2.6286	down
NMW0347	C16H26O2	2,6,10-Dodecatrienoic acid, 3,7,11-trimethyl-, methyl ester, (E,E)-	Ester	3675-00-1	58450	64459.6	69759.2	9353.05	7580.13	13653.4	1.10154	0.000582984	0.158752	-2.65515	down
D251	C20H32	Hibaene	Terpenoids	2359-73-1	16112	6886	18960	9	9	9	1.11798	0.0617421	0.000643501	-10.6018	down
XMW1362	C19H38O	Oxirane, heptadecyl-	Heterocyclic compound	67860-04-2	134623	64029	147206	9	9	9	1.12055	0.0469008	7.80667e-05	-13.6449	down
D127	C16H16O3	Benzeneacetic acid, (4-methoxyphenyl)methyl ester	Ester	102-17-0	9	9	9	2619.64	1675.44	3669.46	1.11967	0.0442546	294.983	8.20449	up
NMW0435	C8H8N2O3S	Zonisamide	Heterocyclic compound	68291-97-4	2885.45	1291.06	1879.5	10855.6	8018.96	14958.9	1.0677	0.038378	5.58675	2.48201	up
XMW1458	C15H20O4	Pentandioic Acid, (p-t-butylphenyl) ester	Acid	212762-88-4	9	9	9	1917.76	1190.78	944.408	1.11866	0.0442778	150.109	7.22987	up
D377	C18H37Cl	Octadecane, 1-chloro-	Halogenated hydrocarbons	3386-33-2	568.697	828.871	699.073	69893.9	56042.9	33109.7	1.11441	0.0395505	75.8577	6.24522	up
XMW1372	C19H36O2	(Z)-Ethyl heptadec-9-enoate	Ester	1089325-29-0	9	383.509	9	13621.1	9623.15	6886.05	1.02394	0.0363359	75.0427	6.22964	up
KMW0727	C21H44	Heneicosane	Hydrocarbons	629-94-7	386.631	862.324	717.22	68274	57007	34098	1.10957	0.0347917	81.0604	6.34093	up
XMW0877	C23H46	9-Tricosene, (Z)-	Hydrocarbons	27519-02-4	9	9	9	6820.62	5226.25	3772.93	1.12088	0.026831	585.918	9.19456	up
ZMW0001	C23H48	Tricosane	Hydrocarbons	638-67-5	1026.36	9	9	38465	27046	18956	1.01018	0.0385823	80.8794	6.3377	up

## Sheet: F1TH-1 vs F1TH-5
Index	Formula	Compounds	Class I	CAS	F1TLeaf-1	F1TLeaf-2	F1TLeaf-3	F1TBloom-1	F1TBloom-2	F1TBloom-3	VIP	P-value	Fold_Change	Log2FC	Type
XMW1056	C6H10O2	2-Butenoic acid, ethyl ester, (Z)-	Ester	6776-19-8	3348.97	6800.57	4001.54	98242.6	102057	100959	1.05512	4.37501e-07	21.2888	4.41202	up
XMW0225	C4H8OS	Thiirane, (methoxymethyl)-	Heterocyclic compound	19858-14-1	6851.13	8482.74	6122.92	61081.5	63380.7	74105.9	1.05995	0.00370916	9.25433	3.21013	up
KMW0045	C2H6S2	DiSulfur compounds, dimethyl	Sulfur compounds	624-92-0	189002	106831	177664	8410.99	10090	11403.6	1.0537	0.0288087	0.0631569	-3.98492	down
XMW0887	C8H16O2	Butanoic acid, 2-methyl-, propyl ester	Ester	37064-20-3	16672.3	27874.3	12127.2	947054	1.06571e+06	1.11329e+06	1.05738	0.00215545	55.1587	5.78552	up
WMW0107	C8H14	1,5-Heptadiene, 2-methyl-, (Z)-	Hydrocarbons	41044-64-8	263023	139656	99945.8	1.25995e+06	1.21673e+06	1.29215e+06	1.02849	0.000436412	7.49831	2.90657	up
KMW0046	C6H12O	2-Hexanone	Ketone	591-78-6	199648	104783	75650.8	1.08336e+06	1.03656e+06	1.1128e+06	1.03204	0.000121963	8.50531	3.08836	up
XMW0115	C4H9NO	5-Methyloxazolidine	Heterocyclic compound	58328-22-6	152737	77970.2	62918	777130	731841	802751	1.03351	7.3659e-05	7.87302	2.97692	up
KMW0067	C6H10O	3-Penten-2-one, 4-methyl-	Ketone	141-79-7	57322.4	32565.2	28622	230052	217571	233352	1.03647	0.000311314	5.74616	2.5226	up
KMW0133	C7H16O	1-Hexanol, 4-methyl-	Alcohol	818-49-5	9	9	9	9389.33	8048.2	9176.71	1.06505	0.00219775	985.713	9.94502	up
XMW0888	C8H16O2	Butanoic acid, 3-methyl-, propyl ester	Ester	557-00-6	9	9	9	1.06858e+06	1.19691e+06	1.22593e+06	1.06504	0.00172114	129311	16.9805	up
KMW0159	C7H16O	1-Heptanol	Alcohol	111-70-6	5742.86	7068.19	9557.85	124247	138166	146409	1.05896	0.00196227	18.2763	4.1919	up
KMW0057	C5H10O	2-Penten-1-ol, (Z)-	Alcohol	1576-95-0	9	9	9	242315	256376	305382	1.06502	0.00504802	29780.5	14.8621	up
KMW0079	C8H18	Octane	Hydrocarbons	111-65-9	184313	98232.5	70889.2	985058	944249	1.01188e+06	1.0324	0.000137624	8.32172	3.05688	up
KMW0066	C6H12O	Hexanal	Aldehyde	66-25-1	1.51136e+06	802114	558606	7.91386e+06	7.5905e+06	8.15446e+06	1.02988	0.000159587	8.23753	3.04221	up
XMW1432	C7H12	2,4-Dimethyl 1,4-pentadiene	Hydrocarbons	4161-65-3	52268.2	27476.3	20203.3	271229	262710	280941	1.0319	0.000181701	8.15305	3.02734	up
WMW0187	C6H14O	2-Hexanol	Alcohol	626-93-7	312090	167461	126871	1.56808e+06	1.50913e+06	1.61114e+06	1.03331	0.000209456	7.73116	2.95069	up
XMW0279	C7H14O	E-1-Methoxy-4-hexene	Hydrocarbons	134777-60-9	284797	147424	106196	1.47948e+06	1.40916e+06	1.53717e+06	1.02995	9.4087e-05	8.22003	3.03914	up
KMW0070	C8H10	Benzene, 1,3-dimethyl-	Aromatics	108-38-3	21641.1	15466.3	17340.8	202276	208391	214782	1.06164	2.36612e-05	11.487	3.52194	up
XMW0484	C7H10O	Furan, 2-propyl-	Heterocyclic compound	4229-91-8	52561.4	27876.8	19474.2	270858	261473	278906	1.02959	0.000244045	8.11947	3.02139	up
NMW0756	C4H10O2	1,3-Butanediol	Alcohol	107-88-0	312014	166391	123102	1.57024e+06	1.49796e+06	1.60992e+06	1.03177	0.000167855	7.77734	2.95928	up
XMW0574	C8H14O2	4-Penten-1-ol, propanoate	Ester	30563-30-5	4048.34	1916.19	2462.01	315113	385999	401309	1.06043	0.00523827	130.827	7.03152	up
KMW0140	C5H7NS	Thiazole, 4,5-dimethyl-	Heterocyclic compound	3581-91-7	1.90705e+06	3.55154e+06	793040	23834.7	25380.1	25766.5	1.04318	0.123907	0.0119939	-6.38156	down
WMW0185	C8H8	1,3,5,7-Cyclooctatetraene	Ester	629-20-9	9	9	9	12998.5	13600.6	14871.9	1.06504	0.00159391	1535.96	10.5849	up
XMW1117	C8H14O2	2-Propenoic acid, pentyl ester	Ester	2998-23-4	6233.17	3906.02	5651.19	1.14753e+06	1.28141e+06	1.34329e+06	1.06351	0.00211908	238.894	7.90023	up
KMW0036	C6H12O	3-Hexanone	Ketone	589-38-8	10541.7	5687.61	4262.9	56150.4	53800	56667.9	1.03455	0.00025955	8.13081	3.0234	up
KMW0047	C5H8O	2-Butenal, 2-methyl-	Aldehyde	1115-11-3	8581.14	4713.87	5430.91	45301.1	43653	48700.2	1.04841	4.51692e-05	7.351	2.87794	up
XMW0630	C9H18	1-Hexene, 3,5,5-trimethyl-	Hydrocarbons	4316-65-8	9	9	9	229806	254204	304417	1.06498	0.00691259	29201	14.8337	up
XMW1114	C8H16	1-Octene	Hydrocarbons	111-66-0	263618	141373	99945.8	1.273e+06	1.21293e+06	1.2926e+06	1.02839	0.00033835	7.48316	2.90365	up
KMW0147	C7H9N	Pyridine, 2-ethyl-	Heterocyclic compound	100-71-0	9	9	9	26476.9	29576.2	31569.5	1.065	0.00256487	3245.28	11.6641	up
KMW0224	C8H10O	Benzene, (methoxymethyl)-	Ether	538-86-3	327168	158806	193238	4.9795e+07	5.9096e+07	6.40403e+07	1.06163	0.00524236	254.606	7.99212	up
KMW0060	C7H8	Toluene	Aromatics	108-88-3	5.79852e+06	4.15554e+06	4.42884e+06	350583	337419	392058	1.06083	0.0128156	0.0750934	-3.73517	down
XMW0101	C7H14O2	1-Ethylpropyl acetate	Ester	620-11-1	921.697	830.872	703.897	6079.02	4560.1	5725.07	1.05763	0.008676	6.66168	2.73589	up
XMW0671	C5H10N2	1,7-Diazabicyclo[2.2.0]heptane	Heterocyclic compound	279-42-5	19449.5	34282.5	7389.34	9	9	9	1.0575	0.120122	0.000441744	-11.1445	down
D131	C5H8O	3-Pentyn-1-ol	Alcohol	10229-10-4	43458.6	22711.6	16623.4	213103	202649	220533	1.02936	0.000139626	7.6852	2.94208	up
KMW0084	C5H5N	Pyridine	Heterocyclic compound	110-86-1	371839	225483	345928	16353.5	22197.4	19986.5	1.05638	0.0224591	0.0620593	-4.01021	down
XMW0312	C8H10	Ethylbenzene	Aromatics	100-41-4	11241.7	5892.65	8986.53	135548	122413	137109	1.05498	0.000532013	15.1247	3.91883	up
WMW0188	C5H8O	2-Pentyn-1-ol	Alcohol	6261-22-9	254674	131390	99347.6	1.2559e+06	1.17182e+06	1.26288e+06	1.02991	0.000157505	7.60303	2.92657	up
NMW0754	C5H8O2	Acetylacetone	Ketone	123-54-6	9428.86	5361.42	3853.17	46738.7	44355.3	50110.1	1.0334	6.51256e-05	7.57392	2.92104	up
XMW0878	C7H10	1,4-Cyclohexadiene, 1-methyl-	Hydrocarbons	4313-57-9	16594.7	8752.81	7569.33	69544.6	64812	70372.8	1.03214	0.000232988	6.2196	2.63682	up
NMW0771	C4H9NO	N,N-Dimethylacetamide	Amine	127-19-5	18536.9	25118	7000.78	9	9	9	1.05922	0.0859355	0.000533011	-10.8735	down
KMW0405	C4H8O2	Propanoic Acid, 2-methyl-	Acid	79-31-2	2721.4	2680.91	3083.73	517525	563279	659771	1.06459	0.00523106	205.11	7.68026	up
XMW0436	C10H18O	2H-Pyran, 2-ethenyltetrahydro-2,6,6-trimethyl-	Heterocyclic compound	7392-19-0	2145.62	2351.21	2063.67	5545.68	6757.98	8033.68	1.04409	0.02232	3.09997	1.63225	up
KMW0097	C5H6OS	2-Methyl-3-furanthiol	Heterocyclic compound	28588-74-1	236391	273387	145787	45234.6	49639.3	54871.7	1.02675	0.0463176	0.228422	-2.13022	down
KMW0135	C6H8O	2-Cyclohexen-1-one	Ketone	930-68-7	9389.7	4979.62	6914.06	236927	299731	332220	1.05856	0.00954401	40.8243	5.35136	up
KMW0151	C6H12O3	Butanoic acid, 3-hydroxy-, ethyl ester	Ester	5405-41-4	880.957	1026.91	461.422	39812.8	43240.2	45018.8	1.05734	0.00117903	54.055	5.75636	up
NMW0784	C7H12O2	Ethyl tiglate	Ester	5837-78-5	2.99433e+06	5.50909e+06	1.19369e+06	36585.4	39339.7	41615.7	1.04195	0.125352	0.0121212	-6.36632	down
KMW0148	C10H16	.alpha.-Pinene	Terpenoids	80-56-8	276795	171022	172920	7.55526e+06	9.62158e+06	1.09198e+07	1.0599	0.0111718	45.2634	5.50027	up
XMW0632	C10H16	Bicyclo[3.1.1]hept-2-ene, 3,6,6-trimethyl-	Terpenoids	4889-83-2	34883.6	21647.6	24661.2	177121	194681	245408	1.05064	0.0106335	7.60182	2.92634	up
WMW0023	C10H16	(+)-alpha-Pinene	Terpenoids	7785-70-8	299853	191519	175126	8.078e+06	1.03054e+07	1.16597e+07	1.05956	0.0110948	45.0761	5.49429	up
XMW1229	C9H14	Bicyclo(3.3.1)non-2-ene	Hydrocarbons	6671-66-5	82428.9	40941.8	50475.1	1.31249e+07	1.56594e+07	1.70454e+07	1.06187	0.00563599	263.623	8.04233	up
D78	C4H6OS	Dihydro-3-(2H)-thiophenone	Heterocyclic compound	1003-04-9	1092.9	802.605	850.839	218648	263929	284719	1.06411	0.00580581	279.388	8.12613	up
XMW0519	C10H14	Cyclobutanespiro-2'-bicyclo[1.1.0]butane-4'-spirocyclobutane	Hydrocarbons	76308-11-7	113733	70837	68998.6	2.75685e+06	3.53681e+06	4.02246e+06	1.05933	0.011765	40.6837	5.34638	up
XMW1300	C9H18	Cyclopentane, butyl-	Hydrocarbons	2040-95-1	21343.7	23010.3	17375.7	358324	433836	475014	1.06193	0.00704641	20.5278	4.35951	up
NMW0787	C6H12O2	4-methyl-Pentanoic Acid	Acid	646-07-1	16672.3	23680.8	11056.5	940299	1.0655e+06	1.11364e+06	1.05893	0.00243848	60.6781	5.9231	up
WMW0201	C10H16	Bicyclo[2.2.1]heptane, 7,7-dimethyl-2-methylene-	Terpenoids	471-84-1	34232.5	19573.3	24669.8	176784	235594	267308	1.04706	0.0151591	8.66112	3.11455	up
XMW0890	C8H14O	1-Hepten-6-one, 2-methyl-	Ketone	10408-15-8	8534.36	4503.43	3358.86	1.34302e+06	1.50062e+06	1.73511e+06	1.06	0.00555626	279.249	8.12541	up
XMW0901	C5H7ClO2	3-Chloro-2,4-pentanedione	Ketone	1694-29-7	1067.28	392.604	720.565	6996.58	7217.85	7725.12	1.03471	2.4393e-05	10.0619	3.33083	up
XMW0291	C5H9NO2	N-Acetylisoxazolidine	Heterocyclic compound	115615-36-6	2465.89	1883.12	1587.59	57142.5	73427.6	83636.8	1.06048	0.0120544	36.0825	5.17323	up
NMW0785	C5H8O2	Tiglic Acid	Acid	80-59-1	1.73291e+06	3.1682e+06	702765	22186.8	20894.7	23103.6	1.04294	0.12294	0.0118106	-6.40377	down
KMW0172	C10H16	Camphene	Terpenoids	79-92-5	34793	20222.6	24661.2	192183	221507	267797	1.05009	0.00969915	8.55313	3.09645	up
XMW0023	C10H16	4-methyl-1-(1-methylethyl)-Bicyclo[3.1.0]hex-2-ene	Hydrocarbons	28634-89-1	850460	415532	498941	1.18295e+08	1.40123e+08	154317421	1.06152	0.00579117	233.854	7.86946	up
KMW0112	C8H10	o-Xylene	Aromatics	95-47-6	11644.8	8262.3	10284.2	111171	114048	120670	1.06141	0.000203986	11.4566	3.5181	up
KMW0115	C8H8	Styrene	Aromatics	100-42-5	11798.4	7075.53	10643.3	432864	433159	432945	1.06153	1.0483e-05	44.0071	5.45966	up
XMW0307	C8H10	p-Xylene	Aromatics	106-42-3	25734	15768.2	17495.1	202273	209259	217899	1.0569	1.34063e-05	10.6688	3.41533	up
XMW1299	C10H22	Heptane, 3,3,5-trimethyl-	Hydrocarbons	7154-80-5	14703.3	13605.7	8144.31	98721.4	106044	118438	1.04963	0.00149706	8.86622	3.14832	up
XMW0885	C10H16	Santolina triene	Hydrocarbons	2153-66-4	9	9	9	317734	392010	425087	1.06493	0.00696799	42030.8	15.3592	up
WMW0109	C8H16O2	Propanoic acid, 2-methyl-, 2-methylpropyl ester	Ester	97-85-8	14259	13109.1	7518.02	99008.8	108293	119454	1.04801	0.0015326	9.36635	3.22749	up
NMW0777	C4H8S2	DiSulfur compounds, methyl 2-propenyl	Sulfur compounds	2179-58-0	1254.9	1245.19	619.483	47510.4	61213.2	69084.6	1.05681	0.0114473	56.9977	5.83283	up
XMW1200	C7H12O2	2-Methylbut-2-en-1-yl acetate	Alcohol	33425-30-8	12447.4	16631.5	13803	447624	566797	635674	1.06223	0.0103204	38.4799	5.26603	up
XMW0065	C4H6N2	Fomepizole	Heterocyclic compound	7554-65-6	8798.32	5274.45	5349.79	176120	259291	267698	1.05757	0.0159318	36.2006	5.17794	up
XMW0013	C10H16	1,7,7-trimethyl-Tricyclo[2.2.1.0(2,6)]heptane	Terpenoids	508-32-7	106952	72290	72351	2.70725e+06	3.32426e+06	3.60011e+06	1.06134	0.0069661	38.2825	5.25861	up
XMW1058	C7H12O2	Cyclopentanol, acetate	Ester	933-05-1	9643.93	7138.31	5189.18	236492	298269	333467	1.05874	0.00982916	39.5162	5.30437	up
XMW1424	C2H3N3	1H-1,2,3-Triazole	Heterocyclic compound	288-36-8	20190.2	25362.4	21228.8	254239	270376	295214	1.06289	0.00193401	12.2763	3.61781	up
WMW0085	C4H10S2	Diethyl diSulfur compounds	Sulfur compounds	110-81-6	9	9	9	71046.5	86071.3	87819.7	1.06494	0.0042256	9071.76	13.1472	up
XMW0240	C10H22	3-Ethyl-3-methylheptane	Hydrocarbons	17302-01-1	16672.3	26406.5	11157.8	943250	1.06636e+06	1.09347e+06	1.05717	0.0019014	57.2137	5.83829	up
NMW0781	C4H8O3	Butanoic Acid, 4-hydroxy-	Acid	591-81-1	4534.08	6900.03	7228.88	60826.6	69472.1	75244.5	1.05562	0.00336454	11.0134	3.46119	up
NMW0783	C10H16	(1S)-2,6,6-Trimethylbicyclo[3.1.1]hept-2-ene	Terpenoids	7785-26-4	299277	187086	175082	8.09413e+06	1.03161e+07	1.1673e+07	1.05948	0.0110385	45.4811	5.50719	up
WMW0099	C9H16	Cyclopentene, 1-butyl-	Hydrocarbons	2423-01-0	19757.4	16014.8	12605.1	433097	551192	618817	1.06042	0.010703	33.1375	5.05039	up
D447	C8H16O2	Pentanoic acid, 2-methyl-, ethyl ester	Ester	39255-32-8	9	9	9	87804	103445	107254	1.06497	0.00355855	11055.7	13.4325	up
XMW0651	C7H9N	Pyridine, 2,3-dimethyl-	Heterocyclic compound	583-61-9	10928.7	6749.31	9127.83	57794	73278.6	79035.3	1.05115	0.00871645	7.83814	2.97051	up
XMW0004	C10H16	Bicyclo[3.1.1]heptane, 6,6-dimethyl-2-methylene-, (1S)-	Terpenoids	18172-67-3	34905	20389.4	24671.3	176196	215657	235466	1.04973	0.00638864	7.84486	2.97175	up
XMW0889	C10H14	Bicyclo[3.1.0]hex-2-ene, 4-methylene-1-(1-methylethyl)-	Terpenoids	36262-09-6	10093.4	8403.47	4802.49	167131	175206	186105	1.0547	0.000487088	22.6806	4.50338	up
D350	C6H10O2	2-Pentenoic Acid, 2-methyl-	Acid	3142-72-1	43002.3	20785	22385.6	6.34085e+06	7.17035e+06	7.65168e+06	1.06133	0.00294777	245.586	7.94009	up
D181	C3H8O3	Glycerin	Alcohol	56-81-5	191.393	186.513	313.864	25118.7	29693.4	32025	1.06194	0.00493823	125.529	6.97188	up
KMW0164	C8H16O2	Pentanoic acid, 4-methyl-, ethyl ester	Ester	25415-67-2	9	9	9	80832.2	88773.2	98585.9	1.06502	0.0032832	9933.01	13.278	up
NMW0791	C9H12	Benzene, 1-ethyl-2-methyl-	Aromatics	611-14-3	17477.8	13130.7	10307.2	3.43632e+06	4.17862e+06	4.48662e+06	1.06323	0.00595653	295.768	8.20832	up
KMW0169	C5H12OS	3-Mercapto-3-methylbutanol	Alcohol	34300-94-2	43659	19454.5	25735.1	6.30358e+06	7.26876e+06	7.81134e+06	1.06102	0.00382838	240.675	7.91094	up
KMW0168	C8H14O	5-Methyl-(E)-2-hepten-4-one	Ketone	102322-83-8	44123.2	25710.5	30424.9	6.75577e+06	8.01522e+06	8.70285e+06	1.06295	0.00530804	234.133	7.87118	up
KMW0178	C10H16	Bicyclo[3.1.0]hexane, 4-methylene-1-(1-methylethyl)-	Terpenoids	3387-41-5	849493	406168	500664	1.28722e+08	1.52265e+08	1.645e+08	1.06153	0.00499464	253.647	7.98668	up
WMW0226	C5H4O2	4H-Pyran-4-one	Heterocyclic compound	108-97-4	9	9	9	70250.3	88297.5	97981.6	1.06484	0.00891159	9501.09	13.2139	up
XMW0181	C9H16O	5-Hepten-2-one, 4,6-dimethyl-	Ketone	31162-48-8	5664.02	2673	2596.5	975961	1.18616e+06	1.29262e+06	1.0607	0.00649906	315.978	8.30368	up
D374	C10H18	(-)-trans-Pinane	Terpenoids	33626-25-4	6233.17	4098.65	5087.7	1.11052e+06	1.3313e+06	1.44285e+06	1.06368	0.00568181	251.932	7.97689	up
KMW0144	C7H14O2	Hexanoic acid, methyl ester	Ester	106-70-7	324.389	859.856	775.037	306880	382076	397031	1.05966	0.00590503	554.278	9.11447	up
XMW0301	C9H12	Mesitylene	Aromatics	108-67-8	14905.6	11982.1	11169.5	3.4894e+06	4.17862e+06	4.54393e+06	1.06426	0.00575404	320.884	8.32591	up
XMW0910	C5H6N2O	1H-Imidazole, 1-acetyl-	Heterocyclic compound	2466-76-4	5684.61	4913.33	3734.69	45067.7	53551	58792.2	1.05755	0.00613151	10.9827	3.45716	up
KMW0182	C9H14O	Furan, 2-pentyl-	Heterocyclic compound	3777-69-3	849189	700144	669447	91436.1	125416	118738	1.05652	0.00626162	0.15125	-2.72499	down
KMW0188	C4H8S2	2-Methyl-1,3-dithiacyclopentane	Heterocyclic compound	5616-51-3	14761.7	10659.8	11348.4	461266	495307	531918	1.06338	0.00171153	40.4812	5.33918	up
WMW0081	C9H12O	cis-2-(2-Pentenyl)furan	Heterocyclic compound	70424-13-4	1.50579e+06	1.07156e+06	1.14991e+06	226353	283313	260480	1.05248	0.0166991	0.206625	-2.27491	down
XMW0416	C10H16	1,3-Cyclohexadiene, 5-butyl-	Hydrocarbons	30168-57-1	6.8123e+06	4.56645e+06	5.08146e+06	26066.6	20069.1	18981.5	1.06335	0.0150984	0.00395603	-7.98173	down
KMW0235	C10H16	1,3,6-Octatriene, 3,7-dimethyl-, (Z)-	Terpenoids	3338-55-4	13447048	9.00792e+06	9.95971e+06	9	9	9	1.0649	0.0152402	8.32956e-07	-20.1953	down
XMW0149	C5H10N2	1H-Pyrazole, 4,5-dihydro-5,5-dimethyl-	Heterocyclic compound	4320-85-8	1.67128e+06	1.7474e+06	1.41831e+06	271204	296355	264657	1.06165	0.00516514	0.172053	-2.53908	down
NMW0010	C10H12	Dicyclopentadiene	Hydrocarbons	77-73-6	585126	425662	443505	12340	17026.1	13424.6	1.06202	0.0112524	0.0294237	-5.08688	down
KMW0278	C6H6OS	Ethanone, 1-(2-thienyl)-	Heterocyclic compound	88-15-3	109056	216519	111430	22172.7	27783.9	20878.8	1.02829	0.0744077	0.162093	-2.62511	down
KMW0321	C8H14O2	Cyclohexanecarboxylic acid, methyl ester	Ester	4630-82-4	33681.2	13601.3	19630.9	430158	448435	488743	1.04981	0.000568592	20.4344	4.35293	up
XMW0585	C6H9NO3	5-Isoxazolecarboxylic acid, 4,5-dihydro-5-methyl-, methyl ester, (R)-	Heterocyclic compound	64018-42-4	12106.1	6273.81	13648.2	140079	149659	158918	1.04793	0.000361131	14.0082	3.8082	up
XMW0276	C7H12O	4-Hexen-3-one, 5-methyl-	Ketone	13905-10-7	8781.06	4964.61	5299.88	1096.03	673.211	709.69	1.03655	0.0439997	0.130158	-2.94166	down
KMW0176	C8H14O	5-Hepten-2-one, 6-methyl-	Ketone	110-93-0	1.13249e+07	1.1864e+07	9.55822e+06	1.82046e+06	2.09609e+06	2.00276e+06	1.06076	0.0054971	0.180758	-2.46786	down
XMW0100	C11H24	Octane, 5-ethyl-2-methyl-	Hydrocarbons	62016-18-6	2.59055e+06	2.68858e+06	2.18033e+06	429121	476085	454721	1.0614	0.00552346	0.182309	-2.45554	down
XMW0121	C12H24	1-Nonene, 4,6,8-trimethyl-	Hydrocarbons	54410-98-9	3172.57	919.449	4575.75	129729	130343	118382	1.03431	0.000474078	43.6622	5.44831	up
XMW0310	C6H12O2	2H-Pyran-2-methanol, tetrahydro-	Heterocyclic compound	100-72-1	34114.4	36156.8	43963.6	8893.73	4473.46	10877.4	1.00423	0.00219681	0.212235	-2.23627	down
KMW0241	C7H10N2	Pyrazine, 2-ethyl-3-methyl-	Heterocyclic compound	15707-23-0	869691	609924	640186	2.66107e+06	3.75165e+06	3.80649e+06	1.04331	0.0151033	4.82083	2.26928	up
KMW0244	C8H12N2	Pyrazine, 2-methyl-5-(1-methylethyl)-	Heterocyclic compound	13925-05-8	259573	160780	186030	3.14227e+06	3.66757e+06	3.90616e+06	1.05904	0.0039354	17.672	4.14339	up
D373	C7H12O	2,4-Heptadien-1-ol, (E,E)-	Alcohol	33467-79-7	79734.6	112825	74349.8	27971.2	31476.7	33370.1	1.02893	0.0383766	0.347751	-1.52387	down
XMW0522	C8H11N	Pyridine, 3-propyl-	Heterocyclic compound	4673-31-8	5.68851e+06	3788193	4.20594e+06	89345.7	105312	107855	1.06234	0.0162964	0.0221092	-5.49921	down
KMW0223	C10H16	1,3-Cyclohexadiene, 1-methyl-4-(1-methylethyl)-	Terpenoids	99-86-5	892226	570674	656065	2.70006e+06	3.79852e+06	3.8533e+06	1.03992	0.0138147	4.88535	2.28846	up
NMW0012	C9H12	Benzene, 1,2,3-trimethyl-	Aromatics	526-73-8	197831	171209	152470	483887	674548	677347	1.04124	0.0174206	3.52013	1.81563	up
XMW0598	C9H10	.alpha.-Methylstyrene	Aromatics	98-83-9	1449.72	1330.95	971.53	13299.4	14558.1	13690.1	1.05951	0.000204579	11.0728	3.46895	up
KMW0184	C6H9NS	Thiazole, 2,4,5-trimethyl-	Heterocyclic compound	13623-11-5	7347.84	6247.34	7457.45	9	9	9	1.06492	0.00302584	0.0012825	-9.60683	down
XMW1209	C9H18O2	Propanoic acid, 2-methyl-, 2-methylbutyl ester	Ester	2445-69-4	59306	58552.7	35379.6	970127	1.08336e+06	1.14601e+06	1.05822	0.00211268	20.8792	4.384	up
XMW0774	C9H18O2	3-Hexene, 1-(1-methoxyethoxy)-, (Z)-	Hydrocarbons	54340-96-4	434.141	133.591	419.281	5641.74	5147.16	6053.81	1.03013	0.000833805	17.0643	4.09291	up
XMW1193	C7H16O2	1,2-Hexanediol, 2-methyl-	Alcohol	56255-50-6	8847.79	5905.2	5961.34	2438.09	2341.32	2637.7	1.02679	0.0438494	0.358067	-1.4817	down
XMW0658	C7H12O2	2-Heptenoic Acid	Acid	18999-28-5	10817.2	5011.12	4322.33	9	9	9	1.06092	0.0827542	0.00133991	-9.54365	down
XMW1332	C8H14O2	2,2'-Bifuran, octahydro-	Heterocyclic compound	1592-33-2	87844.8	66422.4	62100.7	141781	157034	173104	1.0189	0.00224105	2.1811	1.12505	up
KMW0160	C4H10OS	1-Propanol, 3-(methylthio)-	Alcohol	505-10-2	6683.79	2609.55	7238.58	42119.5	53486.7	59085.1	1.0214	0.00752218	9.35713	3.22607	up
WMW0040	C10H16	trans-.beta.-Ocimene	Terpenoids	3779-61-1	1.9073e+07	1.28093e+07	1.42673e+07	53743	41854.7	39465.1	1.06357	0.0148813	0.00292662	-8.41655	down
KMW0250	C10H20O	7-Octen-2-ol, 2,6-dimethyl-	Terpenoids	18479-58-8	3602.78	4211.32	3637.28	6684.38	7592.8	8933.66	1.02635	0.0195312	2.0269	1.01928	up
XMW0659	C10H14	Benzene, n-butyl-	Aromatics	104-51-8	395536	269693	287139	4.53555e+06	5.32353e+06	5.61125e+06	1.06027	0.00393632	16.2441	4.02184	up
NMW0793	C5H10O3	Butanoic Acid, 3-hydroxy-3-methyl-	Acid	625-08-1	8455.15	4225.19	6602.2	1.27968e+06	1.51807e+06	1.65494e+06	1.06181	0.00545491	230.918	7.85124	up
KMW0175	C6H6O	Phenol	Phenol	108-95-2	288790	233207	300509	934661	960964	876204	1.05498	4.7955e-05	3.36998	1.75274	up
XMW1204	C5H10O2S	Ethyl (methylthio)acetate	Ester	4455-13-4	23622.7	16941.9	19059.8	2563.41	4206.16	4479.64	1.03602	0.00962861	0.188668	-2.40608	down
WMW0127	C8H16O	3-Octen-1-ol, (Z)-	Alcohol	20125-84-2	14080.7	14181.6	12240.7	160373	179458	182602	1.06382	0.00173158	12.8986	3.68915	up
WMW0227	C6H4Cl2	Benzene, 1,4-dichloro-	Aromatics	106-46-7	8925	3133.84	9281	492622	494201	464119	1.05087	0.000258091	67.9922	6.0873	up
KMW0199	C10H16	.beta.-Myrcene	Terpenoids	123-35-3	1.14552e+07	7.88097e+06	8.68569e+06	174451	205978	197060	1.06296	0.0137097	0.0206085	-5.60061	down
KMW0252	C10H16	1,3,7-Octatriene, 3,7-dimethyl-	Terpenoids	502-99-8	1.8938e+07	1.27906e+07	1.41579e+07	53702.9	37545	31134	1.06269	0.0145967	0.00266706	-8.55054	down
XMW1308	C10H17F3O2	1-Octyl trifluoroacetate	Ester	2561-21-9	8899.13	9355.22	6589.28	62567	71369	69946	1.05868	0.000921315	8.20661	3.03679	up
XMW0091	C10H16O	3-Isopropylidene-5-methyl-hex-4-en-2-one	Ketone	64149-32-2	1.86938e+07	1.82731e+07	1.91051e+07	470841	471751	426213	1.06497	0.000164395	0.0244116	-5.35629	down
XMW0127	C10H14	o-Cymene	Terpenoids	527-84-4	190736	141604	146904	4.88984e+06	5.23945e+06	5.67463e+06	1.06335	0.00188868	32.9768	5.04338	up
KMW0243	C8H14O	(E)-2-Octenal	Aldehyde	2548-87-0	26275.4	21697.2	17908.4	333408	390704	403918	1.06107	0.00338078	17.1222	4.0978	up
D206	C6H8O2	1,2-Cyclohexanedione	Ketone	765-87-7	56431.6	36685.6	51624.1	149214	158821	160826	1.0394	0.000343862	3.23931	1.69569	up
NMW0029	C8H8O2	Formic acid, phenylmethyl ester	Ester	104-57-4	38520.2	52424.3	28001.3	9	9	9	1.06404	0.030393	0.000226994	-12.1051	down
XMW0412	C8H10O2	3-Acetyl-2,5-dimethyl furan	Heterocyclic compound	10599-70-9	683063	673542	690806	65520.1	63240.9	61147.2	1.06494	2.43493e-05	0.0927553	-3.43043	down
w43	C6H10O2	2-Oxepanone	Ester	502-44-3	4830.42	3946.37	3401.98	15493.1	12715.5	17789.4	1.04313	0.0116361	3.7769	1.9172	up
KMW0255	C7H10N2O	3-Methoxy-2,5-dimethylpyrazine	Heterocyclic compound	19846-22-1	4041.02	3355.23	3569.54	29150.2	33199.9	35917	1.06221	0.00420151	8.96124	3.1637	up
XMW0729	C11H18	Cyclohexane, 2-ethenyl-1,1-dimethyl-3-methylene-	Hydrocarbons	95452-08-7	34437.3	30187.5	29165.8	105505	113207	123348	1.05953	0.00194457	3.64706	1.86673	up
XMW0039	C8H14O	Cycloheptanone, 3-methyl-	Ketone	933-17-5	33930.7	27979.8	29165.8	105626	110199	119555	1.05944	0.000594677	3.68241	1.88065	up
XMW1305	C9H18O2	Ethyl 5-methylhexanoate	Ester	10236-10-9	492	239.675	281.672	22574.7	26282.4	23723.5	1.05948	0.00201251	71.6246	6.16238	up
XMW0037	C10H14	Benzene, 1-ethyl-3,5-dimethyl-	Aromatics	934-74-7	150345	110760	114308	1.06717e+06	1.17979e+06	1.20671e+06	1.06054	0.000807661	9.19967	3.20158	up
XMW0578	C8H16O	Furan, 2-butyltetrahydro-	Heterocyclic compound	1004-29-1	87981.3	48666.9	28547.7	962588	1.02802e+06	1.12061e+06	1.04148	0.000686834	18.8335	4.23523	up
XMW0226	C9H18O	2-Heptanone, 4,6-dimethyl-	Ketone	19549-80-5	110270	76389.7	83166.3	1680.98	1681.67	1831.5	1.06315	0.0134889	0.01925	-5.699	down
KMW0150	C9H12	Benzene, 1,2,4-trimethyl-	Aromatics	95-63-6	1.01541e+06	690713	746958	85349.3	114695	104502	1.05483	0.0184082	0.124149	-3.00986	down
XMW0678	C10H16	1,3-Cyclohexadiene, 1,5,5,6-tetramethyl-	Terpenoids	514-94-3	50563	26791	30923.3	8.60377e+06	1.06056e+07	1.13844e+07	1.06225	0.00657328	282.55	8.14236	up
KMW0170	C8H14O	1-Octen-3-one	Ketone	4312-99-6	9	9	9	199978	108413	133781	1.06448	0.0326279	16376.8	13.9994	up
XMW0051	C6H5NO	4-Pyridinecarboxaldehyde	Heterocyclic compound	872-85-5	21275.3	11221.2	12510.7	3.64346e+06	4.37515e+06	4.53724e+06	1.06226	0.00431375	278.974	8.12399	up
XMW1192	C6H9ClO2	2-Propenoic acid, 2-methyl-, 2-chloroethyl ester	Ester	1888-94-4	59130.4	37704.9	35925.6	1.06386e+06	942917	1.18987e+06	1.05937	0.00447993	24.0782	4.58966	up
w09	C10H18	2,6-Octadiene, 2,6-dimethyl-	Hydrocarbons	2792-39-4	60887.1	37743.4	35925.6	885904	1.29161e+06	1.19205e+06	1.0567	0.0122948	25.042	4.64628	up
NMW0792	C6H4N2	4-Pyridinecarbonitrile	Heterocyclic compound	100-48-1	3191.5	1539.08	1657.09	493563	587447	645222	1.06122	0.00588402	270.244	8.07812	up
KMW0202	C8H18O	3-Octanol	Alcohol	589-98-0	18958.2	14176.4	15444	6402.98	7860.74	7527.63	1.02928	0.0176521	0.44858	-1.15656	down
KMW0193	C10H16	.beta.-Pinene	Terpenoids	127-91-3	315171	171571	169636	7.26893e+06	6.66944e+06	7.45954e+06	1.05807	0.000795448	32.6	5.0268	up
KMW0173	C8H16O	1-Octen-3-ol	Alcohol	3391-86-4	10813.3	11026.7	12910.2	1.14556e+06	1.13447e+06	1.13356e+06	1.06472	6.67687e-06	98.232	6.61812	up
XMW0299	C8H16O2	Butanoic acid, butyl ester	Ester	109-21-7	212414	236915	210108	17443	20569	12946.4	1.05937	0.000996275	0.0772755	-3.69385	down
XMW0306	C8H16O2	Heptanoic acid, methyl ester	Ester	106-73-0	9	9	9	15252.5	14922.4	14758.5	1.06507	9.41782e-05	1664.2	10.7006	up
WMW0086	C5H12S2	DiSulfur compounds, ethyl 1-methylethyl	Sulfur compounds	53966-36-2	2.11278e+06	1.40337e+06	1.56037e+06	25253.1	28087.1	30290.3	1.06273	0.0162981	0.016474	-5.92366	down
XMW0202	C10H18	cis-2,6-Dimethyl-2,6-octadiene	Hydrocarbons	2492-22-0	4.66956e+06	4.85062e+06	3.94571e+06	699155	752107	716983	1.06224	0.00523069	0.161017	-2.63471	down
XMW1454	C6H6O3	Isomaltol	Heterocyclic compound	3420-59-5	3.75953e+06	4.00262e+06	3.24392e+06	608062	672678	669867	1.06153	0.00512683	0.17723	-2.4963	down
w06	C12H26	Heptane, 2,2,4,6,6-pentamethyl-	Hydrocarbons	13475-82-6	64520.8	53996.3	55316.9	15546.5	13019	6343.05	1.01098	0.000502963	0.200815	-2.31606	down
XMW0902	C10H18	2,6-Dimethyl-2-trans-6-octadiene	Terpenoids	2609-23-6	1.83869e+07	1.26236e+07	1.39969e+07	249907	287463	334833	1.06224	0.0136572	0.0193791	-5.68935	down
KMW0181	C10H16O	2,3-Dehydro-1,8-cineole	Terpenoids	92760-25-3	282195	315757	205316	40557.8	46061.5	46194.1	1.05285	0.0204505	0.165341	-2.59648	down
WMW0058	C8H16O	5-Hepten-2-ol, 6-methyl-	Alcohol	1569-60-4	808869	793782	931907	115962	122545	114951	1.06365	0.00352004	0.139455	-2.84212	down
NMW0794	C10H14	Benzene, (1-methylpropyl)-	Aromatics	135-98-8	9	9	9	41682.3	45903	45147.4	1.06503	0.000861783	4916.02	12.2633	up
D324	C6H8N2O	Pyrazine, 2-methoxy-6-methyl-	Heterocyclic compound	2882-21-5	45207.7	57754.1	30538.3	7517.23	8479.63	8672.28	1.03771	0.0436672	0.184787	-2.43606	down
D455	C7H14O3	Pentanoic acid, 2-hydroxy-4-methyl-, methyl ester	Ester	40348-72-9	1.85242e+07	1.26712e+07	1.39969e+07	266458	279405	274896	1.06329	0.0140494	0.0181615	-5.78297	down
XMW0177	C8H12O	Ethanone, 1-(2-methyl-1-cyclopenten-1-yl)-	Ketone	3168-90-9	251690	305377	203623	37663.8	49649.2	49325.9	1.04949	0.0179384	0.179625	-2.47694	down
XMW1133	C10H16O	5-Isopropyl-3,3-dimethyl-2-methylene-2,3-dihydrofuran	Heterocyclic compound	81250-44-4	498088	496310	361422	4160.74	5219.37	4713.7	1.06353	0.0100846	0.010395	-6.58796	down
KMW0187	C8H16O	2-Octanone	Ketone	111-13-7	53654.1	57213.9	78234.4	19588.2	22404.2	22373.7	1.03753	0.0308097	0.340377	-1.5548	down
KMW0192	C8H10O	Benzene, 1-methoxy-2-methyl-	Ether	578-58-5	165612	159103	132729	926622	1.09962e+06	1.06289e+06	1.06077	0.00272079	6.75303	2.75553	up
WMW0103	C7H14O	2-Cyclopentylethanol	Alcohol	766-00-7	857488	1.10152e+06	624840	25703.6	25157.2	28317.3	1.05988	0.0261062	0.0306434	-5.02828	down
D269	C9H18O2	Butanoic acid, 2-methyl-, 2-methylpropyl ester	Ester	2445-67-2	17852	14000.3	17180.4	195920	214947	226465	1.0627	0.00176139	12.9981	3.70023	up
D417	C8H14O2	3-Hexen-1-ol, acetate, (E)-	Ester	3681-82-1	316360	384613	232976	23483.8	25735.9	26378.5	1.05733	0.0226516	0.0809446	-3.62692	down
XMW0712	C9H8	Benzene, 1-propynyl-	Aromatics	673-32-5	202618	137744	156299	9	9	9	1.06477	0.0133084	5.43629e-05	-14.167	down
XMW0409	C7H8O2	1-Propanone, 1-(2-furanyl)-	Heterocyclic compound	3194-15-8	108814	122995	97710.9	38843.7	43039.3	46127.8	1.04869	0.00769114	0.388477	-1.3641	down
XMW0042	C2H3N3O	3H-1,2,4-Triazol-3-one, 1,2-dihydro-	Heterocyclic compound	930-33-6	4151.35	1775.79	4423.45	31674.5	34199.9	33750.1	1.03263	1.37453e-05	9.625	3.26679	up
KMW0205	C7H12O	Cyclohexene, 1-methoxy-	Aromatics	931-57-7	2279.68	1319.38	1537.42	14070.9	14512.8	13609.2	1.05277	6.64361e-06	8.21435	3.03815	up
XMW0898	C8H12N2	4-Isobutylpyrimidine	Heterocyclic compound	98489-37-3	93567.1	82417.5	81730.6	195390	275594	277137	1.03677	0.024306	2.9029	1.53749	up
WMW0210	C8H14O2	2-Hexen-1-ol, acetate, (E)-	Ester	2497-18-9	1039.17	859.008	1312.62	9800.56	10255.1	11891.6	1.05785	0.0032148	9.94993	3.31469	up
NMW0013	C7H9N	Benzylamine	Amine	100-46-9	52676.6	47341.5	42990.9	117204	159878	162364	1.04065	0.0183728	3.07285	1.61958	up
XMW1070	C4H6O4	Acetic Acid, (acetyloxy)-	Acid	13831-30-6	7104.67	3569.3	8740.12	63240.9	70356.4	64204.6	1.03805	6.50864e-05	10.1886	3.34888	up
KMW0234	C10H14	p-Cymene	Aromatics	99-87-6	179239	138145	143246	4.94465e+06	5.30136e+06	5.73763e+06	1.06375	0.00190362	34.6994	5.11684	up
XMW1221	C6H12O2S	Acetic acid, (propylthio)-, methyl ester	Ester	20600-65-1	17973.8	15207	17658.4	9	9	9	1.06497	0.0026549	0.000531085	-10.8788	down
WMW0215	C10H16	.beta.-Ocimene	Terpenoids	13877-91-3	1.26824e+07	8.32508e+06	9.46827e+06	9	9	9	1.06489	0.0160892	8.85951e-07	-20.1063	down
KMW0229	C9H18O2	Hexanoic acid, 1-methylethyl ester	Ester	2311-46-8	121248	79975.1	85069.8	17984.3	19642.4	20872.9	1.04908	0.0276278	0.204334	-2.291	down
XMW0011	C10H14	Benzene, 1,4-diethyl-	Aromatics	105-05-5	499515	334060	369525	9	9	9	1.06478	0.0153669	2.2442e-05	-15.4434	down
XMW0076	C5H4N2	1H-Pyrrole-3-carbonitrile	Heterocyclic compound	7126-38-7	5.06597e+06	3.40268e+06	3.77504e+06	9	9	9	1.06488	0.0149082	2.20522e-06	-18.7906	down
XMW0523	C5H4N2	1H-Pyrrole-2-carbonitrile	Heterocyclic compound	9513-94-4	7762.29	8993.36	18230.8	403110	370417	328749	1.05244	0.00304619	31.5058	4.97754	up
KMW0240	C6H7NO	Ethanone, 1-(1H-pyrrol-2-yl)-	Heterocyclic compound	1072-83-9	87501.3	59959.2	59317.4	889243	1.05356e+06	1.1108e+06	1.05918	0.00423962	14.7675	3.88436	up
D387	C9H20O	1-Hexanol, 3,5,5-trimethyl-	Alcohol	3452-97-9	53598	37363.5	40226.7	9	9	9	1.06469	0.012843	0.000205811	-12.2464	down
KMW0212	C8H8O	BenzeneacetAldehyde	Aldehyde	122-78-1	8.78218e+06	5.91804e+06	6.59966e+06	9	9	9	1.0649	0.0144817	1.26761e-06	-19.5895	down
XMW0281	C11H24	Decane, 5-methyl-	Hydrocarbons	13151-35-4	9	9	9	254517	302525	297163	1.06499	0.00283341	31637.2	14.9493	up
NMW0021	C6H8N2	2-PyridinemethanAmine	Heterocyclic compound	3731-51-9	43822.6	31819	32879.1	653595	771235	805491	1.06182	0.00399431	20.552	4.36121	up
XMW0490	C10H12	1-Methyl-2-phenylcyclopropane	Aromatics	3145-76-4	29587.4	20579.9	21966.3	259236	291551	306857	1.06007	0.00208592	11.8897	3.57164	up
XMW1203	C5H6O3	2,5-Furandione, dihydro-3-methyl-	Heterocyclic compound	4100-80-5	2315.85	3040.37	2580.36	29696.9	31821	34305	1.06238	0.00165488	12.0736	3.59378	up
NMW0022	C8H10O	Benzenemethanol, .alpha.-methyl-	Alcohol	98-85-1	131755	128201	129229	1.67698e+06	1.9725e+06	2.07211e+06	1.06384	0.00442341	14.7015	3.87789	up
XMW0672	C3H3N3O2	1,2,4-Triazine-3,5(2H,4H)-dione	Heterocyclic compound	461-89-2	4830.42	3946.37	6880.14	12913.5	13308.4	15200.7	1.0081	0.00183003	2.64564	1.40362	up
KMW0276	C8H18O	1-Octanol	Alcohol	111-87-5	8380.4	8316.11	13753.5	127177	141534	136073	1.05598	0.000212586	13.2934	3.73264	up
XMW0186	C8H12O	3,5-Octadien-2-one, (E,E)-	Ketone	30086-02-3	62954.5	87656.7	73506.2	228947	224641	216240	1.04877	0.000341065	2.98874	1.57954	up
KMW0259	C10H16	.gamma.-Terpinene	Terpenoids	99-85-4	798263	545521	585401	9.49473e+06	1.11311e+07	1.17473e+07	1.06048	0.00394952	16.7807	4.06873	up
D306	C10H18O	1,5-Heptadien-4-ol, 3,3,6-trimethyl-	Terpenoids	27644-04-8	1148.63	1483.23	1510.68	9	9	9	1.06447	0.00712002	0.00651773	-7.26142	down
XMW0528	C8H12S	Thiophene, 2-butyl-	Heterocyclic compound	1455-20-5	11238.1	7919.34	8246.88	20501.1	20701.6	23177	1.02861	0.000993082	2.34926	1.2322	up
XMW0168	C8H12S	3-Butylthiophene	Heterocyclic compound	34722-01-5	9	9	9	3162.19	3749.28	4441.08	1.06457	0.00944909	420.465	8.71584	up
KMW0291	C10H18O	Linalool	Terpenoids	78-70-6	9.33873e+07	9.10727e+07	9.5382e+07	1.53546e+06	1.59847e+06	1.61584e+06	1.06503	0.000183371	0.0169731	-5.88061	down
KMW0294	C8H16O	2-Octen-1-ol, (E)-	Alcohol	18409-17-1	4759.61	6590.04	6077.32	92651.6	98441.9	104737	1.06219	0.00112137	16.9754	4.08538	up
KMW0297	C10H18O2	trans-Linalool oxide (furanoid)	Heterocyclic compound	34995-77-2	219564	423839	223186	49999.1	55279.4	52213.3	1.02998	0.0726821	0.181737	-2.46007	down
KMW0426	C7H5N	Benzonitrile	Nitrogen compounds	100-47-0	255565	171844	197275	9206.01	11959.7	11168.5	1.06039	0.0153082	0.0517609	-4.27199	down
XMW3734	C7H6O2	2-hydroxy-BenzAldehyde	Aldehyde	90-02-8	379799	258902	289489	2138.36	3021.78	3727.69	1.06115	0.0137267	0.00957544	-6.70645	down
XMW0670	C4H5N3	Acetonitrile, 2,2'-iminobis-	Nitrogen compounds	628-87-5	30779	22252.2	26651.4	470774	498086	501427	1.06282	0.000208626	18.4518	4.20569	up
D389	C12H20O2	(S)-3,3,6-Trimethylhepta-1,5-dien-4-yl acetate	Ester	3465-88-1	9	9	9	1.93598e+06	2.20377e+06	2.20327e+06	1.06504	0.00177437	234927	17.8419	up
KMW0319	C10H16O	7-Oxabicyclo[4.1.0]heptane, 1-methyl-4-(1-methylethenyl)-	Terpenoids	1195-92-2	192328	139486	170097	1.62941e+07	1.67665e+07	1.6869e+07	1.06421	0.000103581	99.4792	6.63632	up
XMW0717	C9H10O	Ethanone, 1-(2-methylphenyl)-	Ketone	577-16-2	18671.4	12693	17087.2	90763.1	96450.8	94238.9	1.05571	6.11039e-06	5.80894	2.53828	up
XMW1069	C10H18O2	Butanoic acid, 3-hexenyl ester, (E)-	Ester	53398-84-8	45310	32335.5	27674	1.48811e+06	1.49366e+06	1.45501e+06	1.062	4.54634e-06	42.127	5.39667	up
XMW0689	C8H10N2O	Ethanone, 1-(3,5-dimethylpyrazinyl)-	Heterocyclic compound	54300-08-2	23671.1	31317.3	19740.1	749309	730783	704571	1.06173	0.000149127	29.2347	4.86961	up
KMW0608	C6H14OS	3-Mercaptohexanol	Alcohol	51755-83-0	975067	709266	850034	55140512	57560830	57929400	1.06405	0.000220394	67.3268	6.07311	up
XMW1057	C4H7NO	Methacrylamide	Amine	79-39-0	9	9	9	20974	21593.3	24802.3	1.06503	0.00278193	2495.17	11.2849	up
KMW0277	C9H14S	Thiophene, 2-pentyl-	Heterocyclic compound	4861-58-9	23524.5	22238.6	24682.1	204807	220566	217107	1.06438	0.000494062	9.12029	3.18908	up
w48	C10H18O	2H-Pyran, tetrahydro-4-methyl-2-(2-methyl-1-propenyl)-	Terpenoids	16409-43-1	4.03738e+06	3.95401e+06	4.10999e+06	265536	269584	269736	1.06504	0.000141306	0.0665095	-3.9103	down
WMW0048	C9H16O	6-Nonenal, (E)-	Aldehyde	2277-20-5	1.11557e+06	815555	976148	6.62176e+07	6.91809e+07	6.95215e+07	1.0641	0.000222038	70.4852	6.13925	up
XMW0676	C9H10O	Ethanone, 1-(3-methylphenyl)-	Ketone	585-74-0	18945.7	15525	15239.9	187005	184929	177489	1.06324	4.17019e-05	11.0524	3.46629	up
XMW0681	C10H16O	6-Octenal, 7-methyl-3-methylene-	Aldehyde	55050-40-3	37028.7	60322.5	58875.4	185103	196035	194984	1.03515	0.000648367	3.68773	1.88273	up
XMW0274	C5H7NO3	3-Acetyl-2-oxo-1,3-oxazolidine	Heterocyclic compound	1432-43-5	1569.47	2795.62	1565.02	15458.2	17128.4	15581.3	1.04742	5.27743e-05	8.12259	3.02194	up
XMW0442	C8H12N2	Betahistine	Heterocyclic compound	5638-76-6	197711	143338	123544	5655499	5661958	5521299	1.06203	2.74449e-06	36.2441	5.17967	up
XMW0452	C10H16	2,4,6-Octatriene, 3,4-dimethyl-	Hydrocarbons	57396-75-5	13606.5	11900.4	14571.2	1.68057e+06	1.70982e+06	1.69163e+06	1.06473	2.22401e-05	126.803	6.98645	up
XMW0411	C8H16O	Cyclohexanol, 2,6-dimethyl-	Alcohol	5337-72-4	92408685	89894045	94252296	3.02494e+06	3.14182e+06	3.13908e+06	1.06503	0.000198484	0.0336492	-4.89329	down
XMW1392	C11H16	2-Methyl-7-exo-vinylbicyclo[4.2.0]oct-1(2)-ene	Hydrocarbons	107914-89-6	9	9	9	838531	882621	892309	1.06507	0.0003607	96794.9	16.5626	up
XMW0907	C9H12O3	2-(2-Acetoxy-1-propyl)furan, (S)	Heterocyclic compound	60830-70-8	38499.9	35415	42802.9	518958	531679	526178	1.06405	6.54651e-07	13.5096	3.75592	up
XMW0914	C5H6N2O	Ethanone, 1-(1H-pyrazol-4-yl)-	Heterocyclic compound	25016-16-4	94614.2	71904.9	85893.6	906315	949680	946707	1.06264	2.10496e-05	11.1037	3.47296	up
KMW0342	C10H18O	Citronellal	Terpenoids	106-23-0	13786.2	16323.5	18796.7	236982	240305	248588	1.06261	2.80351e-05	14.8421	3.89163	up
KMW0373	C9H10O2	Benzoic acid, ethyl ester	Ester	93-89-0	27956.7	17103.6	23475.4	612860	656536	641558	1.06109	0.000216106	27.8826	4.80129	up
KMW0058	C10H18O2	2H-Pyran-3-ol, 6-ethenyltetrahydro-2,2,6-trimethyl-	Heterocyclic compound	14049-11-7	179445	298736	138874	3.39029e+06	3.68318e+06	3.60709e+06	1.05239	4.51836e-05	17.3089	4.11344	up
XMW0084	C10H16	2,4,6-Octatriene, 2,6-dimethyl-	Terpenoids	673-84-7	153017	99712.2	112776	9	9	9	1.06466	0.0168981	7.38705e-05	-13.7246	down
w32	C9H18O2	Acetic acid, heptyl ester	Ester	112-06-1	9	9	9	89058.1	67805.8	64351.5	1.06482	0.0107987	8193.16	13.0002	up
WMW0100	C9H18O	3-Nonen-1-ol, (E)-	Alcohol	10339-61-4	72151	79783	125763	1.48873e+06	1.53453e+06	1.51415e+06	1.05712	5.74676e-07	16.3394	4.03029	up
XMW1385	C6H7N3	3-Imidazol-1-ylpropanenitrile	Heterocyclic compound	23996-53-4	45851.7	62694.3	20886.4	1.61349e+07	1.77404e+07	1.73795e+07	1.05902	0.000807977	395.996	8.62934	up
WMW0061	C9H10O	BenzAldehyde, 2-ethyl-	Aldehyde	22927-13-5	1739.71	933.098	2005.59	8017.54	6443.84	6859.45	1.01692	0.00112319	4.5573	2.18818	up
XMW1409	C9H13N	(R)-(+)-1-(p-Tolyl)ethylAmine	Amine	4187-38-6	2264.8	1643.77	1477.41	23162.8	23113.2	23173.7	1.05998	0.000115423	12.8945	3.68869	up
NMW0041	C11H18	(E)-4,8-Dimethylnona-1,3,7-triene	Terpenoids	19945-61-0	176270	129561	102106	6.26587e+06	6.59428e+06	6.62802e+06	1.06166	0.000214251	47.7724	5.57811	up
KMW0324	C10H16O	Limonene oxide, cis-	Terpenoids	13837-75-7	191762	137257	168859	1.62146e+07	1.66864e+07	1.67902e+07	1.06413	0.000103951	99.806	6.64105	up
XMW1389	C9H12O	2,3-Dimethylanisole	Ether	2944-49-2	48726	35277.8	36714.7	281653	313313	301084	1.0592	0.000204047	7.42264	2.89193	up
KMW0348	C9H14N2	Pyrazine, 3,5-diethyl-2-methyl-	Heterocyclic compound	18138-05-1	9	9	9	24521.8	28304.1	26622.6	1.06498	0.00170359	2942.54	11.5228	up
D76	C10H22O2	Octanal dimethyl acetal	Ether	10022-28-3	1127.37	871.744	454.489	9054.02	9255.53	9125.49	1.04098	0.000205952	11.1815	3.48305	up
XMW0495	C6H8O2	Dehydromevalonic lactone	Ester	2381-87-5	50729.4	47639.6	49657.1	355233	372060	355300	1.06468	0.000233572	7.31353	2.87057	up
XMW1337	C13H28	Nonane, 3-methyl-5-propyl-	Hydrocarbons	31081-18-2	3092.69	2763.5	1408.64	118714	120548	115794	1.05706	2.25397e-05	48.8733	5.61097	up
w37	C10H16O	2-Cyclohexene-1-carboxaldehyde, 2,6,6-trimethyl-	Aldehyde	432-24-6	360410	212158	183927	1.56796e+07	1.64534e+07	1.65907e+07	1.06018	0.000198572	64.4072	6.00915	up
WMW0042	C10H16O	Bicyclo[3.1.1]heptan-3-ol, 6,6-dimethyl-2-methylene-	Terpenoids	5947-36-4	9	9	9	403362	422284	412072	1.06506	0.000175618	45841.4	15.4844	up
NMW0061	C7H7NO2	1-methyl-2-nitro-Benzene	Aromatics	88-72-2	9	9	9	115488	118448	118781	1.06507	7.92259e-05	13063.6	13.6733	up
D366	C9H16O	3-Octen-2-one, 7-methyl-	Ketone	33046-81-0	7512.82	6274.83	3294.89	275293	287954	269200	1.05669	0.000225882	48.7309	5.60676	up
XMW0529	C10H17Cl	Bicyclo[2.2.1]heptane, 2-chloro-1,7,7-trimethyl-, (1R-endo)-	Terpenoids	30462-53-4	218491	119568	103361	9.98228e+06	1.05293e+07	1.06648e+07	1.05922	0.000291434	70.6274	6.14216	up
D440	C10H20O	Cyclohexanol, 1-methyl-4-(1-methylethyl)-, cis-	Terpenoids	3901-95-9	9	9	9	153187	157700	150424	1.06505	0.000190148	17085.6	14.0605	up
NMW0052	C10H14O	2-Methyl-6-methyleneocta-2,7-dien-4-one	Terpenoids	539-70-8	39948.8	39754	68001.9	1.59737e+06	1.65821e+06	1.62936e+06	1.0595	3.65806e-06	33.0724	5.04755	up
KMW0338	C9H16O	2-Nonenal, (E)-	Aldehyde	18829-56-6	16759.4	22897.3	11560.5	703496	803132	792341	1.05929	0.00160642	44.8866	5.48821	up
XMW0913	C10H16O	cis-Chrysanthenol	Terpenoids	55722-60-6	34782.3	58778.4	25388.6	982555	1.04374e+06	1.03124e+06	1.0536	1.9132e-05	25.7046	4.68395	up
D112	C9H10O2	Benzeneacetic acid, methyl ester	Ester	101-41-7	100182	102158	75432.4	2.94617e+06	2.92053e+06	2.82624e+06	1.06339	7.97644e-05	31.2952	4.96787	up
D316	C10H16	Adamantane	Hydrocarbons	281-23-2	9	9	9	21328.2	24009	23735.7	1.06501	0.00136666	2558.25	11.3209	up
KMW0404	C10H8	Naphthalene	Aromatics	91-20-3	163036	100325	143546	475142	433269	425144	1.03395	0.000258499	3.2773	1.71251	up
KMW0232	C9H18O2	Octanoic acid, methyl ester	Ester	111-11-5	7502.82	4889.95	6160.94	690178	713350	718908	1.06365	0.00014209	114.394	6.83787	up
XMW0073	C10H20O2	3-Methylheptyl acetate	Ester	72218-58-7	1.18255e+06	864226	1.03704e+06	7.9105e+07	8.26026e+07	8.2657e+07	1.06415	0.00019672	79.2412	6.30818	up
D406	C10H16O	2,7-Octadien-4-ol, 2-methyl-6-methylene-, (S)-	Terpenoids	35628-00-3	6612.76	9506.71	9186.74	26257	29353.8	29578.4	1.04426	0.000167939	3.36633	1.75118	up
XMW1156	C9H13N	Cyclopentanecarbonitrile, 3-(1-methylethylidene)-	Nitrogen compounds	89683-72-7	109721	89869.1	121947	3.84237e+06	4.19933e+06	4.13434e+06	1.0636	0.000713313	37.8682	5.24292	up
XMW0607	C9H10O2	Formic acid, 2-phenylethyl ester	Ester	104-62-1	3590.53	5111.29	2884.53	23784.5	22461.3	22183.2	1.0472	3.81088e-05	5.906	2.56218	up
KMW0504	C9H10O	Benzene, 1-ethenyl-4-methoxy-	Aromatics	637-69-4	5537.71	5016.67	4374.47	65913.4	73246.7	69293.3	1.06335	0.000838417	13.9631	3.80355	up
KMW0669	C6H10O3	Pantolactone	Ester	599-04-2	9	9	9	100071	106235	106579	1.06506	0.00041074	11588.3	13.5004	up
WMW0221	C10H16O	Bicyclo[3.1.0]hexan-3-one, 4-methyl-1-(1-methylethyl)-	Terpenoids	1125-12-8	5.28864e+06	3.87236e+06	4.62457e+06	3.54648e+08	3.69888e+08	3.71142e+08	1.06417	0.000199661	79.4801	6.31252	up
KMW0329	C10H16O	Camphor	Terpenoids	76-22-2	51817	55936	95665.9	2.48299e+06	2.56238e+06	2.53646e+06	1.059	1.14798e-06	37.272	5.22002	up
KMW0340	C10H20O2	2-Octanol, acetate	Ester	2051-50-5	29721.7	20629.5	26509.7	2.54469e+06	2.58235e+06	2.60316e+06	1.06393	3.03187e-05	100.574	6.65211	up
KMW0266	C5H6S2	2-Thiophenemethanethiol	Heterocyclic compound	6258-63-5	3.69121e+06	3.61644e+06	3.78102e+06	236255	235419	226533	1.06503	0.000178054	0.0629658	-3.98929	down
NMW0035	C8H11N	BenzenAmine, N,N-dimethyl-	Amine	121-69-7	817762	802209	831505	10631	10837	9895	1.06505	0.000108207	0.0127935	-6.28845	down
NMW0036	C6H9NO	1-ethenyl-2-Pyrrolidinone	Heterocyclic compound	88-12-0	6.83083e+06	6.65159e+06	6.95432e+06	755993	831273	839190	1.06452	6.67151e-05	0.11873	-3.07424	down
WMW0194	C10H16O	Thujone	Terpenoids	546-80-5	444379	262911	220756	1.95411e+07	2.06165e+07	2.08301e+07	1.05996	0.000278823	65.7163	6.03818	up
XMW0726	C10H14O	Benzene, (1-methoxypropyl)-	Aromatics	59588-12-4	3.66997e+07	3.57614e+07	3.7563e+07	330122	297634	295944	1.06492	0.000203326	0.00839543	-6.89618	down
XMW0944	C11H18	Cyclohexene, 2-ethenyl-1,3,3-trimethyl-	Hydrocarbons	5293-90-3	463673	452887	472304	24073.4	29434	21583.8	1.06339	1.86628e-05	0.0540667	-4.20912	down
D401	C10H18O	2-Isopropyl-5-methylhex-2-enal	Aldehyde	35158-25-9	1.99106e+07	1.948e+07	2.02627e+07	1.2803e+06	1.32406e+06	1.32017e+06	1.06503	0.000140651	0.0657891	-3.92601	down
D271	C9H18O2	Propanoic acid, hexyl ester	Ester	2445-76-3	9	9	9	1.88418e+06	2.07125e+06	2.08899e+06	1.06505	0.00105572	223867	17.7723	up
XMW0527	C10H18O	2-Cyclohexen-1-ol, 1-methyl-4-(1-methylethyl)-, cis-	Alcohol	29803-82-5	12061.2	9060.17	6988.75	99263.5	108369	110781	1.05619	0.00028123	11.3274	3.50174	up
NMW0039	C6H14S2	DiSulfur compounds, dipropyl	Sulfur compounds	629-19-6	4474.79	2460.5	2419.61	47929.6	43109.2	44696.4	1.05349	0.000155931	14.5095	3.85893	up
XMW0531	C10H16O	Bicyclo[3.1.1]heptan-3-one, 2,6,6-trimethyl-, (1.alpha.,2.beta.,5.alpha.)-	Terpenoids	15358-88-0	180295	250318	164563	1.01534e+06	1.07748e+06	1.01133e+06	1.05248	2.27656e-05	5.21552	2.38281	up
WMW0014	C10H16O	Pinocamphone	Terpenoids	547-60-4	27737.9	36425.9	14796.5	2.55299e+06	2.78759e+06	2.73223e+06	1.0583	0.000647355	102.239	6.6758	up
KMW0308	C6H6OS	5-Methyl-2-thiophenecarboxaldehyde	Heterocyclic compound	13679-70-4	33271.9	24359.4	29702.4	2.98605e+06	3.11459e+06	3.13089e+06	1.06426	0.000216439	105.704	6.72389	up
KMW0310	C10H16O	2-Cyclohexen-1-ol, 1-methyl-4-(1-methylethenyl)-, trans-	Alcohol	7212-40-0	200019	145767	174310	1.63675e+07	1.68288e+07	1.69309e+07	1.06423	9.7483e-05	96.3804	6.59067	up
XMW0008	C9H14O	Isophorone	Ketone	78-59-1	1.22394e+06	890720	1.06304e+06	8.83394e+07	9.19716e+07	9.24408e+07	1.06417	0.000193242	85.8331	6.42346	up
XMW0892	C3H6N2O2	Propanediamide	Amine	108-13-4	4189.21	6609.63	4810.49	20821.6	16929.7	22307.5	1.03796	0.00461939	3.84762	1.94397	up
XMW0117	C8H16O	3,4-Dimethylcyclohexanol	Alcohol	5715-23-1	63100.1	43727.1	76822.5	4.86684e+06	5.03316e+06	5.06415e+06	1.06205	0.000110056	81.482	6.34841	up
XMW0300	C8H10O	Phenol, 3,5-dimethyl-	Phenol	108-68-9	15738.1	16370.5	21524.5	459291	487523	476890	1.06298	0.0001772	26.5453	4.73038	up
D141	C10H20O2	Acetic acid, 2-ethylhexyl ester	Ester	103-09-3	1.18827e+06	865819	1.03965e+06	7.91283e+07	8.2618e+07	8.26745e+07	1.06413	0.000195399	79.0052	6.30387	up
NMW0047	C8H10O	Phenol, 2-ethyl-	Phenol	90-00-6	9	9	9	345076	337963	314557	1.06504	0.00076775	36948	15.1732	up
XMW0941	C11H16	exo-7-(trans-1-Propenyl)bicyclo[4.2.0]oct-1(2)-ene	Hydrocarbons	107983-42-6	167477	140399	364348	1.09271e+07	1.13199e+07	1.11749e+07	1.05359	1.348e-06	49.7183	5.6357	up
WMW0159	C10H16O	(+)-(1R,4R,5R)-2-(10)-PINEN-4-OL	Terpenoids	13040-03-4	31988.9	30048.1	33219.1	482651	500690	490607	1.06475	8.28331e-05	15.4735	3.95173	up
NMW0048	C9H13N	DextroamphetAmine	Amine	51-64-9	5644.64	2287.02	4950.53	58315.8	62405	60705.5	1.04272	4.45375e-06	14.0835	3.81593	up
XMW0949	C10H18O	1-Decen-3-one	Ketone	56606-79-2	43687.1	37323.3	64015	1.72221e+06	1.77634e+06	1.76387e+06	1.06079	3.68378e-06	36.2862	5.18135	up
D329	C10H16O	Myroxide	Terpenoids	28977-57-3	190145	187195	211882	3.66388e+06	3.77984e+06	3.7445e+06	1.06462	4.43185e-05	18.9881	4.24703	up
XMW0814	C2H7N3S	2-Methyl-3-thiosemicarbazide	Others	21185-13-7	53824.5	38642.7	65756.7	1.19211e+06	1.23996e+06	1.21913e+06	1.05987	3.251e-06	23.0761	4.52833	up
XMW0925	C10H14O	Camphenone, 6-	Ketone	55659-42-2	9	9	9	748131	791046	794123	1.06507	0.000364091	86418.5	16.3991	up
XMW0253	C12H26	Undecane, 5-methyl-	Hydrocarbons	1632-70-8	9	9	9	1.04774e+06	1.16477e+06	1.12219e+06	1.06504	0.000945224	123508	16.9142	up
XMW0373	C12H26	Undecane, 2-methyl-	Hydrocarbons	7045-71-8	180884	309199	123467	1.00374e+06	1.05018e+06	1.01031e+06	1.01528	0.00276808	4.99426	2.32027	up
QWM0003	C10H16O	2H-Pyran, 3,6-dihydro-4-methyl-2-(2-methyl-1-propenyl)-	Terpenoids	1786-08-9	9	9	9	110071	129956	122476	1.06498	0.00229533	13426	13.7127	up
WMW0066	C9H18O	6-Nonen-1-ol, (E)-	Alcohol	31502-19-9	141388	200481	109100	4.04664e+06	4.40966e+06	4.3227e+06	1.05923	0.000375476	28.3368	4.8246	up
KMW0359	C8H10O	Phenol, 3-ethyl-	Phenol	620-17-7	32524.1	31346	42631.6	1.07339e+06	1.12959e+06	1.1997e+06	1.06319	0.00100308	31.9496	4.99772	up
KMW0360	C10H20O	Levomenthol	Terpenoids	2216-51-5	204331	418678	202770	1.26286e+06	1.3325e+06	1.29158e+06	1.02032	0.00288102	4.70701	2.23481	up
NMW0069	C8H11N	BenzenAmine, 2,5-dimethyl-	Amine	95-78-3	63394.8	35303	55595.9	1.85432e+06	2.04352e+06	1.99915e+06	1.05998	0.000712142	38.2192	5.25623	up
NMW0070	C9H8O2	1,2-Propanedione, 1-phenyl-	Ketone	579-07-7	9064.59	7665.81	5171.79	146537	144511	140158	1.05873	3.6466e-06	19.6878	4.29923	up
XMW1327	C9H20N2	Propanal, dipropylhydrazone	Amine	34687-35-9	9	9	9	4151.14	4001.02	4291.92	1.06509	0.000411494	460.892	8.84828	up
XMW0721	C10H14O	Benzene, 1-methoxy-4-propyl-	Aromatics	104-45-0	23249.1	17610.6	16905.8	408127	407692	395959	1.06284	4.06133e-06	20.9775	4.39077	up
XMW0719	C10H14	p-Mentha-1,5,8-triene	Terpenoids	21195-59-5	9	9	9	924013	986033	994738	1.06506	0.000528426	107585	16.7151	up
XMW1381	C10H14	Bicyclo[3.2.1]oct-2-ene, 3-methyl-4-methylene-	Terpenoids	49826-53-1	86355.1	85500.1	90876.2	1.73695e+06	1.83205e+06	1.7939e+06	1.06488	0.000252001	20.4121	4.35135	up
XMW0724	C12H18	Albene	Hydrocarbons	38451-64-8	28786	47870	18016.8	3.57965e+06	3.93455e+06	3.93333e+06	1.058	0.000919548	120.917	6.91787	up
XMW0175	C9H16O	2-Nonen-4-one	Ketone	32064-72-5	2337692	1692843	2054299	149779068	156206260	156686798	1.06407	0.00019498	76.0369	6.24863	up
XMW0361	C10H16O	5,7-Octadien-4-one, 2,6-dimethyl-, (E)-	Terpenoids	6752-80-3	51961.4	55936	95782.3	2.48277e+06	2.56216e+06	2.53634e+06	1.05901	1.14527e-06	37.2215	5.21806	up
KMW0273	C10H14	Benzene, 1,2,4,5-tetramethyl-	Aromatics	95-93-2	23105.9	18894	12135	86838.6	95352.7	91278.7	1.03767	8.56628e-05	5.05163	2.33675	up
KMW0287	C9H14O	(Z,Z)-3,6-Nonadienal	Aldehyde	21944-83-2	1.90171e+07	1.85872e+07	1.94404e+07	468534	432995	418696	1.06489	0.000167319	0.0231437	-5.43324	down
XMW1233	C8H16O	3-Cyclopentyl-1-propanol	Alcohol	767-05-5	1.90171e+07	1.85872e+07	1.94404e+07	468534	432995	436706	1.06493	0.000170943	0.0234594	-5.41369	down
XMW0410	C9H18O	1-Nonen-4-ol	Alcohol	35192-73-5	3.62469e+07	3.54853e+07	3.6901e+07	2.34856e+06	2.44685e+06	2.45854e+06	1.065	0.000132319	0.0667748	-3.90455	down
XMW0437	C10H16	1,5-Cyclooctadiene, 1,6-dimethyl-	Hydrocarbons	3760-13-2	1.31301e+07	1.28242e+07	1.34317e+07	243179	234306	195941	1.06461	0.000168313	0.0170981	-5.87002	down
NMW0038	C8H10O	Benzenemethanol, 4-methyl-	Alcohol	589-18-4	1.13958e+07	1.11488e+07	1.16595e+07	177338	162436	163340	1.06494	0.000169751	0.0147091	-6.08715	down
XMW0909	C10H14O	2,6,6-Trimethylbicyclo[3.2.0]hept-2-en-7-one	Ketone	4613-37-0	9	9	9	1683679	1772006	1781250	1.06507	0.000317207	193961	17.5654	up
XMW0690	C11H18	Cyclohexene, 2,4-dimethyl-1-(1-methylethenyl)-	Hydrocarbons	56763-60-1	9	9	9	641731	672767	669464	1.06507	0.000221375	73480.1	16.1651	up
NMW0040	C9H10O	Benzyl methyl ketone	Ketone	103-79-7	204952	207667	143332	4.96203e+06	5.11583e+06	5.12441e+06	1.06232	1.36143e-05	27.3447	4.77319	up
KMW0293	C8H12O	2,4-Octadienal, (E,E)-	Aldehyde	30361-28-5	354416	206352	185252	1.5738e+07	1.65158e+07	1.66545e+07	1.0604	0.00020517	65.5589	6.03472	up
XMW1311	C7H6O2	2-Propenal, 3-(2-furanyl)-	Heterocyclic compound	623-30-3	9	9	9	720177	767003	773687	1.06506	0.000498576	83735.8	16.3536	up
D313	C10H20O2	3-Hexene, 1-(1-ethoxyethoxy)-, (Z)-	Aldehyde	28069-74-1	891157	844921	960637	180261	194075	193756	1.06345	0.00191492	0.210661	-2.24701	down
D192	C10H18O	Fenchol	Terpenoids	1632-73-1	331470	187912	156575	1.57589e+07	1.65341e+07	1.66707e+07	1.05947	0.00019924	72.4361	6.17864	up
D392	C7H7NO	Ethanone, 1-(3-pyridinyl)-	Heterocyclic compound	350-03-8	9	9	9	26490.6	26249.1	28493.8	1.06509	0.000689998	3008.65	11.5549	up
XMW1127	C9H18O2	Formic acid, octyl ester	Ester	112-32-3	9	9	9	355823	470944	478926	1.06488	0.0082472	48359	15.5615	up
XMW1318	C8H8O2	2-Methyl-3(2-furyl)acrolein	Heterocyclic compound	874-66-8	1.48267e+07	1.44806e+07	1.51683e+07	193196	182107	193392	1.06496	0.000183071	0.0127866	-6.28922	down
KMW0304	C10H14	1,3,8-p-Menthatriene	Terpenoids	18368-95-1	270837	289125	182440	2.83377e+06	2.90669e+06	2.89482e+06	1.05807	1.34762e-06	11.6315	3.53997	up
XMW0932	C11H18	3-Nonen-5-yne, 4-ethyl-, (Z)-	Hydrocarbons	74744-26-6	297736	218327	246634	2.31124e+07	2.41227e+07	2.42817e+07	1.06424	0.000228618	93.7683	6.55103	up
XMW0918	C10H16O	Isocyclocitral	Aldehyde	1335-66-6	9	9	9	2.75163e+06	2.99428e+06	2.94753e+06	1.06506	0.000657254	321979	18.2966	up
XMW0798	C12H18	Benzene, 1,3-bis(1-methylethyl)-	Aromatics	99-62-7	9	9	9	24858.7	22133.4	23015.3	1.06507	0.00118252	2592.87	11.3403	up
XMW0449	C8H14O3	Butanoic acid, anhydride	Others	106-31-0	62980.9	43321.9	58599.8	4.86684e+06	5.03316e+06	5.06415e+06	1.0637	0.000135173	90.7454	6.50375	up
D173	C9H10O	BenzeneacetAldehyde, 4-methyl-	Aldehyde	104-09-6	45165	35145.5	40565	3.38706e+06	3.5247e+06	3.55621e+06	1.0645	0.000217561	86.6013	6.43632	up
XMW1399	C13H28	Decane, 2,5,9-trimethyl-	Hydrocarbons	62108-22-9	29911	19878	25203	1522326	1547762	1554656	1.06336	1.03918e-05	61.6698	5.94649	up
NMW0043	C10H14O	Bicyclo[3.1.1]hept-2-en-6-one, 2,7,7-trimethyl-	Terpenoids	473-06-3	169890	127665	148314	1.24644e+07	1.29899e+07	1.30756e+07	1.06435	0.000214621	86.4153	6.43321	up
KMW0312	C10H14O	Furan, 3-(4-methyl-3-pentenyl)-	Terpenoids	539-52-6	3.50302e+07	3.42324e+07	3.58176e+07	1.0678e+06	1.05511e+06	1.03037e+06	1.06505	0.000179947	0.0300084	-5.05849	down
NMW0044	C8H11N	BenzenAmine, N-ethyl-	Amine	103-69-5	13847.6	19154.8	9297.99	819733	853040	864532	1.05975	0.000147449	59.9829	5.90648	up
XMW0780	C10H14	2,6-Dimethyl-1,3,5,7-octatetraene, E,E-	Terpenoids	460-01-5	9	9	9	27576231	2.8638e+07	2.87392e+07	1.06507	0.00017247	3.14642e+06	21.5853	up
KMW0320	C9H16O2	Cyclohexanecarboxylic acid, ethyl ester	Ester	3289-28-9	39959.8	39719.2	69105.2	1.56976e+06	1.62373e+06	1.59463e+06	1.05909	1.06534e-06	32.1817	5.00817	up
WMW0015	C10H18O	Terpinen-4-ol	Terpenoids	562-74-3	244065	170887	151295	8.38879e+06	8.41734e+06	8.22697e+06	1.06216	1.97049e-06	44.2089	5.46626	up
KMW0325	C10H18O	3-Cyclohexen-1-ol, 1-methyl-4-(1-methylethyl)-	Terpenoids	586-82-3	119631	122098	190119	4.14006e+06	4.27133e+06	4.25929e+06	1.06073	2.38794e-06	29.3406	4.87482	up
XMW0068	C11H18O	2,7-Nonadien-5-one, 4,6-dimethyl-	Ketone	74630-80-1	276712	253119	198026	999013	1.01776e+06	1.00915e+06	1.05503	0.000535646	4.15731	2.05565	up
D167	C10H18O	1,7,7-Trimethylbicyclo[2.2.1]heptan-2-ol	Terpenoids	10385-78-1	86978.2	65191.7	74222.3	857497	887734	885834	1.06263	1.68581e-06	11.6217	3.53875	up
XMW0826	C7H6N2O	3-Methylisoxazolo[4,5-b]pyridine	Heterocyclic compound	83988-39-0	120988	110524	164242	2.06709e+06	2.14012e+06	2.11816e+06	1.06099	5.07247e-07	15.9831	3.99847	up
XMW0599	C7H10O3	2,2,6-Trimethyl-4H-1,3-dioxin-4-one	Heterocyclic compound	5394-63-8	276712	253119	198026	997095	1.01662e+06	1.00915e+06	1.05502	0.00050878	4.15311	2.05419	up
XMW0362	C8H14O2	2H-Pyran-2-one, tetrahydro-4,6,6-trimethyl-	Heterocyclic compound	20628-36-8	9	9	9	8203.86	8780.67	8149.45	1.06501	0.000581784	930.888	9.86246	up
KMW0327	C10H16O	Limonene oxide, trans-	Terpenoids	4959-35-7	37357.3	34503.1	40438.9	509167	521030	514461	1.06436	1.44916e-06	13.7548	3.78187	up
KMW0334	C10H18O	Cyclohexanone, 5-methyl-2-(1-methylethyl)-	Terpenoids	10458-14-7	6770.8	6242.58	7768.55	624166	682998	668433	1.06452	0.000731159	95.0633	6.57082	up
XMW0927	C9H12O2	2,6,6-Trimethyl-2-cyclohexene-1,4-dione	Ketone	1125-21-9	9	9	9	117751	129599	125393	1.06504	0.000778196	13805.3	13.7529	up
NMW0050	C8H7N	Benzyl nitrile	Nitrogen compounds	140-29-4	31685.5	39210.3	32515.2	480094	486623	489011	1.0637	2.85375e-08	14.0771	3.81528	up
D342	C10H16	2,4,6-Octatriene, 2,6-dimethyl-, (E,E)-	Terpenoids	3016-19-1	95080.6	68948	75150.8	355524	385759	375499	1.05652	1.81064e-05	4.66922	2.22318	up
XMW0657	C8H7NO	Benzoxazole, 2-methyl-	Heterocyclic compound	95-21-6	5008.32	3540.81	6849.41	133571	138365	137446	1.05797	1.19807e-06	26.5858	4.73258	up
D323	C6H8N2S	Pyrazine, 2-methyl-3-(methylthio)-	Heterocyclic compound	2882-20-4	1321.37	658.881	991.311	42328	41114	40933	1.05908	9.28806e-06	41.8551	5.38733	up
XMW1226	C10H20O2	Hexanoic acid, 2-methylpropyl ester	Ester	105-79-3	9	9	9	20544.4	25173.2	23525	1.0649	0.00342914	2564.54	11.3245	up
XMW0654	C10H16O	Ethanone, 1-(1,4-dimethyl-3-cyclohexen-1-yl)-	Terpenoids	43219-68-7	45811.8	34092.5	39564.1	361439	358672	355190	1.06194	3.17983e-06	9.00072	3.17004	up
NMW0053	C9H8O	2-Phenylpropenal	Aromatics	4432-63-7	1339.3	1092.77	1074.19	23311.1	24201.5	23598	1.0639	3.19484e-05	20.2811	4.34206	up
XMW0801	C12H18	Cyclohexene, 3,4-diethenyl-1,6-dimethyl-	Hydrocarbons	61142-14-1	32376.5	33357.2	117711	1.28792e+06	1.34471e+06	1.32224e+06	1.03025	2.12942e-05	21.5589	4.43021	up
KMW0343	C9H16O	2-Nonenal	Aldehyde	2463-53-8	15628.4	16985.6	8173.24	2.64544e+06	2.89846e+06	2.84747e+06	1.06119	0.00075916	205.736	7.68465	up
KMW0345	C9H14O	2,6-Nonadienal, (E,Z)-	Aldehyde	557-48-2	9	9	9	236479	244453	253674	1.06507	0.000411427	27207.6	14.7317	up
D412	C10H16O	5,7-Octadien-4-one, 2,6-dimethyl-, (Z)-	Terpenoids	3588-18-9	94867.7	71904.9	85535.8	915171	954242	954340	1.06265	1.17514e-05	11.1917	3.48435	up
NMW0058	C10H12	Naphthalene, 1,2,3,4-tetrahydro-	Aromatics	119-64-2	3089.36	4137.96	2576.67	85114.2	92968.7	89511.5	1.0613	0.000450555	27.2945	4.77054	up
NMW0059	C5H6N2	4-Aminopyridine	Heterocyclic compound	504-24-5	9	9	9	849865	936198	913600	1.06505	0.000824041	99987.5	16.6095	up
KMW0362	C10H18O	Isoborneol	Terpenoids	124-76-5	94614.2	71904.9	85893.6	878546	911601	911280	1.06261	3.39689e-06	10.7024	3.41987	up
KMW0351	C9H14N2	Pyrazine, 2,3-diethyl-5-methyl-	Heterocyclic compound	18138-04-0	2550.62	2232.19	3930.92	559594	610390	606827	1.06275	0.000762307	203.909	7.67178	up
XMW0679	C8H16O4	AcetAldehyde, tetramer	Aldehyde	108-62-3	9	9	9	65391.3	74534.8	71272.6	1.06501	0.00144145	7822.17	12.9334	up
XMW1137	C10H16O	Ethanone, 1-(1,3-dimethyl-3-cyclohexen-1-yl)-	Ketone	51733-68-7	40244.8	59310.9	25305.7	979680	1.0417e+06	1.02884e+06	1.05314	2.22882e-05	24.4289	4.61051	up
KMW0350	C9H10O2	Acetic acid, phenylmethyl ester	Ester	140-11-4	10136.8	12922.2	14534.2	3.30549e+06	3.61883e+06	3.56744e+06	1.06418	0.000772842	279.086	8.12457	up
NMW0064	C10H14O	Benzofuran, 4,5,6,7-tetrahydro-3,6-dimethyl-	Terpenoids	494-90-6	12448.7	17395	30660.8	1.12842e+06	1.13926e+06	1.13454e+06	1.05619	1.6919e-07	56.2307	5.81329	up
KMW0408	C10H14O	Benzenemethanol, .alpha.,.alpha.,4-trimethyl-	Terpenoids	1197-01-9	1528.39	1109.23	1443.06	28962	28843.9	29209	1.0629	1.26957e-08	21.3236	4.41438	up
D439	C10H20O	Cyclohexanol, 1-methyl-4-(1-methylethyl)-, trans-	Terpenoids	3901-93-7	263805	420211	199668	1.26205e+06	1.36878e+06	1.29027e+06	1.02456	0.000961166	4.43723	2.14966	up
D365	C8H10N2O	2-Acetyl-3-ethylpyrazine	Heterocyclic compound	32974-92-8	6010.63	5082.75	6085.56	434697	438890	435475	1.06468	2.66196e-06	76.2015	6.25175	up
WMW0197	C10H16O2	Lilac Aldehyde D	Aldehyde	53447-47-5	180240	250318	164505	1.05873e+06	1.12074e+06	1.03872e+06	1.05288	1.79364e-05	5.40813	2.43513	up
WMW0065	C9H18O	(6Z)-Nonen-1-ol	Alcohol	35854-86-5	139536	191718	109100	4.04737e+06	4.40966e+06	4.32314e+06	1.0601	0.000418373	29.0225	4.8591	up
KMW0361	C9H10O	BenzAldehyde, 4-ethyl-	Aldehyde	4748-78-1	7014	4830	5108	42264	35350	37722	1.05626	0.00170316	6.80368	2.76632	up
XMW0304	C10H18O2	Butanoic acid, 5-hexenyl ester	Ester	108058-75-9	243519	175070	153291	8391077	8419805	8229536	1.06238	2.40524e-06	43.7861	5.4524	up
D307	C10H18O	Bicyclo[3.1.1]heptan-3-ol, 2,6,6-trimethyl-, (1.alpha.,2.beta.,3.alpha.,5.alpha.)-	Terpenoids	27779-29-9	15525.2	7788.72	7120.22	456208	457610	445325	1.05668	3.54321e-07	44.6586	5.48086	up
WMW0011	C10H16O	Cyclohexanone, 5-methyl-2-(1-methylethenyl)-	Terpenoids	529-00-0	31196.5	22238.7	26211.5	1.05459e+06	1.03837e+06	1.00787e+06	1.06356	0.000114338	38.9323	5.2829	up
WMW0041	C10H16O	Isopinocarveol	Terpenoids	6712-79-4	23951.4	17747.2	14664.6	701254	704222	686787	1.0619	1.77727e-06	37.1211	5.21417	up
KMW0368	C7H8O2S	Ethanethioic acid, S-(2-furanylmethyl) ester	Heterocyclic compound	13678-68-7	70628.7	60614.9	71055.7	2.74358e+06	2.9228e+06	2.86619e+06	1.06457	0.000344668	42.178	5.39842	up
XMW0660	C8H14O2	2-Octenoic Acid	Acid	1470-50-4	9	9	9	39104	36246	37729.2	1.06509	0.0004792	4188.12	12.0321	up
D348	C10H18O	Cyclobutaneethanol, 1-methyl-2-(1-methylethenyl)-, cis-	Alcohol	30820-22-5	37509	28642	24425.4	1.27501e+06	1.27367e+06	1.2489e+06	1.0628	2.17643e-06	41.9268	5.3898	up
XMW0487	C6H6N2O2	2-Picoline, 6-nitro-	Heterocyclic compound	18368-61-1	41917.1	32656.8	27841.2	1.29552e+06	1.30434e+06	1.26784e+06	1.06288	9.91604e-06	37.7649	5.23897	up
XMW0241	C13H28	Undecane, 4,8-dimethyl-	Hydrocarbons	17301-33-6	9	9	9	5399.11	6303.07	4877.56	1.06464	0.00564759	614.064	9.26225	up
KMW0374	C10H18O	4-Hexen-1-ol, 5-methyl-2-(1-methylethenyl)-, (R)-	Terpenoids	498-16-8	236704	349484	177215	1.14785e+07	1.24638e+07	1.22212e+07	1.05964	0.000457867	47.3714	5.56594	up
KMW0380	C9H14N2O	Pyrazine, 2-methoxy-3-(2-methylpropyl)-	Heterocyclic compound	24683-00-9	2823.35	2649	1709.78	26662.3	25811	23776.8	1.05558	0.000332713	10.6166	3.40825	up
KMW0376	C9H20O	2-Nonanol	Alcohol	628-99-9	725685	684885	764553	192717	200699	202950	1.06353	0.00162121	0.274175	-1.86683	down
XMW0612	C13H28	Undecane, 4,7-dimethyl-	Hydrocarbons	17301-32-5	6272.44	5675.28	3784	170676	170908	166202	1.06105	3.47993e-06	32.2779	5.01247	up
KMW0431	C8H10N2	5H-5-Methyl-6,7-dihydrocyclopentapyrazine	Heterocyclic compound	23747-48-0	49980.6	41934.8	106590	3.08642e+06	3.18809e+06	3.15669e+06	1.05383	6.02682e-07	47.5111	5.57019	up
KMW0496	C8H16O3	Hexanoic acid, 3-hydroxy-, ethyl ester	Ester	2305-25-1	51951.1	51242.4	72735.5	244573	253958	251169	1.05186	0.000344367	4.26138	2.09132	up
KMW0531	C9H16O	3,6-Nonadien-1-ol, (E,Z)-	Alcohol	56805-23-3	9	9	9	589531	671361	658192	1.06503	0.00156902	71077.2	16.1171	up
KMW0543	C10H18O2	(3R,6R)-2,2,6-Trimethyl-6-vinyltetrahydro-2H-pyran-3-ol	Heterocyclic compound	14009-71-3	180573	299319	139533	3.41082e+06	3.70368e+06	3.6301e+06	1.05251	4.53782e-05	17.3461	4.11654	up
KMW0284	C8H10O	Phenylethyl Alcohol	Alcohol	60-12-8	9	9	9	868575	933193	936264	1.06506	0.000584195	101409	16.6298	up
KMW0386	C10H16O	cis-Dihydrocarvone	Terpenoids	3792-53-8	855598	767465	659191	114587	145604	118131	1.058	0.00662274	0.165767	-2.59277	down
NMW0093	C10H14O	D-Verbenone	Terpenoids	18309-32-5	17785.4	13247.9	17586.5	54759.3	56031.9	60580.8	1.05194	7.3446e-05	3.52474	1.81752	up
XMW0943	C13H28	Undecane, 3,5-dimethyl-	Hydrocarbons	17312-81-1	19925.1	14638.9	8976.24	9	9	9	1.06284	0.0443661	0.000620116	-10.6552	down
D81	C9H12O3	2-Furanpropanoic acid, ethyl ester	Heterocyclic compound	10031-90-0	2764595	2171300	1.88155e+06	828285	853201	837039	1.0379	0.0312671	0.369423	-1.43665	down
XMW0239	C13H28	Decane, 3-ethyl-3-methyl-	Hydrocarbons	17312-66-2	16888.7	14161.6	18214.3	898287	1.03224e+06	995972	1.06406	0.00172092	59.4036	5.89248	up
XMW1401	C11H20O2	n-Valeric acid cis-3-hexenyl ester	Ester	35852-46-1	10129.3	11211.4	17257	475466	534265	516931	1.06057	0.00105501	39.5532	5.30572	up
NMW0101	C10H16O2	Ascaridole	Terpenoids	512-85-6	32026.1	28188.6	32940.8	113939	88469	96938.3	1.05351	0.00958615	3.21341	1.6841	up
XMW0586	C13H28	Dodecane, 5-methyl-	Hydrocarbons	17453-93-9	917963	666187	756715	2480.34	2018.63	2461.86	1.06407	0.00883891	0.00297362	-8.39357	down
KMW0435	C10H18O	2-Decenal, (Z)-	Aldehyde	2497-25-8	59147278	4.18779e+07	4.74462e+07	9	9	9	1.06497	0.0104085	1.81853e-07	-22.3907	down
NMW0074	C10H16O	Bicyclo[3.1.1]hept-2-ene-2-methanol, 6,6-dimethyl-	Terpenoids	515-00-4	1.07026e+06	938009	817275	4.69895e+06	4.58277e+06	4.55416e+06	1.06013	1.20848e-05	4.89671	2.29181	up
D188	C5H5N3O	Pyrazinamide	Heterocyclic compound	98-96-4	2.46262e+08	1.75651e+08	2.00333e+08	99843.6	21493.1	10230.2	1.05296	0.00980741	0.000211439	-12.2075	down
XMW1295	C10H24N2	1,6-HexanediAmine, N,N,N',N'-tetramethyl-	Amine	111-18-2	2732	4088	1554.45	9	9	9	1.05978	0.0627593	0.00322409	-8.27689	down
KMW0424	C11H22O2	Butanoic acid, 2-methyl-, hexyl ester	Ester	10032-15-2	638.724	984.506	1793.21	630454	735079	713830	1.06028	0.00212002	608.634	9.24943	up
XMW0740	C7H7N3	3-Methyl-pyrrolo(2,3-b)pyrazine	Heterocyclic compound	20321-99-7	1524.7	1345.84	2027	8761.5	9568.5	8791	1.05378	3.99435e-05	5.53767	2.46928	up
XMW0441	C2H2ClN3	1H-1,2,4-Triazole, 3-chloro-	Heterocyclic compound	6818-99-1	9	9	9	60000	63952.8	60361.9	1.06504	0.000421544	6826.47	12.7369	up
XMW0727	C9H10O	BenzAldehyde, 2,5-dimethyl-	Aldehyde	5779-94-2	9	9	9	228132	235298	221555	1.06505	0.000301946	25369.8	14.6308	up
NMW0095	C8H6N2	Quinoxaline	Heterocyclic compound	91-19-0	9	9	9	2764.04	3347.09	2864.58	1.06474	0.00361962	332.434	8.37692	up
XMW1465	C10H16O2	7-Oxabicyclo[4.1.0]heptan-2-one, 6-methyl-3-(1-methylethyl)-	Ketone	5286-38-4	105916456	77349607	86219980	49712	8229.52	2309.88	1.04528	0.00871965	0.000223579	-12.1269	down
D110	C10H16O2	Bicyclo[3.1.1]heptan-3-one, 2-hydroxy-2,6,6-trimethyl-	Ketone	10136-65-9	88143109	63353545	71746643	33357	5033.28	3193.88	1.05176	0.00943736	0.000186273	-12.3903	down
KMW0449	C11H18O2	Bicyclo[2.2.1]heptan-2-ol, 1,7,7-trimethyl-, formate, endo-	Ester	7492-41-3	7861.1	6277.04	11105.5	63401.5	69477.1	72457	1.05143	0.000249345	8.13414	3.02399	up
WMW0083	C10H20O	2-Decen-1-ol, (E)-	Alcohol	18409-18-2	2553004	1872818	2092293	9	9	9	1.06495	0.00840259	4.1423e-06	-17.8811	down
D134	C7H12O5	Glycerol 1,2-diacetate	Ester	102-62-5	9	9	9	20483	24950	23043	1.0649	0.00320149	2536.15	11.3084	up
XMW0933	C12H18O2	Bicyclo[3.1.1]hept-2-en-6-ol, 2,7,7-trimethyl-, acetate, [1S-(1.alpha.,5.alpha.,6.beta.)]-	Ester	50764-55-1	32227.1	23318.2	32771.1	185723	155047	158043	1.05442	0.00265263	5.64803	2.49775	up
XMW0089	C10H18O	4-Decenal, (E)-	Aldehyde	65405-70-1	18367.2	18321.3	13239.1	1.84428e+06	2.05909e+06	2.00871e+06	1.0639	0.00109229	118.413	6.88768	up
NMW0071	C10H18O	L-.alpha.-Terpineol	Terpenoids	10482-56-1	4510655	3968039	3448155	1052404	1087830	1048316	1.05747	0.0108095	0.267342	-1.90324	down
XMW0269	C10H18O3	2-Methylbutanoic anhydride	Others	1468-39-9	19875.9	34670.5	33008.3	1.16766e+06	1.20457e+06	1.36448e+06	1.06003	0.00233632	42.6785	5.41544	up
NMW0075	C10H18O	Cyclohexanol, 1-methyl-4-(1-methylethylidene)-	Terpenoids	586-81-2	5.15155e+06	4.59293e+06	3.90594e+06	1.23681e+06	1.26466e+06	1.23762e+06	1.05669	0.0116396	0.273918	-1.86818	down
XMW0246	C10H16O2	OxiranecarboxAldehyde, 3-methyl-3-(4-methyl-3-pentenyl)-	Aldehyde	16996-12-6	7918.9	6833	7196.55	179480	194319	192583	1.06456	0.000632354	25.8051	4.68959	up
D245	C10H14O	4-Phenyl-2-butanol	Alcohol	2344-70-9	9035.94	11194.9	11364.3	42332.5	37149.1	37633.4	1.05626	0.000833678	3.70674	1.89015	up
XMW0534	C10H14O	Bicyclo[3.1.1]hept-3-en-2-one, 4,6,6-trimethyl-, (1S)-	Terpenoids	1196-01-6	18308.1	24717.2	16570.4	534431	523287	517170	1.06226	4.22952e-06	26.4262	4.7239	up
XMW0711	C7H7NO	Formamide, N-phenyl-	Amine	103-70-8	36036.3	23255.1	29165.6	223407	239730	246857	1.05709	0.000106961	8.02643	3.00476	up
KMW0385	C10H18O	2-methyl-5-(1-methylethenyl)-Cyclohexanol	Terpenoids	619-01-2	5.15026e+06	4.58833e+06	3.90361e+06	1.23642e+06	1.2647e+06	1.23766e+06	1.05667	0.011673	0.27406	-1.86744	down
WMW0024	C10H14O	Verbenone	Terpenoids	80-57-9	18030.9	22302	15090.5	534431	523287	517170	1.06271	9.37458e-06	28.4155	4.82861	up
XMW0296	C10H20O2	Acetic acid, octyl ester	Ester	112-14-1	1606.09	900.889	1104.06	16924.7	16460.5	12523.9	1.05282	0.00851173	12.7135	3.66829	up
KMW0377	C11H20O2	cis-3-Hexenyl-.alpha.-methylbutyrate	Ester	53398-85-9	7539.55	6523.37	8927.29	376954	434945	420457	1.06362	0.00183672	53.6035	5.74426	up
XMW0911	C10H18O2	1-Octen-1-ol, acetate	Alcohol	77149-68-9	727.507	789.247	650.184	44685.4	48727.9	49993.9	1.06458	0.00114685	66.1797	6.04832	up
KMW0381	C10H20O2	Hexanoic acid, butyl ester	Ester	626-82-4	3657.58	7545.13	7739.16	553851	658614	646946	1.05865	0.00286921	98.1641	6.61712	up
D332	C9H15N	2-Nonenenitrile	Nitrogen compounds	29127-83-1	343012	307059	258210	1.0884e+06	1.05872e+06	1.05268e+06	1.0562	0.000167366	3.52293	1.81677	up
XMW1092	C10H12O2	spiro[3-oxatricyclo[3.3.1.02,4]nonane-8,1'-cyclopropane]-6-one	Ketone	109637-57-2	1.07306e+06	940920	820308	4.73411e+06	4.60964e+06	4.57426e+06	1.06017	7.76477e-06	4.91059	2.2959	up
XMW0408	C8H14O2	1-Methylcyclohexylcarboxylic Acid	Acid	1123-25-7	10739.8	15732.8	7229.96	9	9	9	1.06288	0.04506	0.000801125	-10.2857	down
NMW0080	C8H18O2	1,2-Octanediol	Alcohol	1117-86-8	9953.74	14907.4	7220.9	9	9	9	1.06314	0.0415801	0.000841591	-10.2146	down
XMW0926	C10H12O	Ethanone, 1-(2,4-dimethylphenyl)-	Ketone	89-74-7	8471	6659	9282.72	316082	303661	290246	1.06334	0.000566165	37.2752	5.22015	up
KMW0452	C10H12O	4-(1-methylethyl)-Benzaldehyde	Terpenoids	122-03-2	8953.15	6924.38	8930.28	313328	307169	291678	1.06378	0.000417238	36.7697	5.20044	up
XMW0526	C10H16O	AcetAldehyde, (3,3-dimethylcyclohexylidene)-, (Z)-	Aldehyde	26532-24-1	17644.3	8650.79	15345.4	130465	146655	141205	1.0467	0.000125223	10.0461	3.32857	up
KMW0372	C10H20O2	Butanoic acid, hexyl ester	Ester	2639-63-6	15947.7	14338.8	11890.5	9	9	9	1.06475	0.00697451	0.000640158	-10.6093	down
XMW0243	C13H28	Undecane, 2,5-dimethyl-	Hydrocarbons	17301-22-3	15686	12418.8	6502.37	9	9	9	1.06203	0.0502984	0.000780185	-10.3239	down
XMW0588	C7H13N3O	1,3,5-Triazaadamantan-7-ol	Heterocyclic compound	130267-10-6	5386.23	3138.35	2774.92	143280	141074	137639	1.05868	6.64284e-06	37.3461	5.22289	up
XMW1142	C10H14O	5-propan-2-ylbicyclo[3.1.0]hex-2-ene-2-carbAldehyde	Aldehyde	57129-54-1	35242	65545.8	22167.8	895679	908229	870954	1.04495	1.22635e-06	21.7547	4.44326	up
XMW0492	C6H9NO2	2,5-Pyrrolidinedione, 1-ethyl-	Heterocyclic compound	2314-78-5	4368.61	7516.93	7692.2	545724	648584	636761	1.06113	0.00285804	93.5281	6.54733	up
NMW0072	C10H18O	(1.alpha.,2.beta.,5.alpha.)-2-methyl-5-(1-methylethenyl)-Cyclohexanol	Terpenoids	38049-26-2	5.15261e+06	4.5895e+06	3.90597e+06	1.28421e+06	1.31837e+06	1.28166e+06	1.05616	0.011975	0.2846	-1.81299	down
XMW0835	C12H18	Benzene, 1-methyl-2-(1-ethylpropyl)-	Aromatics	54410-74-1	15196.5	16849.8	17281.8	210311	208756	201108	1.06441	0.000116907	12.5724	3.65219	up
XMW0773	C4H9NO5	Ethanol, 2-(2-hydroxyethoxy)-, 1-nitrate	Alcohol	20633-16-3	69812	53871.8	47953.2	8989.8	11141.4	8589.73	1.05308	0.0171086	0.167335	-2.57919	down
XMW0122	C10H18O	Cyclohexanol, 2-methyl-3-(1-methylethenyl)-, (1.alpha.,2.alpha.,3.alpha.)-	Alcohol	54244-81-4	210381	152772	110380	37671.9	43647.6	44949.1	1.01954	0.0565316	0.266652	-1.90697	down
XMW1457	C8H8O2	BenzAldehyde, 3-methoxy-	Aldehyde	591-31-1	4722961	4244955	3638604	1045076	1089679	1064419	1.05833	0.0097693	0.253771	-1.9784	down
KMW0388	C10H16O	Carveol	Terpenoids	99-48-9	13087.8	12378.2	13575.1	59088.1	60847.1	59842.1	1.06427	8.3909e-07	4.60482	2.20314	up
XMW1074	C10H18O	1-Cyclopentene-1-methanol, 2-methyl-5-(1-methylethyl)-	Alcohol	80113-82-2	103771	71780	112720	437480	413617	386738	1.04536	9.53325e-05	4.29399	2.10232	up
KMW0406	C12H26	Dodecane	Hydrocarbons	112-40-3	43305.2	21639.8	20927.2	1.30307e+06	1.48951e+06	1.46188e+06	1.05741	0.00150899	49.544	5.63064	up
XMW0725	C10H16O	(-)-cis-Isopiperitenol	Terpenoids	96555-02-1	10599.5	7361.6	4739.18	158900	164092	151705	1.05327	6.09957e-05	20.9115	4.38622	up
NMW0082	C10H16O	(-)-trans-Isopiperitenol	Terpenoids	74410-00-7	9009.25	7871.96	5427.29	181548	182275	172755	1.06038	7.73556e-05	24.0526	4.58812	up
D287	C10H16O	Cyclopentanone, 2-(3-methyl-2-buten-1-yl)-	Ketone	2520-60-7	11710.1	7081.11	4741.85	152893	185561	147211	1.04903	0.0049218	20.6376	4.3672	up
XMW0213	C11H22O2	Isopentyl hexanoate	Ester	2198-61-0	1.08303e+07	7.75817e+06	8.76431e+06	9	9	9	1.06496	0.00969329	9.87104e-07	-19.9503	down
XMW0491	C3H7N5	3-Methyl-4,5-diamino-1,2,4(4H)-triazole	Heterocyclic compound	21532-07-0	2328.93	1026.62	1455.34	9	9	9	1.06045	0.0531791	0.00561226	-7.4772	down
D113	C10H14O2	Benzene, (2,2-dimethoxyethyl)-	Aromatics	101-48-4	9	9	9	12651	14503	14588	1.06497	0.00205929	1546	10.5943	up
WMW0216	C12H20O2	Fenchyl acetate	Ester	13851-11-1	9	9	9	135870	172425	162892	1.06492	0.00482391	17451.4	14.0911	up
XMW1064	C8H12N2	1,4-Methano-1H-Cyclopropa[d]pyridazine, 4,4a,5,5a-tetrahydro-6,6-dimethyl-, (1.alpha.,4.alpha.,4a.alpha.,5a.alpha.)-	Heterocyclic compound	109746-10-3	140417	93348.5	106039	443321	492692	504895	1.0494	0.000162833	4.24041	2.0842	up
NMW0092	C10H18O	(+)-neodihydrocarveol	Terpenoids	18675-33-7	33142	24484.8	26193.8	87581.1	98089.3	90986	1.05118	0.000110484	3.30058	1.72272	up
XMW1087	C7H10O4	2(3H)-Furanone, 5-(acetyloxy)dihydro-5-methyl-	Heterocyclic compound	57681-51-3	9	9	9	42470	49171.1	48224.1	1.06499	0.00201158	5180.19	12.3388	up
XMW0545	C10H15N	Benzenemethanamine, N-(1-methylethyl)-	Amine	102-97-6	70743	56930.7	63651	196450	205821	210147	1.05845	1.59206e-05	3.20094	1.67849	up
XMW0238	C13H28	Undecane, 4,4-dimethyl-	Hydrocarbons	17312-68-4	13374.2	12728.2	13298.5	429087	491580	470837	1.06469	0.00165646	35.3165	5.14227	up
XMW0189	C10H16O	3-Cyclohexene-1-acetAldehyde, .alpha.,4-dimethyl-	Aldehyde	29548-14-9	330565	431294	197631	78597.5	87722.1	89294	1.00022	0.0737046	0.266406	-1.9083	down
D376	C10H14O	(Z)-2,6-Dimethylocta-2,5,7-trien-4-one	Ketone	33746-71-3	14393.2	15439.1	15519.5	36123.4	35366.9	36228.1	1.06327	3.05787e-06	2.37518	1.24803	up
D290	C10H12O	2-Butanone, 4-phenyl-	Ketone	2550-26-7	6069.11	4999.7	6244.59	250243	240521	231094	1.06422	0.0005233	41.6936	5.38175	up
KMW0421	C8H8O3	Methyl salicylate	Ester	119-36-8	62488.9	57023.5	45952.9	14477.4	14600	13460.9	1.05472	0.0134255	0.257083	-1.95969	down
XMW1083	C10H20O2	7-Octene-2,6-diol, 2,6-dimethyl-	Alcohol	29210-77-3	7398.46	6225.87	8185.58	451365	530360	517856	1.06393	0.00245646	68.7569	6.10343	up
D359	C10H16N2	Pyrazine, 2,3-dimethyl-5-(1-methylpropyl)-	Heterocyclic compound	32263-00-6	64664	45944	50670	4405	5098	4613	1.0608	0.0127866	0.0875259	-3.51415	down
KMW0428	C10H16O	2-Cyclohexen-1-one, 3-methyl-6-(1-methylethyl)-	Terpenoids	89-81-6	2.01471e+07	1.42306e+07	1.6266e+07	9	9	9	1.06496	0.0104038	5.33137e-07	-20.839	down
KMW0429	C11H18O2	Isobornyl formate	Ester	1200-67-5	55114	35258	40914	15472.3	16125.1	14807.5	1.03053	0.0404182	0.353464	-1.50037	down
KMW0441	C10H12O2	Benzeneacetic acid, ethyl ester	Ester	101-97-3	9	9	9	1.10225e+06	1.08878e+06	1052222	1.06507	0.000191071	120121	16.8741	up
KMW0442	C9H12O	3-Phenylpropanol	Alcohol	122-97-4	74073.5	58341.9	59983	177668	188792	200096	1.05314	0.000161704	2.9447	1.55812	up
XMW0855	C6H10OS2	Ethanone, 1-(2-methyl-1,3-dithiolan-2-yl)-	Heterocyclic compound	33266-07-8	31150.2	27089.7	32932	175570	155047	158043	1.0615	0.0012789	5.35978	2.42217	up
KMW0413	C10H14O	(-)-Carvone	Terpenoids	6485-40-1	2.01471e+07	1.42219e+07	1.6266e+07	9	9	9	1.06496	0.0104332	5.33228e-07	-20.8387	down
XMW0776	C10H10O2	Benzoic acid, 2-propenyl ester	Ester	583-04-0	6.09089e+07	4.21714e+07	4.89473e+07	24607.5	8450.89	6611.34	1.0598	0.0114888	0.000260938	-11.904	down
XMW0497	C6H4O2S	2,5-ThiophenedicarboxAldehyde	Heterocyclic compound	932-95-6	9	9	9	7011.24	6960.03	7131.49	1.06509	5.23164e-05	781.584	9.61026	up
NMW0176	C8H9NO	Benzeneacetamide	Amine	103-81-1	765363	606481	561571	273931	326458	288651	1.02686	0.0243814	0.459829	-1.12083	down
XMW0472	C9H10O3	1,2-Ethanediol, monobenzoate	Ester	94-33-7	239499	150762	165550	69350.9	65784.1	64184.1	1.02406	0.0490302	0.358609	-1.47952	down
XMW0544	C15H24	Azulene, 1,2,3,3a,4,5,6,7-octahydro-1,4-dimethyl-7-(1-methylethenyl)-, [1R-(1.alpha.,3a.beta.,4.alpha.,7.beta.)]-	Terpenoids	22567-17-5	3.90458e+06	2.35842e+06	2.79035e+06	35968.7	37867.8	40386.1	1.06239	0.0230698	0.0126166	-6.30853	down
KMW0563	C13H22O	5,9-Undecadien-2-one, 6,10-dimethyl-, (E)-	Ketone	3796-70-1	635421	549750	517542	1.27496e+06	1.89232e+06	1.62722e+06	1.03171	0.0251799	2.8158	1.49354	up
XMW1455	C7H9NO2	5-Amino-2-methoxyphenol	Phenol	1687-53-2	244951	240627	157837	2147.44	3586.34	3446.26	1.05956	0.0174842	0.0142677	-6.13111	down
NMW0177	C8H9NO	N-Benzylformamide	Amine	6343-54-0	2.07023e+06	2.0542e+06	1.35241e+06	60701.6	92926.4	76135.4	1.05794	0.0176943	0.0419519	-4.57512	down
D99	C10H13NO2	Benzoic acid, 2-(dimethylamino)-, methyl ester	Ester	10072-05-6	15774.6	17054.6	17701.8	3242.65	3827.78	3571.22	1.06237	0.00083771	0.210597	-2.24745	down
D443	C11H16O3	2-Furancarboxylic acid, hexyl ester	Ester	39251-86-0	4.31416e+06	3.38995e+06	3.27512e+06	1.35563e+06	1.87353e+06	1.66783e+06	1.01568	0.0134242	0.446023	-1.16481	down
XMW0244	C13H22O	2-Butanone, 4-(2,6,6-trimethyl-1-cyclohexen-1-yl)-	Ketone	17283-81-7	7.2225e+06	5.59095e+06	5.43873e+06	2.31319e+06	3.15729e+06	2.8343e+06	1.0131	0.0164943	0.455002	-1.13605	down
D156	C13H18O2	Propanoic acid, 2-methyl-, 3-phenylpropyl ester	Ester	103-58-2	35182.4	32717.8	22637.1	9	9	9	1.06442	0.0157967	0.00029822	-11.7113	down
NMW0193	C8H10O2	Benzeneethanol, 4-hydroxy-	Alcohol	501-94-0	99335	80149.6	78740.8	383877	488987	444762	1.05653	0.00552361	5.10262	2.35124	up
XMW0819	C15H24	(1S,4S,4aR)-1-Isopropyl-4-methyl-7-methylene-1,2,3,4,4a,5,6,7-octahydronaphthalene	Terpenoids	157477-72-0	1.0834e+06	691745	661039	114112	164176	140628	1.04101	0.0372276	0.171956	-2.53989	down
NMW0202	C11H16O	Phenol, 4-pentyl-	Phenol	14938-35-3	982614	724813	736459	245768	354308	309835	1.02226	0.0164249	0.372321	-1.42538	down
KMW0597	C15H24	.gamma.-Muurolene	Terpenoids	30021-74-0	3911368	2373623	2803874	37636.6	39293.7	42347.8	1.06237	0.022673	0.0131235	-6.2517	down
D358	C12H22O2	4-tert-Butylcyclohexyl acetate	Ester	32210-23-4	56740.3	37360.2	42317	9	9	9	1.06459	0.0159569	0.000197922	-12.3028	down
XMW0303	C12H22O2	Hexanoic acid, 5-hexenyl ester	Ester	108058-81-7	1.97933e+06	1.34973e+06	1.44805e+06	25036.9	31042.6	30288.1	1.06264	0.0152772	0.0180795	-5.7895	down
XMW0229	C10H18O3	Nonanoic acid, 9-oxo-, methyl ester	Ester	1931-63-1	27964	21770	22385	5432.55	7703.89	8107.78	1.03532	0.00611149	0.294572	-1.76331	down
XMW0553	C10H10O3	2-Acetoxyacetophenone	Ketone	7250-94-4	438011	379419	291491	89409.1	119815	108654	1.03662	0.021353	0.286656	-1.80261	down
KMW0519	C8H8O3	Vanillin	Aldehyde	121-33-5	651324	665466	426032	196.133	168.429	220.899	1.06399	0.0173735	0.000335926	-11.5396	down
XMW1164	C7H7BrO2	2-bromo-4-methoxy-Phenol	Phenol	17332-11-5	3840.1	2901.44	3357.63	742.864	792.094	1119.6	1.0385	0.00498296	0.262849	-1.9277	down
KMW0558	C14H24O2	1,5-Dimethyl-1-vinyl-4-hexenyl butyrate	Ester	78-36-4	438439	455159	274325	19260.2	24316.7	19599.9	1.05716	0.0236017	0.0540933	-4.2084	down
XMW0979	C15H24	(4R,4aS,6S)-4,4a-Dimethyl-6-(prop-1-en-2-yl)-1,2,3,4,4a,5,6,7-octahydronaphthalene	Terpenoids	823810-22-6	811545	479411	575040	9	9	9	1.06464	0.0242735	1.44695e-05	-16.0766	down
NMW0160	C7H6O4	Benzoic Acid, 2,3-dihydroxy-	Acid	303-38-8	1.85682e+06	1.28282e+06	1.36332e+06	19354.5	25239.5	23930.1	1.06272	0.01441	0.0152175	-6.03812	down
KMW0525	C10H20O2	n-Decanoic Acid	Acid	334-48-5	28560	19220	19812	9	9	9	1.06447	0.0175045	0.000399456	-11.2897	down
NMW0162	C10H18O2	8-Methyl-6-nonenoic Acid	Acid	21382-25-2	7.5496e+06	5.14995e+06	5.50861e+06	28648.2	29041.5	17783.8	1.06249	0.0149435	0.00414504	-7.9144	down
KMW0552	C15H24	(-)-.beta.-Bourbonene	Terpenoids	5208-59-3	1.80227e+06	1.24142e+06	1.29107e+06	316292	359352	343505	1.04948	0.0248355	0.23511	-2.08859	down
XMW0159	C16H34	2,6,10-Trimethyltridecane	Hydrocarbons	3891-99-4	92232.2	80574.6	75640.5	211023	305070	264804	1.04073	0.0200156	3.14311	1.65219	up
w21	C10H14O2	2H-Pyran-2-one, 6-pentyl-	Heterocyclic compound	27593-23-3	69885.3	61986	60377.5	136893	201706	172972	1.03236	0.027229	2.66098	1.41196	up
XMW1435	C14H22O2	(6,6-dimethyl-2-bicyclo[3.1.1]hept-2-enyl)methyl 2-methylpropanoate	Ester	29021-37-2	1.16415e+06	850233	857715	289607	410130	361980	1.02292	0.0194354	0.369666	-1.43571	down
NMW0208	C9H16O3	9-Oxononanoic Acid	Acid	2553-17-5	14152	13676.7	13504.7	45371.1	64526.3	56426.1	1.05278	0.0171993	4.02395	2.00861	up
XMW0974	C15H24	1,2,4-Methenoazulene, decahydro-1,5,5,8a-tetramethyl-, [1S-(1.alpha.,2.alpha.,3a.beta.,4.alpha.,8a.beta.,9R*)]-	Terpenoids	1137-12-8	12325.3	9476.32	9829.88	70233.1	75923.4	70603.6	1.06083	0.00010262	6.85267	2.77667	up
D102	C11H14O	1-Pentanone, 1-phenyl-	Ketone	1009-14-9	32392.5	24705.9	21813.5	73354.3	88666.9	78781.8	1.03797	0.00100231	3.05154	1.60954	up
NMW0163	C8H10O2	p-Hydroxyphenyl methyl carbinol	Alcohol	2380-91-8	2723.78	5865.06	2035.85	232872	290318	268656	1.05387	0.00396424	74.5287	6.21972	up
NMW0165	C7H8O2	Orcinol	Phenol	504-15-4	32710	22509.5	25975	1270	1369	1172	1.06203	0.0131873	0.0469367	-4.41314	down
NMW0164	C10H10O2	Benzene, 1,2-(methylenedioxy)-4-propenyl-, (E)-	Aromatics	4043-71-4	4638.3	4199.43	4005.75	7124.95	10398.8	9577.39	1.00973	0.0362621	2.11011	1.07732	up
D175	C12H18O	.beta.-Phenylethylmethylethylcarbinol	Alcohol	10415-87-9	1.63426e+06	1.13171e+06	1.16166e+06	2.54032e+07	2.89756e+07	2.75374e+07	1.06156	0.0012685	20.8564	4.38242	up
NMW0180	C6H6N2O	Niacinamide	Amine	98-92-0	97298.9	91081.8	63451.7	11872.5	18543.5	16551.5	1.03945	0.0194414	0.186503	-2.42273	down
XMW1129	C10H12O3	Ethyl mandelate	Ester	774-40-3	9.84282e+06	7.68266e+06	7.44575e+06	3.07364e+06	4.24055e+06	3.79726e+06	1.01521	0.0143802	0.44497	-1.16822	down
w38	C15H24	1H-3a,7-Methanoazulene, octahydro-3,8,8-trimethyl-6-methylene-, [3R-(3.alpha.,3a.beta.,7.beta.,8a.alpha.)]-	Terpenoids	546-28-1	1.21909e+07	9.28684e+06	9.08163e+06	3.38148e+06	4.67988e+06	4.209e+06	1.02196	0.0163866	0.401526	-1.31644	down
D255	C10H10N2	Quinoxaline, 2,3-dimethyl-	Heterocyclic compound	2379-55-7	1.37483e+06	1.07476e+06	1.05038e+06	430233	590916	529589	1.01746	0.0133085	0.443072	-1.17439	down
KMW0578	C15H26O2	Butanoic acid, 3-methyl-, 1-ethenyl-1,5-dimethyl-4-hexenyl ester	Ester	1118-27-0	5.55635e+06	4.17182e+06	4.25076e+06	1.41606e+06	2.01226e+06	1.7726e+06	1.02633	0.0135703	0.372054	-1.42642	down
XMW0099	C13H28	Decane, 2,3,5-trimethyl-	Hydrocarbons	62238-11-3	46361.6	49026	30789	9	9	9	1.06438	0.0178052	0.000213986	-12.1902	down
XMW0372	C15H32	Tridecane, 4,8-dimethyl-	Hydrocarbons	55030-62-1	115026	78700.9	82451.7	1.80309e+06	2.07e+06	1.96404e+06	1.06149	0.00143243	21.1354	4.40159	up
XMW1331	C10H12O2	2-Propanone, 1-(4-methoxyphenyl)-	Ketone	122-84-9	5.72775e+06	3.91758e+06	4.15195e+06	112957	124938	114151	1.06272	0.0157019	0.0255156	-5.29247	down
NMW0169	C6H6O3	1,2,3-Benzenetriol	Phenol	87-66-1	96957.9	64664.2	70083.1	7368.23	8238.68	7562.03	1.05847	0.019955	0.0999932	-3.32203	down
KMW0526	C13H18O	2-Buten-1-one, 1-(2,6,6-trimethyl-1,3-cyclohexadien-1-yl)-, (E)-	Terpenoids	23726-93-4	1.82303e+07	1.2564e+07	1.34528e+07	185362	197001	183093	1.06355	0.0142889	0.0127795	-6.29003	down
XMW1097	C12H22O2	Hexanoic acid, 3-hexenyl ester	Ester	84434-19-5	290757	203608	214512	65467.2	76577.6	70987.8	1.04422	0.0251077	0.300521	-1.73446	down
XMW0618	C12H22O2	Ethyl 9-decenoate	Ester	67233-91-4	2999.58	1914.39	1739.41	7365.8	7804.09	8242.4	1.02976	0.00067248	3.51886	1.81511	up
WMW0223	C15H24	Cedrene	Terpenoids	11028-42-5	4.31189e+06	3.42705e+06	3.31445e+06	1.44361e+06	1.98512e+06	1.79448e+06	1.01096	0.0123243	0.472544	-1.08148	down
XMW1256	C13H20O	2-Butanone, 4-(2,6,6-trimethyl-1,3-cyclohexadien-1-yl)-	Ketone	20483-36-7	9.63704e+06	7.50904e+06	7.29344e+06	2.9926e+06	4.15141e+06	3.69398e+06	1.01487	0.0142227	0.443462	-1.17312	down
WMW0089	C13H22O	5,9-Undecadien-2-one, 6,10-dimethyl-	Ketone	689-67-8	636449	550151	517831	1.27496e+06	1.89232e+06	1.62722e+06	1.03158	0.0251665	2.81296	1.49209	up
KMW0572	C9H8O2	trans-Cinnamic Acid	Acid	140-10-3	85925.7	71168.8	67744.9	152451	216366	187112	1.02576	0.0197233	2.47256	1.30601	up
XMW0133	C13H20O2	6-Methyl-6-(5-methylfuran-2-yl)heptan-2-one	Ketone	50464-95-4	1.40797e+06	1.10099e+06	1.06214e+06	445436	616495	550634	1.01289	0.0146709	0.451559	-1.14701	down
KMW0686	C11H12O2	2-Propenoic acid, 3-phenyl-, ethyl ester, (E)-	Ester	4192-77-2	66833.4	47580.6	46323.2	15725.2	21396.6	19451	1.02398	0.0286057	0.351958	-1.50652	down
XMW0423	C13H22O	6,8-Nonadien-2-one, 8-methyl-5-(1-methylethyl)-, (E)-	Ketone	54868-48-3	5.63208e+06	3.87809e+06	4.17037e+06	115533	135935	124501	1.0626	0.0146302	0.027482	-5.18537	down
KMW0533	C9H9N	Indole, 3-methyl-	Heterocyclic compound	83-34-1	32307.6	23199.5	22577.4	5677.01	7793.85	6964.39	1.04013	0.0223574	0.261707	-1.93398	down
NMW0170	C9H8O2	Hydrocoumarin	Heterocyclic compound	119-84-6	72926.8	49023.1	46448.9	9907.77	11194.3	10921	1.04823	0.0324719	0.190162	-2.3947	down
D434	C12H22O2	5-Decen-1-ol, acetate, (E)-	Ester	38421-90-8	39248	39388	27156	3933	5179	4474	1.05444	0.0163524	0.128422	-2.96104	down
NMW0171	C8H8O3	Acetic Acid, phenoxy-	Acid	122-59-8	93050.2	68240	77386.8	156499	241436	208908	1.00847	0.0301818	2.54253	1.34627	up
XMW1098	C12H24O2	Butanoic acid, octyl ester	Ester	110-39-4	9	9	9	100411	114869	105734	1.065	0.00155318	11889.4	13.5374	up
D340	C12H16O	3-Hexanone, 1-phenyl-	Ketone	29898-25-7	1.48124e+07	1.16874e+07	1.12811e+07	4.7588e+06	6.49581e+06	5.85219e+06	1.01615	0.0134386	0.45279	-1.14309	down
NMW0185	C9H10N2	Pyridine, 3-(3,4-dihydro-2H-pyrrol-5-yl)-	Heterocyclic compound	532-12-7	505911	391932	382044	155437	225121	194515	1.00629	0.0136959	0.449316	-1.1542	down
XMW0825	C15H24	Bicyclo[3.1.1]heptane, 6-methyl-2-methylene-6-(4-methyl-3-pentenyl)-, [1R-(1.alpha.,5.alpha.,6.beta.)]-	Terpenoids	55123-21-2	211243	174512	173198	405398	595221	502873	1.02949	0.0242892	2.68984	1.42752	up
KMW0537	C15H24	Cyclohexane, 1-ethenyl-1-methyl-2,4-bis(1-methylethenyl)-, (1.alpha.,2.beta.,4.beta.)-	Terpenoids	33880-83-0	1.71189e+06	1.66473e+06	1.17014e+06	231882	320984	292202	1.04728	0.01735	0.185861	-2.4277	down
XMW0980	C15H24	(1R,3aR,4aR,8aR)-1,4,4,6-Tetramethyl-1,2,3,3a,4,4a,7,8-octahydrocyclopenta[1,4]cyclobuta[1,2]benzene	Terpenoids	94482-89-0	666274	557618	510384	1.16466e+06	1.74161e+06	1.52236e+06	1.01811	0.0264224	2.55359	1.35253	up
XMW1077	C7H14O4	1,3-Dioxolane-2,2-diethanol	Alcohol	5694-95-1	214224	171167	151872	14178.3	16219.7	16426.2	1.06055	0.0123737	0.0871531	-3.5203	down
KMW0555	C15H24	trans-.alpha.-Bergamotene	Terpenoids	13474-59-4	9.63649e+06	7.50818e+06	7.29245e+06	2.87191e+06	4.00208e+06	3.57204e+06	1.01808	0.0135028	0.427466	-1.22612	down
XMW0636	C10H21I	1-iodo-Decane	Halogenated hydrocarbons	2050-77-3	21044	15645	15693	5236.73	6863.59	6793.33	1.03084	0.0181471	0.36069	-1.47117	down
XMW0552	C13H16O2	2,2'-Isopropylidenebis(5-methylfuran)	Heterocyclic compound	59212-75-8	82035	61325.1	155736	403493	585540	513076	1.00371	0.00634199	5.02216	2.32831	up
XMW0461	C12H20O2	cis-3-Hexenyl cis-3-hexenoate	Ester	61444-38-0	286253	198461	214239	64498.3	74741.5	70081.9	1.04448	0.0251735	0.299479	-1.73947	down
XMW0182	C15H24	(3S,3aS,6R,8aS)-3,8,8-Trimethyl-7-methyleneoctahydro-1H-3a,6-methanoazulene	Terpenoids	31145-21-8	557379	371279	352396	3804.86	8894.69	6313.22	1.0559	0.0232845	0.0148415	-6.07422	down
XMW0629	C15H24	3H-3a,7-Methanoazulene, 2,4,5,6,7,8-hexahydro-1,4,9,9-tetramethyl-, [3aR-(3a.alpha.,4.beta.,7.alpha.)]-	Terpenoids	2387-78-2	434289	278954	309494	15427.4	18284.7	18361	1.05993	0.0208546	0.0509155	-4.29575	down
XMW0964	C15H24	Petasitene	Terpenoids	443124-67-2	2195.09	618.983	2071.6	937325	931924	875164	1.05647	0.000470084	561.727	9.13372	up
XMW0950	C13H18	Naphthalene, 1,2,3,4-tetrahydro-1,4,6-trimethyl-	Aromatics	22824-32-4	28272.8	17586	22945.9	2278.44	2852.59	3370.77	1.04965	0.0218162	0.123564	-3.01667	down
NMW0186	C12H20O2	Cyclohexanepropanoic Acid, 2-propenyl ester	Ester	2705-87-5	4.31485e+06	3.38995e+06	3.27564e+06	1.36441e+06	1.88098e+06	1.67396e+06	1.01556	0.0136037	0.448011	-1.15839	down
KMW0210	C15H24	1H-Cyclopenta[1,3]cyclopropa[1,2]benzene, octahydro-7-methyl-3-methylene-4-(1-methylethyl)-, [3aS-(3a.alpha.,3b.beta.,4.beta.,7.alpha.,7aS*)]-	Terpenoids	13744-15-5	2.27774e+06	1.5784e+06	1.50535e+06	175160	227112	207819	1.05484	0.0229697	0.113791	-3.13554	down
XMW0583	C8H8O2	Ethanone, 1-(3-hydroxyphenyl)-	Ketone	121-71-1	7.17013e+06	5.59413e+06	5.43873e+06	2.21966e+06	3.05769e+06	2.74049e+06	1.01681	0.0140154	0.440468	-1.18289	down
KMW0478	C15H24	cis-.beta.-Farnesene	Terpenoids	28973-97-9	162338	145402	129397	347580	518577	447008	1.03378	0.0242442	3.00402	1.58689	up
XMW0462	C11H16O	2-Cyclopenten-1-one, 3-methyl-2-(2-pentenyl)-, (Z)-	Ketone	488-10-8	12145.4	10453.2	11158.9	3096.25	3981.2	2905.12	1.05055	0.00038822	0.295714	-1.75772	down
D436	C10H12O3	Methyl p-tolyloxyacetate	Ester	38768-63-7	1944.94	741.853	1207.94	41545.9	43833	39764.5	1.05208	0.000346597	32.1315	5.00591	up
NMW0158	C7H7NO3	Benzene, 1-methoxy-2-nitro-	Aromatics	91-23-6	362312	218866	228289	9	9	9	1.06451	0.0282356	3.33553e-05	-14.8717	down
D445	C11H16O3	Furfuryl hexanoate	Ester	39252-02-3	998063	680325	739631	23040.6	29695	24995.2	1.06178	0.0152472	0.0321464	-4.9592	down
XMW0738	C8H9NO2	Benzoic acid, 4-amino-, methyl ester	Ester	619-45-4	75153.5	69179.6	64014.9	7221.48	6642.89	8370.48	1.06182	0.00218887	0.10672	-3.2281	down
WMW0217	C12H22O	2-Octenal, 2-butyl-	Alcohol	13019-16-4	4.68639e+06	3.26784e+06	3.4881e+06	554053	620197	583817	1.05697	0.0179838	0.153646	-2.70232	down
XMW1172	C9H8O3	3,6-Dimethyl-4H-furo[3,2-c]pyran-4-one	Heterocyclic compound	36745-38-7	5387.59	5460.04	5157.34	52416.4	59234.1	56861.5	1.06437	0.00151172	10.5287	3.39626	up
KMW0532	C12H24O2	Hexanoic acid, hexyl ester	Ester	6378-65-0	192529	134043	127537	527856	607390	575294	1.04388	0.000187155	3.76681	1.91334	up
XMW0195	C15H26	1H-Cycloprop[e]azulene, decahydro-1,1,4,7-tetramethyl-, [1aR-(1a.alpha.,4.beta.,4a.beta.,7.beta.,7a.beta.,7b.alpha.)]-	Terpenoids	28580-43-0	2.19914e+06	1.53919e+06	1.61924e+06	15829.3	16386.6	14892.6	1.06383	0.0135183	0.0087929	-6.82945	down
XMW1222	C7H6Cl2O3	2,4-Dioxabicyclo[3.2.0]hept-6-en-3-one, 1,5-dichloro-6,7-dimethyl-	Ketone	35436-20-5	100879	69810.5	74622.8	3753.84	4158.33	3792.98	1.06191	0.0150137	0.0477153	-4.38941	down
NMW0166	C12H10	Biphenyl	Aromatics	92-52-4	611824	417196	450037	9661.76	8958.05	8581.78	1.06302	0.0150989	0.0183912	-5.76484	down
XMW0384	C15H24	4,7-Methanoazulene, 1,2,3,4,5,6,7,8-octahydro-1,4,9,9-tetramethyl-, [1S-(1.alpha.,4.alpha.,7.alpha.)]-	Terpenoids	514-51-2	2.27935e+06	1.58011e+06	1.50662e+06	173286	224433	206892	1.05493	0.0228918	0.112673	-3.14979	down
KMW0530	C12H20O2	Geranyl acetate	Terpenoids	105-87-3	1.82276e+07	1.25639e+07	1.34473e+07	184899	198025	184165	1.06354	0.0142918	0.0128188	-6.28559	down
XMW0781	C8H7NO4	2-Nitrophenyl acetate	Ester	610-69-5	155487	107201	112199	10653.3	11392.6	10768.2	1.05995	0.0175827	0.0875305	-3.51407	down
NMW0168	C10H18O4	Diethyl adipate	Ester	141-28-6	177243	121551	128812	21174.3	25288.4	22704.1	1.05468	0.0203314	0.161753	-2.62813	down
XMW0262	C15H22	1,1,7,7a-Tetramethyl-1a,2,6,7,7a,7b-hexahydro-1H-cyclopropa[a]naphthalene	Terpenoids	154098-14-3	30029.4	19360.5	18999.1	9	9	9	1.06424	0.0242943	0.0003948	-11.3066	down
WMW0220	C15H24	2H-2,4a-Methanonaphthalene, 1,3,4,5,6,7-hexahydro-1,1,5,5-tetramethyl-, (2S)-	Terpenoids	1135-66-6	2.60122e+06	1.67452e+06	1.83842e+06	168335	229829	208682	1.05473	0.0229781	0.0992527	-3.33275	down
XMW0962	C12H16O2	Butanoic acid, 2-methyl-, phenylmethyl ester	Ester	56423-40-6	15392.9	35941.1	18451.2	697639	753249	689202	1.05339	0.000305531	30.6668	4.93861	up
D283	C13H20O	2-Buten-1-one, 1-(2,6,6-trimethyl-2-cyclohexen-1-yl)-, (E)-	Ketone	24720-09-0	97331.1	83580.8	75595.2	240881	341001	299309	1.04323	0.0154375	3.43535	1.78046	up
NMW0173	C7H6O4	2,6-dihydroxy-Benzoic Acid	Acid	303-07-1	223951	218203	152033	33512.1	39633.9	35362.8	1.0519	0.0191981	0.182617	-2.4531	down
WMW0010	C15H24	beta-Elemen	Terpenoids	515-13-9	1.78631e+06	1.2272e+06	1.2756e+06	352210	386068	364327	1.04788	0.026892	0.257071	-1.95976	down
XMW1408	C15H24	1H-Cyclopropa[a]naphthalene, 1a,2,3,3a,4,5,6,7b-octahydro-1,1,3a,7-tetramethyl-, [1aR-(1a.alpha.,3a.alpha.,7b.alpha.)]-	Terpenoids	489-29-2	67232.2	52097.3	55073.7	118368	169911	151003	1.02329	0.0203503	2.51877	1.33272	up
XMW0743	C15H24	(-)-Aristolene	Terpenoids	6831-16-9	246643	210782	202244	667517	913984	809093	1.04945	0.0126189	3.62393	1.85756	up
XMW0131	C15H24	Di-epi-.alpha.-cedrene	Terpenoids	50894-66-1	504392	321038	349924	110636	155679	139943	1.01307	0.0399626	0.345647	-1.53263	down
XMW1101	C14H22	Benzene, 1,4-dimethyl-2,5-bis(1-methylethyl)-	Aromatics	10375-96-9	19187.3	14457.2	16125.6	33530.9	46687.1	41336.9	1.0236	0.0156958	2.44233	1.28826	up
XMW0379	C15H24	Bicyclo[5.2.0]nonane, 2-methylene-4,8,8-trimethyl-4-vinyl-	Terpenoids	242794-76-9	57766.1	40608.3	42037.6	172955	174488	165339	1.04951	0.000275698	3.65199	1.86868	up
KMW0549	C12H22O	4a(2H)-Naphthalenol, octahydro-4,8a-dimethyl-,(4.alpha.,4a.alpha.,8a.beta.)-	Aromatics	19700-21-1	100607	80529.7	75079.5	36961.4	47690.1	42920	1.01146	0.0197675	0.497906	-1.00606	down
XMW0805	C10H10S	Benzo[b]thiophene, 2-ethyl-	Heterocyclic compound	1196-81-2	32761	27569.9	23470.3	895.327	1291.7	1225.21	1.06054	0.00979851	0.0407182	-4.61818	down
KMW0548	C15H24	[1aR-(1a.alpha.,4.alpha.,4a.beta.,7b.alpha.)]-1a,2,3,4,4a,5,6,7b-octahydro-1,1,4,7-tetramethyl-1H-Cycloprop[e]azulene	Terpenoids	489-40-7	269914	226149	176740	4991.09	6107.65	5854.3	1.06209	0.0148082	0.0251976	-5.31057	down
w39	C13H22O	2-Butanone, 4-(2,6,6-trimethyl-2-cyclohexen-1-yl)-	Ketone	31499-72-6	23480.9	17694.7	18437.6	138374	136658	127643	1.06025	6.31424e-05	6.7548	2.75591	up
NMW0183	C7H8O2	Benzenemethanol, 4-hydroxy-	Alcohol	623-05-2	4.31458e+06	3.38987e+06	3.27564e+06	1.39062e+06	1.91243e+06	1.7028e+06	1.01389	0.0139894	0.455902	-1.1332	down
WMW0110	C12H24O2	Undecanoic acid, methyl ester	Ester	1731-86-8	28040.2	21628.2	22990.4	6351.49	9757.32	9913.05	1.01518	0.00485454	0.358138	-1.48141	down
D344	C11H18O	(E,E)-2,4-Undecadienal	Aldehyde	30361-29-6	6.79385e+06	5.2673e+06	5.14402e+06	2.01672e+06	2.79018e+06	2.50508e+06	1.01926	0.0140314	0.424987	-1.23451	down
XMW0468	C15H24	Bicyclo[3.1.1]hept-2-ene, 2,6-dimethyl-6-(4-methyl-3-pentenyl)-	Terpenoids	17699-05-7	1.98898e+07	1.56858e+07	1.51576e+07	6.35733e+06	8.72756e+06	7.84573e+06	1.01554	0.0131685	0.451985	-1.14565	down
XMW1473	C10H16O2	2-Cyclohexen-1-one, 4-hydroxy-3-methyl-6-(1-methylethyl)-, trans-	Ketone	55955-53-8	23626.4	19316.9	18421.2	9	9	9	1.06484	0.00611896	0.000439993	-11.1502	down
D249	C11H14O3	Ethanol, 2-phenoxy-, propanoate	Ester	23495-12-7	19163	15112	13709	5187.29	6913.48	6369.85	1.02706	0.0190688	0.384933	-1.37732	down
NMW0188	C9H8O2	2-Propenoic Acid, 3-phenyl-	Acid	621-82-9	8.5453e+06	6.66171e+06	6.4335e+06	2.63733e+06	3.64845e+06	3.26879e+06	1.01509	0.0147636	0.441513	-1.17947	down
XMW0802	C8H8N2O	2-Hydroxymethylbenzimidazole	Heterocyclic compound	22128-99-0	7.61842e+06	5.95341e+06	5.7327e+06	2.35834e+06	3.25274e+06	2.92052e+06	1.01548	0.014747	0.441948	-1.17805	down
KMW0559	C15H24	Bicyclo[7.2.0]undec-4-ene, 4,11,11-trimethyl-8-methylene-,[1R-(1R*,4Z,9S*)]-	Terpenoids	118-65-0	9	9	9	498909	500288	470297	1.06505	0.000398035	54425.7	15.732	up
KMW0560	C9H6O2	Coumarin	Heterocyclic compound	91-64-5	28838.1	17626.2	17890.1	9	9	9	1.06409	0.0284208	0.000419552	-11.2189	down
XMW0797	C15H24	Naphthalene, 1,2,4a,5,6,8a-hexahydro-4,7-dimethyl-1-(1-methylethyl)-,[1R-(1.alpha.,4a.alpha.,8a.alpha.)]-	Terpenoids	17627-24-6	1.05465e+06	644150	673823	9	9	9	1.06463	0.0268092	1.13798e-05	-16.4232	down
D353	C15H24	(S,1Z,6Z)-8-Isopropyl-1-methyl-5-methylenecyclodeca-1,6-diene	Terpenoids	317819-80-0	626576	522677	499708	1.19752e+06	1.75823e+06	1.50547e+06	1.0287	0.0234909	2.70547	1.43588	up
XMW0160	C13H18O	Megastigmatrienone	Ketone	38818-55-2	4851.61	3571.42	3463.71	9	9	9	1.06436	0.0124773	0.00227144	-8.78218	down
KMW0566	C15H24	(4aR-trans)-decahydro-4a-methyl-1-methylene-7-(1-methylethylidene)-Naphthalene	Terpenoids	515-17-3	3.74334e+06	3.50317e+06	3.29434e+06	1.14893e+07	1.65948e+07	1.44782e+07	1.05058	0.018091	4.03784	2.01359	up
XMW0022	C10H16O2	Iridomyrmecin	Terpenoids	485-43-8	468849	357406	353545	117116	165048	149212	1.02792	0.0135489	0.365635	-1.45152	down
XMW0982	C15H22O	Benzene, [1-[[1-(1-methylethyl)-3-butenyl]oxy]ethyl]-, [S-(R*,R*)]-	Aromatics	98088-51-8	969831	687032	690695	190353	271342	241138	1.03195	0.0224735	0.299389	-1.73991	down
WMW0158	C8H8O3	Methylparaben	Ester	99-76-3	1.67545e+06	1.2896e+06	1.3095e+06	428655	600988	530313	1.03192	0.0102391	0.36494	-1.45427	down
D456	C12H24O	8-Dodecen-1-ol, (Z)-	Alcohol	40642-40-8	211367	159757	155676	51706.2	73114.9	62511.7	1.02854	0.0159838	0.355605	-1.49165	down
WMW0148	C15H24	Spiro[4.5]dec-7-ene, 1,8-dimethyl-4-(1-methylethenyl)-, [1S-(1.alpha.,4.beta.,5.alpha.)]-	Terpenoids	24048-44-0	497708	299478	361408	9	9	9	1.06464	0.022223	2.33041e-05	-15.3891	down
XMW0549	C15H24	(1S,4aR,7R)-1,4a-Dimethyl-7-(prop-1-en-2-yl)-1,2,3,4,4a,5,6,7-octahydronaphthalene	Terpenoids	52026-55-8	20022	15783.7	16331.8	54349.5	72259.2	66899.1	1.04933	0.00911095	3.71149	1.892	up
KMW0576	C15H24	Aromandendrene	Terpenoids	489-39-4	100714	60527.5	64918.4	9	9	9	1.06436	0.0273444	0.000119384	-13.0321	down
KMW0585	C14H26O2	Citronellyl isobutyrate	Ester	97-89-2	984042	770323	839661	1.71491e+06	2.52253e+06	2.18234e+06	1.02025	0.0255441	2.47483	1.30733	up
XMW1405	C12H10	1,8-Ethylenenaphthalene	Aromatics	83-32-9	1957.91	1264.6	1242.28	9	9	9	1.06317	0.0243031	0.00604733	-7.36949	down
XMW0742	C15H24	10,10-Dimethyl-2,6-dimethylenebicyclo[7.2.0]undecane	Terpenoids	357414-37-0	352130	215348	231889	5008.95	6247.04	6622.1	1.06046	0.0262898	0.0223653	-5.48259	down
KMW0639	C13H20O2	3-Buten-2-one, 4-(2,2,6-trimethyl-7-oxabicyclo[4.1.0]hept-1-yl)-	Terpenoids	23267-57-4	177901	129270	128298	42058	58679.3	53433.8	1.02524	0.0217743	0.354035	-1.49803	down
KMW0674	C12H24O	trans-2-Dodecen-1-ol	Alcohol	69064-37-5	84884.2	66242.6	84943.4	157871	256693	212860	1.00729	0.0395298	2.65779	1.41023	up
KMW0483	C11H22O	Undecanal	Aldehyde	112-44-7	14262.2	11722.6	6524.56	158028	155875	162120	1.04999	1.50903e-06	14.6427	3.87211	up
D294	C10H16O	2-Cyclopenten-1-one, 2-pentyl-	Ketone	25564-22-1	41618.8	24238.5	28149	183556	206318	200142	1.04882	6.735e-05	6.27634	2.64992	up
KMW0481	C11H22O2	Acetic acid, nonyl ester	Ester	143-13-5	9	9	9	43618	38640.9	40834.9	1.06507	0.00123014	4559.03	12.1545	up
NMW0143	C10H15N	BenzenAmine, 2,6-diethyl-	Amine	579-66-8	603588	823402	409162	16174	19883.5	17115.5	1.05748	0.0382145	0.028959	-5.10985	down
XMW1463	C12H20O3	2-Oxabicyclo[2.2.2]octan-6-ol, 1,3,3-trimethyl-, acetate	Ester	57709-95-2	41104.2	42109	35967.2	186846	192834	188343	1.06293	5.82366e-07	4.76608	2.2528	up
XMW1273	C10H14N2O	1-(5-Dimethylethyl)pyrazin-2-yl-ethan-1-one	Heterocyclic compound	182306-61-2	2453.71	1825.21	2108.7	6939.91	7287.54	5996.61	1.04796	0.0021305	3.16613	1.66272	up
XMW0731	C11H16	Benzene, pentamethyl-	Aromatics	700-12-9	417922	413489	370459	9	9	9	1.06504	0.00142448	2.2465e-05	-15.442	down
NMW0129	C12H20O2	Cyclohexanol, 1-methyl-4-(1-methylethenyl)-, acetate	Ester	10198-23-9	211457	133292	122087	538375	594840	574202	1.03086	0.000724968	3.65743	1.87083	up
KMW0482	C10H16O	2,4-Decadienal, (E,E)-	Aldehyde	25152-84-5	31156.4	20412.8	18974.2	82625.8	87684.6	81315.5	1.03553	0.000845319	3.56696	1.8347	up
D74	C9H10O2	4-Acetylanisole	Ketone	100-06-1	17943.7	12291.6	15861.8	111763	115458	113899	1.05858	4.92351e-06	7.40001	2.88753	up
XMW0422	C14H30	3,5-Dimethyldodecane	Hydrocarbons	107770-99-0	1523.05	1053.23	1091.17	3.48808e+06	3.93507e+06	3.80704e+06	1.06459	0.00125892	3062.12	11.5803	up
XMW0047	C10H14O	Phenol, 2-(1-methylpropyl)-	Phenol	89-72-5	235901	124346	156495	7.97471e+06	9.23072e+06	8.82348e+06	1.06009	0.00175708	50.3713	5.65453	up
XMW0961	C12H20O2	Bornyl acetate	Terpenoids	76-49-3	9	9	9	1.30239e+07	1.4733e+07	1.41937e+07	1.06504	0.00129871	1.55372e+06	20.5673	up
D266	C13H26	1-Tridecene	Hydrocarbons	2437-56-1	30763.5	19279.8	20454.4	460037	518458	506728	1.05999	0.000967931	21.0677	4.39696	up
XMW0615	C10H14O	Phenol, m-tert-butyl-	Phenol	585-34-2	52414	27570.6	31055.5	1.588e+06	1.71335e+06	1.69916e+06	1.05953	0.000385951	45.0334	5.49292	up
D415	C11H14O2	Isobutyric acid, 2-methylphenyl ester	Ester	36438-54-7	9	9	9	3.22297e+06	3.64769e+06	3.51416e+06	1.06504	0.00130957	384623	18.5531	up
XMW1131	C8H10O3	2,5-Furandione, 3-methyl-4-propyl-	Heterocyclic compound	16493-20-2	61966.1	88416	39213.9	1241	1449.34	1424.94	1.05649	0.0490166	0.0217055	-5.52579	down
KMW0557	C9H10O3	Benzoic acid, 2-hydroxy-, ethyl ester	Ester	118-61-6	9	9	9	23715.7	25312.6	25425.1	1.06505	0.000494749	2757.53	11.4292	up
NMW0124	C10H16O2	2-Cyclohexen-1-one, 2-hydroxy-3-methyl-6-(1-methylethyl)-	Terpenoids	490-03-9	9	9	9	1988	2206	1556	1.06406	0.00987607	212.963	7.73446	up
KMW0491	C9H10O2	Hydrocinnamic Acid	Acid	501-52-0	534924	467192	351313	1.84244e+06	1.98958e+06	1.94863e+06	1.04986	3.87946e-05	4.27112	2.09461	up
KMW0490	C9H16O2	trans-3-Methyl-4-octanolide	Ester	39638-67-0	11642.1	9622	8362.98	365112	396024	381212	1.06356	0.000508745	38.5575	5.26894	up
XMW1102	C11H10O2	Vinyl trans-cinnamate	Ester	17719-70-9	204405	302919	406071	14635.4	14803.7	11903.1	1.05552	0.0378222	0.0452622	-4.46555	down
XMW0956	C12H18O2	2-Cyclohexen-1-ol, 2-methyl-5-(1-methylethenyl)-, acetate, cis-	Ester	1205-42-1	137355	103292	104091	9	9	9	1.06484	0.00940644	7.83205e-05	-13.6402	down
KMW0518	C12H20O2	2,6-Octadien-1-ol, 3,7-dimethyl-, acetate, (Z)-	Ester	141-12-8	7.54903e+06	5.14931e+06	5.50811e+06	22357	21870.9	18024.8	1.06389	0.0149267	0.00341927	-8.1921	down
XMW1340	C7H6S2	Thieno[2,3-b]thiophene,2-methyl-	Heterocyclic compound	13393-75-4	31369.8	23712.3	24619.2	2755.54	3587.17	2828.57	1.05878	0.00972011	0.115071	-3.11941	down
XMW0693	C11H18O2	2,6-Octadienoic acid, 3,7-dimethyl-, methyl ester	Ester	2349-14-6	17763.7	10132.3	11131.5	536748	659139	601430	1.06027	0.0034937	46.0526	5.52521	up
XMW0722	C9H12O2	1-Cyclohexene-1-carboxAldehyde, 5,5-dimethyl-3-oxo-	Aldehyde	56621-35-3	9	9	9	1.34245e+06	1.51177e+06	1.45637e+06	1.06504	0.00120106	159651	17.2846	up
WMW0204	C12H18O2	Bicyclo[3.1.0]hexan-3-ol, 4-methylene-1-(1-methylethyl)-, acetate	Terpenoids	3536-54-7	88520.6	54551.9	66312.8	3.49192e+06	4.01447e+06	3.83839e+06	1.06224	0.00164143	54.1813	5.75972	up
XMW0803	C12H20O2	Iso-3-thujyl acetate	Ester	62181-90-2	276720	145468	163488	7.28264e+06	7.87298e+06	7.76441e+06	1.05907	0.000337267	39.1343	5.29036	up
NMW0125	C7H6O3	Salicylic Acid	Acid	69-72-7	4192.29	2215.69	2255.42	60481.6	69664.9	66806.4	1.0556	0.00112648	22.7339	4.50677	up
XMW0952	C12H24O2	4-Methylhexyl 3-methylbutanoate	Ester	1215127-80-2	9	9	9	49241.2	57669.6	52573.9	1.06496	0.0021192	5906.84	12.5282	up
XMW0081	C7H11NO3	L-Proline, 1-acetyl-	Acid	68-95-1	469287	317801	341229	9865.3	7629.86	6634.95	1.06104	0.015939	0.0213859	-5.54719	down
NMW0157	C8H9NO	Acetamide, N-phenyl-	Amine	103-84-4	5.67248e+06	3.87809e+06	4.20475e+06	88463.7	108066	102987	1.06262	0.0147919	0.0217746	-5.52121	down
D402	C10H14O2	Piperitenone oxide	Ketone	35178-55-3	278458	195575	212488	9	9	9	1.06482	0.0119899	3.93287e-05	-14.6341	down
KMW0717	C8H14O6	(+)-Diethyl L-tartrate	Ester	87-91-2	10482	8978.08	8037.62	2.853e+06	3.02997e+06	2.95314e+06	1.0647	0.000303578	321.34	8.32796	up
XMW0294	C11H20O	10-Undecenal	Aldehyde	112-45-8	105577	49631	63050.7	2669042	2866150	2852651	1.05746	0.000249597	38.4307	5.26419	up
D457	C12H24O2	1-Hexanol, 5-methyl-2-(1-methylethyl)-, acetate	Ester	40853-55-2	4.02258e+06	2.8531e+06	3.11188e+06	13485.1	12522	12106	1.06424	0.0112429	0.00381606	-8.0337	down
KMW0446	C10H16O	Citral	Terpenoids	5392-40-5	272212	285073	365833	21915.9	17845	20811.8	1.06142	0.0101278	0.0656174	-3.92978	down
NMW0136	C7H6O2	BenzAldehyde, 3-hydroxy-	Aldehyde	100-83-4	8112.59	6449.21	6695.01	20359.1	22748.7	24511.8	1.05292	0.0020617	3.18108	1.66952	up
XMW1433	C9H14O3	2,6-Heptanedione, 3-acetyl-	Ketone	29214-57-1	490586	352662	400760	7151.26	8537.48	7668.24	1.06356	0.00971826	0.0187756	-5.735	down
NMW0104	C10H18O	2,6-Octadien-1-ol, 3,7-dimethyl-	Terpenoids	624-15-7	1.05905e+08	7.73522e+07	8.65229e+07	50112.1	44389.1	44352.7	1.06466	0.00865485	0.000514692	-10.924	down
KMW0437	C10H12O2	Acetic acid, 2-phenylethyl ester	Ester	103-45-7	2.19083e+06	1.55903e+06	1.7209e+06	625884	606203	597986	1.04656	0.0233411	0.334519	-1.57984	down
NMW0105	C9H12O	Phenol, 4-propyl-	Phenol	645-56-7	7.01434e+07	4.89449e+07	5.67842e+07	270678	249352	227570	1.06412	0.0110516	0.00425081	-7.87805	down
XMW0764	C10H16O	(S)-(-)-(4-Isopropenyl-1-cyclohexenyl)methanol	Terpenoids	18457-55-1	5948.76	5082.03	3911.97	76764.4	88679	84922.7	1.06069	0.00156715	16.755	4.06652	up
NMW0116	C12H21N	Memantine	Amine	19982-08-2	9	9	9	3.23677e+06	3.66346e+06	3.52951e+06	1.06504	0.00131066	386287	18.5593	up
KMW0473	C10H14O	4-Isopropylcyclohexa-1,3-dienecarbAldehyde	Aldehyde	1197-15-5	9	9	9	1.30342e+07	1.46576e+07	1.41505e+07	1.06505	0.00117985	1.54972e+06	20.5636	up
XMW1096	C12H22O2	Butanoic acid, 1-ethenylhexyl ester	Ester	16491-54-6	4067.33	2128.28	1826.53	33467.7	40666.4	39853.6	1.04719	0.00212926	14.2092	3.82875	up
NMW0123	C10H20O2	p-Menthane-3,8-diol, cis-1,3,trans-1,4-	Terpenoids	3564-98-5	69366.7	35662.3	41098.3	1.71378e+06	1.84694e+06	1.83218e+06	1.0586	0.000294888	36.9055	5.20577	up
D356	C8H10O2	3-Methoxy-5-methylphenol	Phenol	3209-13-0	6620.24	4509.62	3657.95	16094.7	17266.3	15883.4	1.02451	0.00155564	3.33007	1.73555	up
XMW0953	C11H14O2	Phenylacetic acid propyl ester	Ester	4606-15-9	14878.2	9429.11	5427.39	147427	153648	159777	1.04327	1.03945e-05	15.4988	3.95408	up
KMW0453	C12H20O2	Linalyl acetate	Terpenoids	115-95-7	624156379	4.50044e+08	5.13516e+08	316910	88700.5	52728.7	1.05641	0.00911894	0.000288678	-11.7582	down
KMW0456	C10H22O	1-Decanol	Alcohol	112-30-1	26758.3	29019	37412.3	9	9	9	1.06479	0.010717	0.000289732	-11.753	down
w02	C10H18O	2,4-Decadien-1-ol	Alcohol	14507-02-9	9	9	9	5.61871e+06	6.2516e+06	6.08739e+06	1.06505	0.00100192	665100	19.3432	up
NMW0108	C10H14O2	Bicyclo[2.2.1]heptane-2,5-dione, 1,7,7-trimethyl-	Terpenoids	4230-32-4	1.06086e+08	7.73909e+07	8.6685e+07	49554.4	45478.1	46310.6	1.06469	0.00870547	0.000523179	-10.9004	down
NMW0109	C7H8O2	1,2-Benzenediol, 3-methyl-	Alcohol	488-17-5	1.49259e+06	1.09855e+06	1.15247e+06	9	9	9	1.06492	0.00962973	7.21228e-06	-17.0811	down
XMW1468	C11H20O	(2,2,6-Trimethyl-bicyclo[4.1.0]hept-1-yl)-methanol	Alcohol	78996-11-9	5.92236e+07	4.19106e+07	4.74607e+07	9	9	9	1.06497	0.010452	1.81702e-07	-22.3919	down
XMW0643	C7H12N2O	Butyramide, 2-cyano-2-ethyl-	Amine	18705-38-9	9	9	9	3.80746e+07	42980239	4.15164e+07	1.06505	0.00126408	4.53967e+06	22.1142	up
NMW0120	C10H14O	Phenol, p-tert-butyl-	Phenol	98-54-4	52414	27570.6	31055.5	1.588e+06	1.71335e+06	1.69916e+06	1.05953	0.000385951	45.0334	5.49292	up
XMW0968	C10H14O	4,7,7-Trimethylbicyclo[4.1.0]hept-3-en-2-one	Ketone	81800-50-2	12652.5	9956.93	6319.94	120854	133407	123950	1.05221	0.000132824	13.0736	3.70858	up
XMW0783	C10H16O	1-Adamantanol	Alcohol	768-95-6	369430	523773	211573	9	9	9	1.06369	0.0550033	2.44393e-05	-15.3204	down
XMW1470	C10H16O	[1,1'-Bicyclopentyl]-2-one	Ketone	4884-24-6	113795	121782	154178	14371	12796.3	12407	1.06093	0.0108635	0.101536	-3.29993	down
WMW0069	C9H8O	2-Propenal, 3-phenyl-	Aldehyde	104-55-2	9	9	9	305997	307148	299054	1.06507	6.91222e-05	33785.2	15.0441	up
D139	C11H16O	Benzenepropanol, .alpha.,.alpha.-dimethyl-	Alcohol	103-05-9	9	9	9	643482	715571	690005	1.06504	0.000953115	75891	16.2116	up
KMW0469	C9H12O2	Phenol, 4-ethyl-2-methoxy-	Phenol	2785-89-9	9	9	9	2.84925e+06	3.28339e+06	3.1466e+06	1.06503	0.00171211	343676	18.3907	up
NMW0122	C11H18O2	Geranyl formate	Ester	105-86-2	48853.6	25563.7	30645.1	1.28486e+06	1.35169e+06	1.35394e+06	1.05931	9.44294e-05	37.9821	5.24725	up
XMW0640	C15H24	Panaxene	Terpenoids	871660-95-6	13208	10667.6	7138.15	137140	160091	152530	1.05523	0.00133488	14.502	3.85818	up
D390	C11H18O	Cyclopentanone, 2-(2-hexenyl)-	Ketone	34687-46-2	4014.76	4467.65	3137.95	9	9	9	1.0644	0.010047	0.00232351	-8.74948	down
XMW0036	C10H16O2	1,3-Cyclopentanedione, 4-(3-methylbutyl)-	Ketone	939-86-6	14507.9	20725.1	8789.22	1081.8	921.894	983.604	1.04559	0.0579958	0.0678588	-3.88132	down
XMW1061	C10H16S	Thiophene, 2-hexyl-	Heterocyclic compound	18794-77-9	9	9	9	980787	1.11062e+06	1.07527e+06	1.06503	0.00134526	117285	16.8397	up
XMW0448	C2H4N6	1,2,4,5-Tetrazine-3,6-diAmine	Heterocyclic compound	19617-90-4	9	9	9	868484	989407	958329	1.06503	0.0014883	104304	16.6704	up
D143	C10H12O2	Benzenepropanoic acid, methyl ester	Ester	103-25-3	9	9	9	4.85119e+06	5.03018e+06	4.98155e+06	1.06507	0.000116313	550479	19.0703	up
KMW0474	C11H22O	2-Undecanone	Ketone	112-12-9	11294.3	5794.36	8048.07	296613	316469	312972	1.05915	0.000187991	36.8406	5.20322	up
WMW0106	C11H20O2	6-Nonen-1-ol, acetate, (Z)-	Ester	76238-22-7	22056.4	19384	12796	292503	328589	318633	1.058	0.000719869	17.3265	4.1149	up
XMW0424	C11H18O	2,6-Dimethyl-1-nonen-3-yn-5-ol	Alcohol	19780-98-4	453856	235669	292966	1.28616e+06	1.46023e+06	1.42088e+06	1.02957	0.000289983	4.24154	2.08459	up
NMW0114	C8H10O2	3-Methoxybenzyl Alcohol	Alcohol	6971-51-3	798.218	9	9	373931	429511	418397	1.01357	0.00173216	1496.95	10.5478	up
D184	C6H6O2	Hydroquinone	Phenol	123-31-9	9	9	9	633447	722367	690361	1.06503	0.00145028	75784.3	16.2096	up
KMW0466	C10H18S	3-Cyclohexene-1-methanethiol, .alpha.,.alpha.,4-trimethyl-	Sulfur compounds	71159-90-5	22599.1	11476.1	15276.8	7.55641e+07	8.55013e+07	8.23866e+07	1.06392	0.00130554	4932.98	12.2682	up
KMW0467	C9H8O	(E)-CinnamAldehyde	Aldehyde	14371-10-9	92656.7	72351.4	74976.3	3735.15	4254.84	4386.41	1.063	0.00694594	0.0515717	-4.27728	down
KMW0508	C10H14O	p-Cymen-7-ol	Alcohol	536-60-7	8804.39	7591.74	7227.97	201496	229799	221493	1.06408	0.0015533	27.6323	4.78828	up
WMW0181	C11H20O2	4-Decenoic acid, methyl ester, Z-	Ester	7367-83-1	8028.77	10786.4	10751.3	324511	407604	344541	1.06246	0.0050588	36.4147	5.18645	up
D193	C10H16O	p-Mentha-1,8-dien-7-ol	Terpenoids	536-59-4	20647.3	20976.9	11209	1.0055e+07	1.16808e+07	1.12312e+07	1.06287	0.00194542	623.981	9.28536	up
KMW0509	C15H24	Cyclohexene, 4-ethenyl-4-methyl-3-(1-methylethenyl)-1-(1-methylethyl)-, (3R-trans)-	Terpenoids	20307-84-0	295575	165172	207240	577504	648946	635990	1.01191	0.00228968	2.78814	1.4793	up
NMW0142	C12H20O2	Cyclohexanol, 1-methyl-4-(1-methylethylidene)-, acetate	Ester	10235-63-9	71072.6	35382.6	50654	489025	526160	518327	1.04923	7.95616e-06	9.7608	3.287	up
XMW0733	C10H16O2	7-Oxabicyclo[4.1.0]heptan-2-one, 3-methyl-6-(1-methylethyl)-	Terpenoids	5729-99-7	1.06043e+08	7.74035e+07	8.65701e+07	50112.1	45205.4	47572.5	1.06467	0.00869603	0.00052919	-10.8839	down
D452	C10H14O2	Carvone oxide, trans-	Terpenoids	39903-97-4	2.18831e+07	1.54375e+07	1.78541e+07	101584	119602	114255	1.06407	0.0104117	0.00607962	-7.3618	down
KMW0384	C8H9NO2	Benzene, (2-nitroethyl)-	Aromatics	6125-24-2	1825.36	2121.49	1320.15	29716.7	31374.4	31318.2	1.06011	4.37434e-05	17.545	4.13298	up
XMW1459	C10H16S	Thiophene, 2-butyl-5-ethyl-	Heterocyclic compound	54411-06-2	9	9	9	486273	555425	527070	1.06502	0.00146981	58102.5	15.8263	up
XMW1464	C11H16O	Benzene, (butoxymethyl)-	Ether	588-67-0	100694779	7.03572e+07	8.09415e+07	127322	134039	152858	1.06427	0.0110522	0.00164377	-9.24878	down
D430	C7H9NOS	5-Acetyl-2,4-dimethylthiazole	Heterocyclic compound	38205-60-6	1.50175e+06	1.09496e+06	1.23421e+06	9	9	9	1.06493	0.00862396	7.0479e-06	-17.1144	down
XMW0109	C13H28	Dodecane, 4-methyl-	Hydrocarbons	6117-97-1	1.26754e+06	898275	1.01631e+06	1085	1074.82	1256.2	1.0644	0.0103958	0.0010735	-9.86346	down
XMW1444	C10H16O	Carvenone	Terpenoids	499-74-1	4.04893e+06	2.87946e+06	3.28402e+06	9	9	9	1.06493	0.00999471	2.64384e-06	-18.5289	down
XMW1320	C9H14O2	4-Isopropyl-1,3-cyclohexanedione	Ketone	62831-62-3	1.05832e+08	7.72992e+07	8.64979e+07	11560.3	12212.5	10239.3	1.06483	0.00864097	0.000126144	-12.9526	down
KMW0450	C8H10O2	Benzenemethanol, 4-methoxy-	Phenol	105-13-5	9	9	9	375968	431436	419077	1.06502	0.00168691	45425.2	15.4712	up
NMW0107	C9H7N	Isoquinoline	Heterocyclic compound	119-65-3	86694.2	62197	70652.1	5116.13	6527.95	6778.83	1.05916	0.0109774	0.0839148	-3.57493	down
XMW1141	C7H7NO2	1H-Pyrrole-2,5-dione, 3-ethenyl-4-methyl-	Heterocyclic compound	21494-57-5	1.79019e+07	1.23781e+07	1.42657e+07	106590	113422	106407	1.06403	0.0118789	0.00732774	-7.09242	down
XMW0937	C12H18O2	(1R,5S,6R)-2,7,7-Trimethylbicyclo[3.1.1]hept-2-en-6-yl acetate	Ester	67999-48-8	1.51353e+07	1.0488e+07	1.21313e+07	33250.3	27272.1	26156.9	1.06406	0.0115392	0.00229586	-8.76675	down
WMW0025	C10H14O	Thymol	Terpenoids	89-83-8	9207.58	6295.03	7227.97	201496	229799	221493	1.06247	0.00144899	28.7185	4.84391	up
NMW0110	C6H6N2O	Picolinamide	Heterocyclic compound	1452-77-3	9.18883e+07	6.42077e+07	7.36882e+07	18302.3	51802.3	49134.1	1.06069	0.0110687	0.000518916	-10.9122	down
XMW0939	C12H20O2	4-Hexen-1-ol, 5-methyl-2-(1-methylethenyl)-, acetate	Ester	25905-14-0	1.05263e+08	7.66157e+07	8.60041e+07	9	9	9	1.06499	0.00879906	1.0079e-07	-23.2421	down
XMW1330	C13H28	Dodecane, 3-methyl-	Hydrocarbons	17312-57-1	9	9	9	3.47984e+06	3.75273e+06	3.78944e+06	1.06506	0.000705806	408223	18.639	up
KMW0458	C12H20O2	p-Menth-8-en-3-ol, acetate	Ester	89-49-6	8.15723e+07	5.77034e+07	6.60696e+07	1.51763e+06	1.46644e+06	1.34197e+06	1.06344	0.0107114	0.0210671	-5.56886	down
NMW0111	C11H17N	BenzeneethanAmine, N,.alpha.,.alpha.-trimethyl-	Amine	100-92-5	9	9	9	4.72302e+06	5.33461e+06	5.1497e+06	1.06504	0.00127381	563235	19.1034	up
NMW0112	C10H14O	Phenol, 2-(1,1-dimethylethyl)-	Phenol	88-18-6	3525.89	3333.65	4329.38	827464	931882	889042	1.06445	0.00118509	236.697	7.8869	up
KMW0459	C10H16O	2,6-Octadienal, 3,7-dimethyl-, (E)-	Terpenoids	141-27-5	5.87477e+07	4.13916e+07	4.69919e+07	9	9	9	1.06497	0.0107	1.8351e-07	-22.3776	down
D422	C11H24O	Undecanol-5	Alcohol	37493-70-2	41724.5	21237	25168.4	1.84231e+07	2.1092e+07	2.02851e+07	1.063	0.00157169	678.546	9.4063	up
D333	C12H18O2	(+)-cis-Verbenol, acetate	Ester	29135-27-1	9	9	9	3.31527e+06	3.7491e+06	3.61798e+06	1.06504	0.001299	395643	18.5938	up
XMW0364	C11H24O	6-Undecanol	Alcohol	23708-56-7	9	9	9	3.98592e+06	4.49194e+06	4.35128e+06	1.06504	0.00124124	475153	18.858	up
D299	C10H18O	Ethanol, 2-(3,3-dimethylcyclohexylidene)-, (Z)-	Alcohol	26532-23-0	1.05977e+08	7.74009e+07	8.6638e+07	9	9	9	1.065	0.00863681	9.99942e-08	-23.2536	down
D222	C11H20O2	Hexanoic acid, 3-methyl-2-butenyl ester	Ester	76649-22-4	9	9	9	1.4259e+06	1.61245e+06	1.55256e+06	1.06504	0.00128872	170034	17.3755	up
XMW1391	C11H17N	Pyridine, 2-hexyl-	Heterocyclic compound	1129-69-7	9	9	9	2.30217e+07	2.58182e+07	2.50205e+07	1.06505	0.00113932	2.73557e+06	21.3834	up
XMW0108	C14H30	2,4-Dimethyldodecane	Hydrocarbons	6117-99-3	9	9	9	211732	240520	232066	1.06502	0.00139982	25345.1	14.6294	up
XMW1147	C10H16O	Tricyclo[2.2.1.0(2,6)]heptane-3-methanol, 2,3-dimethyl-	Terpenoids	29550-55-8	9	9	9	7.56487e+07	8.55966e+07	8.24796e+07	1.06505	0.00130494	9.02685e+06	23.1058	up
XMW1063	C4H4N6	4,4'-Bitriazolyl	Heterocyclic compound	16227-15-9	9	9	9	6.6645e+06	7.60664e+06	7.31223e+06	1.06504	0.00149272	799384	19.6085	up
NMW0117	C11H8	Benzene, 2,4-pentadiynyl-	Aromatics	41268-41-1	9	9	9	1.94098e+06	2.22407e+06	2.13562e+06	1.06503	0.00158134	233358	17.8322	up
[truncated: 215 more rows]

## Sheet: F1TH-3 vs F1TH-4
Index	Formula	Compounds	Class I	CAS	F1Tcolour-1	F1Tcolour-2	F1Tcolour-3	F1TFlower-1	F1TFlower-2	F1TFlower-3	VIP	P-value	Fold_Change	Log2FC	Type
[truncated: 46 more rows]

[truncated: 2 more sheets: F1TH-3 vs F1TH-5, F1TH-4 vs F1TH-5]
